# Supplementary material for: Transcriptomics and iTRAQ-proteomics analyses provide novel insights into the defense mechanism of black shank disease in tobacco
Source: Front Plant Sci. 2022 Oct 20;13:991074. doi: 10.3389/fpls.2022.991074 (PMC9634741; doi:10.3389/fpls.2022.991074)
Supplement: Supplementary file 1 [file Table_1.XLSX]

## Sheet: Sheet1
Supplementary Table S1. Overview of RNA-seq Data in this study.
Sample	HD_0h_1	HD_0h_2	HD_0h_3	RBS89_0h_1	RBS89_0h_2	RBS89_0h_3	HD_24h_1	HD_24h_2	HD_24h_3	RBS89_24h_1	RBS89_24h_2	RBS89_24h_3	HD_48h_1	HD_48h_2	HD_48h_3	RBS89_48h_1	RBS89_48h_2	RBS89_48h_3
Total pairs	30657796	28536288	26273547	31473026	27249935	25726625	30382628	29332744	25981674	27907887	27863767	20880412	29689860	28120026	27163989	27482281	26678839	25322695
Total unpaired reads	26227614	24612736	22875580	25935106	22925314	21553754	26906996	25764466	23232688	24562440	24562440	18364632	24803090	23595656	23115462	22980364	22211654	21392028
Overall alignment rate	0.6265	0.6288	0.6256	0.644	0.6353	0.6391	0.6237	0.6249	0.6222	0.6195	0.6195	0.6218	0.6325	0.6343	0.6339	0.6372	0.6379	0.6353
Total length	150	150	150	150	150	150	150	150	150	150	150	150	150	150	150	150	150	150
