# Supplementary material for: Transcriptomics and iTRAQ-proteomics analyses provide novel insights into the defense mechanism of black shank disease in tobacco
Source: Front Plant Sci. 2022 Oct 20;13:991074. doi: 10.3389/fpls.2022.991074 (PMC9634741; doi:10.3389/fpls.2022.991074)
Supplement: Supplementary file 2 [file Table_2.XLSX]

## Sheet: HD 0 h vs RBS89 0 h
Supplementary Table S2. Differentially expressed genes were identified in this study.
Gene	logFC	logCPM	PValue	FDR	HD_0h_1	HD_0h_2	HD_0h_3	RBS89_0h_1	RBS89_0h_2	RBS89_0h_3
Nitab4.5_0002728g0040.1	8.56061	4.16091	1.97948e-18	1.12561e-16	0	0	0	46.232	18.567	46.508
Nitab4.5_0002793g0070.1	8.3914	4.00353	5.46106e-21	3.88723e-19	0	0	0	44.802	20.08	33.489
Nitab4.5_0000798g0030.1	7.84224	3.50175	2.05129e-12	5.84879e-11	0.177	0.158	0.25	28.855	9.099	29.153
Nitab4.5_0002793g0060.1	7.52618	3.22897	5.66396e-16	2.49326e-14	0	0	0	24.457	11.978	18.341
Nitab4.5_0001231g0050.1	7.50424	6.49521	6.33815e-44	3.85532e-41	0.51	1.743	0.631	273.938	143.372	159.891
Nitab4.5_0000698g0030.1	7.40169	3.12348	2.75513e-18	1.54049e-16	0	0	0	12.515	20.181	16.246
Nitab4.5_0001122g0040.1	7.11327	2.89257	0.000456508	0.00281434	0	0	0	0	16.393	23.853
Nitab4.5_0001231g0040.1	7.00421	2.79285	8.82339e-10	1.77645e-08	0	0	0	20.643	9.368	7.888
Nitab4.5_0002372g0010.1	6.9858	2.76783	4.20577e-05	0.000344863	0	0	0	26.924	1.367	8.448
Nitab4.5_0000728g0010.1	6.90932	4.28717	0.000514671	0.00310806	0	0	0.461	69.259	0	53.32
Nitab4.5_0000855g0160.1	6.89837	2.71009	1.57576e-09	3.04723e-08	0	0	0	11.942	6.129	17.4
Nitab4.5_0000604g0130.1	6.76159	2.59421	0.0009411	0.00525326	0.167	0.267	0.1	16.269	0.101	15.249
Nitab4.5_0002793g0010.1	6.53124	3.94171	1.20313e-20	8.27071e-19	0.118	0	0.431	34.814	19.049	39.886
Nitab4.5_0002347g0190.1	6.51433	4.65112	9.92289e-06	9.38211e-05	0.569	0.158	0.421	90.272	2.824	66.014
Nitab4.5_0006949g0030.1	6.48507	2.39704	5.0814e-09	8.95513e-08	0	0	0.1	8.653	5.132	12.067
Nitab4.5_0000142g0340.1	6.33847	2.28912	2.56802e-07	3.33211e-06	0	0	0	10.906	3.328	9.423
Nitab4.5_0002793g0050.1	6.33494	2.28888	1.63943e-08	2.63267e-07	0.088	0.149	0.18	10.298	4.079	9.77
Nitab4.5_0000170g0390.1	6.14917	4.30536	3.02725e-05	0.000257047	0.412	0.109	0.491	66.137	1.726	55.784
Nitab4.5_0002584g0030.1	6.04368	2.08839	3.88459e-07	4.87041e-06	0.088	0.297	0	10.286	3.911	5.255
Nitab4.5_0000223g0070.1	5.75787	1.90567	5.001e-06	5.03941e-05	0.118	0.158	0.1	6.96	2.297	6.073
Nitab4.5_0006949g0020.1	5.75763	1.90556	4.63182e-06	4.70519e-05	0.059	0.069	0.15	6.102	2.544	6.946
Nitab4.5_0006302g0010.1	5.75726	1.90524	3.82533e-06	3.93975e-05	0	0	0	7.127	4.785	3.552
Nitab4.5_0000180g0080.1	5.73087	4.39604	2.94007e-15	1.19951e-13	0.795	0.981	0.951	73.693	27.442	29.265
Nitab4.5_0003586g0030.1	5.691	1.85665	0.00383588	0.0174716	0	0	0	6.841	0	7.742
Nitab4.5_0000900g0030.1	5.67637	1.85608	7.64841e-06	7.4347e-05	0	0	0.31	7.461	3.003	4.067
Nitab4.5_0001728g0050.1	5.62014	7.42422	2.56095e-68	7.34371e-65	3.286	8.646	9.653	440.001	329.784	308.444
Nitab4.5_0001231g0110.1	5.60571	1.80549	0.0041085	0.0184913	0	0	0	6.877	0	6.722
Nitab4.5_0002728g0050.1	5.50125	1.75197	5.93949e-05	0.0004702	0.196	0.287	0.16	4.958	1.95	5.68
Nitab4.5_0001438g0090.1	5.40229	1.69673	6.11395e-05	0.000482032	0	0	0	4.267	2.219	4.963
Nitab4.5_0000072g0070.1	5.3456	4.04608	1.99051e-29	3.09732e-27	0.451	0.703	0.761	41.501	31.24	26.845
Nitab4.5_0000423g0060.1	5.33408	7.98767	3.65539e-37	1.20286e-34	6.092	14.688	18.955	652.605	387.513	543.369
Nitab4.5_0002257g0090.1	5.30539	1.6401	0.000794497	0.00454098	0.177	0	0.22	6.698	0.695	4.101
Nitab4.5_0001438g0010.1	5.298	1.63973	0.000122251	0.000885331	0	0	0	4.434	2.039	5.255
Nitab4.5_0002288g0040.1	5.298	1.6393	0.000122251	0.000885331	0	0	0.26	4.1	4.549	2.969
Nitab4.5_0002791g0030.1	5.28368	4.61999	3.79258e-29	5.72394e-27	2.178	0	1.572	64.802	37.392	49.678
Nitab4.5_0000056g0150.1	5.18655	1.58007	0.000498332	0.00302754	0.147	0.337	0.18	3.147	1.58	6.229
Nitab4.5_0000159g0130.1	5.18655	1.58007	0.000498332	0.00302754	0.137	0.079	0.17	2.527	1.916	5.759
Nitab4.5_0000109g0240.1	5.18557	1.58014	0.000244451	0.00163181	0.157	0.228	0	4.362	2.857	3.395
Nitab4.5_0003129g0080.1	5.18557	1.58	0.000244451	0.00163181	0.294	0.347	0	4.326	3.261	2.207
Nitab4.5_0003435g0020.1	5.18557	1.5796	0.000244451	0.00163181	0.196	0.277	0.15	3.933	4.762	2.095
Nitab4.5_0007908g0020.1	5.17015	4.75228	3.126e-49	2.61451e-46	1.422	1.406	1.732	63.181	48.889	53.992
Nitab4.5_0000040g0350.1	5.09816	5.36531	1.90078e-23	1.73429e-21	3.002	2.377	2.383	127.863	55.556	73.711
Nitab4.5_0002728g0090.1	5.06364	1.51822	0.000488806	0.00297959	0	0	0	3.885	1.614	4.157
Nitab4.5_0002402g0010.1	4.97702	7.37557	1.17296e-40	4.90515e-38	7.877	10.796	13.608	446.568	236.309	348.499
Nitab4.5_0000040g0110.1	4.9442	4.30682	2.59586e-22	2.07596e-20	0.834	0.961	2.033	51.822	41.583	27.192
Nitab4.5_0000223g0020.1	4.93045	1.45352	0.000977437	0.00542201	0	0	0	3.969	1.591	3.451
Nitab4.5_0001697g0070.1	4.93045	1.45341	0.000977437	0.00542201	0.098	0.109	0.12	2.431	1.333	4.336
Nitab4.5_0000299g0240.1	4.93044	1.45312	0.000977437	0.00542201	0.108	0	0.25	2.443	3.104	2.543
Nitab4.5_0004607g0030.1	4.92992	1.45319	0.0085117	0.0337525	0	0	0	4.66	4.236	0
Nitab4.5_0000103g0030.1	4.88714	5.02095	2.40422e-20	1.61404e-18	2.698	1.575	2.503	91.583	37.762	70.854
Nitab4.5_0000977g0040.1	4.864	7.57973	7.57564e-27	9.27231e-25	11.536	11.538	17.333	558.233	220.184	406.692
Nitab4.5_0001231g0010.1	4.82746	7.5427	3.20225e-12	8.87829e-11	14.047	11.42	15.11	527.543	102.058	523.639
Nitab4.5_0006089g0060.1	4.78369	1.38598	0.00195456	0.00984043	0.049	0.119	0.13	3.659	1.031	3.384
Nitab4.5_0001000g0010.1	4.78369	1.38584	0.00195456	0.00984043	0.255	0	0.32	4.052	1.389	2.342
Nitab4.5_0000308g0180.1	4.78369	1.38562	0.00195456	0.00984043	0	0	0	1.633	1.535	4.269
Nitab4.5_0000198g0010.1	4.78369	1.38547	0.00195456	0.00984043	0	0	0	2.014	2.476	3.843
Nitab4.5_0001697g0020.1	4.78369	1.38533	0.00195456	0.00984043	0	0.119	0	2.145	3.261	2.7
Nitab4.5_0005743g0040.1	4.77657	1.38514	0.0133694	0.0489716	0	0	0	2.92	5.39	0
Nitab4.5_0002386g0030.1	4.76931	3.53164	1.06063e-09	2.10375e-08	0.461	0.812	0.671	24.028	8.247	34.206
Nitab4.5_0000514g0010.1	4.62095	1.3148	0.00492849	0.0215205	0	0.297	0.16	1.478	0.695	4.448
Nitab4.5_0000402g0160.1	4.6203	1.31488	0.00390854	0.0177222	0.078	0.089	0.19	3.218	1.983	2.106
Nitab4.5_0002995g0080.1	4.6203	1.31477	0.00390854	0.0177222	0.069	0.347	0.2	2.324	2.051	2.465
Nitab4.5_0000137g0170.1	4.6203	1.31466	0.00390854	0.0177222	0.137	0	0	1.752	1.468	3.451
Nitab4.5_0003265g0050.1	4.60296	2.96605	2.40107e-14	8.85967e-13	0.451	0.376	0.27	16.984	11.71	13.008
Nitab4.5_0002287g0080.1	4.51314	5.27643	9.8714e-48	7.33884e-45	2.639	2.347	5.367	92.286	77.16	67.862
Nitab4.5_0000527g0150.1	4.4463	3.59229	5.23046e-23	4.52547e-21	0.755	0.733	1.252	25.053	23.789	19.954
Nitab4.5_0000170g0130.1	4.43601	1.24033	0.00781606	0.0313972	0.167	0.059	0.34	2.419	0.728	2.554
Nitab4.5_0001088g0020.1	4.43601	1.24033	0.00781606	0.0313972	0.02	0.168	0	2.908	1.042	2.319
Nitab4.5_0000303g0090.1	4.43601	1.24022	0.00781606	0.0313972	0.275	0.099	0.11	1.538	0.482	3.081
Nitab4.5_0000108g0350.1	4.43601	1.24008	0.00781606	0.0313972	0	0	0	2.074	1.445	2.342
Nitab4.5_0001014g0030.1	4.43601	1.23993	0.00781606	0.0313972	0.177	0.327	0.35	1.526	2.947	1.826
Nitab4.5_0003295g0020.1	4.43601	1.23993	0.00781606	0.0313972	0.196	0.168	0.33	2.145	2.521	1.625
Nitab4.5_0000082g0180.1	4.35156	4.52749	7.54934e-30	1.22208e-27	1.726	3.278	1.392	56.983	43.241	38.261
Nitab4.5_0000102g0150.1	4.32544	2.16997	8.08295e-07	9.57787e-06	1.04	0.297	0	6.341	6.667	6.655
Nitab4.5_0002906g0120.1	4.31151	5.95254	1.70772e-69	5.71317e-66	7.916	4.596	6.348	131.904	113.958	132.027
Nitab4.5_0000257g0180.1	4.30756	7.62692	1.64409e-80	1.10006e-76	20.668	23.513	16.612	459.404	362.279	381.091
Nitab4.5_0006543g0010.1	4.26589	8.01607	2.46897e-42	1.23899e-39	22.709	27.652	31.972	685.417	504.542	384.127
Nitab4.5_0000223g0050.1	4.23175	3.8992	1.49527e-24	1.50073e-22	1.766	1.664	1.212	29.356	22.579	33.589
Nitab4.5_0002292g0010.1	4.22249	4.79536	1.01942e-35	2.84205e-33	2.953	2.555	3.134	44.898	58.29	62.585
Nitab4.5_0000605g0210.1	4.19619	2.08637	5.74171e-06	5.69715e-05	0.255	0.594	0	6.341	7.72	4.75
Nitab4.5_0000737g0060.1	4.19352	6.41722	3.37274e-51	3.07732e-48	10.525	8.537	8.762	204.011	176.764	138.638
Nitab4.5_0001654g0010.1	4.19112	7.21171	2.84357e-59	4.07707e-56	21.757	13.212	14.289	332.864	318.007	247.932
Nitab4.5_0003603g0070.1	4.14809	3.3397	5.09311e-10	1.05832e-08	1.354	0.951	1.041	17.401	10.309	28.716
Nitab4.5_0000790g0010.1	4.12457	5.09697	1.05358e-26	1.26638e-24	3.943	3.338	4.366	89.414	49.236	67.929
Nitab4.5_0001780g0010.1	4.11131	8.66579	2.19684e-31	4.36606e-29	37.766	32.793	71.965	964.945	736.884	748.692
Nitab4.5_0000770g0120.1	4.09756	7.20651	2.12652e-38	7.35958e-36	14.547	18.016	19.516	396.235	270.608	226.869
Nitab4.5_0004166g0010.1	4.06557	4.26054	0.000762077	0.00437813	1.923	2.456	2.073	58.771	1.177	53.667
Nitab4.5_0000109g0470.1	4.06361	7.09255	8.24689e-33	1.88113e-30	11.909	17.095	19.566	301.685	186.916	334.292
Nitab4.5_0000287g0030.1	4.05319	8.06098	5.68446e-41	2.42775e-38	18.648	40.706	37.73	620.127	492.53	496.211
Nitab4.5_0000119g0120.1	4.03791	7.33858	5.42329e-36	1.60091e-33	11.094	25.533	23.451	331.446	265.006	378.223
Nitab4.5_0002673g0040.1	4.03541	6.47319	2.60351e-28	3.62918e-26	8.622	10.251	13.718	208.052	115.897	211.99
Nitab4.5_0000368g0130.1	4.02874	3.72315	1.36257e-22	1.12094e-20	0.677	1.912	1.772	20.774	29.817	24.1
Nitab4.5_0000512g0150.1	4.024	3.72189	2.08144e-13	6.80469e-12	2.756	0.723	1.051	17.771	35.958	20.671
Nitab4.5_0000723g0150.1	3.94605	4.93461	1.68814e-15	7.00127e-14	1.726	6.141	4.546	85.755	60.688	36.346
Nitab4.5_0000170g0410.1	3.93695	6.41035	4.0628e-10	8.54849e-09	9.662	10.201	13.958	255.607	53.001	204.718
Nitab4.5_0000014g0070.1	3.90026	3.14173	3.3662e-14	1.2132e-12	0.402	1.238	0.481	14.517	16.629	15.663
Nitab4.5_0000021g0070.1	3.87615	2.42762	2.77404e-05	0.000237354	0.726	0.852	0	6.4	14.556	4.101
Nitab4.5_0000072g0590.1	3.85941	7.56647	1.0434e-45	6.98137e-43	24.965	21.977	31.151	458.415	383.233	292.703
Nitab4.5_0004280g0120.1	3.85275	3.76477	2.53738e-22	2.03731e-20	1.481	1.406	2.003	24.457	29.728	22.363
Nitab4.5_0000901g0110.1	3.84469	6.261	2.76153e-34	6.84348e-32	11.035	12.766	7.75	196.395	119.079	143.803
Nitab4.5_0001654g0020.1	3.82613	4.73919	5.22224e-44	3.27581e-41	2.06	4.447	4.286	56.792	48.127	51.796
Nitab4.5_0000142g0310.1	3.81886	4.90238	1.88474e-24	1.84548e-22	2.031	5.051	5.287	64.063	42.39	69.868
Nitab4.5_0000519g0070.1	3.81102	1.8544	0.000145244	0.00103459	0	0.545	0	5.423	5.748	2.622
Nitab4.5_0000319g0290.1	3.78995	5.96485	1.23668e-20	8.44348e-19	6.994	6.21	12.937	178.827	93.665	101.183
Nitab4.5_0002547g0010.1	3.77778	8.80269	7.83055e-32	1.63732e-29	40.591	80.353	72.856	1029.09	929.514	697.322
Nitab4.5_0000270g0090.1	3.75787	4.2637	5.22207e-30	8.80863e-28	1.834	3.338	2.413	43.634	33.19	34.867
Nitab4.5_0000129g0040.1	3.75565	4.48293	2.17296e-30	3.69643e-28	3.835	2.001	3.475	48.318	35.297	46.373
Nitab4.5_0000097g0190.1	3.74025	8.7552	1.84602e-39	7.12597e-37	60.602	62.05	69.572	878.154	605.3	1078.02
Nitab4.5_0000649g0140.1	3.73563	4.74562	6.34313e-29	9.29385e-27	3.129	2.516	6.759	61.286	53.371	42.575
Nitab4.5_0000171g0100.1	3.73126	6.09074	7.33111e-23	6.18308e-21	8.358	12.776	8.992	172.177	149.378	84.523
Nitab4.5_0000130g0300.1	3.72871	1.80409	0.00691966	0.0285388	0.324	0.555	0.04	9.022	3.328	0.493
Nitab4.5_0005901g0010.1	3.72649	8.48076	1.67397e-27	2.19619e-25	51.911	55.701	52.569	719.898	438.766	958.508
Nitab4.5_0004409g0060.1	3.72151	2.98955	0.000170624	0.00119128	2.982	0	0	27.449	6.152	8.806
Nitab4.5_0000005g0310.1	3.70259	5.99484	1.97208e-21	1.46072e-19	8.564	6.16	13.558	169.829	85.306	125.014
Nitab4.5_0000647g0170.1	3.69785	2.67913	8.86311e-06	8.49614e-05	0.441	0.723	0.661	11.99	3.563	16.896
Nitab4.5_0000628g0020.1	3.67433	6.70689	2.60712e-29	4.0256e-27	12.477	23.721	12.647	210.412	250.08	158.256
Nitab4.5_0001780g0050.1	3.66577	5.88856	3.13744e-65	6.29779e-62	7.975	8.349	10.744	119.091	123.034	108.028
Nitab4.5_0000008g0240.1	3.63498	3.39381	9.52164e-08	1.34031e-06	1.295	0.248	2.674	30.738	9.827	16.806
Nitab4.5_0000555g0240.1	3.62501	3.73883	4.92553e-12	1.32712e-10	1.511	1.654	3.154	36.757	18.287	19.439
Nitab4.5_0001782g0030.1	3.62265	1.75019	0.000519574	0.00313008	0.53	0.099	0.11	4.779	5.289	2.319
Nitab4.5_0000571g0030.1	3.62203	7.30705	4.09428e-32	8.65101e-30	19.158	17.62	39.372	319.503	299.148	317.497
Nitab4.5_0004157g0020.1	3.61304	2.24814	4.1928e-07	5.23721e-06	1.717	0.188	0	8.069	6.746	6.431
Nitab4.5_0002328g0020.1	3.60458	7.89571	9.63925e-65	1.75899e-61	35.981	38.428	40.974	546.672	455.451	404.238
Nitab4.5_0000981g0070.1	3.58733	5.57248	1.71655e-18	9.81663e-17	7.73	11.499	3.835	108.507	110.821	61.005
Nitab4.5_0002135g0100.1	3.58703	3.85718	1.35633e-19	8.45515e-18	2.099	1.505	2.954	21.906	25.929	32.727
Nitab4.5_0000721g0240.1	3.57394	2.89102	7.08468e-11	1.66914e-09	0.53	0.485	1.172	13.778	12.259	12.011
Nitab4.5_0000047g0110.1	3.55251	2.20973	8.08295e-07	9.57787e-06	0.893	0.664	0.36	9.094	4.471	7.339
Nitab4.5_0000129g0140.1	3.55251	2.20955	8.08295e-07	9.57787e-06	0.549	0	0.661	7.747	5.278	7.238
Nitab4.5_0001256g0080.1	3.5525	2.20858	8.08295e-07	9.57787e-06	0.638	0.119	0.641	4.565	8.863	6.521
Nitab4.5_0002839g0010.1	3.53779	5.43861	1.15909e-47	8.30946e-45	5.513	4.09	11.635	90.224	78.785	85.083
Nitab4.5_0000254g0050.1	3.52586	3.80584	1.35081e-16	6.53371e-15	1.854	1.278	2.884	26.662	18.959	32.043
Nitab4.5_0000712g0030.1	3.52403	4.99273	4.00189e-23	3.50786e-21	4.444	6.042	5.557	63.336	45.079	77.106
Nitab4.5_0000006g0110.1	3.50886	6.80876	6.85544e-63	1.14674e-59	18.216	21.75	18.184	247.467	204.609	207.094
Nitab4.5_0002692g0050.1	3.48133	2.52758	1.10027e-06	1.26856e-05	1.795	0.198	0.881	14.398	7.127	6.084
Nitab4.5_0003307g0050.1	3.47715	2.52642	3.7009e-08	5.573e-07	1.413	0.228	1.001	9.463	9.973	7.641
Nitab4.5_0000019g0120.1	3.43258	4.63838	7.80167e-24	7.31789e-22	3.227	4.922	5.127	42.43	59.355	41.04
Nitab4.5_0000299g0250.1	3.41765	3.40854	1.01562e-15	4.31917e-14	1.569	1.654	2.503	20.87	17.301	19.047
Nitab4.5_0000421g0110.1	3.41454	7.10055	1.65476e-58	2.2144e-55	21.571	25.464	28.518	250.184	301.983	249.086
Nitab4.5_0003282g0100.1	3.41353	3.22273	4.35903e-12	1.17764e-10	1.53	1.288	1.242	16.138	12.068	20.604
Nitab4.5_0000279g0060.1	3.40658	1.63835	0.00415965	0.0187044	0.118	0.505	0	5.542	4.168	1.199
Nitab4.5_0004203g0070.1	3.40165	4.68374	2.86755e-23	2.56966e-21	8.936	0	5.087	48.032	55.365	44.02
Nitab4.5_0002209g0240.1	3.39105	4.81136	7.42399e-33	1.71289e-30	5.258	6.606	3.515	58.103	58.167	44.928
Nitab4.5_0000028g0350.1	3.35865	7.76864	8.05871e-24	7.52384e-22	26.014	38.735	58.547	514.146	401.083	354.874
Nitab4.5_0000583g0030.1	3.35402	2.08582	1.10014e-05	0.000102521	0.628	0.891	0.22	7.318	5.009	5.322
Nitab4.5_0002728g0020.1	3.35401	2.0851	6.62277e-05	0.00051687	0.128	0.832	0.751	3.588	7.384	5.949
Nitab4.5_0001928g0020.1	3.35145	9.37088	1.78456e-60	2.75549e-57	106.765	123.168	147.595	1444.1	1252.75	1145.75
Nitab4.5_0002077g0160.1	3.34828	2.0845	0.000692293	0.00403379	1.256	0	0	3.945	10.219	3.843
Nitab4.5_0002728g0080.1	3.34629	3.90941	1.04361e-09	2.07204e-08	2.521	1.189	3.374	32.49	13.738	37.13
Nitab4.5_0002986g0050.1	3.33773	7.44852	8.84632e-27	1.06971e-24	27.809	39.25	33.695	368.286	419.975	226.947
Nitab4.5_0000007g0050.1	3.3198	2.70584	5.68984e-09	9.92287e-08	0.971	1.089	1.041	11.668	8.606	11.596
Nitab4.5_0001926g0080.1	3.30004	5.12846	3.02872e-25	3.30411e-23	5.758	8.934	5.878	76.458	49.696	74.898
Nitab4.5_0002257g0180.1	3.284	1.57908	0.00342107	0.0158447	0	0.753	0	4.076	2.656	2.79
Nitab4.5_0003337g0030.1	3.28128	2.04237	0.000121422	0.000882439	0.598	0.763	0.24	7.27	4.124	5.546
Nitab4.5_0000775g0020.1	3.28111	3.11988	2.66406e-07	3.45226e-06	1.589	1.04	2.253	12.646	8.225	23.506
Nitab4.5_0003748g0030.1	3.27954	2.67723	1.05816e-08	1.76123e-07	1.481	0.664	0.901	9.928	7.967	13.366
Nitab4.5_0000663g0130.1	3.2537	9.12148	3.44003e-23	3.02859e-21	121.106	65.734	150.729	1053.39	988.443	1169.15
Nitab4.5_0000694g0210.1	3.24702	5.26295	1.471e-05	0.000133608	9.113	5.843	8.061	97.256	14.455	109.429
Nitab4.5_0002176g0010.1	3.24505	3.70776	7.35798e-13	2.26877e-11	1.668	3.209	2.924	23.277	16.393	31.326
Nitab4.5_0004728g0030.1	3.24096	5.07575	1.07904e-07	1.50101e-06	6.082	2.734	11.245	93.871	28.439	71.425
Nitab4.5_0000183g0020.1	3.23895	3.42602	1.04809e-08	1.74736e-07	1.089	2.02	2.473	20.286	9.984	26.71
Nitab4.5_0001227g0020.1	3.23734	6.58036	1.6039e-38	5.64827e-36	15.342	22.037	21.669	222.461	160.146	169.997
Nitab4.5_0003654g0010.1	3.22639	2.35779	8.72618e-07	1.03036e-05	0.824	0.584	0.751	6.007	9.244	7.036
Nitab4.5_0000386g0050.1	3.21416	5.61966	2.43361e-16	1.13079e-14	13.664	8.379	8.171	134.073	86.841	62.361
Nitab4.5_0001864g0040.1	3.20785	4.94579	1.40227e-42	7.4073e-40	6.268	6.428	6.018	61.119	58.525	55.829
Nitab4.5_0003141g0010.1	3.20468	1.99687	0.000221748	0.0014982	0.392	0	0.501	5.852	6.611	3.753
Nitab4.5_0002543g0050.1	3.20211	5.7403	2.86309e-18	1.59641e-16	9.731	10.37	13.628	113.287	64.397	129.394
Nitab4.5_0000777g0080.1	3.19971	4.27964	1.07564e-20	7.41971e-19	3.718	3.07	4.866	44.182	35.386	28.458
Nitab4.5_0003838g0020.1	3.17055	2.32232	1.63222e-06	1.81415e-05	0.853	0.792	0.861	7.342	5.972	8.549
Nitab4.5_0001454g0130.1	3.17048	3.64804	5.70428e-16	2.50551e-14	2.923	1.515	2.874	18.963	20.517	27.875
Nitab4.5_0000636g0120.1	3.15763	7.9434	4.9653e-20	3.21511e-18	41.817	37.497	78.924	569.175	390.124	453.199
Nitab4.5_0001599g0170.1	3.14798	3.74952	4.90417e-14	1.73925e-12	2.178	3.744	2.513	32.633	20.864	18.722
Nitab4.5_0001925g0100.1	3.14265	4.46094	5.99033e-25	6.39595e-23	6.896	4.675	2.423	42.621	34.568	45.634
Nitab4.5_0001315g0120.1	3.14063	5.03861	2.65397e-26	3.04418e-24	8.946	5.566	6.649	56.959	76.163	53.14
Nitab4.5_0002322g0090.1	3.13003	4.76812	1.63107e-34	4.14436e-32	4.601	5.408	8.251	52.013	55.276	46.093
Nitab4.5_0000040g0460.1	3.12656	6.40591	5.01789e-11	1.1991e-09	18.648	19.59	17.273	182.105	70.762	233.109
Nitab4.5_0001598g0050.1	3.1249	3.18107	1.67406e-11	4.23218e-10	1.02	2.04	2.233	16.519	14.869	14.408
Nitab4.5_0001380g0020.1	3.10229	2.78605	9.4371e-09	1.5852e-07	0.687	1.783	1.802	8.677	14.365	9.871
Nitab4.5_0000222g0030.1	3.10126	2.9865	5.24262e-09	9.21498e-08	1.677	0.822	2.213	17.437	8.191	13.534
Nitab4.5_0001315g0070.1	3.09002	3.70449	9.94718e-13	3.01161e-11	2.207	1.991	3.455	19.451	31.375	18.184
Nitab4.5_0000033g0460.1	3.07685	4.0917	6.20438e-18	3.30346e-16	4.689	3.882	2.874	32.347	37.09	23.562
Nitab4.5_0001194g0010.1	3.06375	2.52685	1.00453e-05	9.47873e-05	0.824	0.515	1.142	14.636	5.961	5.96
Nitab4.5_0004131g0030.1	3.05945	2.5263	4.20484e-07	5.24899e-06	0.863	0.951	1.462	10.751	6.846	8.907
Nitab4.5_0001329g0110.1	3.04451	5.87792	2.84339e-08	4.40736e-07	14.842	10.498	14.89	132.118	40.429	161.662
Nitab4.5_0005061g0010.1	3.04215	5.80016	2.00773e-36	6.01511e-34	13.498	11.221	13.258	124.752	89.631	101.945
Nitab4.5_0001942g0160.1	3.03809	1.90317	0.000729871	0.00422454	0.314	0.465	0.661	5.506	4.348	4.605
Nitab4.5_0001204g0100.1	3.01881	7.1927	5.87664e-21	4.11017e-19	20.237	51.145	30.851	292.245	264.322	275.001
Nitab4.5_0003380g0040.1	3.01281	5.69231	1.24443e-31	2.5752e-29	11.663	9.478	15.4	117.148	90.528	85.374
Nitab4.5_0003122g0050.1	3.00985	4.60776	5.79649e-21	4.09694e-19	4.885	4.298	7.21	56.184	36.63	43.527
Nitab4.5_0001968g0020.1	3.00902	6.14726	2.06667e-35	5.68278e-33	15.312	15.956	18.615	143.93	109.039	148.912
Nitab4.5_0001569g0140.1	3.00405	1.45245	0.0117257	0.0439863	0.245	0.436	0.18	3.48	1.345	2.23
Nitab4.5_0001510g0070.1	3.00405	1.45214	0.0117257	0.0439863	0.971	0.327	0.33	2.944	2.196	2.723
Nitab4.5_0001288g0110.1	3.00405	1.45238	0.0117257	0.0439863	0.049	0.149	0.441	3.719	2.779	1.748
Nitab4.5_0000227g0150.1	2.99371	2.20929	0.000602377	0.00356998	0.275	0.624	1.362	10.214	2.958	6.509
Nitab4.5_0000106g0040.1	2.98876	2.20837	1.05302e-05	9.87262e-05	0.647	1.456	0.2	7.509	4.706	6.924
Nitab4.5_0000155g0200.1	2.98513	6.26442	6.29569e-36	1.81778e-33	16.333	17.174	20.858	162.058	118.216	154.794
Nitab4.5_0003463g0070.1	2.97887	6.36565	2.6864e-21	1.96804e-19	20.668	20.69	17.203	206.097	107.47	153.584
Nitab4.5_0004010g0070.1	2.97149	6.3948	4.03079e-20	2.64412e-18	17.49	23.8	19.676	178.16	104.646	192.977
Nitab4.5_0001735g0040.1	2.96107	2.46099	1.40926e-06	1.58832e-05	1.599	0.584	0.641	8.689	5.816	9.31
Nitab4.5_0000555g0140.1	2.95207	1.85426	0.00481786	0.0211358	0.628	0.248	0.891	7.819	2.353	2.857
Nitab4.5_0009795g0020.1	2.94308	7.1235	4.55145e-13	1.42975e-11	33.724	38.814	29.99	237.431	150.454	398.647
Nitab4.5_0003716g0110.1	2.93704	6.9834	2.71371e-24	2.61886e-22	21.306	28.484	43.327	264.32	196.788	253.019
Nitab4.5_0001198g0160.1	2.93149	3.57326	1.25362e-06	1.42977e-05	2.668	3.001	2.403	30.047	8.471	24.458
Nitab4.5_0000440g0200.1	2.92527	3.5724	1.53225e-10	3.44036e-09	2.305	3.011	2.884	25.863	13.032	23.013
Nitab4.5_0002753g0010.1	2.92349	3.03104	4.84638e-08	7.16357e-07	1.619	2.179	1.192	19.094	13.043	8.358
Nitab4.5_0000410g0050.1	2.92193	3.03062	1.84996e-09	3.53323e-08	1.589	2.298	1.312	16.579	13.525	10.565
Nitab4.5_0000751g0070.1	2.91498	3.18029	3.03266e-11	7.42373e-10	0.775	3.853	1.732	14.064	12.337	18.195
Nitab4.5_0000406g0070.1	2.91308	7.2612	1.57888e-54	1.58465e-51	37.687	38.805	38.17	278.348	264.938	319.895
Nitab4.5_0001047g0010.1	2.90924	2.42687	2.56967e-06	2.74513e-05	0.902	1.179	1.011	8.307	8.886	7.159
Nitab4.5_0000222g0050.1	2.90215	2.83979	2.13817e-05	0.000187749	1.207	1.426	1.172	15.53	3.933	14.912
Nitab4.5_0002208g0070.1	2.9007	2.64762	1.87217e-07	2.49536e-06	1.314	0.565	1.142	11.454	6.51	10.778
Nitab4.5_0002827g0080.1	2.89793	6.97072	2.07086e-11	5.19604e-10	26.417	21.027	46.832	296.75	138.184	271.203
Nitab4.5_0000718g0090.1	2.86741	4.00306	9.53125e-10	1.90558e-08	3.953	4.13	3.525	43.42	19.071	24.447
Nitab4.5_0000129g0050.1	2.85828	2.98445	5.88377e-09	1.02079e-07	1.991	1.268	1.732	12.908	12.315	13.646
Nitab4.5_0000223g0290.1	2.85675	2.61688	6.08176e-07	7.38084e-06	1.138	1.515	0.411	7.64	10.432	10.296
Nitab4.5_0000058g0290.1	2.85596	2.12743	0.00026713	0.00176385	0.922	0.673	0.881	5.459	2.846	9.535
Nitab4.5_0000223g0100.1	2.85345	2.12709	3.5994e-05	0.000300669	1.246	1.03	0.19	7.056	5.423	4.863
Nitab4.5_0001014g0010.1	2.85344	2.12708	3.5994e-05	0.000300669	0.51	0.574	0.591	6.925	6.017	4.459
Nitab4.5_0001287g0110.1	2.84971	1.80243	0.00235289	0.011483	0	0.525	0.581	4.303	4.056	3.372
Nitab4.5_0003283g0030.1	2.84971	1.80187	0.00235289	0.011483	0.971	0	0.821	2.849	5.793	3.025
Nitab4.5_0000855g0150.1	2.8366	9.14768	2.82284e-67	7.08285e-64	145.06	154.822	145.943	1187.89	1026.56	956.503
Nitab4.5_0000039g0010.1	2.8347	6.4819	7.58202e-26	8.55021e-24	23.346	27.702	19.646	166.575	205.08	127.759
Nitab4.5_0000622g0170.1	2.82383	10.0621	1.68492e-34	4.22769e-32	205.545	302.305	336.695	2080.78	1998.86	1883.75
Nitab4.5_0002980g0080.1	2.82084	3.49099	3.57729e-08	5.42348e-07	3.934	1.832	1.943	19.165	11.127	28.077
Nitab4.5_0003317g0010.1	2.81927	4.62128	3.42312e-06	3.55653e-05	7.386	5.913	5.798	26.376	83.961	23.315
Nitab4.5_0000160g0130.1	2.81144	2.58718	1.09164e-06	1.26006e-05	1.236	1.089	0.451	10.608	9.11	6.924
Nitab4.5_0000410g0140.1	2.80127	7.01395	1.43172e-13	4.80586e-12	26.407	21.136	55.874	273.521	211.444	236.426
Nitab4.5_0000976g0040.1	2.80123	2.35821	2.19128e-05	0.000191909	1.02	0.812	1.422	10.405	4.605	6.98
Nitab4.5_0003299g0010.1	2.79964	2.35759	8.46862e-06	8.15303e-05	0.873	0.604	1.091	8.593	6.544	6.397
Nitab4.5_0001533g0010.1	2.79963	2.35712	8.46862e-06	8.15303e-05	0.353	1.793	1.522	8.224	9.693	4.078
Nitab4.5_0000534g0090.1	2.79896	3.58633	2.68186e-07	3.47309e-06	1.226	0.357	7.33	24.505	20.539	17.646
Nitab4.5_0000195g0080.1	2.79815	4.17653	3.48719e-18	1.91776e-16	2.953	7.151	3.645	34.421	26.086	36.099
Nitab4.5_0001027g0180.1	2.78527	2.08522	0.00334449	0.01558	0.647	0.703	0.961	5.208	1.445	9.624
Nitab4.5_0002629g0040.1	2.77947	7.42673	5.07336e-05	0.00040784	55.011	48.372	37.049	495.327	66.862	397.908
Nitab4.5_0002334g0100.1	2.76581	6.7761	2.04158e-31	4.09806e-29	19.599	35.398	34.456	222.736	199.634	187.722
Nitab4.5_0000168g0120.1	2.76389	10.8342	1.97414e-43	1.10075e-40	412.914	512.928	571.275	3682.59	3510.48	2938.65
Nitab4.5_0000082g0210.1	2.76027	7.55038	4.63703e-16	2.08698e-14	29.094	72.994	52.039	381.635	301.927	358.056
Nitab4.5_0000558g0010.1	2.75793	5.00996	5.57867e-13	1.73883e-11	11.624	5.358	9.102	83.013	45.931	48.166
Nitab4.5_0002231g0100.1	2.74542	1.74946	0.0041855	0.0187954	0.628	0.475	0.26	3.874	2.241	4.93
Nitab4.5_0008288g0010.1	2.74542	1.74919	0.0041855	0.0187954	0.255	1.179	0.31	4.183	4.874	1.961
Nitab4.5_0001645g0020.1	2.74541	1.74881	0.0041855	0.0187954	1.079	0.614	0.34	1.943	5.468	3.955
Nitab4.5_0000026g0230.1	2.74404	6.01652	1.12938e-46	7.81725e-44	19.138	15.451	18.565	114.86	117.308	126.952
Nitab4.5_0000700g0080.1	2.74009	2.73189	2.52125e-07	3.28417e-06	1.442	1.634	1.252	11.907	8.695	10.028
Nitab4.5_0004741g0010.1	2.73733	7.97328	5.05925e-22	3.89097e-20	70.657	70.686	68.44	565.802	306.846	521.88
Nitab4.5_0000923g0050.1	2.73423	6.61377	2.41775e-50	2.11007e-47	25.681	32.813	23.151	189.375	176.248	176.653
Nitab4.5_0000123g0350.1	2.73385	3.98467	1.56022e-06	1.74184e-05	3.002	4.219	4.927	19.868	47.499	15.417
Nitab4.5_0000955g0060.1	2.72982	3.18059	5.73376e-07	6.99658e-06	1.825	1.931	2.423	18.927	7.295	18.587
Nitab4.5_0000726g0070.1	2.72873	3.42313	1.28695e-10	2.91568e-09	3.404	1.921	2.313	24.386	14.791	15.585
Nitab4.5_0000636g0070.1	2.72852	5.32897	2.0572e-06	2.24059e-05	9.809	5.398	18.064	124.097	46.872	50.956
Nitab4.5_0000410g0380.1	2.71885	8.9026	6.3391e-36	1.81778e-33	129.611	131.894	141.948	890.43	699.749	1053.95
Nitab4.5_0001334g0020.1	2.71672	5.15696	5.0209e-10	1.0444e-08	7.21	10.895	11.275	95.278	36.776	64.12
Nitab4.5_0000649g0090.1	2.71624	5.12326	3.55019e-10	7.56508e-09	6.837	10.766	11.796	72.346	34.602	84.142
Nitab4.5_0000615g0060.1	2.712	2.04187	0.0090749	0.0355991	0.687	0.634	0.831	6.734	0.594	9.053
Nitab4.5_0000610g0290.1	2.71165	4.47381	2.02408e-24	1.9723e-22	4.522	5.081	8.431	42.025	41.897	35.55
Nitab4.5_0000119g0140.1	2.70411	2.04144	0.000221748	0.0014982	0.471	0.862	0.471	6.436	3.227	6.095
Nitab4.5_0004361g0070.1	2.69936	4.96316	6.76903e-23	5.73311e-21	10.81	6.497	8.491	46.256	62.503	60.344
Nitab4.5_0002207g0040.1	2.69058	3.27827	2.56774e-07	3.33211e-06	1.354	3.447	2.383	16.972	9.177	21.758
Nitab4.5_0002526g0030.1	2.68102	2.28405	2.75449e-05	0.000236084	1.246	0.881	0.821	7.711	7.989	3.977
Nitab4.5_0003780g0010.1	2.67997	5.22928	6.20774e-08	9.01649e-07	13.91	8.627	9.713	53.145	114.182	37.029
Nitab4.5_0000356g0010.1	2.67507	7.14964	3.28599e-13	1.05874e-11	46.683	32.902	43.848	354.615	280.716	148.8
Nitab4.5_0000022g0200.1	2.67178	4.38546	1.37302e-22	1.12492e-20	4.748	5.903	6.649	33.837	41.224	35.371
Nitab4.5_0004979g0140.1	2.66942	4.00697	3.04544e-06	3.20562e-05	4.041	5.527	2.814	17.759	48.698	17.321
Nitab4.5_0000805g0080.1	2.66776	3.13824	7.80293e-10	1.59013e-08	1.442	2.318	3.124	16.853	12.841	12.974
Nitab4.5_0000303g0190.1	2.65867	8.27479	7.82663e-23	6.57338e-21	59.984	107.708	102.926	655.215	529.339	519.034
Nitab4.5_0002664g0010.1	2.65609	6.49587	2.07893e-32	4.48713e-30	24.013	22.314	32.944	191.604	145.68	159.858
Nitab4.5_0000008g0370.1	2.64343	2.98451	9.71026e-08	1.36304e-06	1.324	2.001	2.453	17.258	9.446	11.574
Nitab4.5_0000391g0220.1	2.64117	4.66413	4.64607e-20	3.01814e-18	7.004	7.725	6.809	49.629	35.241	51.247
Nitab4.5_0000108g0020.1	2.63094	4.56206	3.75113e-19	2.26115e-17	6.072	6.091	8.481	41.298	50.043	34.43
Nitab4.5_0002052g0080.1	2.63045	7.59772	9.82044e-45	6.35889e-42	50.047	54.077	67.79	334.592	351.802	376.721
Nitab4.5_0001756g0170.1	2.62737	6.89117	9.45009e-44	5.57917e-41	28.781	35.269	41.275	212.938	232.051	206.063
Nitab4.5_0000045g0480.1	2.62696	5.47476	5.0569e-06	5.08808e-05	15.165	12.479	11.896	37.079	150.342	53.443
Nitab4.5_0002826g0080.1	2.6243	3.73127	3.08311e-10	6.60114e-09	3.973	4.487	2.443	29.236	24.327	15.002
Nitab4.5_0001377g0040.1	2.62321	1.9957	0.000403247	0.00253587	0.432	0.238	1.372	3.933	7.127	4.314
Nitab4.5_0000312g0090.1	2.6224	7.10476	6.5698e-20	4.18653e-18	45.368	40.617	36.658	236.371	334.983	182.635
Nitab4.5_0001478g0110.1	2.61707	5.70129	1.31626e-26	1.5451e-24	16.813	18.59	11.045	108.722	79.647	95.693
Nitab4.5_0000278g0050.1	2.61446	4.34004	2.19535e-21	1.61419e-19	4.973	6.111	6.689	35.208	36.753	35.304
Nitab4.5_0000264g0050.1	2.60595	3.43833	1.7416e-11	4.39185e-10	2.756	2.714	2.894	15.864	17.76	19.54
Nitab4.5_0001279g0130.1	2.60586	3.63036	1.2623e-05	0.00011623	2.109	3.991	3.565	30.691	24.797	7.787
Nitab4.5_0000309g0170.1	2.60228	3.53569	4.68771e-09	8.27584e-08	2.933	4.417	2.533	15.172	26.938	15.361
Nitab4.5_0000273g0080.1	2.59361	6.05293	2.95172e-29	4.5229e-27	17.274	20.264	22.4	108.436	143.148	110.124
Nitab4.5_0000704g0080.1	2.59296	7.4523	4.05067e-13	1.28248e-11	42.68	55.701	61.171	295.678	203.668	456.998
Nitab4.5_0001591g0020.1	2.58505	6.87309	1.98659e-11	4.99085e-10	33.46	42.222	31.732	296.095	231.547	114.347
Nitab4.5_0004979g0130.1	2.58399	4.90873	4.49739e-06	4.57558e-05	9.26	12.806	3.995	37.115	91.323	32.368
Nitab4.5_0000354g0170.1	2.58115	3.31433	2.29177e-10	5.01118e-09	1.805	2.011	4.386	15.423	15.676	18.162
Nitab4.5_0004038g0010.1	2.57337	4.60969	3.14835e-25	3.41605e-23	6.111	8.23	8.241	47.913	42.166	39.976
Nitab4.5_0000241g0060.1	2.57145	3.85141	2.45027e-09	4.56678e-08	5.062	3.813	3.314	31.823	27.946	14.688
Nitab4.5_0000965g0090.1	2.5698	5.96218	7.08381e-30	1.16377e-27	15.999	20.64	20.397	119.02	126.519	93.777
Nitab4.5_0002005g0020.1	2.5668	6.21991	7.6872e-12	2.03598e-10	26.878	19.412	22.5	183.666	76.375	146.749
Nitab4.5_0001952g0160.1	2.56535	7.78304	2.01304e-16	9.46315e-15	39.522	84.334	78.804	403.649	449.725	346.908
Nitab4.5_0001200g0140.1	2.56045	4.05536	7.08425e-17	3.51117e-15	5.071	4.714	4.085	26.745	25.1	33.847
Nitab4.5_0001757g0030.1	2.55177	2.20728	8.82523e-05	0.000668739	0.893	0.99	1.192	5.065	5.446	7.798
Nitab4.5_0001858g0020.1	2.55101	3.17814	1.73854e-09	3.3459e-08	2.992	0.881	3.344	14.386	15.62	13.478
Nitab4.5_0005090g0040.1	2.54064	5.23351	7.13113e-30	1.16377e-27	9.574	11.915	13.648	69.593	60.049	72.792
Nitab4.5_0000208g0350.1	2.53859	4.62588	1.69063e-10	3.75814e-09	6.072	6.16	9.793	61.405	41.639	28.212
Nitab4.5_0000329g0120.1	2.53642	3.82456	1.67706e-14	6.30405e-13	4.463	3.912	4.546	20.417	25.458	25.579
Nitab4.5_0000109g0250.1	2.5358	9.29203	3.81293e-12	1.04274e-10	125.069	178.82	284.936	1284.67	839.211	1280.64
Nitab4.5_0001103g0090.1	2.5347	7.35404	6.14383e-34	1.50397e-31	62.76	41.132	50.046	334.199	272.435	283.045
Nitab4.5_0001814g0020.1	2.53097	2.75807	9.50757e-07	1.1154e-05	1.118	1.743	2.133	10.381	9.995	9.243
Nitab4.5_0001780g0020.1	2.52729	10.0663	3.41922e-32	7.30149e-30	309.416	305.445	398.066	2337.44	1785.26	1697.44
Nitab4.5_0000037g0140.1	2.52	2.58664	7.47058e-06	7.26888e-05	1.53	1.238	1.242	11.537	7.956	7.271
Nitab4.5_0002859g0070.1	2.51313	5.65888	5.64821e-27	6.99855e-25	15.558	14.945	16.842	99.628	73.933	99.659
Nitab4.5_0003688g0080.1	2.51106	1.63695	0.0129492	0.0476236	0.569	0.99	0	2.074	3.115	4.762
Nitab4.5_0002337g0010.1	2.50832	7.75231	5.82916e-21	4.10557e-19	55.491	90.207	60.39	450.799	412.087	306.517
Nitab4.5_0001453g0040.1	2.50529	7.15135	2.40301e-23	2.17277e-21	37.001	48.402	50.597	220.209	229.059	319.76
Nitab4.5_0000277g0010.1	2.50484	2.3919	3.40951e-05	0.000286117	0.873	1.505	1.182	7.676	5.95	8
Nitab4.5_0003011g0040.1	2.50484	2.39197	3.40951e-05	0.000286117	0.755	0.961	2.053	8.51	5.715	7.91
Nitab4.5_0001204g0110.1	2.50484	2.39162	3.40951e-05	0.000286117	0.716	0.881	2.113	6.579	6.6	8.448
Nitab4.5_0000663g0020.1	2.50305	2.8871	3.66019e-07	4.61791e-06	1.638	1.496	2.643	12.383	12.64	8.257
Nitab4.5_0000363g0100.1	2.50184	6.26909	1.99443e-25	2.19968e-23	24.876	23.79	25.594	164.68	108.277	143.5
Nitab4.5_0002577g0030.1	2.49736	8.11664	5.10458e-31	9.5761e-29	69.038	99.557	97.559	574.264	448.044	480.335
Nitab4.5_0000209g0290.1	2.487	3.35042	3.4038e-08	5.1761e-07	4.12	2.951	1.612	15.399	11.586	22.117
Nitab4.5_0000662g0120.1	2.48426	3.53833	1.10531e-07	1.53366e-06	1.805	3.348	4.055	25.22	10.735	21.848
Nitab4.5_0000915g0070.1	2.48253	2.16737	0.000156964	0.00110747	0.853	0.654	1.422	5.316	3.843	7.82
Nitab4.5_0002139g0090.1	2.48253	2.16733	0.000156964	0.00110747	0.618	0.812	1.262	6.353	5.255	6.308
Nitab4.5_0002076g0070.1	2.47936	7.97852	1.70321e-31	3.45338e-29	76.758	77.302	91.331	551.905	388.981	423.318
Nitab4.5_0000101g0080.1	2.46669	5.05088	1.81825e-21	1.35177e-19	11.153	9.865	10.794	61.739	47.779	67.717
Nitab4.5_0001536g0060.1	2.46299	4.27447	1.30358e-10	2.95003e-09	5.68	3.625	8.762	45.696	27.251	28.043
Nitab4.5_0000258g0320.1	2.4614	2.55373	0.00187367	0.00950234	0.746	2.694	0.771	4.1	15.015	5.557
Nitab4.5_0001892g0130.1	2.4579	4.16145	1.14014e-09	2.24814e-08	4.64	5.22	7.51	32.931	39.566	18.912
Nitab4.5_0000036g0180.1	2.4464	1.90172	0.00131423	0.00700343	0.392	0.604	0.601	3.862	4.74	4.426
Nitab4.5_0000066g0040.1	2.44259	1.90129	0.0112175	0.0424929	0.432	0.842	0.751	3.564	7.754	1.58
Nitab4.5_0000583g0290.1	2.44249	5.06282	3.36648e-14	1.2132e-12	8.397	9.696	14.649	64.301	42.804	70.798
Nitab4.5_0000120g0010.1	2.4423	4.5924	3.34877e-23	2.97375e-21	7.357	6.17	9.142	44.254	42.715	40.065
Nitab4.5_0000404g0200.1	2.44167	5.83788	3.44939e-20	2.27762e-18	14.174	21.304	21.068	99.556	125.746	81.206
Nitab4.5_0002811g0030.1	2.44024	5.63893	6.94509e-15	2.71752e-13	20.364	15.431	13.648	119.902	82.236	65.196
Nitab4.5_0004554g0020.1	2.43776	4.96268	1.02939e-19	6.45716e-18	8.436	13.083	8.882	60.487	44.16	60.49
Nitab4.5_0001822g0090.1	2.42778	2.83647	1.08026e-06	1.24948e-05	1.481	1.674	2.664	10.703	11.026	10.397
Nitab4.5_0001507g0100.1	2.42728	5.47526	2.91322e-13	9.40147e-12	12.919	16.372	14.519	104.967	51.914	81.329
Nitab4.5_0000295g0090.1	2.42476	5.91133	1.39149e-27	1.83759e-25	20.894	15.371	24.262	122.655	106.002	93.329
Nitab4.5_0000888g0030.1	2.41974	5.80143	4.51377e-15	1.79416e-13	12.919	17.58	25.183	107.971	74.045	116.006
Nitab4.5_0001706g0010.1	2.41926	4.53025	3.35632e-12	9.25431e-11	6.592	7.24	9.022	43.741	26.826	49.387
Nitab4.5_0000793g0040.1	2.41755	3.65795	3.28168e-12	9.07344e-11	3.443	4.229	3.875	22.884	22.5	17.691
Nitab4.5_0000869g0170.1	2.41546	3.94832	7.74096e-05	0.000593599	4.395	1.565	8.411	26.65	38.109	12.795
Nitab4.5_0000540g0010.1	2.41337	3.48817	1.23233e-10	2.8046e-09	3.953	3.09	3.655	22.228	16.27	16.47
Nitab4.5_0000528g0010.1	2.41143	2.12637	0.0017086	0.00875811	0.5	0.436	1.202	4.66	2.958	9.187
Nitab4.5_0000342g0270.1	2.40994	3.93872	2.68685e-11	6.62569e-10	5.758	4.358	4.206	31.012	17.839	29.422
Nitab4.5_0002266g0120.1	2.40979	2.1263	0.000489382	0.00298039	0.922	0.594	1.202	6.46	4.28	6.285
Nitab4.5_0000602g0060.1	2.40777	2.95778	4.21297e-05	0.000345187	2.295	2.08	2.443	9.988	18.69	6.834
Nitab4.5_0002869g0010.1	2.40486	5.69305	8.66203e-30	1.37994e-27	16.264	15.223	19.926	88.889	83.48	103.11
Nitab4.5_0000306g0030.1	2.39863	2.81238	0.00186479	0.00946397	1.295	1.149	2.674	15.876	2.712	13.243
Nitab4.5_0000022g0210.1	2.39464	6.04889	1.11933e-15	4.74014e-14	25.357	12.341	29.489	132.809	121.992	98.415
Nitab4.5_0001712g0010.1	2.3865	3.55302	4.92064e-05	0.000397313	1.677	5.081	4.656	18.116	9.211	30.06
Nitab4.5_0000856g0010.1	2.38623	2.32078	0.000104076	0.000772891	0	1.733	1.842	6.77	4.202	8.818
Nitab4.5_0001450g0030.1	2.38623	2.32019	0.000104076	0.000772891	1.511	1.03	1.432	7.556	6.914	5.916
Nitab4.5_0001196g0100.1	2.3856	3.1759	1.83836e-06	2.02867e-05	1.893	3.348	1.923	10.369	21.156	10.341
Nitab4.5_0002093g0010.1	2.38054	5.07252	1.14844e-12	3.43045e-11	11.722	10.251	12.667	57.162	41.437	78.652
Nitab4.5_0000511g0120.1	2.37094	3.97381	3.85939e-13	1.22773e-11	5.17	5.2	5.057	27.675	20.607	31.181
Nitab4.5_0000016g0170.1	2.36865	5.89981	1.51828e-18	8.75758e-17	16.951	18.739	25.714	118.972	119.46	79.111
Nitab4.5_0000643g0240.1	2.36801	4.7326	1.39285e-24	1.42366e-22	7.818	7.636	11.015	50.475	43.858	43.852
Nitab4.5_0000578g0170.1	2.36709	5.17971	5.65522e-09	9.87106e-08	12.546	10.162	14.81	39.618	94.987	55.852
Nitab4.5_0000040g0270.1	2.36705	3.45331	8.67473e-09	1.46943e-07	4.836	3.645	1.732	20.25	20.898	11.82
Nitab4.5_0000249g0100.1	2.36145	2.64572	8.12477e-05	0.000620109	3.267	0.574	0.931	11.859	4.729	10.072
Nitab4.5_0004881g0040.1	2.36055	2.64584	0.000228078	0.00153528	1.344	1.644	2.123	9.356	4.224	13.512
Nitab4.5_0000051g0190.1	2.35541	7.23732	1.5433e-24	1.53359e-22	53.52	50.987	53.971	315.177	204.598	284.233
Nitab4.5_0000901g0050.1	2.3509	6.90151	5.16599e-42	2.41156e-39	39.61	41.875	43.818	225.739	193.684	217.323
Nitab4.5_0004057g0050.1	2.34957	3.35034	3.63625e-08	5.49213e-07	1.736	5.012	3.074	18.915	11.026	18.643
Nitab4.5_0000856g0190.1	2.34914	1.85286	0.00235289	0.011483	0.785	1.04	0.941	6.686	3.037	2.521
Nitab4.5_0003180g0060.1	2.34914	1.85247	0.00235289	0.011483	0.971	0.673	0.491	5.113	5.266	1.681
Nitab4.5_0000721g0250.1	2.34913	1.85222	0.0075462	0.0305886	0.893	0	1.121	2.598	5.289	4.414
Nitab4.5_0001772g0020.1	2.34835	2.78333	3.14532e-06	3.29691e-05	2.678	2.001	0.911	9.583	12.92	8.179
Nitab4.5_0001492g0060.1	2.34622	4.78772	7.09304e-25	7.49361e-23	6.798	12.212	9.523	51.715	45.09	47.314
Nitab4.5_0000091g0420.1	2.34528	6.96976	7.99602e-30	1.28403e-27	41.905	43.073	46.111	258.873	225.036	183.89
Nitab4.5_0002234g0110.1	2.33748	2.08448	0.00176417	0.00901074	0.481	1.159	0.621	9.463	2.745	4.694
Nitab4.5_0002469g0090.1	2.33499	3.02703	1.40041e-07	1.91243e-06	1.599	2.585	2.834	10.095	14.869	12.425
Nitab4.5_0000014g0030.1	2.33389	4.22483	6.30012e-08	9.14406e-07	6.71	5.091	7.59	44.23	17.839	33.813
Nitab4.5_0001005g0050.1	2.33375	6.209	9.51771e-10	1.90478e-08	35.49	15.46	27.406	181.271	93.71	118.963
Nitab4.5_0000558g0030.1	2.3332	2.08328	0.000915555	0.00513637	1.844	0.901	0.33	6.424	6.398	2.891
Nitab4.5_0000343g0280.1	2.33238	6.91138	9.12835e-20	5.76206e-18	33.42	46.104	47.723	256.299	164.83	219.541
Nitab4.5_0000786g0040.1	2.32325	6.35533	3.57649e-15	1.44448e-13	16.176	37.319	33.634	160.449	136.481	136.991
Nitab4.5_0005919g0010.1	2.32013	5.75505	2.07215e-30	3.55506e-28	18.589	17.481	21.178	98.508	103.683	83.637
Nitab4.5_0000629g0040.1	2.31921	4.26874	2.50278e-07	3.26647e-06	5.64	7.874	5.698	29.737	49.505	18.923
Nitab4.5_0000224g0070.1	2.31603	2.45876	6.64651e-05	0.000518118	0.598	2.417	1.522	7.902	7.956	6.655
Nitab4.5_0001332g0130.1	2.31182	4.5307	0.000416963	0.00260901	4.865	6.824	12.456	42.144	13.088	64.075
Nitab4.5_0000718g0130.1	2.31093	3.00675	0.000505439	0.00306608	1.972	2.803	2.023	19.332	4.415	14.285
Nitab4.5_0000082g0170.1	2.30696	2.75794	5.37672e-06	5.37485e-05	1.265	2.278	1.842	13.885	6.981	9.759
Nitab4.5_0000118g0120.1	2.30241	2.45712	0.00809813	0.0323361	1.079	1.902	1.292	4.124	14.982	2.554
Nitab4.5_0000798g0140.1	2.29924	3.11474	5.3362e-08	7.81281e-07	2.629	2.664	1.903	15.768	13.48	11.294
Nitab4.5_0003579g0010.1	2.29855	7.77046	1.1645e-43	6.67855e-41	68.92	89.118	77.853	405.401	366.66	383.197
Nitab4.5_0000081g0200.1	2.2943	6.06951	2.27183e-35	6.1625e-33	21.021	27.484	23.992	116.6	111.818	125.574
Nitab4.5_0000605g0080.1	2.29176	3.64203	3.10246e-11	7.57612e-10	2.56	4.487	4.916	18.51	23.24	18.923
Nitab4.5_0000733g0180.1	2.28811	4.03058	1.13535e-14	4.34921e-13	4.738	6.061	5.577	28.974	24.988	28.749
Nitab4.5_0000067g0120.1	2.28631	6.69372	3.74509e-07	4.71614e-06	29.703	35.922	46.702	163.691	289.669	92.903
Nitab4.5_0000021g0660.1	2.28613	4.4271	1.61446e-16	7.71596e-15	7.681	6.695	7.63	38.366	29.302	41.925
Nitab4.5_0000469g0140.1	2.2839	5.77806	6.18787e-13	1.92274e-11	17.186	21.75	20.197	97.006	64.89	126.302
Nitab4.5_0003030g0040.1	2.26879	6.06306	9.37027e-29	1.36297e-26	21.541	25.137	26.014	126.802	124.682	99.894
Nitab4.5_0000590g0020.1	2.26809	4.32537	4.43757e-09	7.8758e-08	5.042	6.963	8.561	28.462	47.208	25.164
Nitab4.5_0000421g0040.1	2.26766	4.53701	1.57534e-08	2.53583e-07	8.103	5.348	11.816	45.72	24.876	48.816
Nitab4.5_0001662g0020.1	2.26762	3.54955	1.45419e-05	0.00013232	3.433	5.715	2.393	19.892	27.162	9.12
Nitab4.5_0004156g0010.1	2.26664	2.73073	6.12972e-05	0.000483086	1.746	1.466	3.124	12.324	4.93	11.439
Nitab4.5_0000368g0110.1	2.26648	4.32001	1.74659e-08	2.79643e-07	7.249	6.467	6.999	39.987	19.531	42.765
Nitab4.5_0000291g0010.1	2.26431	2.73008	9.0233e-06	8.63321e-05	2.207	1.733	1.872	13.039	8.695	7.652
Nitab4.5_0002853g0060.1	2.26353	2.42603	0.000467763	0.00287489	1.403	1.674	1.182	10.631	3.518	8.123
Nitab4.5_0000668g0090.1	2.26155	4.17211	1.73226e-12	5.01033e-11	6.504	5.695	6.709	37.651	23.229	30.06
Nitab4.5_0000069g0240.1	2.25915	5.24278	4.86123e-07	6.00489e-06	13.802	12.034	14.87	85.516	29.761	82.203
Nitab4.5_0000723g0200.1	2.25795	4.00793	7.11973e-11	1.67543e-09	4.62	4.12	7.991	27.258	20.091	32.85
Nitab4.5_0001332g0120.1	2.25698	2.24593	0.000311631	0.00201591	0.706	0.971	2.523	7.842	3.709	6.644
Nitab4.5_0000512g0170.1	2.25697	2.24499	0.000311631	0.00201591	0.912	1.872	0.941	7.401	7.463	3.428
Nitab4.5_0001307g0070.1	2.25697	2.24488	0.000311631	0.00201591	2.207	0	1.592	5.506	6.488	6.453
Nitab4.5_0004300g0180.1	2.25556	4.11091	7.89043e-05	0.000603572	5.464	5.2	7.159	44.635	10.578	32.996
Nitab4.5_0002543g0070.1	2.25413	5.73797	9.70132e-24	9.01549e-22	13.076	21.472	24.052	99.628	83.446	97.127
Nitab4.5_0002465g0040.1	2.2523	2.04059	0.00149224	0.00780453	1.069	0.644	1.282	7.163	3.642	4.426
Nitab4.5_0004114g0030.1	2.25213	2.0398	0.00204693	0.010226	1.668	0.99	1.071	3.111	4.101	7.854
Nitab4.5_0000132g0260.1	2.24859	5.69728	1.20614e-32	2.66052e-30	19.53	15.708	21.538	96.124	90.819	84.422
Nitab4.5_0000123g0370.1	2.24791	6.86458	1.65084e-18	9.46778e-17	47.791	42.192	39.722	179.59	168.315	264.637
Nitab4.5_0000303g0050.1	2.24772	4.90589	8.9982e-10	1.80983e-08	11.045	8.696	12.877	60.213	31.599	63.381
Nitab4.5_0000305g0060.1	2.24606	4.67274	7.77286e-22	5.88772e-20	8.093	8.428	11.025	44.886	45.594	39.651
Nitab4.5_0002340g0030.1	2.24499	1.80165	0.013283	0.0486906	0.383	0.565	0.451	3.468	1.58	6.364
Nitab4.5_0002098g0010.1	2.24485	1.80176	0.0127377	0.0470524	0.51	1	0.851	4.744	1.838	5.299
Nitab4.5_0002386g0010.1	2.24441	3.36729	8.20604e-09	1.3983e-07	3.678	3.06	3.955	17.997	12.169	19.192
Nitab4.5_0000582g0180.1	2.23986	5.72563	6.02914e-30	1.00019e-27	19.795	16.797	22.61	86.243	88.735	100.88
Nitab4.5_0000368g0090.1	2.23559	3.07139	2.60148e-07	3.37335e-06	2.462	2.951	2.654	11.478	11.676	15.024
Nitab4.5_0000152g0350.1	2.2344	9.39959	2.47584e-35	6.53916e-33	247.499	289.836	220.091	1343.98	1082.46	1121.29
Nitab4.5_0001714g0130.1	2.23151	2.95851	6.93468e-07	8.34532e-06	2.011	2.763	2.153	14.636	10.667	9.154
Nitab4.5_0001988g0030.1	2.22826	5.14527	2.27477e-28	3.2156e-26	13.615	14.113	10.604	65.302	60.587	58.059
Nitab4.5_0000063g0120.1	2.22771	9.50242	1.35457e-22	1.11894e-20	264.587	270.671	280.3	1419.41	924.259	1459.82
Nitab4.5_0003856g0020.1	2.22655	2.8361	5.5823e-06	5.56373e-05	1.972	2.664	1.182	11.442	6.835	12.997
Nitab4.5_0000318g0110.1	2.22587	3.51893	1.16188e-09	2.28652e-08	3.757	3.684	4.045	17.842	16.349	20.716
Nitab4.5_0000104g0240.1	2.22127	6.68372	2.67347e-17	1.3586e-15	31.704	34.982	49.535	197.516	138.845	202.175
Nitab4.5_0000761g0090.1	2.22037	2.702	1.51918e-05	0.000137735	1.795	2.05	2.413	10.333	7.676	10.565
Nitab4.5_0000795g0070.1	2.22034	8.32686	6.74651e-31	1.25391e-28	95.013	126.377	140.626	580.974	550.293	552.097
Nitab4.5_0000824g0110.1	2.2191	5.99396	1.40937e-24	1.4288e-22	23.434	24.741	23.741	119.198	91.032	123.019
Nitab4.5_0000082g0410.1	2.21886	3.862	5.60335e-05	0.000447221	2.315	4.298	8.461	18.009	16.113	37.287
Nitab4.5_0001992g0100.1	2.21788	3.79648	1.24667e-11	3.21651e-10	4.473	5.18	5.287	21.465	18.915	27.954
Nitab4.5_0001160g0030.1	2.21501	4.08481	1.82705e-09	3.49279e-08	5.366	9.409	3.695	32.872	31.902	20.19
Nitab4.5_0000140g0110.1	2.21419	5.83908	1.60591e-30	2.77891e-28	16.068	24.77	24.022	105.242	99.111	93.788
Nitab4.5_0000704g0050.1	2.21006	3.58286	9.94209e-08	1.39168e-06	3.58	4.279	4.426	23.599	11.564	22.229
Nitab4.5_0000775g0030.1	2.20643	3.91073	1.94732e-12	5.59206e-11	5.13	5.239	6.068	24.135	27.509	22.923
Nitab4.5_0000207g0010.1	2.2042	7.42202	1.25965e-20	8.57116e-19	56.776	64.001	74.418	270.005	255.873	370.806
Nitab4.5_0000628g0140.1	2.20268	3.04917	4.38417e-07	5.44576e-06	2.766	2.08	2.814	12.276	12.393	11.831
Nitab4.5_0006037g0010.1	2.19902	3.96185	2.87067e-05	0.0002451	3.502	6.15	7.23	29.844	10.903	36.256
Nitab4.5_0000666g0100.1	2.19895	5.36002	2.75849e-13	8.94527e-12	13.174	14.321	18.915	89.497	51.063	73.218
Nitab4.5_0000072g0610.1	2.19794	3.41885	8.55971e-09	1.45486e-07	4.65	3.338	2.684	20.023	16.864	13.68
Nitab4.5_0000250g0190.1	2.19413	4.95592	4.08799e-09	7.28759e-08	10.221	12.965	11.235	53.682	72.913	32.469
Nitab4.5_0000052g0360.1	2.19365	7.03671	8.03544e-23	6.72064e-21	44.662	61.614	44.479	258.217	240.332	188.271
Nitab4.5_0000383g0080.1	2.18608	6.94468	2.97017e-16	1.37374e-14	45.162	49.947	46.562	272.71	151.395	219.978
Nitab4.5_0002055g0020.1	2.186	4.73033	2.07318e-12	5.90283e-11	7.308	13.509	8.421	55.636	44.978	35.091
Nitab4.5_0000363g0070.1	2.18544	6.74068	4.44156e-25	4.76767e-23	38.943	41.201	42.837	193.237	214.335	150.973
Nitab4.5_0000052g0160.1	2.18475	9.27923	1.35048e-51	1.29086e-48	216.668	250.843	248.538	1118.09	1086.83	1036.74
Nitab4.5_0002998g0050.1	2.17813	2.67425	0.000150434	0.00106777	2.001	1.694	2.403	13.504	5.401	8.683
Nitab4.5_0000233g0290.1	2.17805	3.13512	1.63725e-07	2.20419e-06	2.629	0.981	5.157	13.051	12.841	14.722
Nitab4.5_0001196g0130.1	2.1736	3.1333	1.74865e-05	0.000156142	3.865	2.922	2.443	9.38	20.741	10.767
Nitab4.5_0000319g0170.1	2.16817	1.99584	0.00395528	0.0178937	0.579	0.713	1.542	6.305	1.692	5.826
Nitab4.5_0001422g0010.1	2.1666	1.99548	0.00258074	0.0124199	0.844	1.337	0.621	6.198	3.137	4.235
Nitab4.5_0000172g2190.1	2.16546	3.31159	3.80364e-08	5.71485e-07	4.12	3.209	2.704	15.852	14.309	15.461
Nitab4.5_0001467g0140.1	2.16176	3.75494	9.46817e-08	1.33465e-06	5.493	4.665	4.556	27.294	25.75	13.411
Nitab4.5_0002605g0040.1	2.1613	4.7099	2.18581e-11	5.45292e-10	11.3	9.627	8.471	55.338	30.77	47.953
Nitab4.5_0004646g0070.1	2.15531	5.92967	7.64823e-12	2.03073e-10	16.695	23.215	31.381	109.342	76.252	129.742
Nitab4.5_0000725g0100.1	2.15525	3.68532	9.92286e-11	2.27636e-09	4.424	3.011	6.318	22.729	20.27	18.767
Nitab4.5_0002263g0020.1	2.15429	2.52264	0.00435812	0.0194358	1.001	0	4.226	8.403	11.239	4.482
Nitab4.5_0003912g0010.1	2.14832	3.61211	4.37348e-10	9.17335e-09	4.493	4.873	3.965	21.37	15.183	21.579
Nitab4.5_0002044g0020.1	2.14506	7.57739	2.97743e-19	1.81659e-17	61.75	79.204	84.051	366.534	253.464	372.094
Nitab4.5_0005936g0040.1	2.14487	2.78293	1.54777e-05	0.000139884	2.001	2.674	1.432	8.605	9.659	11.204
Nitab4.5_0000008g0430.1	2.14339	3.8625	5.1896e-07	6.38694e-06	5.228	6.329	4.526	34.445	14.141	22.565
Nitab4.5_0002544g0080.1	2.14157	2.35591	0.000325941	0.00209699	1.128	0.773	2.513	8.331	3.922	7.753
Nitab4.5_0004208g0030.1	2.14157	2.3551	0.000325941	0.00209699	1.981	1.258	1.031	5.912	6.667	6.745
Nitab4.5_0000902g0280.1	2.1405	2.35447	0.000499708	0.00303499	1.226	1.634	1.632	4.934	9.905	5.378
Nitab4.5_0000084g0210.1	2.13717	3.85994	1.45237e-11	3.70908e-10	4.777	4.932	5.838	22.085	25.492	23.674
Nitab4.5_0000811g0050.1	2.13453	3.00442	1.23288e-06	1.40932e-05	3.1	3.536	1.762	15.566	10.522	10.823
Nitab4.5_0000071g0210.1	2.13439	4.87789	2.51931e-11	6.22785e-10	11.447	11.746	10.514	52.382	33.706	63.694
Nitab4.5_0000188g0090.1	2.12842	6.04888	0.000868064	0.00491389	19.599	38.755	19.326	77.185	219.333	44.155
Nitab4.5_0000072g0600.1	2.12136	11.8658	4.10266e-27	5.21219e-25	1564.01	1213.45	1679.71	7350.62	5951.51	6013.73
Nitab4.5_0002793g0040.1	2.12104	5.36211	4.6546e-15	1.84284e-13	16.725	17.877	13.748	78.449	51.488	80.881
Nitab4.5_0002904g0100.1	2.115	2.16623	0.000912584	0.0051283	1.167	1.089	0.971	5.304	3.944	6.7
Nitab4.5_0000587g0070.1	2.10867	4.2946	3.48432e-07	4.41546e-06	6.788	8.537	7.32	23.98	49.135	23.002
Nitab4.5_0001685g0020.1	2.10821	3.50412	0.00383891	0.0174815	4.826	3.298	3.905	25.291	3.395	24.794
Nitab4.5_0000676g0140.1	2.10724	3.43573	1.44166e-08	2.33777e-07	3.316	3.962	4.145	18.164	13.749	19.148
Nitab4.5_0000200g0210.1	2.10719	4.36898	0.0125228	0.0466168	19.521	1.704	3.044	31.322	41.045	29.993
Nitab4.5_0000223g0060.1	2.10691	2.49099	0.000195876	0.00134375	1.609	1.713	1.842	7.831	5.659	8.257
Nitab4.5_0001799g0060.1	2.10514	7.1039	3.12106e-20	2.07447e-18	49.988	56.167	59.168	276.286	182.826	252.257
Nitab4.5_0000185g0030.1	2.10419	4.372	2.42433e-11	6.02273e-10	9.986	6.774	6.909	37.079	25.257	41.062
Nitab4.5_0000534g0080.1	2.10302	2.75692	0.00012463	0.000900217	1.55	0.872	4.356	13.695	8.382	6.89
Nitab4.5_0003410g0020.1	2.10151	5.63414	3.71384e-09	6.67992e-08	20.305	20.68	18.234	66.28	126.43	60.647
Nitab4.5_0000233g0100.1	2.10127	3.83501	3.92091e-11	9.47104e-10	5.326	5.764	4.896	27.699	21.458	19.551
Nitab4.5_0000152g0250.1	2.10095	6.5309	1.52669e-11	3.87914e-10	34.99	43.925	32.763	152.594	215.601	107.984
Nitab4.5_0003495g0040.1	2.09963	7.4343	2.44312e-19	1.49972e-17	64.614	68.824	75.48	374.222	235.435	284.345
Nitab4.5_0001215g0230.1	2.09758	2.75476	0.000418907	0.00262035	3.188	1.704	2.323	6.555	15.486	6.498
Nitab4.5_0002778g0080.1	2.09553	4.40626	1.96073e-16	9.23892e-15	6.719	10.409	8.081	34.457	35.375	35.729
Nitab4.5_0000588g0010.1	2.09128	3.99404	1.25443e-12	3.72249e-11	6.101	7.389	5.247	30.452	25.638	21.881
Nitab4.5_0000058g0170.1	2.08961	6.12882	3.94402e-31	7.53983e-29	25.043	28.257	31.051	128.352	121.578	110
Nitab4.5_0000383g0010.1	2.0885	6.60933	9.09386e-14	3.11503e-12	41.376	42.222	35.467	204.154	113.319	186.602
Nitab4.5_0000286g0060.1	2.08543	4.54792	3.54199e-07	4.4857e-06	12.065	9.429	5.577	48.819	46.054	22.542
Nitab4.5_0004087g0010.1	2.08296	3.82069	6.42286e-11	1.51678e-09	5.827	4.873	5.077	22.872	25.615	20.279
Nitab4.5_0000223g0270.1	2.08195	3.25491	1.71868e-07	2.30147e-06	2.698	2.644	4.145	15.816	12.55	14.935
Nitab4.5_0003260g0030.1	2.08149	3.07088	1.25846e-06	1.43284e-05	2.698	2.951	2.664	13.814	10.197	14.229
Nitab4.5_0002998g0060.1	2.07991	2.61441	0.000116701	0.00085183	2.354	1.753	1.923	8.272	8.113	8.582
Nitab4.5_0001383g0170.1	2.07791	10.3771	4.32835e-33	1.02215e-30	520.326	561.379	546.252	2684.41	2201	1961.45
Nitab4.5_0004657g0030.1	2.07787	5.86692	1.54167e-21	1.15041e-19	23.817	21.849	25.444	93.716	118.294	86.315
Nitab4.5_0000072g0330.1	2.07571	4.86306	6.46455e-20	4.13492e-18	12.801	9.716	12.647	49.748	43.073	53.398
Nitab4.5_0000635g0200.1	2.07549	1.94897	0.00443083	0.0197162	1.226	0.723	0.981	5.411	3.597	4.414
Nitab4.5_0000026g0070.1	2.07548	1.94851	0.00443083	0.0197162	1.265	0.535	0.971	2.884	4.594	6.476
Nitab4.5_0002320g0020.1	2.07492	7.56179	5.96872e-15	2.34922e-13	74.914	63.288	93.674	325.558	246.226	399.936
Nitab4.5_0000164g0080.1	2.07312	6.12777	7.15579e-26	8.11516e-24	22.444	35.814	27.346	120.807	126.463	110.785
Nitab4.5_0000613g0170.1	2.07308	3.62679	1.13551e-08	1.88116e-07	3.924	5.962	4.226	21.787	13.962	23.013
Nitab4.5_0007696g0010.1	2.06381	3.55048	0.00351888	0.0162527	3.453	3.605	5.988	13.087	5.569	35.281
Nitab4.5_0000195g0240.1	2.06297	2.95626	3.41849e-06	3.55356e-05	2.776	3.318	1.762	7.997	14.388	10.969
Nitab4.5_0001401g0210.1	2.06225	5.41869	1.32673e-17	6.91728e-16	11.536	24.166	16.892	80.51	65.753	72.277
Nitab4.5_0000102g0440.1	2.05863	5.35622	9.02322e-16	3.8619e-14	14.174	14.411	21.148	73.908	55.578	79.122
Nitab4.5_0001175g0130.1	2.05444	4.87439	6.7738e-22	5.1504e-20	11.192	12.053	11.946	48.068	53.662	45.622
Nitab4.5_0000904g0020.1	2.0532	6.33504	3.35625e-28	4.583e-26	37.118	31.733	31.241	148.733	121.746	142.772
Nitab4.5_0000568g0260.1	2.05282	5.08391	1.14252e-08	1.88911e-07	11.693	14.074	15.731	77.602	59.635	34.699
Nitab4.5_0001057g0070.1	2.05073	7.38592	5.1604e-18	2.76226e-16	52.961	79.441	75.69	277.538	243.402	335.715
Nitab4.5_0002046g0020.1	2.04945	6.36423	1.00246e-22	8.31503e-21	25.21	37.992	38.801	132.202	135.147	153.684
Nitab4.5_0001586g0030.1	2.04781	3.04844	2.07756e-06	2.25787e-05	4.434	2.427	2.493	13.206	11.16	12.47
Nitab4.5_0000515g0030.1	2.04249	2.83515	0.000130309	0.000937343	3.678	1.545	2.243	10.5	6.04	14.117
Nitab4.5_0000377g0130.1	2.0406	2.83523	2.50721e-05	0.000217022	1.795	1.763	4.015	10.56	7.732	12.436
Nitab4.5_0002326g0130.1	2.03896	2.12533	0.0031824	0.0149079	1.148	1.119	0.701	5.59	2.633	7.843
Nitab4.5_0000468g0030.1	2.0384	2.12488	0.00260405	0.012514	1.324	1.08	1.662	4.66	5.11	6.319
Nitab4.5_0000506g0150.1	2.03798	4.99696	1.02063e-18	5.97292e-17	12.762	14.262	11.405	49.617	49.001	61.891
Nitab4.5_0003295g0070.1	2.03762	4.4409	3.24205e-16	1.48241e-14	8.034	7.943	10.013	36.674	31.857	38.239
Nitab4.5_0002219g0030.1	2.03577	2.83313	0.000441787	0.0027392	2.894	2.417	2.293	6.043	15.99	7.697
Nitab4.5_0004741g0020.1	2.03577	2.93483	0.00158485	0.00821397	3.875	2.625	1.192	17.222	4.37	12.156
Nitab4.5_0002937g0040.1	2.03497	5.52854	1.22348e-17	6.39555e-16	16.254	16.302	23.952	93.085	74.269	67.672
Nitab4.5_0002139g0080.1	2.03478	3.13421	7.64942e-07	9.11798e-06	3.571	3.457	2.353	15.578	13.021	11.652
Nitab4.5_0000486g0220.1	2.03398	4.47538	1.77573e-14	6.63765e-13	8.377	8.498	9.773	42.931	30.725	36.794
Nitab4.5_0004234g0010.1	2.03392	4.61234	8.12251e-08	1.15798e-06	8.475	12.836	7.72	59.069	31.364	31.494
Nitab4.5_0001989g0040.1	2.03319	4.8299	8.47619e-14	2.92341e-12	12.291	12.856	9.643	57.746	47.667	36.973
Nitab4.5_0004024g0030.1	2.03094	4.50854	1.41008e-12	4.15632e-11	10.731	7.478	9.533	43.73	29.179	40.435
Nitab4.5_0000149g0150.1	2.0306	9.1677	3.71013e-41	1.61899e-38	216.894	239.523	266.192	1013.44	935.89	990.843
Nitab4.5_0002463g0010.1	2.02988	2.58382	0.000191882	0.00131947	1.736	3.625	0.561	8.438	9.782	5.848
Nitab4.5_0001198g0090.1	2.02653	3.21622	1.91521e-05	0.000169805	3.875	3.189	3.935	15.947	7.586	17.803
Nitab4.5_0007184g0020.1	2.02449	6.94959	2.31016e-18	1.29893e-16	44.397	46.48	64.305	229.815	172.36	229.121
Nitab4.5_0001032g0030.1	2.02408	4.82386	7.77418e-17	3.82987e-15	11.771	11.459	11.465	53.05	38.681	49.757
Nitab4.5_0000083g0180.1	2.02319	6.61162	2.98322e-16	1.3766e-14	36.54	37.676	48.234	156.909	206.794	134.19
Nitab4.5_0001215g0120.1	2.02301	5.56956	2.26128e-09	4.25006e-08	21.208	20.046	18.044	83.931	48.878	107.659
Nitab4.5_0000082g0150.1	2.01956	7.15883	6.45767e-09	1.11553e-07	44.103	43.925	92.002	285.452	201.169	242.98
Nitab4.5_0001869g0010.1	2.0194	7.22907	2.4137e-31	4.75002e-29	59.278	61.743	68.771	260.112	229.687	275.785
Nitab4.5_0002206g0050.1	2.01867	3.71375	5.29157e-06	5.30029e-05	4.61	6.388	4.416	24.29	11.239	27.125
Nitab4.5_0002450g0070.1	2.01675	5.12738	3.94269e-15	1.57653e-13	14.125	14.411	14.499	67.579	45.157	63.706
Nitab4.5_0000008g0010.1	2.01488	4.42336	1.97405e-10	4.36399e-09	7.641	9.617	8.902	43.968	36.529	25.265
Nitab4.5_0001615g0070.1	2.01332	3.02567	3.4172e-06	3.55356e-05	2.972	2.565	2.694	11.418	12.684	11.182
Nitab4.5_0001440g0050.1	2.01224	3.02448	0.000905113	0.00509202	6.013	2.674	0	6.877	14.488	13.445
Nitab4.5_0001863g0120.1	2.00828	8.161	1.57817e-15	6.55871e-14	112.533	98.269	153.232	524.158	554.293	381.729
Nitab4.5_0000754g0260.1	2.00119	10.1125	7.70594e-36	2.17861e-33	423.498	502.172	488.355	1786.32	1779.37	2067.55
Nitab4.5_0000245g0280.1	2.00112	5.18422	2.30114e-17	1.18135e-15	14.243	12.103	18.575	71.667	58.895	52.793
Nitab4.5_0002707g0060.1	1.99919	2.80868	4.08155e-05	0.000335775	3.306	2.526	1.772	10.512	8.09	10.24
Nitab4.5_0001789g0050.1	1.99733	4.55028	1.07538e-05	0.000100541	10.221	8.666	10.414	50.07	17.469	47.998
Nitab4.5_0003875g0060.1	1.99208	6.37945	5.47771e-08	8.00248e-07	27.672	33.932	44.619	106.839	106.988	208.494
Nitab4.5_0000315g0020.1	1.9915	6.6113	1.50447e-20	1.02024e-18	30.939	48.451	45.62	155.669	156.964	182.647
Nitab4.5_0001076g0030.1	1.98986	6.2114	1.54454e-05	0.000139719	29.006	19.194	46.652	189.614	72.476	115.457
Nitab4.5_0001892g0080.1	1.98762	7.25187	1.21959e-24	1.2619e-22	67.106	62.585	66.848	249.636	223.68	300.534
Nitab4.5_0001097g0040.1	1.98713	4.7666	8.23151e-13	2.5073e-11	9.976	13.638	10.073	38.45	56.374	39.707
Nitab4.5_0000302g0150.1	1.9865	5.10492	2.31515e-12	6.55458e-11	12.929	11.538	19.125	72.227	54.491	46.295
Nitab4.5_0000759g0050.1	1.98605	5.03248	1.3453e-12	3.98292e-11	10.565	17.194	13.378	69.7	48.676	46.138
Nitab4.5_0000208g0200.1	1.9852	4.15663	7.63481e-13	2.34333e-11	7.043	6.329	8.221	24.636	30.008	32.043
Nitab4.5_0000297g0140.1	1.98068	4.39775	1.04034e-10	2.37573e-09	9.368	8.121	8.732	44.218	26.433	32.984
Nitab4.5_0002540g0040.1	1.97975	7.55552	3.2498e-21	2.36352e-19	77.886	77.976	87.065	387.702	306.633	261.489
Nitab4.5_0001663g0190.1	1.97822	1.90118	0.0075462	0.0305886	1.069	1.357	0.741	5.137	3.306	3.059
Nitab4.5_0000534g0070.1	1.97806	2.55383	0.000313757	0.00202835	2.148	0.168	3.555	8.14	5.636	9.77
Nitab4.5_0000263g0280.1	1.97464	5.24935	4.5071e-15	1.79416e-13	19.324	10.568	18.194	66.935	52.777	71.38
Nitab4.5_0000479g0020.1	1.97294	2.67308	0.00268658	0.01284	3.276	1.565	1.312	10.655	2.992	12.268
Nitab4.5_0000021g0770.1	1.97194	5.81314	7.1657e-19	4.24298e-17	20.855	24.077	27.667	99.08	107.067	77.554
Nitab4.5_0001317g0180.1	1.96668	5.98259	6.53166e-23	5.57915e-21	24.798	28.574	29.138	121.725	93.083	104.41
Nitab4.5_0004557g0020.1	1.96649	6.80655	6.8447e-06	6.69234e-05	45.143	63.932	36.358	127.601	309.334	128.431
Nitab4.5_0000527g0160.1	1.96595	10.7442	3.50719e-25	3.78494e-23	636.115	813.441	783.926	3392.38	2641.98	2660.34
Nitab4.5_0002093g0020.1	1.96275	6.52041	3.65245e-10	7.76649e-09	27.182	52.888	39.122	152.141	117.454	193.94
Nitab4.5_0006134g0060.1	1.96037	2.08319	0.0105859	0.0404746	1.285	0.911	1.712	5.459	1.961	7.652
Nitab4.5_0004550g0040.1	1.95757	3.4018	0.0101707	0.0390804	3.423	4.853	3.595	20.035	2.779	25.59
Nitab4.5_0002076g0030.1	1.95751	2.08315	0.00435015	0.0194046	1.413	0.654	1.772	6.138	2.308	5.736
Nitab4.5_0003883g0030.1	1.95751	2.08298	0.00435015	0.0194046	1.187	0.812	1.472	7.115	4.46	3.451
Nitab4.5_0001586g0050.1	1.95751	2.08273	0.00435015	0.0194046	1.108	1.515	0.991	4.35	3.384	7.171
Nitab4.5_0001693g0070.1	1.95751	2.08293	0.00435015	0.0194046	0.981	1.575	1.342	6.472	4.471	4.078
Nitab4.5_0001051g0040.1	1.9575	2.08227	0.00435015	0.0194046	1.158	0.733	1.682	3.492	6.107	5.355
Nitab4.5_0003618g0040.1	1.95715	5.43186	1.10096e-13	3.75842e-12	14.616	25.226	16.201	71.464	84.891	59.56
Nitab4.5_0000106g0330.1	1.95515	7.35359	5.5214e-18	2.94764e-16	62.25	79.996	71.555	268.324	225.193	333.216
Nitab4.5_0000040g0320.1	1.95415	4.17873	8.80713e-10	1.77495e-08	4.463	9.369	8.752	37.353	25.234	25.298
Nitab4.5_0001439g0030.1	1.95251	6.05715	1.5712e-28	2.25277e-26	26.544	29.703	30.28	119.294	102.73	113.866
Nitab4.5_0000119g0290.1	1.95154	6.62215	4.58972e-14	1.6335e-12	33.872	37.2	58.067	152.797	193.919	150.458
Nitab4.5_0000564g0190.1	1.95099	8.67364	2.88371e-26	3.2889e-24	155.958	174.076	205.622	755.535	702.069	607.859
Nitab4.5_0001332g0140.1	1.94809	2.98129	0.00479048	0.0210276	2.187	2.783	3.825	13.051	3.227	18.554
Nitab4.5_0000703g0090.1	1.94723	4.08371	2.97614e-08	4.60957e-07	8.426	6.141	6.529	36.984	20.091	24.335
Nitab4.5_0006949g0010.1	1.94308	2.2448	0.00151717	0.00791427	1.305	1.416	1.552	8.093	3.574	6.442
Nitab4.5_0002403g0080.1	1.94179	2.98051	9.13796e-06	8.71798e-05	1.962	2.932	3.394	12.503	8.606	12.929
Nitab4.5_0001556g0010.1	1.9417	6.85031	3.38405e-17	1.71103e-15	39.492	53.483	58.788	233.427	180.047	169.381
Nitab4.5_0002072g0060.1	1.94111	3.83347	6.88653e-10	1.41054e-08	6.572	6.864	4.316	25.506	18.231	24.649
Nitab4.5_0000021g1030.1	1.9384	6.28455	2.65487e-10	5.74879e-09	30.105	44.509	27.236	175.276	98.674	119.994
Nitab4.5_0004088g0100.1	1.93628	4.47384	7.45706e-12	1.98522e-10	10.29	8.22	10.103	37.782	27.957	42.497
Nitab4.5_0003087g0040.1	1.93602	3.07021	5.42845e-06	5.42018e-05	3.149	2.189	4.145	13.337	9.614	13.635
Nitab4.5_0000705g0020.1	1.93529	3.93252	9.98964e-11	2.28906e-09	6.298	4.982	6.939	23.325	25.391	23.775
Nitab4.5_0000915g0100.1	1.93474	8.35045	6.78655e-08	9.80752e-07	138.802	160.279	133.937	552.894	791.599	303.627
Nitab4.5_0007883g0020.1	1.93393	8.32188	6.96613e-21	4.85525e-19	149.278	152.762	122.832	588.173	429.982	596.498
Nitab4.5_0006073g0010.1	1.93298	4.53976	2.611e-12	7.31992e-11	8.887	9.231	11.605	43.98	29.414	40.312
Nitab4.5_0000059g0320.1	1.93053	3.65414	8.26285e-09	1.40679e-07	3.924	6.675	4.796	19.189	19.049	21.052
Nitab4.5_0001603g0040.1	1.93014	8.97593	1.17214e-30	2.08216e-28	213.176	233.006	222.905	953.11	731.158	854.973
Nitab4.5_0001004g0220.1	1.92027	6.90651	1.06888e-16	5.20765e-15	45.692	53.443	60.53	219.529	156.908	227.563
Nitab4.5_0000349g0130.1	1.91157	11.0483	3.02931e-28	4.16488e-26	842.386	1027.03	972.425	4090.45	3224.61	3335.19
Nitab4.5_0000119g0040.1	1.91009	7.11293	1.83679e-16	8.71627e-15	74.178	58.93	52.82	264.928	181.963	248.828
Nitab4.5_0000297g0160.1	1.90935	8.26194	4.14434e-20	2.70975e-18	112.219	158.239	141.407	602.976	459.687	480.862
Nitab4.5_0001135g0140.1	1.90898	4.45431	5.80382e-09	1.00866e-07	10.731	6.18	10.724	34.397	46.076	25.847
Nitab4.5_0000568g0190.1	1.90829	9.0991	2.45923e-26	2.83702e-24	226.605	233.224	277.907	1054.44	818.929	883.935
Nitab4.5_0001863g0130.1	1.90643	4.22751	7.20352e-13	2.22798e-11	8.299	8.141	7.48	33.158	27.868	28.346
Nitab4.5_0000496g0180.1	1.90589	5.17658	5.13204e-21	3.66603e-19	13.488	15.639	18.344	63.979	61.103	54.126
Nitab4.5_0005183g0040.1	1.90406	5.1121	6.19198e-11	1.46398e-09	10.104	13.935	21.869	53.741	68.285	48.143
Nitab4.5_0001618g0080.1	1.90294	8.94529	1.16234e-32	2.5924e-30	207.006	230.718	227.19	890.585	727.102	857.886
Nitab4.5_0000382g0070.1	1.90225	5.75875	2.43779e-12	6.87271e-11	26.034	24.305	21.879	86.517	116.311	66.865
Nitab4.5_0000359g0070.1	1.90189	2.95728	0.00807248	0.032253	0.824	0.456	6.959	11.585	8.314	13.041
Nitab4.5_0003328g0120.1	1.90172	5.5607	3.96988e-18	2.15372e-16	21.021	27.118	15.581	85.242	79.468	69.184
Nitab4.5_0000643g0220.1	1.89863	4.94174	1.05001e-12	3.16944e-11	17	8.587	14.209	52.394	41.74	57.252
Nitab4.5_0000232g0110.1	1.89689	6.2642	6.30534e-24	5.94212e-22	32.488	33.427	37.63	146.206	121.219	116.689
Nitab4.5_0000847g0030.1	1.89572	8.03941	1.4972e-13	4.98636e-12	95.69	130.022	130.022	456.567	327.397	535.167
Nitab4.5_0002470g0030.1	1.89455	9.38487	1.73971e-23	1.59458e-21	352.694	306.99	246.926	1256.57	1076.52	1020.78
Nitab4.5_0000245g0270.1	1.89436	6.52718	3.95887e-05	0.000326969	46.702	21.353	55.954	195.347	184.596	82.461
Nitab4.5_0002219g0090.1	1.89429	4.13537	7.79674e-12	2.06198e-10	6.239	8.31	8.081	28.867	26.938	27.595
Nitab4.5_0004022g0010.1	1.89424	5.17044	2.54967e-09	4.7225e-08	10.447	13.192	24.753	56.149	68.733	52.939
Nitab4.5_0000101g0110.1	1.89272	5.34412	4.00879e-06	4.11183e-05	18.451	17.213	18.304	59.832	37.034	104.342
Nitab4.5_0001464g0020.1	1.89102	3.56486	0.000421176	0.00263127	3.737	2.585	8.211	19.153	9.054	26.24
Nitab4.5_0001741g0020.1	1.88823	3.56393	3.56709e-08	5.41211e-07	5.258	5.13	4.206	21.394	15.082	16.918
Nitab4.5_0000691g0030.1	1.88802	9.37285	7.81873e-39	2.85355e-36	278.379	306.119	316.588	1161.27	1023.52	1135.64
Nitab4.5_0000191g0030.1	1.88259	4.04482	0.00181169	0.0092276	5.17	9.092	6.248	17.389	48.597	12.089
Nitab4.5_0000337g0100.1	1.87663	4.32229	1.86124e-09	3.55139e-08	7.769	9.052	9.052	37.365	36.238	22.285
Nitab4.5_0001110g0030.1	1.87506	6.64793	2.8922e-09	5.31641e-08	29.997	47.659	58.597	192.689	120.199	187.184
Nitab4.5_0000535g0200.1	1.87443	4.62321	1.363e-12	4.02938e-11	8.358	14.42	9.402	37.925	34.748	46.989
Nitab4.5_0002918g0050.1	1.87393	1.85204	0.0127377	0.0470524	0.706	0.862	1.412	6.329	2.622	2.577
Nitab4.5_0000391g0390.1	1.87393	1.85189	0.0127377	0.0470524	1.069	1.496	1.061	4.66	2.073	5.187
Nitab4.5_0000329g0070.1	1.87393	1.85139	0.0127377	0.0470524	1.942	0.832	0	5.197	3.911	1.322
Nitab4.5_0000305g0150.1	1.87393	1.85179	0.0127377	0.0470524	1.03	1.04	1.131	5.781	2.992	2.241
Nitab4.5_0000343g0030.1	1.87393	1.85144	0.0127377	0.0470524	1.413	1	0.941	3.695	3.384	4.078
Nitab4.5_0000085g0030.1	1.87393	1.85154	0.0127377	0.0470524	0.373	1.139	0.631	2.968	2.689	5.938
Nitab4.5_0001028g0200.1	1.87393	1.8515	0.0127377	0.0470524	0.893	1.595	1.061	3.48	3.104	4.056
Nitab4.5_0001803g0110.1	1.87355	6.80344	5.56722e-07	6.81823e-06	49.41	35.447	68.3	247.896	114.081	196.696
Nitab4.5_0001106g0010.1	1.87261	4.84725	4.86424e-17	2.42885e-15	11.398	13.133	13.858	49.164	40.877	50.294
Nitab4.5_0000914g0110.1	1.8718	2.03907	0.00720686	0.029469	0.834	0.436	2.263	3.85	4.549	6.095
Nitab4.5_0000770g0010.1	1.8718	2.03876	0.00720686	0.029469	1.069	1.842	1.001	4.601	6.185	3.328
Nitab4.5_0002906g0080.1	1.87079	5.08517	5.50691e-21	3.90601e-19	15.999	12.885	16.412	59.51	55.915	51.314
Nitab4.5_0001612g0020.1	1.87034	2.2052	0.00249895	0.0120783	1.363	1.228	1.342	5.34	5.042	5.927
Nitab4.5_0000192g0150.1	1.87034	2.2047	0.00408453	0.0184071	2.305	1.109	0.601	4.16	7.194	5.367
Nitab4.5_0000989g0110.1	1.86927	2.35467	0.00143458	0.0075581	1.442	1.664	2.493	7.592	5.468	6.532
Nitab4.5_0000354g0130.1	1.86845	2.48934	0.000824013	0.00468832	2.492	1.862	1.312	8.307	9.289	4.605
Nitab4.5_0000245g0120.1	1.86817	6.77805	6.20807e-29	9.16284e-27	50.675	47.748	51.919	167.898	193.908	185.38
Nitab4.5_0002610g0040.1	1.86782	2.61381	0.000473813	0.00290308	2.031	1.912	2.533	8.963	7.149	8.358
Nitab4.5_0008854g0020.1	1.86781	2.61357	0.000473813	0.00290308	1.991	2.219	1.973	8.26	7.239	8.291
Nitab4.5_0001561g0100.1	1.86687	2.83391	4.08155e-05	0.000335775	2.482	2.763	3.184	12.491	10.466	7.294
Nitab4.5_0001323g0140.1	1.8665	2.93204	2.40341e-05	0.000209028	2.913	2.476	3.645	9.69	12.516	9.691
Nitab4.5_0000072g0300.1	1.86582	3.48398	3.3213e-06	3.46871e-05	4.473	3.476	5.607	16.567	12.046	22.15
Nitab4.5_0000681g0160.1	1.86576	6.40968	1.25633e-11	3.23312e-10	34.617	37.131	44.829	150.95	99.481	173.683
Nitab4.5_0001018g0120.1	1.86509	4.67604	1.01782e-11	2.64646e-10	11.006	10.053	13.197	52.335	36.641	35.584
Nitab4.5_0003750g0050.1	1.86465	4.55338	1.74741e-12	5.04687e-11	14.567	9.449	7.009	44.016	36.888	32.962
Nitab4.5_0000529g0010.1	1.86425	3.93223	3.92754e-10	8.29869e-09	3.718	7.973	8.071	21.632	22.422	27.618
Nitab4.5_0000050g0050.1	1.86337	4.8403	2.59551e-18	1.4553e-16	12.419	11.459	14.409	48.116	42.401	49.555
Nitab4.5_0000121g0040.1	1.8602	7.86426	2.96735e-14	1.07905e-12	116.662	118.523	86.344	420.025	291.215	451.048
Nitab4.5_0000581g0050.1	1.85985	6.36027	5.72354e-23	4.93084e-21	29.575	42.875	40.774	147.088	130.609	131.232
Nitab4.5_0000026g0030.1	1.85898	5.09793	5.58111e-10	1.15495e-08	14.165	13.905	18.274	75.612	47.914	45.443
Nitab4.5_0000005g0440.1	1.85791	6.48234	1.88896e-12	5.43223e-11	38.423	33.387	51.598	166.205	168.08	110.885
Nitab4.5_0006635g0060.1	1.85521	6.87443	1.47084e-24	1.48363e-22	54.098	53.106	55.113	203.189	214.974	166.838
Nitab4.5_0000968g0020.1	1.85403	7.39555	2.48076e-17	1.26708e-15	70.264	81.125	82.149	349.788	237.754	252.57
Nitab4.5_0000526g0030.1	1.85305	7.39944	3.30201e-31	6.43506e-29	71.275	77.292	85.132	293.151	287.159	261.41
Nitab4.5_0000535g0150.1	1.85198	4.48054	1.27985e-14	4.8841e-13	9.456	9.27	10.944	39.248	33.818	33.533
Nitab4.5_0000074g0050.1	1.85003	6.31421	2.5332e-17	1.29058e-15	43.259	29.455	37.219	150.306	110.059	134.212
Nitab4.5_0002378g0020.1	1.84998	6.6273	9.05159e-23	7.53911e-21	38.747	47.689	50.216	146.754	178.747	164.698
Nitab4.5_0000919g0110.1	1.84871	7.65989	3.71935e-31	7.17871e-29	88.009	94.426	98.5	358.239	304.897	344.174
Nitab4.5_0002381g0070.1	1.84865	4.10293	4.93674e-11	1.18111e-09	6.513	7.121	8.932	28.974	27.016	25.343
Nitab4.5_0000203g0180.1	1.84862	5.02323	5.13519e-16	2.29064e-14	17.176	15.985	10.894	61.643	50.233	48.065
Nitab4.5_0000297g0020.1	1.8472	3.96856	2.34107e-10	5.11342e-09	5.483	7.804	6.368	28.056	19.374	25.87
Nitab4.5_0000218g0060.1	1.84159	6.61367	1.06021e-19	6.6298e-18	39.384	42.281	54.132	142.499	177.784	165.942
Nitab4.5_0001701g0060.1	1.8415	3.46763	8.9105e-07	1.04904e-05	5.14	5.348	3.705	20.381	11.16	18.565
Nitab4.5_0000302g0170.1	1.84073	7.60123	8.3639e-22	6.3116e-20	84.056	81.165	104.919	357.619	281.377	326.965
Nitab4.5_0000444g0150.1	1.83568	7.40246	9.06042e-08	1.27987e-06	86.381	73.033	76.791	364.842	323.296	153.528
Nitab4.5_0004468g0010.1	1.83229	7.76346	5.78985e-23	4.96665e-21	114.455	94.407	95.827	420.251	326.131	333.833
Nitab4.5_0000132g0530.1	1.83212	3.90808	5.03612e-05	0.000405008	7.749	5.081	6.298	34.075	23.901	12.033
Nitab4.5_0000794g0110.1	1.83032	2.909	0.00148042	0.00775281	2.698	2.476	3.364	10.465	4.74	15.316
Nitab4.5_0000134g0040.1	1.8283	5.83761	1.52412e-25	1.69965e-23	27.299	27.147	24.973	102.536	89.351	90.124
Nitab4.5_0000308g0250.1	1.82734	2.90852	3.87192e-05	0.0003205	2.511	2.793	3.274	10.906	8.135	11.865
Nitab4.5_0000102g0300.1	1.82734	2.9083	3.87192e-05	0.0003205	2.462	2.427	4.085	11.668	10.847	8.84
Nitab4.5_0001781g0170.1	1.826	7.40913	8.71737e-31	1.57643e-28	73.805	82.304	82.609	303.115	277.735	262.688
Nitab4.5_0000119g0420.1	1.82432	5.83511	3.02686e-20	2.02527e-18	24.759	24.354	30.25	106.577	83.524	92.029
Nitab4.5_0002540g0080.1	1.82423	2.80753	6.61312e-05	0.000516317	2.511	2.674	3.214	8.248	8.998	11.675
Nitab4.5_0001800g0020.1	1.82333	3.75063	8.80244e-07	1.03875e-05	7.798	5.299	4.506	20.262	27.509	15.036
Nitab4.5_0005191g0060.1	1.8228	5.41826	4.55726e-17	2.28695e-15	19.648	20.155	19.396	83.347	66.089	60.983
Nitab4.5_0001096g0020.1	1.82061	2.7001	0.000485207	0.00296035	3.208	1.793	2.533	8.319	5.625	12.392
Nitab4.5_0000213g0080.1	1.81929	4.85909	6.5075e-18	3.45569e-16	11.516	12.469	15.771	50.416	44.205	46.104
Nitab4.5_0000287g0100.1	1.81889	6.30837	4.22265e-12	1.14542e-10	35.716	47.837	27.536	161.009	121.589	109.294
Nitab4.5_0000304g0160.1	1.81722	6.16248	1.77953e-18	1.01479e-16	34.362	26.712	39.452	130.45	121.701	101.272
Nitab4.5_0000716g0020.1	1.81655	4.63867	7.91253e-07	9.40926e-06	10.251	15.421	8.852	56.387	34.994	28.962
Nitab4.5_0002456g0020.1	1.81641	7.62342	1.67191e-13	5.52888e-12	89.736	89.326	99.822	378.405	230.874	367.444
Nitab4.5_0000045g0470.1	1.81599	2.58403	0.000755552	0.00435185	2.295	2.397	2.443	10.596	5.446	8.1
Nitab4.5_0000956g0010.1	1.81599	2.58399	0.000755552	0.00435185	1.648	2.902	2.003	9.63	4.841	8.459
Nitab4.5_0000287g0240.1	1.81599	2.58348	0.000755552	0.00435185	2.756	2.011	1.542	8.045	6.297	9.187
Nitab4.5_0001614g0200.1	1.81283	4.34983	1.7134e-12	4.9701e-11	8.24	6.18	13.067	33.468	28.45	34.676
Nitab4.5_0000499g0060.1	1.81036	2.45663	0.00132252	0.00703789	1.471	1.832	1.993	5.268	6.465	8.717
Nitab4.5_0000190g0040.1	1.80657	3.79249	1.03907e-08	1.73376e-07	6.523	4.754	6.509	23.182	19.688	20.526
Nitab4.5_0001991g0020.1	1.80508	7.7985	1.85949e-14	6.92496e-13	81.977	109.045	124.575	431.109	302.207	368.531
Nitab4.5_0000690g0070.1	1.80474	2.45591	0.0105447	0.0403322	1.619	2.436	1.933	6.245	12.169	2.79
Nitab4.5_0001478g0010.1	1.79893	3.62388	7.99645e-08	1.14163e-06	4.257	5.002	6.368	19.845	15.889	20.133
Nitab4.5_0000274g0070.1	1.79777	3.06891	2.10492e-05	0.000184991	2.756	3.902	3.304	11.382	10.286	14.083
Nitab4.5_0001159g0150.1	1.79701	7.94547	3.73713e-18	2.03846e-16	93.228	118.761	139.775	437.915	362.559	417.212
Nitab4.5_0000368g0200.1	1.79622	7.59865	0.00017829	0.00123706	109.011	85.929	81.708	442.098	399.29	119.165
Nitab4.5_0001616g0060.1	1.79597	2.97982	0.000460369	0.0028364	3.992	1.486	3.425	12.205	6.219	14.319
Nitab4.5_0002612g0010.1	1.79374	2.16534	0.00662094	0.0274696	0.922	2.149	1.732	5.673	3.989	6.263
Nitab4.5_0002128g0050.1	1.79374	2.16535	0.00662094	0.0274696	1.462	1.03	1.913	5.84	4.101	5.994
Nitab4.5_0002877g0020.1	1.79362	3.36506	0.00200871	0.0100802	4.62	4.249	4.526	20.846	5.244	19.977
Nitab4.5_0000059g0310.1	1.79296	5.30781	5.86504e-16	2.5705e-14	14.743	22.473	18.705	60.737	59.623	73.061
Nitab4.5_0000131g0030.1	1.79134	6.04762	2.78279e-22	2.21663e-20	26.142	33.981	33.715	118.757	104.613	101.239
Nitab4.5_0000595g0050.1	1.79056	6.1922	1.72476e-16	8.20405e-15	32.076	38.052	34.405	143.572	99.615	116.79
Nitab4.5_0007589g0020.1	1.79036	5.04567	1.15256e-06	1.32202e-05	17.549	15.49	13.908	47.686	34.008	77.666
Nitab4.5_0000188g0230.1	1.79031	5.39473	3.39679e-12	9.35306e-11	13.753	24.097	21.408	60.582	62.862	81.195
Nitab4.5_0000059g0080.1	1.78754	4.90899	9.26715e-16	3.95786e-14	14.675	11.519	15.721	55.267	46.368	43.74
Nitab4.5_0000895g0150.1	1.78719	10.5429	1.20424e-09	2.36061e-08	650.044	684.518	806.876	2875.54	1530.4	2952.06
Nitab4.5_0001820g0010.1	1.78709	2.88371	6.20854e-05	0.00048853	2.276	3.516	2.974	11.692	9.558	9.736
Nitab4.5_0003514g0010.1	1.78634	4.14963	0.00947416	0.0368627	8.505	7.359	7.73	10.87	57.562	13.837
Nitab4.5_0002278g0060.1	1.78545	4.05814	3.02671e-10	6.49094e-09	7.347	6.18	9.052	28.319	28.764	20.582
Nitab4.5_0004242g0020.1	1.78493	4.70167	4.5319e-15	1.7978e-13	11.016	14.232	10.834	36.805	42.703	44.894
Nitab4.5_0004513g0040.1	1.78445	5.22658	1.7128e-13	5.65476e-12	17.971	15.47	19.666	73.919	50.951	57.387
Nitab4.5_0000907g0020.1	1.78424	5.81729	1.04847e-21	7.853e-20	26.534	27.306	25.774	101.571	81.81	93.161
Nitab4.5_0000247g0080.1	1.78357	3.72391	4.34748e-08	6.45944e-07	6.965	4.11	6.048	20.75	19.183	20.145
Nitab4.5_0000996g0050.1	1.78235	5.75075	1.72598e-14	6.4758e-13	22.473	27.811	27.066	93.12	101.991	68.434
Nitab4.5_0001477g0200.1	1.7811	5.31643	5.8658e-21	4.11017e-19	18.402	22.393	15.01	64.778	65.686	63.235
Nitab4.5_0000125g0300.1	1.78007	4.92727	4.87591e-18	2.62397e-16	13.802	14.916	13.428	51.763	44.384	51.146
Nitab4.5_0001083g0030.1	1.77838	7.39493	2.31429e-12	6.55458e-11	64.663	92.872	85.082	269.647	344.35	214.499
Nitab4.5_0000207g0030.1	1.77517	4.1341	5.80406e-10	1.19615e-08	8.73	6.874	8.491	25.899	22.579	32.727
Nitab4.5_0008803g0030.1	1.77438	6.25514	8.79559e-06	8.43948e-05	55.737	28.405	26.415	103.907	178.164	91.76
Nitab4.5_0000651g0110.1	1.77358	7.97076	2.06859e-20	1.39338e-18	102.478	121.405	138.673	466.579	403.044	365.797
Nitab4.5_0006360g0020.1	1.773	7.76756	1.63109e-16	7.77693e-15	85.783	98.259	130.603	329.848	398.539	343.748
Nitab4.5_0001816g0090.1	1.76915	3.13289	1.93366e-05	0.000171366	3.365	3.159	4.065	13.111	9.144	14.621
Nitab4.5_0004038g0030.1	1.76321	4.0448	0.000259928	0.00172423	7.063	9.29	5.698	23.73	39.622	12.907
Nitab4.5_0001194g0100.1	1.76059	5.98771	9.10255e-06	8.69246e-05	44.681	16.233	31.432	127.708	73.003	109.283
Nitab4.5_0000495g0090.1	1.76008	5.73399	8.90026e-06	8.52768e-05	19.589	23.899	33.164	101.535	46.524	110.908
Nitab4.5_0001803g0070.1	1.7582	3.65281	1.15955e-07	1.603e-06	5.827	4.427	6.749	19.261	16.169	21.68
Nitab4.5_0002826g0060.1	1.75775	6.26344	3.32109e-14	1.20333e-12	34.902	37.071	39.652	155.336	121.891	98.841
Nitab4.5_0000185g0300.1	1.75681	7.01325	2.72539e-07	3.52719e-06	51.254	67.547	69.422	241.615	122.149	269.746
Nitab4.5_0000868g0080.1	1.75511	3.85746	6.12652e-09	1.05924e-07	5.905	7.884	5.547	27.258	18.231	21.366
Nitab4.5_0000573g0080.1	1.75471	2.95592	5.74247e-05	0.000456328	3.119	2.971	3.415	10.774	8.034	13.602
Nitab4.5_0001478g0030.1	1.75231	5.33145	7.24787e-13	2.23825e-11	15.234	22.057	21.278	66.566	52.968	75.1
Nitab4.5_0000329g0220.1	1.75228	3.53226	3.05957e-05	0.000259572	5.287	4.843	5.177	25.208	11.261	15.495
Nitab4.5_0004821g0010.1	1.75119	4.75819	1.15861e-15	4.88587e-14	13.311	13.905	11.946	44.814	37.896	45.903
Nitab4.5_0002401g0030.1	1.75059	10.9976	1.16739e-28	1.68583e-26	895.797	1042.84	1054.32	3728.02	3142.83	3160.77
Nitab4.5_0004436g0040.1	1.75029	8.90297	1.18137e-29	1.85263e-27	215.854	245.376	240.007	857.594	786.254	705.299
Nitab4.5_0001780g0140.1	1.74924	6.10093	1.59155e-16	7.62463e-15	24.455	41.845	33.294	103.788	116.614	114.751
Nitab4.5_0000649g0170.1	1.74905	3.99009	1.25516e-09	2.44849e-08	7.171	7.854	6.819	23.003	21.447	28.245
Nitab4.5_0002182g0040.1	1.74807	3.53139	3.37265e-07	4.28748e-06	4.198	4.734	5.557	18.069	12.494	20.918
Nitab4.5_0005860g0020.1	1.74735	5.07878	1.36756e-09	2.65742e-08	13.831	20.739	13.828	59.546	40.003	63.313
Nitab4.5_0001198g0180.1	1.74588	4.75272	3.61026e-08	5.46522e-07	13.566	12.202	12.667	51.048	27.666	49.342
Nitab4.5_0001897g0030.1	1.74519	2.42206	0.00701717	0.0288698	1.128	2.189	2.293	3.921	10.959	5.412
Nitab4.5_0000227g0160.1	1.7446	5.37689	7.11786e-16	3.09257e-14	21.139	21.205	17.814	78.997	59.03	62.372
Nitab4.5_0000055g0200.1	1.74422	7.48762	8.45514e-16	3.63426e-14	80.113	87.672	95.907	287.621	237.878	352.734
Nitab4.5_0000344g0120.1	1.74324	4.30012	1.54797e-07	2.09382e-06	10.565	7.557	9.733	21.573	39.319	31.573
Nitab4.5_0000190g0030.1	1.74241	10.0394	2.68644e-16	1.24538e-14	443.872	576.929	526.786	1601.72	2102.45	1450.65
Nitab4.5_0001651g0120.1	1.74147	4.92156	9.32526e-11	2.15156e-09	15.116	13.767	14.229	55.589	35.364	53.734
Nitab4.5_0000142g0350.1	1.74021	2.85713	0.00355761	0.0164022	2.403	3.853	2.924	7.759	16.169	5.053
Nitab4.5_0002267g0010.1	1.737	3.63879	1.0451e-06	1.21472e-05	5.317	5.229	6.679	22.49	13.032	20.918
Nitab4.5_0000058g0320.1	1.73632	4.33042	7.61556e-12	2.02473e-10	8.573	8.993	10.584	32.252	26.893	34.419
Nitab4.5_0001215g0240.1	1.73435	3.3966	1.6987e-05	0.000152088	5.395	4.14	4.145	12.515	21.1	11.764
Nitab4.5_0000109g0570.1	1.73011	5.79117	5.17084e-06	5.19491e-05	18.736	39.805	22.5	61.262	120.569	85.621
Nitab4.5_0000318g0020.1	1.72778	7.33408	0.00167516	0.00861531	70.706	109.263	59.008	189.125	480.372	116.779
Nitab4.5_0000242g0150.1	1.72624	3.02434	5.2473e-05	0.000420811	3.983	2.932	3.134	12.693	9.121	12.47
Nitab4.5_0000273g0180.1	1.72329	5.34468	3.42962e-07	4.35163e-06	21.561	21.878	15.881	55.422	93.262	46.844
Nitab4.5_0004355g0040.1	1.72196	5.19951	8.96348e-11	2.08005e-09	17.137	16.708	19.476	56.995	45.662	73.408
Nitab4.5_0001781g0090.1	1.72009	3.51307	3.73259e-05	0.000310503	4.807	4.942	5.387	14.708	24.215	11.282
Nitab4.5_0000042g0050.1	1.71937	4.01252	1.7926e-09	3.43951e-08	6.759	7.874	8.281	25.554	25.335	23.752
Nitab4.5_0000264g0170.1	1.71874	7.49216	4.72915e-22	3.65108e-20	82.124	79.134	106.571	306.476	288.638	282.507
Nitab4.5_0002472g0070.1	1.71752	3.96757	1.04915e-06	1.21873e-05	7.347	8.161	6.629	29.308	15.676	28.133
Nitab4.5_0001535g0030.1	1.71733	4.59807	7.33135e-14	2.5549e-12	9.75	12.895	11.415	42.156	37.504	34.519
Nitab4.5_0000297g0290.1	1.71639	3.44949	1.41691e-06	1.59605e-05	5.081	3.377	6.028	18.784	13.334	15.327
Nitab4.5_0000039g0190.1	1.71555	2.93188	9.07849e-05	0.000685342	3.267	3.674	2.123	12.193	8.662	10.666
Nitab4.5_0001057g0030.1	1.7151	4.24474	5.26995e-11	1.25336e-09	9.535	8.636	8.461	31.346	25.974	30.374
Nitab4.5_0000142g0030.1	1.71442	3.96576	3.04874e-09	5.57479e-08	8.269	8.844	5.337	25.542	25.335	21.142
Nitab4.5_0001599g0090.1	1.71437	8.17905	3.32294e-12	9.17489e-11	144.128	144.7	143.67	589.889	495.544	329.183
Nitab4.5_0000602g0010.1	1.71361	4.3486	3.07634e-11	7.52148e-10	9.505	8.646	10.974	37.579	28.607	29.029
Nitab4.5_0000575g0130.1	1.71293	9.24345	1.92e-13	6.29742e-12	314.085	334.742	257.38	1092.62	728.917	1132.76
Nitab4.5_0000142g0250.1	1.71285	2.12438	0.0106361	0.0405198	1.422	1.763	1.332	5.757	2.7	6.734
Nitab4.5_0001781g0140.1	1.71285	2.12396	0.0106361	0.0405198	1.344	1.684	1.362	5.232	5.345	4.627
Nitab4.5_0002185g0130.1	1.71285	2.12396	0.0106361	0.0405198	1.265	1.743	1.612	5.089	4.93	4.123
Nitab4.5_0002368g0040.1	1.70719	7.46727	5.52174e-16	2.44136e-14	87.195	75.559	102.095	339.896	245.777	276.894
Nitab4.5_0001306g0010.1	1.70639	2.5212	0.00188365	0.00953366	2.698	1.238	2.013	9.69	6.925	4.941
Nitab4.5_0002987g0020.1	1.70638	2.52095	0.00188365	0.00953366	0.687	4.447	1.142	8.522	7.709	5.837
Nitab4.5_0003757g0040.1	1.70523	5.24285	5.44933e-16	2.41466e-14	16.028	20.611	19.225	62.787	66.044	52.356
Nitab4.5_0003030g0120.1	1.70375	3.86962	2.78053e-08	4.31326e-07	6.386	7.567	6.639	27.83	17.548	21.086
Nitab4.5_0000479g0060.1	1.70288	4.55928	4.2983e-13	1.35447e-11	10.957	12.806	10.324	42.752	33.907	34.318
Nitab4.5_0002713g0060.1	1.70132	5.41163	1.14747e-16	5.57702e-15	20.227	21.264	21.939	76.458	58.413	69.408
Nitab4.5_0003180g0070.1	1.70128	3.09047	6.44408e-05	0.000505479	2.962	3.268	4.426	13.218	7.743	14.352
Nitab4.5_0002022g0020.1	1.70117	6.60178	1.3829e-18	7.99968e-17	41.69	54.78	48.855	173.631	162.175	135.321
Nitab4.5_0000863g0200.1	1.69906	3.49894	3.15552e-06	3.30588e-05	5.277	2.803	7.169	21.43	15.407	13.165
Nitab4.5_0001553g0050.1	1.69821	5.34223	3.14211e-16	1.44329e-14	24.592	16.679	18.705	66.375	70.302	56.793
Nitab4.5_0000176g0040.1	1.69663	4.81841	4.05949e-11	9.78224e-10	14.273	14.242	12.356	56.125	40.149	37.993
Nitab4.5_0000091g0300.1	1.69427	7.24187	1.40568e-05	0.000128139	73.089	77.104	77.893	265.547	350.771	120.05
Nitab4.5_0003042g0010.1	1.69408	4.0423	0.00765355	0.0309324	7.445	9.775	6.078	15.983	48.082	10.016
Nitab4.5_0000804g0130.1	1.69372	5.04171	2.6715e-08	4.15054e-07	10.682	20.512	17.303	38.998	55.097	62.372
Nitab4.5_0000519g0260.1	1.69199	7.30585	1.95939e-16	9.23892e-15	84.39	73.875	80.627	310.064	211.724	247.417
Nitab4.5_0000040g0360.1	1.69173	9.41001	6.56601e-23	5.58473e-21	315.389	317.231	394.772	1106.56	1010.5	1187.15
Nitab4.5_0000013g0560.1	1.69166	4.55132	2.53159e-12	7.10723e-11	12.566	8.428	13.107	42.299	34.008	34.172
Nitab4.5_0002503g0010.1	1.69162	3.76533	4.95769e-07	6.12028e-06	6.317	5.14	7.58	26.352	14.892	20.302
Nitab4.5_0001863g0160.1	1.69011	5.54164	7.75497e-16	3.34046e-14	23.052	24.444	21.809	85.373	62.436	75.089
Nitab4.5_0001879g0160.1	1.68693	4.29782	0.00100135	0.00554179	9.564	13.341	5.557	21.394	51.04	17.814
Nitab4.5_0001072g0040.1	1.68669	4.71072	7.18404e-05	0.000554849	7.504	16.372	14.479	53.515	23.43	47.18
Nitab4.5_0000193g0010.1	1.68602	6.15203	5.04278e-16	2.25443e-14	37.079	39.755	30.691	120.855	95.178	127.053
Nitab4.5_0003183g0010.1	1.68427	6.0727	1.57365e-19	9.74933e-18	29.281	33.783	37.459	104.312	100.153	119.68
Nitab4.5_0000027g0010.1	1.68281	8.33132	8.10851e-14	2.80141e-12	163.129	183	142.989	479.606	654.502	427.251
Nitab4.5_0001044g0090.1	1.68239	6.01877	9.47703e-09	1.59057e-07	28.575	32.981	35.407	125.408	68.14	120.095
Nitab4.5_0000319g0380.1	1.68134	9.06939	8.64543e-27	1.05176e-24	252.649	282.23	281.212	948.688	769.088	888.103
Nitab4.5_0000123g0230.1	1.68017	4.06856	2.28381e-09	4.28038e-08	8.132	6.913	8.732	28.795	23.352	24.447
Nitab4.5_0000262g0060.1	1.67894	3.94224	1.13348e-08	1.88036e-07	6.602	5.477	9.743	23.504	22.097	24.066
Nitab4.5_0000116g0290.1	1.67894	5.80126	1.00189e-18	5.89761e-17	28.28	25.929	29.549	92.465	77.955	96.712
Nitab4.5_0001411g0030.1	1.67883	5.22356	8.68054e-15	3.37683e-13	22.591	13.806	19.476	64.539	52.878	61.084
Nitab4.5_0001815g0050.1	1.67877	6.87475	1.91235e-13	6.28257e-12	52.764	59.673	66.157	235.405	153.266	179.229
Nitab4.5_0000743g0100.1	1.676	7.59247	2.81131e-14	1.02789e-12	91.884	103.291	98.881	296.035	252.086	386.233
Nitab4.5_0000276g0120.1	1.67422	5.83406	9.11529e-22	6.85285e-20	26.377	29.415	29.359	99.807	88.007	85.677
Nitab4.5_0002166g0010.1	1.67193	4.70147	1.07826e-09	2.13451e-08	10.202	12.826	15.04	50.607	38.961	32.559
Nitab4.5_0004944g0060.1	1.67007	3.29018	1.42223e-05	0.00012953	3.747	4.358	4.806	17.222	10.443	14.935
Nitab4.5_0000913g0020.1	1.66869	6.75309	3.1924e-08	4.89543e-07	44.201	46.569	74.238	210.924	127.505	183.285
Nitab4.5_0001664g0090.1	1.66851	7.82861	2.40575e-14	8.86066e-13	97.681	122.861	126.497	435.46	295.35	369.159
Nitab4.5_0001270g0190.1	1.66815	4.28235	1.03746e-10	2.37186e-09	9.142	8.547	10.073	31.727	28.73	29.366
Nitab4.5_0001577g0060.1	1.66775	3.97782	6.64255e-09	1.14353e-07	7.916	8.112	6.749	29.022	22.31	20.626
Nitab4.5_0000440g0170.1	1.66569	5.0005	2.59883e-09	4.80352e-08	13.449	13.995	20.257	39.224	61.596	49.734
Nitab4.5_0000938g0020.1	1.66565	3.06757	7.3866e-05	0.000569398	3.963	3.308	3.455	11.442	13.021	10.823
Nitab4.5_0000264g0190.1	1.66506	7.49733	1.42178e-14	5.39495e-13	77.66	96.675	101.414	278.622	246.248	347.86
Nitab4.5_0002182g0080.1	1.66465	4.95603	1.94546e-13	6.3705e-12	16.588	15.015	14.439	56.232	40.53	50.026
Nitab4.5_0001707g0070.1	1.66329	3.41509	3.44135e-06	3.57178e-05	3.659	5.735	5.227	16.472	12.102	18.296
Nitab4.5_0001820g0060.1	1.66134	4.13268	2.37105e-07	3.10463e-06	9.397	8.428	7.48	34.373	27.072	18.856
Nitab4.5_0001076g0060.1	1.66122	2.24306	0.00593517	0.0251928	1.775	1.882	1.582	5.494	5.748	5.636
Nitab4.5_0000892g0170.1	1.66047	2.24243	0.0119505	0.0447624	2.972	0.773	1.252	4.338	8.157	3.081
Nitab4.5_0003463g0120.1	1.66005	7.89279	1.12406e-15	4.75016e-14	103.577	120.049	140.816	445.233	323.139	379.892
Nitab4.5_0000745g0090.1	1.6591	2.80693	0.00024833	0.00165331	2.756	3.546	2.153	9.63	7.81	10.364
Nitab4.5_0001079g0100.1	1.65788	8.12257	6.14539e-07	7.44906e-06	135.143	143.422	150.068	466.365	623.52	257.523
Nitab4.5_0001789g0130.1	1.65765	5.82242	2.50014e-10	5.44901e-09	24.013	25.513	36.909	107.733	70.168	93.62
Nitab4.5_0005622g0060.1	1.65647	4.09682	0.00304811	0.0143324	8.475	6.824	9.152	14.91	47.869	15.092
Nitab4.5_0000249g0200.1	1.65391	5.80753	6.50749e-19	3.86464e-17	24.288	27.207	32.984	97.673	82.404	88.623
Nitab4.5_0000072g0350.1	1.65388	5.88872	1.66207e-19	1.02655e-17	28.516	32.357	28.778	103.68	83.704	96.444
Nitab4.5_0001143g0070.1	1.65354	7.93748	4.53029e-21	3.25937e-19	115.603	136.074	125.766	415.865	338.86	428.192
Nitab4.5_0000446g0060.1	1.65283	4.49826	0.000492965	0.00299857	9.437	13.163	11.145	24.171	59.78	20.638
Nitab4.5_0004464g0010.1	1.65233	3.46623	0.00246473	0.0119388	5.042	4.605	5.708	16.519	6.409	24.817
Nitab4.5_0003854g0020.1	1.65141	5.45471	1.22738e-08	2.01613e-07	16.627	27.791	22.82	61.083	91.178	56.535
Nitab4.5_0002709g0070.1	1.65101	3.96612	2.42749e-07	3.17646e-06	6.023	10.479	6.699	24.493	17.996	28.38
Nitab4.5_0002401g0040.1	1.65012	3.96577	1.02292e-08	1.70967e-07	7.19	8.528	6.198	26.114	21.055	23.584
Nitab4.5_0000635g0080.1	1.64476	3.13174	6.58147e-05	0.000514246	2.884	3.358	5.267	12.717	10.768	13.187
Nitab4.5_0000804g0030.1	1.64257	3.91656	2.68623e-08	4.1702e-07	7.955	7.408	6.639	21.108	26.344	21.187
Nitab4.5_0000496g0160.1	1.63984	2.69903	0.00145564	0.00763698	3.325	3.229	1.152	9.595	6.432	8.918
Nitab4.5_0001842g0060.1	1.63926	4.79962	2.02063e-05	0.000178286	13.488	13.113	15.07	60.32	23.643	47.101
Nitab4.5_0000245g0250.1	1.63681	4.39224	2.30691e-09	4.31561e-08	9.652	9.191	12.386	39.475	30.333	26.945
Nitab4.5_0000208g0210.1	1.63539	6.15372	1.97631e-17	1.02243e-15	33.93	33.813	41.685	128.745	101.879	110.034
Nitab4.5_0001616g0070.1	1.63388	2.88288	0.000223456	0.00150619	3.021	3.823	2.553	10.906	7.754	10.924
Nitab4.5_0000097g0050.1	1.63215	8.61582	1.3972e-24	1.42366e-22	187.486	206.294	217.257	633.726	567.706	684.404
Nitab4.5_0002277g0010.1	1.63196	5.79077	3.06826e-15	1.24927e-13	27.858	28.366	28.978	99.831	72.095	91.491
Nitab4.5_0003914g0120.1	1.63168	4.1849	4.06018e-06	4.15816e-05	11.035	9.142	6.809	39.141	21.514	23.349
Nitab4.5_0000026g0110.1	1.63063	4.97496	0.00108285	0.00593071	13.144	10.122	24.683	49.427	25.806	73.061
Nitab4.5_0004227g0040.1	1.62996	4.67091	3.04943e-09	5.57479e-08	12.742	14.341	10.854	46.781	42.378	29.097
Nitab4.5_0000132g0410.1	1.62738	9.04551	6.68291e-17	3.32045e-15	265.784	310.298	249.78	931.406	929.044	680.27
Nitab4.5_0000869g0140.1	1.62577	3.81698	7.86287e-08	1.12496e-06	7.985	6.15	6.238	23.313	17.973	21.747
Nitab4.5_0000101g0070.1	1.62558	4.58814	1.83432e-12	5.29027e-11	12.271	11.885	12.136	35.959	39.308	36.155
Nitab4.5_0000618g0040.1	1.62537	5.07166	7.36226e-08	1.05862e-06	13.743	18.897	18.565	61.143	36.081	61.678
Nitab4.5_0000743g0200.1	1.6233	3.32649	1.9402e-05	0.000171794	4.444	3.843	5.487	16.412	10.78	15.506
Nitab4.5_0007561g0010.1	1.62252	5.85365	1.68131e-12	4.9125e-11	28.32	34.764	27.106	112.44	76.409	86.405
Nitab4.5_0000351g0040.1	1.62199	7.23448	2.03193e-08	3.21663e-07	61.554	67.695	105.92	248.253	288.682	185.761
Nitab4.5_0000244g0030.1	1.62155	5.3043	1.16189e-11	3.00937e-10	18.903	18.58	22.95	70.987	66.985	48.233
Nitab4.5_0004179g0020.1	1.62059	2.35316	0.00523353	0.0226749	1.501	2.734	1.332	4.636	5.782	7.764
Nitab4.5_0000442g0240.1	1.61924	3.56124	1.60995e-06	1.79237e-05	5.307	5.705	5.848	18.605	15.43	17.22
Nitab4.5_0000116g0160.1	1.61675	5.47051	1.76083e-07	2.3532e-06	28.888	24.146	16.302	94.443	58.077	58.429
Nitab4.5_0000365g0050.1	1.61653	2.58162	0.00257064	0.0123772	2.541	2.684	1.612	6.055	9.793	6.386
Nitab4.5_0005070g0010.1	1.61435	8.02529	1.3619e-09	2.64898e-08	131.563	111.858	166.119	532.704	315.217	402.177
Nitab4.5_0000922g0050.1	1.61419	3.94082	3.67923e-08	5.5487e-07	5.366	8.755	9.052	19.404	24.327	23.932
Nitab4.5_0002791g0020.1	1.61201	7.56467	8.70473e-11	2.02234e-09	100.241	116.523	81.368	247.729	384.869	273.488
Nitab4.5_0001352g0020.1	1.61191	4.8297	2.66208e-14	9.76891e-13	13.723	13.024	16.322	47.841	39.902	44.737
Nitab4.5_0007027g0030.1	1.6112	4.24321	5.68758e-10	1.17456e-08	9.613	9.34	9.172	29.081	25.246	32.491
Nitab4.5_0003901g0030.1	1.60963	4.52003	0.000119764	0.000871976	12.203	8.3	14.509	55.028	25.044	25.623
Nitab4.5_0004195g0080.1	1.60829	3.25054	0.00282757	0.0134402	4.601	4.883	3.505	17.222	18.063	5.176
Nitab4.5_0000069g0600.1	1.6079	5.42213	3.2921e-18	1.83054e-16	21.679	22.482	22.239	71.738	62.38	68.277
Nitab4.5_0000465g0140.1	1.60781	7.69566	3.4252e-05	0.000287313	102.203	107.45	117.716	511.739	310.129	173.672
Nitab4.5_0000206g0030.1	1.6043	4.13188	2.82418e-09	5.20089e-08	8.73	8.775	9.022	29.344	25.884	24.671
Nitab4.5_0000148g0070.1	1.60428	6.92047	6.80545e-18	3.60438e-16	51.371	76.074	64.005	202.116	189.459	186.893
Nitab4.5_0000899g0130.1	1.60341	4.39988	4.4333e-11	1.06447e-09	8.416	11.39	11.275	33.444	31.274	32.155
Nitab4.5_0001198g0240.1	1.60138	4.48642	1.90744e-06	2.09683e-05	12.733	8.884	12.446	47.83	26.265	29.702
Nitab4.5_0001014g0060.1	1.59918	6.39166	3.25331e-07	4.14626e-06	36.363	47.708	48.534	138.971	85.452	175.23
Nitab4.5_0000233g0300.1	1.59756	3.02436	0.00228399	0.0112176	4.983	1.268	4.155	16.877	6.533	9.803
Nitab4.5_0000303g0330.1	1.59696	6.30045	5.10736e-22	3.91298e-20	44.672	43.578	36.348	119.568	127.326	127.456
Nitab4.5_0000387g0120.1	1.59508	3.65078	1.46962e-06	1.65079e-05	5.807	6.279	5.557	21.752	20.259	13.209
Nitab4.5_0002322g0070.1	1.59496	6.57843	1.22797e-18	7.16542e-17	50.165	46.599	54.482	166.992	132.548	156.239
Nitab4.5_0001612g0080.1	1.59479	3.54524	9.35436e-06	8.90749e-05	5.248	4.853	6.218	14.302	13.357	22.542
Nitab4.5_0002445g0060.1	1.59427	3.43093	7.33383e-06	7.14621e-05	2.972	6.438	5.447	15.566	15.833	15.047
Nitab4.5_0002172g0090.1	1.5936	7.55503	6.16609e-16	2.69656e-14	105.431	87.87	105.59	328.764	245.396	323.503
Nitab4.5_0001727g0140.1	1.5923	3.02369	0.000176238	0.00122579	3.6	4.546	3.244	13.575	8.651	11.663
Nitab4.5_0000828g0010.1	1.59213	4.1953	0.00014596	0.00103785	6.896	6.121	14.459	35.47	17.917	30.396
Nitab4.5_0000588g0270.1	1.59177	3.7918	0.000699507	0.00406992	4.787	8.636	6.479	33.813	14.376	14.162
Nitab4.5_0001083g0100.1	1.59124	2.85764	0.000347745	0.00222585	2.913	3.447	3.234	9.952	7.799	11.137
Nitab4.5_0000098g0100.1	1.5893	9.10589	1.82526e-14	6.81011e-13	297.615	318.192	262.687	919.202	686.684	1023.7
Nitab4.5_0000116g0360.1	1.5875	7.00322	9.088e-12	2.37531e-10	63.672	55.711	84.672	242.211	176.338	192.282
Nitab4.5_0007026g0060.1	1.58707	5.68868	0.000315293	0.00203666	13.615	20.512	46.992	90.558	74.594	79.29
Nitab4.5_0007482g0020.1	1.58617	3.96524	0.00195763	0.00985101	7.014	3.288	12.016	31.93	26.657	11.865
Nitab4.5_0003514g0040.1	1.58512	8.74765	2.70154e-09	4.98877e-08	230.941	204.036	251.292	882.242	706.282	465.322
Nitab4.5_0000929g0010.1	1.58463	2.20478	0.00936983	0.0365418	1.56	1.803	1.953	6.329	2.555	6.711
Nitab4.5_0001056g0070.1	1.58339	4.29133	3.11689e-09	5.69293e-08	10.594	9.944	8.772	35.756	24.674	28.357
Nitab4.5_0000141g0090.1	1.58009	5.2233	9.66225e-08	1.3582e-06	16.754	19.165	23.091	69.51	40.317	66.036
Nitab4.5_0000742g0170.1	1.57998	4.85012	2.29053e-05	0.000200077	14.832	14.341	15.541	50.392	24.753	59.381
Nitab4.5_0002093g0240.1	1.57574	4.0349	0.000627226	0.00369868	8.446	7.349	8.942	23.992	12.124	37.074
Nitab4.5_0000391g0030.1	1.57412	3.73543	9.88211e-07	1.15328e-05	5.964	6.507	7.61	18.867	20.08	19.08
Nitab4.5_0000304g0120.1	1.57154	2.93107	0.000307534	0.00199778	4.964	1.357	3.635	13.611	8.807	8.795
Nitab4.5_0000573g0030.1	1.56991	4.43607	1.24883e-05	0.000115148	10.28	8.943	14.639	45.35	22.422	31.707
Nitab4.5_0000326g0360.1	1.56957	4.28199	5.27602e-08	7.73599e-07	7.691	9.785	11.715	32.884	21.716	34.049
Nitab4.5_0001488g0110.1	1.56838	2.92934	0.00134909	0.00716788	3.747	3.14	3.945	6.341	15.116	8.627
Nitab4.5_0000295g0040.1	1.567	2.75358	0.000944338	0.00526695	2.55	2.545	3.004	9.046	6.376	10.543
Nitab4.5_0002245g0180.1	1.56697	3.41371	1.12215e-05	0.00010433	4.964	5.527	4.155	16.424	14.455	14.341
Nitab4.5_0000306g0330.1	1.56697	3.41328	1.12215e-05	0.00010433	5.003	4.526	5.537	14.648	17.312	13.87
Nitab4.5_0000383g0340.1	1.56696	4.21328	1.99285e-09	3.77382e-08	8.897	10.261	9.102	29.32	24.439	29.13
Nitab4.5_0000625g0010.1	1.56687	6.37537	9.01811e-20	5.71043e-18	46.133	41.746	44.749	146.051	120.726	126.638
Nitab4.5_0002093g0170.1	1.56594	6.49514	9.96416e-12	2.59754e-10	42.092	44.252	58.647	152.201	160.886	113.854
Nitab4.5_0000490g0020.1	1.56568	7.26457	3.9403e-13	1.2495e-11	60.965	94.555	92.292	253.367	254.708	221.625
Nitab4.5_0000652g0050.1	1.56523	7.07471	1.34676e-14	5.12971e-13	69.273	74.836	73.417	224.368	246.27	168.989
Nitab4.5_0004728g0070.1	1.56399	5.12365	1.07969e-12	3.25415e-11	15.567	16.074	23.341	61.071	49.427	52.11
Nitab4.5_0000030g0450.1	1.56199	3.67891	1.69934e-06	1.88666e-05	6.562	7.141	5.377	17.342	19.822	18.722
Nitab4.5_0000072g0630.1	1.56194	4.30824	2.55028e-09	4.7225e-08	7.298	10.201	13.308	26.543	34.131	29.859
Nitab4.5_0004399g0080.1	1.55973	5.95951	1.03004e-12	3.11385e-11	41.729	23.82	34.045	108.209	95.895	89.195
Nitab4.5_0002786g0030.1	1.55943	3.15159	0.000135497	0.000968254	4.944	3.932	3.905	13.432	11.362	12.425
Nitab4.5_0001606g0070.1	1.55715	12.178	3.04929e-22	2.40978e-20	2398.85	2393.55	2718.81	8317.75	7174.9	6520.15
Nitab4.5_0001002g0020.1	1.55624	4.53989	1.70187e-10	3.77894e-09	11.977	11.588	12.366	36.161	40.429	29.265
Nitab4.5_0001797g0030.1	1.55417	3.00054	0.000270125	0.00178245	4.081	2.753	3.835	11.871	9.289	11.294
Nitab4.5_0001383g0090.1	1.55356	4.02159	3.88453e-08	5.81897e-07	7.2	10.865	6.378	24.636	25.111	22.699
Nitab4.5_0000187g0120.1	1.55135	2.31792	0.00814464	0.0324637	2.443	0.782	3.024	7.676	3.552	6.285
Nitab4.5_0000335g0230.1	1.55135	2.31761	0.00814464	0.0324637	1.972	1.525	2.223	7.39	4.482	6.017
Nitab4.5_0000057g0150.1	1.54823	2.83272	0.000895871	0.00504427	2.707	3.011	3.435	11.633	5.468	11.473
Nitab4.5_0000676g0010.1	1.54431	9.93604	2.79869e-22	2.22048e-20	478.97	547.137	571.956	1684.09	1579.59	1378.13
Nitab4.5_0001797g0070.1	1.54362	3.21061	0.00502247	0.0219023	5.434	4.487	3.124	14.565	18.601	5.456
Nitab4.5_0000457g0110.1	1.54349	6.97367	4.2029e-11	1.01036e-09	71.736	75.985	57.366	189.054	159.788	244.492
Nitab4.5_0000178g0070.1	1.54322	3.97591	6.65052e-08	9.63174e-07	7.789	8.904	7.26	24.612	21.873	23.562
Nitab4.5_0000137g0100.1	1.5432	3.97526	1.00195e-07	1.40155e-06	8.161	6.448	9.102	21.763	26.344	22.027
Nitab4.5_0001781g0120.1	1.54027	4.42086	0.00626817	0.0263458	8.377	15.609	9.022	22.896	58.391	15.641
Nitab4.5_0000613g0190.1	1.54017	4.01255	0.00142882	0.00753467	4.699	8.211	11.465	27.878	11.687	31.786
Nitab4.5_0001187g0080.1	1.53989	10.7818	6.56435e-06	6.44649e-05	1107.87	820.136	953.37	3947.49	2812.7	1591.66
Nitab4.5_0000038g0160.1	1.53899	6.11986	1.36788e-08	2.23051e-07	31.704	40.399	40.423	144.192	102.092	81.509
Nitab4.5_0002016g0070.1	1.5382	8.36349	4.13989e-12	1.12449e-10	144.952	173.006	220.091	606.778	483.61	468.269
Nitab4.5_0000007g0320.1	1.53802	10.4188	1.3542e-10	3.06114e-09	620.43	848.145	771.89	2425.6	1600.48	2451.16
Nitab4.5_0002401g0010.1	1.53798	2.6415	0.00338768	0.0157169	3.237	2.387	2.954	9.809	7.216	5.983
Nitab4.5_0001348g0090.1	1.53708	7.10089	7.55055e-18	3.98848e-16	78.121	67.636	79.175	188.16	232.331	226.152
Nitab4.5_0000042g0070.1	1.53401	5.00713	8.56344e-10	1.73106e-08	16.195	18.194	17.233	59.593	38.132	50.832
Nitab4.5_0000759g0290.1	1.53279	3.26897	6.79767e-05	0.00052826	6.729	3.466	3.945	12.61	13.267	14.173
Nitab4.5_0000231g0060.1	1.53238	3.70864	1.2683e-05	0.000116676	6.808	6.725	6.649	24.254	12.74	19.988
Nitab4.5_0000357g0080.1	1.53163	5.0054	3.60943e-15	1.45486e-13	16.274	18.689	15.951	49.296	47.354	50.754
Nitab4.5_0001863g0060.1	1.52943	4.04323	5.13584e-08	7.54456e-07	7.975	9.369	7.69	21.549	27.968	23.708
Nitab4.5_0000143g0100.1	1.52884	7.6113	1.88961e-22	1.52944e-20	100.604	117.79	102.716	317.572	284.346	320.601
Nitab4.5_0000403g0130.1	1.52883	4.32329	0.00357115	0.0164412	7.906	11.221	11.275	17.628	53.505	18.464
Nitab4.5_0002863g0040.1	1.52702	5.28495	5.33762e-09	9.36556e-08	23.091	18.065	22.079	78.806	50.065	52.625
Nitab4.5_0001622g0050.1	1.52597	6.33566	4.5907e-09	8.11171e-08	49.429	51.155	31.381	157.934	113.443	108.353
Nitab4.5_0001707g0050.1	1.52514	3.96359	1.50539e-07	2.04312e-06	7.249	10.786	5.718	23.563	23.598	21.635
Nitab4.5_0001036g0130.1	1.52459	2.42228	0.00701472	0.0288656	1.893	2.436	2.173	6.329	4.785	8.145
Nitab4.5_0004739g0010.1	1.5238	3.12954	0.000392898	0.00247852	2.874	4.764	4.196	7.699	16.27	11.114
Nitab4.5_0003237g0030.1	1.51864	2.72559	0.00289659	0.0137292	1.619	3.595	3.475	6.746	9.592	9.198
Nitab4.5_0000747g0050.1	1.51316	5.48572	1.97356e-07	2.61659e-06	17.676	25.731	28.848	81.249	49.494	78.237
Nitab4.5_0004860g0010.1	1.51311	4.95224	9.38692e-11	2.1633e-09	19.422	18.045	12.276	54.611	46.625	40.715
Nitab4.5_0000308g0060.1	1.50937	4.93111	6.74247e-05	0.000524783	16.44	18.709	13.888	41.882	69.843	28.559
Nitab4.5_0001920g0030.1	1.50922	3.82928	6.27131e-06	6.19813e-05	8.936	4.922	7.83	24.91	14.735	22.173
Nitab4.5_0000759g0090.1	1.50844	4.17332	6.92463e-06	6.76719e-05	9.211	7.379	11.375	35.982	19.99	24.279
Nitab4.5_0000278g0040.1	1.50772	4.42259	2.24683e-05	0.000196431	12.095	15.985	5.898	30.965	40.855	25.03
Nitab4.5_0002967g0020.1	1.50452	6.24116	3.51662e-13	1.12576e-11	45.486	44.43	35.227	118.4	99.1	136.083
Nitab4.5_0000241g0170.1	1.50291	7.06335	5.33498e-08	7.81281e-07	65.203	60.465	96.267	253.998	158.959	214.645
Nitab4.5_0000101g0290.1	1.50269	9.03867	1.045e-14	4.02617e-13	312.28	320.222	244.843	845.032	694.573	931.731
Nitab4.5_0001110g0050.1	1.50261	2.52034	0.00600204	0.0254175	2.187	2.635	2.343	8.021	5.446	7.988
Nitab4.5_0001443g0050.1	1.5026	2.52003	0.00600204	0.0254175	1.903	2.04	3.084	7.485	6.701	6.655
Nitab4.5_0007164g0010.1	1.50199	2.80623	0.0008276	0.0047034	2.05	3.457	3.705	11.776	8.281	7.081
Nitab4.5_0004439g0030.1	1.50198	2.80557	0.0008276	0.0047034	2.207	3.694	3.805	8.105	9.782	9.053
Nitab4.5_0001485g0120.1	1.50131	3.24958	0.000102323	0.000762124	4.365	4.279	4.916	12.157	15.598	12.56
Nitab4.5_0000652g0100.1	1.50101	5.93991	1.64917e-09	3.18e-08	28.771	26.692	45.58	86.625	90.617	108.611
Nitab4.5_0000041g0180.1	1.49939	5.14911	2.83984e-10	6.13607e-09	16.99	20.611	20.167	67.65	47.477	48.188
Nitab4.5_0006228g0020.1	1.49772	5.38811	3.00113e-12	8.3553e-11	22.924	21.532	24.002	71.464	70.795	52.322
Nitab4.5_0001664g0060.1	1.49715	5.55421	9.64822e-07	1.12992e-05	24.857	27.454	25.654	80.439	45.807	92.074
Nitab4.5_0000882g0090.1	1.49618	8.80571	2.20757e-16	1.03293e-14	211.136	280.368	256.579	781.517	703.234	617.147
Nitab4.5_0000109g0360.1	1.49501	3.48114	0.000123257	0.000891901	5.837	6.497	4.155	21.632	10.443	15.585
Nitab4.5_0001348g0210.1	1.49363	5.17973	8.49303e-13	2.57524e-11	19.53	18.768	20.787	62.919	47.544	56.154
Nitab4.5_0001492g0080.1	1.49162	5.51212	2.61894e-10	5.68938e-09	21.139	22.76	31.882	65.731	63.075	82.483
Nitab4.5_0004081g0040.1	1.4898	4.69783	1.85379e-11	4.6689e-10	13.723	14.282	14.089	44.886	37.616	35.561
Nitab4.5_0004979g0100.1	1.48962	3.10981	0.000308902	0.00200148	4.404	3.823	4.366	13.17	9.48	12.067
Nitab4.5_0000316g0350.1	1.48962	3.10973	0.000308902	0.00200148	3.659	3.853	4.836	11.656	8.964	13.568
Nitab4.5_0001082g0080.1	1.48821	5.57492	1.11513e-15	4.73235e-14	21.737	30.327	26.876	73.586	78.471	68.086
Nitab4.5_0000391g0250.1	1.48748	2.88143	0.000720611	0.00417575	3.737	3.873	3.114	9.094	9.323	10.408
Nitab4.5_0001606g0040.1	1.48526	9.22799	7.98702e-14	2.7642e-12	351.007	345.072	312.293	1032.56	727.393	1050.36
Nitab4.5_0000200g0140.1	1.48525	4.95313	7.38249e-08	1.06076e-06	18.804	12.598	19.616	60.725	40.07	41.712
Nitab4.5_0000459g0090.1	1.48485	4.57069	5.7205e-11	1.3573e-09	11.673	15.312	11.605	36.257	35.823	35.348
Nitab4.5_0003110g0130.1	1.48473	3.36187	0.000911703	0.00512622	4.601	4.496	6.439	16.758	7.597	17.893
Nitab4.5_0004201g0030.1	1.48422	2.61161	0.00511098	0.0221909	3.011	2.734	2.103	7.449	6.421	9.008
Nitab4.5_0004981g0010.1	1.48421	2.61178	0.00511098	0.0221909	1.805	2.407	4.085	7.521	7.227	7.619
Nitab4.5_0000737g0120.1	1.48108	8.6627	3.66266e-18	2.00328e-16	208.566	256.469	218.278	593.918	594.106	707.383
Nitab4.5_0000728g0140.1	1.48104	4.69119	0.000485074	0.00296035	8.897	20.056	13.137	35.458	25.201	55.986
Nitab4.5_0003573g0010.1	1.48104	4.08558	8.2149e-06	7.94687e-05	8.299	9.528	8.431	18.033	32.708	23.674
Nitab4.5_0000381g0370.1	1.48019	4.96919	5.06384e-12	1.36255e-10	19.315	17.114	14.579	53.55	48.967	41.13
Nitab4.5_0000008g0500.1	1.47874	6.03071	0.00203849	0.0101965	26.24	39.3	43.968	90.272	47.555	165.785
Nitab4.5_0003278g0020.1	1.47873	3.89258	9.96186e-05	0.000744747	5.552	9.449	7.65	31.203	15.923	17.052
Nitab4.5_0001948g0010.1	1.47861	2.28045	0.0125606	0.0466389	2.021	1.317	1.973	6.15	3.922	6.229
Nitab4.5_0008249g0010.1	1.47861	2.28025	0.0125606	0.0466389	0.775	1.991	3.194	5.054	5.939	4.93
Nitab4.5_0000012g0250.1	1.47861	2.28049	0.0125606	0.0466389	0.677	0.792	4.306	5.971	5.625	4.459
Nitab4.5_0000268g0120.1	1.47861	2.27974	0.0125606	0.0466389	2.845	0.99	2.433	5.59	7.597	3.16
Nitab4.5_0000431g0020.1	1.47814	4.11965	2.05123e-06	2.23652e-05	6.768	7.111	14.039	22.526	23.677	30.206
Nitab4.5_0000257g0060.1	1.47586	5.97298	1.20815e-06	1.38262e-05	25.955	26.137	53.12	103.096	97.99	90.707
Nitab4.5_0000059g0190.1	1.47475	2.95419	0.000624188	0.0036851	4.208	3.288	2.674	13.385	7.272	9.232
Nitab4.5_0000241g0120.1	1.47474	2.95338	0.000624188	0.0036851	4.659	3.635	2.864	10.858	10.679	8.974
Nitab4.5_0005064g0010.1	1.47419	4.15087	3.43028e-08	5.20847e-07	9.083	7.606	11.075	25.16	24.159	29.186
Nitab4.5_0000227g0140.1	1.47309	5.90931	0.000334292	0.00214728	29.506	20.581	51.047	124.538	61.327	93.598
Nitab4.5_0000805g0060.1	1.47189	3.41141	0.000650885	0.00381243	7.259	6.19	2.193	13.623	20.17	10.621
Nitab4.5_0003316g0030.1	1.47078	4.66053	1.06181e-09	2.10402e-08	12.35	13.123	15.921	39.618	43.062	31.248
Nitab4.5_0000747g0040.1	1.46993	3.92811	2.80107e-06	2.96393e-05	7.396	7.19	9.142	21.871	16.931	27.685
Nitab4.5_0003750g0030.1	1.46902	6.04188	5.31133e-19	3.17305e-17	34.627	36.992	39.242	104.646	95.828	104.701
Nitab4.5_0000512g0070.1	1.46861	2.69857	0.00433664	0.0193745	0.981	3.645	4.576	8.772	5.614	9.826
Nitab4.5_0000084g0420.1	1.46751	5.41016	2.27443e-08	3.56956e-07	28.212	16.57	26.074	61.798	54.335	78.562
Nitab4.5_0000164g0130.1	1.4666	6.87867	1.42851e-10	3.21823e-09	56.286	64.516	77.913	193.404	145.12	209.626
Nitab4.5_0001618g0140.1	1.46573	8.72306	3.39398e-18	1.87679e-16	229.715	246.228	241.95	620.818	763.687	588.084
Nitab4.5_0000340g0050.1	1.46553	5.49216	1.15391e-09	2.27305e-08	27.858	21.581	25.374	82.966	53.797	70.865
Nitab4.5_0000468g0230.1	1.46514	3.46248	4.00697e-05	0.000330588	3.934	7.2	6.028	10.786	17.48	17.781
Nitab4.5_0000492g0200.1	1.46467	4.93938	1.73034e-12	5.01033e-11	16.225	15.025	19.396	50.261	47.589	41.522
Nitab4.5_0003912g0070.1	1.46346	3.02225	0.000538373	0.00323169	3.757	4.605	3.755	11.942	10.824	9.221
Nitab4.5_0000305g0320.1	1.46282	5.58309	9.34796e-16	3.9839e-14	25.024	24.127	30.821	77.984	68.644	74.697
Nitab4.5_0000707g0290.1	1.46158	5.68009	2.20421e-16	1.03293e-14	28.388	26.494	31.351	84.372	80.701	71.392
Nitab4.5_0001764g0080.1	1.46086	3.8403	9.90066e-07	1.15477e-05	8.819	7.101	6.398	22.359	21.234	17.938
Nitab4.5_0008162g0030.1	1.46071	6.55378	3.91639e-20	2.5775e-18	51.244	55.988	52.359	157.159	142.095	138.257
Nitab4.5_0002354g0020.1	1.46006	5.28595	2.03149e-12	5.80886e-11	20.737	19.085	25.484	60.141	66.38	52.154
Nitab4.5_0001454g0150.1	1.45984	6.39627	9.45167e-10	1.89534e-08	40.346	43.866	57.876	150.854	102.775	137.708
Nitab4.5_0000062g0510.1	1.45852	2.38798	0.0106931	0.0406828	2.443	2.902	1.752	7.342	4.112	7.294
Nitab4.5_0000690g0020.1	1.45782	5.26912	3.30418e-09	6.01312e-08	20.394	18.333	25.774	71.643	47.365	57.992
Nitab4.5_0001885g0020.1	1.45687	3.87957	6.60875e-06	6.48058e-05	6.474	8.656	7.69	26.865	15.508	21.556
Nitab4.5_0000003g0600.1	1.45553	3.87783	8.59977e-07	1.01723e-05	8.976	9.241	5.297	21.43	22.399	19.786
Nitab4.5_0000989g0100.1	1.45479	4.03297	3.12954e-07	4.00377e-06	8.053	7.765	9.903	28.14	18.735	25.142
Nitab4.5_0001614g0020.1	1.45468	5.15299	9.42266e-11	2.16772e-09	16.901	16.372	26.205	60.106	50.424	52.322
Nitab4.5_0000919g0060.1	1.45464	4.0324	2.20742e-07	2.90364e-06	7.965	7.646	10.143	25.315	21.111	25.175
Nitab4.5_0000770g0090.1	1.45393	6.74904	1.78938e-17	9.2812e-16	55.884	68.804	58.788	182.629	156.527	160.53
Nitab4.5_0001894g0060.1	1.45281	5.52394	8.16911e-13	2.49363e-11	27.652	23.077	26.946	78.151	59.78	74.092
Nitab4.5_0000264g0080.1	1.4523	5.80945	4.4751e-10	9.35716e-09	26.475	36.794	31.041	88.818	68.812	101.149
Nitab4.5_0000305g0300.1	1.45051	3.9157	7.45556e-07	8.91868e-06	6.396	7.21	9.953	23.432	19.934	22.229
Nitab4.5_0000258g0290.1	1.44932	5.354	3.70848e-09	6.67627e-08	20.688	28.207	19.686	49.677	71.938	65.341
Nitab4.5_0004076g0020.1	1.44929	6.32915	6.88957e-14	2.40931e-12	43.053	40.498	53.24	140.449	109.588	122.302
Nitab4.5_0001495g0130.1	1.44811	5.02514	0.000555201	0.00331288	13.174	23.79	17.683	53.562	69.002	25.937
Nitab4.5_0000149g0240.1	1.44724	6.69156	1.16479e-11	3.01299e-10	59.856	62.822	53.891	197.48	134.352	148.43
Nitab4.5_0000249g0220.1	1.44714	6.24229	8.96572e-14	3.08695e-12	33.263	48.669	47.353	126.85	111.907	111.031
Nitab4.5_0000022g0230.1	1.44676	4.59555	0.00443305	0.0197218	12.409	6.973	20.257	36.65	19.015	52.602
Nitab4.5_0000039g0180.1	1.44667	4.5701	1.88169e-07	2.50638e-06	13.027	14.737	11.425	30.965	30.602	44.838
Nitab4.5_0000316g0130.1	1.44629	6.90518	2.54593e-10	5.53678e-09	62.211	60.346	82.319	173.488	159.418	222.757
Nitab4.5_0000033g0010.1	1.44572	3.60589	0.0103149	0.0395892	4.885	3.447	10.173	13.945	9.457	28.895
Nitab4.5_0000091g0010.1	1.44528	3.60457	1.28275e-05	0.000117789	6.974	4.417	7.22	18.283	19.127	13.814
Nitab4.5_0000312g0030.1	1.44481	5.02172	1.09369e-12	3.28155e-11	17.333	18.253	19.045	54.146	43.421	50.44
Nitab4.5_0000068g0480.1	1.44438	6.42706	1.53798e-16	7.38563e-15	46.31	54.077	46.201	148.721	124.682	124.521
Nitab4.5_0001537g0010.1	1.44416	4.86438	2.0256e-12	5.80026e-11	17.255	14.797	16.792	46.066	44.72	40.345
Nitab4.5_0001003g0160.1	1.443	4.25968	5.58542e-06	5.56408e-05	10.986	11.954	8.311	34.695	31.173	19.304
Nitab4.5_0000758g0130.1	1.44209	3.9872	2.62718e-06	2.80061e-05	5.709	11.489	8.261	27.222	18.063	24.615
Nitab4.5_0003148g0040.1	1.44208	2.4881	0.00905983	0.0355608	2.57	2.139	2.263	7.378	3.978	8.425
Nitab4.5_0005554g0010.1	1.44208	2.48781	0.00905983	0.0355608	2.384	2.1	3.154	7.652	6.477	6.353
Nitab4.5_0000005g0420.1	1.44207	2.48715	0.00905983	0.0355608	2.835	3.14	1.582	5.745	8.09	6.308
Nitab4.5_0000137g0290.1	1.44175	4.1297	4.34543e-07	5.40432e-06	5.572	11.499	10.985	23.158	23.251	30.34
Nitab4.5_0000267g0110.1	1.44136	5.90507	7.19782e-12	1.91875e-10	36.196	38.587	27.486	109.234	86.135	81.385
Nitab4.5_0001614g0060.1	1.44066	4.82013	5.30109e-07	6.51216e-06	15.793	14.143	16.332	54.754	42.378	30.06
Nitab4.5_0000131g0390.1	1.43906	5.7789	8.07114e-13	2.4697e-11	28.712	27.108	37.429	92	73.944	86.999
Nitab4.5_0002224g0050.1	1.43886	6.21978	1.36512e-15	5.70877e-14	37.315	46.708	42.426	128.924	107.56	107.692
Nitab4.5_0000072g0030.1	1.43814	3.44681	4.41514e-05	0.000359534	5.228	5.725	6.148	17.949	13.267	13.781
Nitab4.5_0001402g0050.1	1.437	4.01985	3.26318e-07	4.1562e-06	8.642	8.934	8.581	22.812	26.097	22.083
Nitab4.5_0001360g0220.1	1.4366	5.45786	0.00102334	0.0056479	23.817	26.306	24.763	54.206	35.521	110.953
Nitab4.5_0000014g0060.1	1.43623	4.75285	1.6309e-11	4.13346e-10	14.439	14.807	16.181	46.03	38.042	36.995
Nitab4.5_0001422g0090.1	1.43579	8.22356	4.8299e-16	2.16407e-14	172.536	154.178	188.179	535.326	434.901	417.907
Nitab4.5_0000287g0060.1	1.43563	6.61099	3.17762e-12	8.82219e-11	59.67	56.216	51.718	173.261	120.928	158.603
Nitab4.5_0001650g0160.1	1.43513	8.65695	2.73307e-11	6.7314e-10	261.311	208.602	226.99	746.393	484.955	643.364
Nitab4.5_0000300g0210.1	1.43433	6.96594	4.73141e-07	5.85173e-06	56.845	70.359	87.335	239.112	135.483	204.494
Nitab4.5_0000019g0420.1	1.43332	2.92932	0.000940595	0.0052519	1.903	3.912	5.337	8.57	13.032	8.011
Nitab4.5_0000190g0080.1	1.43138	5.15326	5.36728e-09	9.40937e-08	17.774	18.759	22.91	66.208	43.32	52.983
Nitab4.5_0000540g0260.1	1.43061	6.02405	2.18682e-11	5.45292e-10	36.863	30.277	44.319	97.578	87.816	114.179
Nitab4.5_0000880g0140.1	1.4306	4.482	1.51866e-09	2.93965e-08	12.723	9.112	14.409	36.161	33.806	29.578
Nitab4.5_0000181g0010.1	1.43027	4.89673	1.5226e-07	2.06368e-06	13.488	12.36	23.882	46.459	39.051	48.939
Nitab4.5_0002299g0010.1	1.42969	3.90274	0.0014202	0.00749808	7.161	6.061	11.015	14.338	16.651	33.22
Nitab4.5_0002341g0060.1	1.42953	5.15198	9.08153e-14	3.11503e-12	20.423	19.482	20.297	59.903	49.729	51.751
Nitab4.5_0002050g0100.1	1.42867	8.34804	3.40981e-19	2.0616e-17	178.922	183.614	200.725	538.055	443.013	528.938
Nitab4.5_0000106g0400.1	1.42838	5.08212	3.36462e-14	1.2132e-12	18.628	18.541	19.306	52.18	49.023	52.311
Nitab4.5_0002194g0020.1	1.42838	2.58139	0.00764991	0.0309278	3.09	2.159	2.613	8.164	7.261	6.151
Nitab4.5_0002315g0180.1	1.42837	2.58104	0.00764991	0.0309278	2.393	1.971	3.645	6.555	9.155	5.77
Nitab4.5_0001996g0010.1	1.42782	6.21117	6.87092e-09	1.18183e-07	41.317	47.986	38.21	98.877	95.38	146.783
Nitab4.5_0000218g0070.1	1.42756	6.28875	3.55335e-09	6.40848e-08	53.422	44.906	36.318	103.561	107.179	148.979
Nitab4.5_0000059g0300.1	1.42731	8.03449	8.95256e-15	3.47591e-13	150.887	132.033	171.046	457.223	355.657	402.58
Nitab4.5_0002107g0050.1	1.427	3.93977	9.52977e-07	1.11735e-05	7.651	7.171	9.342	25.458	18.108	23.293
Nitab4.5_0001040g0050.1	1.4262	4.39685	3.43796e-09	6.22835e-08	11.722	12.123	10.534	32.109	31.465	29.814
Nitab4.5_0000446g0160.1	1.42618	6.17734	1.36696e-11	3.50882e-10	36.265	54.126	34.125	112.476	116.39	104.331
Nitab4.5_0000697g0210.1	1.42451	10.0882	3.83064e-11	9.27531e-10	634.016	677.793	576.752	1848.18	1257.02	1937.93
Nitab4.5_0000303g0060.1	1.42294	6.0902	1.25723e-18	7.31487e-17	35.441	41.637	39.773	103.394	103.235	105.978
Nitab4.5_0000264g0100.1	1.42257	4.55445	3.57596e-10	7.6119e-09	12.634	12.667	12.717	37.83	33.157	34.015
Nitab4.5_0000436g0080.1	1.42212	3.3242	8.84646e-05	0.000670094	4.964	5.21	5.277	14.422	13.088	13.467
Nitab4.5_0000262g0190.1	1.41765	11.1942	1.23641e-20	8.44348e-19	1276.78	1419.93	1382	3766.86	3921.64	3159.81
Nitab4.5_0001740g0130.1	1.41744	3.63546	0.000297446	0.00193978	5.67	5.398	8.611	18.522	11.441	22.766
Nitab4.5_0002747g0010.1	1.41705	8.60165	7.79668e-13	2.38936e-11	195.48	230.876	249.269	637.361	492.63	667.015
Nitab4.5_0000836g0080.1	1.41688	7.47053	2.44959e-07	3.20329e-06	94.523	100.201	113.78	367.416	190.995	262.531
Nitab4.5_0000031g0530.1	1.41632	7.08543	5.42935e-12	1.45895e-10	74.237	83.284	78.263	226.538	164.864	235.854
Nitab4.5_0003825g0030.1	1.41565	3.85289	1.89e-06	2.07993e-05	9.868	6.259	6.699	24.85	19.139	17.613
Nitab4.5_0000008g0730.1	1.41519	4.64621	1.19618e-07	1.64684e-06	15.685	14.084	12.036	48.056	33.044	31.528
Nitab4.5_0000363g0120.1	1.41496	5.92684	4.04335e-11	9.75506e-10	36.461	31.406	36.799	113.823	81.026	85.408
Nitab4.5_0000638g0170.1	1.4139	3.63434	0.00051468	0.00310806	5.817	2.803	10.524	18.653	20.013	13.288
Nitab4.5_0001531g0030.1	1.41365	5.18992	4.80054e-06	4.86182e-05	18.942	18.253	25.093	71.691	37.022	56.188
Nitab4.5_0000030g0070.1	1.41311	4.20912	3.73564e-06	3.85134e-05	9.868	9.468	10.644	22.121	35.297	22.856
Nitab4.5_0001051g0070.1	1.41249	5.48079	7.26236e-08	1.045e-06	30.34	28.009	18.214	63.085	56.789	82.887
Nitab4.5_0000456g0120.1	1.41088	6.24772	6.58689e-16	2.87432e-14	40.434	42.41	48.204	122.297	122.104	103.917
Nitab4.5_0001159g0090.1	1.41031	3.42935	6.55985e-05	0.000513093	6.278	6.517	3.555	17.544	13.424	13.949
Nitab4.5_0002115g0020.1	1.40986	6.13167	8.41638e-08	1.19732e-06	39.669	47.302	34.566	107.399	79.143	135.388
Nitab4.5_0001203g0010.1	1.40907	6.73336	1.18632e-11	3.06473e-10	58.336	71.32	54.973	167.493	187.409	134.66
Nitab4.5_0000342g0130.1	1.40905	3.12968	0.000587835	0.00349308	4.601	3.288	4.846	13.087	12.931	9.064
Nitab4.5_0001863g0050.1	1.40783	4.44054	1.38543e-08	2.25728e-07	11.506	11.093	13.758	33.932	26.344	35.629
Nitab4.5_0003176g0020.1	1.40781	5.27989	3.48124e-13	1.11628e-11	21.718	24.711	20.577	53.574	59.22	63.706
Nitab4.5_0000216g0100.1	1.40698	5.53106	2.68642e-12	7.51037e-11	25.681	25.533	28.327	79.76	59.287	71.997
Nitab4.5_0000577g0100.1	1.40678	3.72077	6.43978e-06	6.34253e-05	6.994	5.992	7.69	21.728	14.365	19.898
Nitab4.5_0000402g0040.1	1.40621	5.18563	6.85685e-08	9.90199e-07	14.93	26.989	20.547	49.832	66.302	48.984
Nitab4.5_0001322g0020.1	1.4062	5.77762	3.292e-09	5.99639e-08	29.3	26.038	39.462	98.508	84.869	67.414
Nitab4.5_0001231g0070.1	1.4051	3.47901	5.63011e-05	0.000448643	5.886	5.754	5.507	16.567	15.71	14.05
Nitab4.5_0001317g0070.1	1.40423	8.2501	6.22444e-10	1.27885e-08	163.188	194.865	175.452	536.136	345.09	523.84
Nitab4.5_0001740g0100.1	1.40409	4.3252	1.46495e-08	2.37144e-07	9.24	11.41	12.046	29.666	27.666	30.43
Nitab4.5_0003658g0030.1	1.40409	10.5071	1.14251e-14	4.3683e-13	799.597	825.167	925.353	2402.79	2492.43	1826.19
Nitab4.5_0000477g0200.1	1.40392	8.54061	8.21814e-11	1.92264e-09	198.913	262.54	190.462	481.12	672.599	562.617
Nitab4.5_0002456g0040.1	1.40218	5.50151	2.31378e-15	9.53685e-14	27.878	25.83	23.561	72.954	64.363	68.68
Nitab4.5_0003393g0070.1	1.40153	4.35263	8.61305e-09	1.46269e-07	11.134	11.816	11.285	33.241	27.879	28.536
Nitab4.5_0001336g0050.1	1.40097	4.77182	2.12085e-11	5.31484e-10	17.147	14.52	14.239	40.774	39.532	41.567
Nitab4.5_0000970g0010.1	1.40061	4.89603	8.14141e-11	1.90691e-09	14.842	15.589	19.536	50.332	39.566	43.068
Nitab4.5_0004905g0080.1	1.40021	9.43442	2.24266e-17	1.15428e-15	386.389	393.721	434.464	1208.61	925.055	1059.13
Nitab4.5_0000622g0190.1	1.39982	5.22855	1.79631e-09	3.43951e-08	20.707	21.839	21.659	66.709	44.474	58.675
Nitab4.5_0001456g0130.1	1.39936	5.55091	3.40938e-09	6.18215e-08	28.761	20.125	32.152	77.257	57.349	77.834
Nitab4.5_0001148g0060.1	1.39823	2.8311	0.00164793	0.00850136	3.688	3.209	3.555	10.786	8.594	7.551
Nitab4.5_0000040g0620.1	1.3976	3.24962	0.000727483	0.00421315	4.954	5.843	3.404	12.395	8.494	17.344
Nitab4.5_0001352g0030.1	1.39619	4.02969	2.72846e-05	0.000234354	10.113	9.181	6.949	21.358	31.151	17.512
Nitab4.5_0000050g0060.1	1.39609	5.56097	4.33275e-14	1.54753e-12	28.251	22.611	30.951	72.227	75.244	66.91
Nitab4.5_0003018g0070.1	1.39491	4.06446	2.81811e-07	3.63314e-06	10.623	8.329	8.161	25.637	22.366	25.287
Nitab4.5_0000303g0210.1	1.39442	4.60918	1.33314e-06	1.51102e-05	13.272	11.439	16.352	47.126	29.38	31.674
Nitab4.5_0002247g0120.1	1.39414	4.72359	6.07801e-11	1.43873e-09	13.527	16.084	14.98	40.941	41.684	35.606
Nitab4.5_0001952g0060.1	1.39132	3.30575	0.000131931	0.000946817	5.993	6.042	3.825	16.495	12.169	11.708
Nitab4.5_0001382g0010.1	1.39132	3.30576	0.000131931	0.000946817	4.758	5.13	4.856	13.194	10.656	15.977
Nitab4.5_0001267g0010.1	1.39131	3.3055	0.000131931	0.000946817	4.689	5.536	5.227	11.823	11.676	16.593
Nitab4.5_0004821g0040.1	1.39109	6.83309	1.53891e-06	1.7238e-05	61.514	74.361	64.776	232.676	115.594	175.779
Nitab4.5_0000316g0280.1	1.38933	4.1296	2.0936e-07	2.7648e-06	9.201	9.122	9.853	29.654	20.058	26.329
Nitab4.5_0000080g0160.1	1.38927	8.35864	2.47461e-09	4.60787e-08	179.923	165.945	233.168	623.369	420.11	468.201
Nitab4.5_0001968g0030.1	1.38869	3.9148	2.05985e-06	2.24226e-05	8.573	7.597	8.331	23.837	18.287	22.498
Nitab4.5_0003987g0060.1	1.38821	9.07809	3.63433e-08	5.49213e-07	266.804	291.51	394.982	1007.02	639.678	841.83
Nitab4.5_0002152g0100.1	1.38712	6.35902	3.97961e-10	8.39987e-09	45.476	36.596	61.952	129.615	113.622	132.106
Nitab4.5_0000644g0080.1	1.38684	5.10412	4.62004e-07	5.72104e-06	22.051	20.294	16.732	56.971	36.843	61.566
Nitab4.5_0003803g0030.1	1.38607	6.67309	8.87246e-09	1.49545e-07	51.018	54.008	73.567	159.257	125.186	182.927
Nitab4.5_0003971g0020.1	1.38418	3.70644	9.51764e-06	9.05009e-05	6.513	7.329	6.989	21.37	15.396	18.038
Nitab4.5_0000232g0130.1	1.38382	5.20226	8.05759e-12	2.12257e-10	17.323	22.175	24.272	55.493	50.502	60.154
Nitab4.5_0002977g0020.1	1.38378	3.98647	1.32616e-05	0.000121608	7.543	8.359	10.203	23.945	16.416	28.088
Nitab4.5_0000452g0100.1	1.38183	6.95661	1.40094e-14	5.32597e-13	60.524	79.689	79.335	193.416	174.758	201.57
Nitab4.5_0000178g0150.1	1.38137	4.42414	0.00141417	0.00747412	7.347	8.696	20.227	34.564	22.041	38.407
Nitab4.5_0001856g0050.1	1.37941	6.74817	1.10179e-06	1.26958e-05	41.562	64.516	83.1	177.409	137.59	177.022
Nitab4.5_0000247g0090.1	1.37912	4.62311	1.4034e-09	2.72442e-08	12.124	14.569	15.15	42.228	33.549	33.253
Nitab4.5_0000386g0020.1	1.3789	2.45491	0.0135556	0.0495178	2.021	2.08	2.684	6.615	5.782	6.902
Nitab4.5_0000832g0020.1	1.37863	3.04485	0.00143921	0.00757451	3.267	2.823	5.617	13.265	6.835	12.291
Nitab4.5_0001485g0130.1	1.37775	5.28994	7.50914e-13	2.30828e-11	24.514	21.849	21.919	65.421	54.189	56.244
Nitab4.5_0003498g0020.1	1.37765	4.52338	7.52712e-06	7.32034e-05	12.193	15.272	11.575	44.755	24.753	31.842
Nitab4.5_0001466g0040.1	1.3762	6.92295	3.71979e-12	1.02144e-10	67.841	80.67	66.628	197.242	207.041	151.231
Nitab4.5_0000046g0140.1	1.37522	4.97364	2.84956e-10	6.15044e-09	18.893	17.035	18.004	55.076	45.415	39.471
Nitab4.5_0001863g0080.1	1.37479	7.47677	3.50989e-18	1.92497e-16	107.716	98.467	110.326	275.69	247.906	292.053
Nitab4.5_0002527g0030.1	1.37449	5.13051	5.93437e-09	1.02868e-07	20.884	19.155	21.378	57.507	40.485	58.63
Nitab4.5_0000315g0160.1	1.37401	3.78697	0.00281351	0.0133797	5.886	6.586	10.103	22.991	25.985	9.322
Nitab4.5_0000057g0270.1	1.37291	4.15037	8.6302e-06	8.29665e-05	11.359	9.161	8.351	33.992	20.315	22.901
Nitab4.5_0000185g0210.1	1.37029	2.55074	0.0113545	0.0428436	2.766	1.991	2.583	8.772	7.026	5.355
Nitab4.5_0005169g0020.1	1.37029	2.55058	0.0113545	0.0428436	2.678	3.001	2.313	7.938	6.634	6.431
Nitab4.5_0001401g0110.1	1.37019	8.74319	0.00093691	0.0052386	274.073	255.379	234.29	662.617	1000.81	302.506
Nitab4.5_0000020g0090.1	1.36995	3.17152	0.00152886	0.00796699	3.767	4.932	5.117	17.091	8.034	11.607
Nitab4.5_0000038g0180.1	1.36959	7.92547	1.15562e-08	1.90606e-07	104.665	181.019	147.164	330.873	382.695	398.995
Nitab4.5_0001653g0120.1	1.36944	8.04153	8.73884e-17	4.27841e-15	157.371	165.974	146.223	417.403	349.37	439.811
Nitab4.5_0000027g0520.1	1.36939	8.16516	5.66106e-24	5.36012e-22	169.289	169.916	171.707	445.471	414.619	455.384
Nitab4.5_0000071g0170.1	1.36895	5.9431	3.5663e-15	1.44327e-13	35.981	33.922	38.661	100.772	84.242	94.741
Nitab4.5_0002415g0020.1	1.36812	5.35629	3.61975e-07	4.56977e-06	20.335	21.789	29.809	78.663	49.494	56.905
Nitab4.5_0003838g0010.1	1.36807	3.17008	0.000734248	0.00424467	4.326	5.388	4.346	11.966	12.438	11.473
Nitab4.5_0000127g0100.1	1.36779	5.56618	3.17688e-06	3.32653e-05	24.464	28.375	30.35	96.088	69.137	49.454
Nitab4.5_0001119g0040.1	1.36686	6.55827	1.40326e-07	1.91486e-06	41.258	65.962	60.2	123.835	178.288	127.333
Nitab4.5_0000519g0310.1	1.3651	3.28821	0.00600061	0.0254175	4.718	4.417	6.008	17.675	5.872	15.82
Nitab4.5_0002320g0050.1	1.36429	6.61554	9.23812e-17	4.51185e-15	57.953	58.108	58.417	160.532	134.52	152.463
Nitab4.5_0001057g0060.1	1.36426	3.97387	2.20565e-06	2.3816e-05	8.299	8.557	8.862	24.719	20.663	22.722
Nitab4.5_0000846g0010.1	1.36408	3.64889	3.00536e-05	0.000255404	6.013	5.834	8.892	17.151	14.32	20.705
Nitab4.5_0001040g0090.1	1.36376	3.22999	0.000425029	0.00264875	4.924	4.526	5.017	14.553	11.362	12.313
Nitab4.5_0000316g0200.1	1.36376	3.22988	0.000425029	0.00264875	4.444	5.487	4.706	13.42	10.69	13.277
Nitab4.5_0001808g0020.1	1.3637	5.69325	3.20285e-05	0.000270698	26.063	26.791	38.541	103.215	82.124	49.32
Nitab4.5_0001584g0050.1	1.36343	5.78838	6.574e-07	7.9494e-06	30.87	38.369	28.137	105.182	58.525	86.92
Nitab4.5_0000694g0140.1	1.36339	4.7898	3.4002e-06	3.54189e-05	14.057	17.61	17.012	36.602	54.2	31.651
Nitab4.5_0002601g0050.1	1.36302	2.64023	0.00949755	0.0369108	2.894	3.14	3.034	7.497	7.788	7.63
Nitab4.5_0000009g0350.1	1.36302	2.63959	0.00949755	0.0369108	4.375	2.456	2.353	5.638	9.513	7.451
Nitab4.5_0001551g0040.1	1.3628	3.69215	0.00248501	0.0120284	4.777	8.835	7.28	15.137	11.351	27.326
Nitab4.5_0000283g0010.1	1.3614	5.03627	7.00281e-13	2.1726e-11	19.707	20.413	17.593	50.309	46.771	49.353
Nitab4.5_0001443g0070.1	1.35985	3.28737	0.00019582	0.00134375	6.229	3.427	5.247	16.186	9.525	14.24
Nitab4.5_0000856g0170.1	1.35978	6.76377	2.89302e-14	1.05585e-12	67.312	67.953	58.607	186.026	143.686	166.255
Nitab4.5_0000465g0130.1	1.35713	6.20211	9.33339e-14	3.19164e-12	39.306	44.896	47.313	125.396	110.462	98.897
Nitab4.5_0004391g0030.1	1.35666	5.65379	7.29003e-09	1.25071e-07	27.221	26.117	35.297	90.915	61.17	75.268
Nitab4.5_0003603g0050.1	1.35461	5.73168	1.19495e-07	1.64627e-06	21.492	32.595	40.093	76.732	70.504	92.791
Nitab4.5_0000976g0220.1	1.35426	7.58151	4.26977e-20	2.7827e-18	114.828	124.674	104.508	305.082	287.752	282.138
Nitab4.5_0001208g0040.1	1.35405	4.13896	3.83743e-07	4.8173e-06	10.349	9.855	9.072	29.01	23.453	23.159
Nitab4.5_0000753g0020.1	1.35376	7.15488	9.09155e-14	3.11503e-12	93.463	71.013	90.46	231.46	193.359	224.885
Nitab4.5_0000255g0020.1	1.35147	4.88232	3.26097e-11	7.95178e-10	15.567	16.5	19.035	47.365	39.6	43.595
Nitab4.5_0000006g0300.1	1.35131	4.48238	0.00131481	0.00700343	8.564	10.855	19.025	32.717	20.394	44.715
Nitab4.5_0000302g0110.1	1.35092	7.80554	1.85444e-08	2.956e-07	106.843	124.803	170.075	371.945	282.43	366.828
Nitab4.5_0000622g0230.1	1.35087	7.42712	6.22739e-14	2.18918e-12	86.548	113.343	108.353	271.638	279.528	233.972
Nitab4.5_0000677g0040.1	1.35038	11.0177	1.68595e-12	4.91891e-11	1203.49	1329.51	1201.14	3491.03	3525.2	2463.38
Nitab4.5_0000068g0430.1	1.34998	4.48079	3.69254e-08	5.5646e-07	11.771	10.33	16.312	30.238	30.355	36.346
Nitab4.5_0000041g0190.1	1.34996	3.44546	0.00012177	0.000883368	5.964	6.309	5.267	15.22	14.791	15.069
Nitab4.5_0000468g0280.1	1.34897	5.95744	1.45624e-13	4.87184e-12	33.077	36.814	40.283	94.348	83.737	102.236
Nitab4.5_0004279g0020.1	1.34836	4.64967	0.00026376	0.00174504	13.331	15.629	14.149	36.006	52.441	21.982
Nitab4.5_0000116g0260.1	1.34749	6.32399	1.24271e-10	2.82502e-09	40.051	44.024	58.427	137.815	108.714	116.723
Nitab4.5_0003006g0020.1	1.34613	4.99086	2.64558e-11	6.53194e-10	18.667	18.065	18.715	51.941	41.213	47.348
Nitab4.5_0001083g0130.1	1.34437	4.64587	3.27556e-05	0.000276146	11.124	15.342	17.553	41.036	24.383	44.289
Nitab4.5_0001190g0010.1	1.34342	7.89222	0.013041	0.0479083	95.994	115.859	215.865	390.836	142.688	549.284
Nitab4.5_0002415g0050.1	1.34297	5.66764	5.84115e-09	1.01427e-07	25.092	26.702	38.18	89.986	69.383	69.274
Nitab4.5_0001591g0190.1	1.34145	8.83563	1.55949e-14	5.90634e-13	250.932	269.176	304.983	784.461	603.339	695.485
Nitab4.5_0000003g0230.1	1.34036	3.02202	0.00388662	0.0176587	4.218	3.397	4.696	10.786	5.58	14.789
Nitab4.5_0001186g0040.1	1.34013	4.70974	1.10557e-07	1.53366e-06	15.371	15.46	15.11	40.929	29.806	45.454
Nitab4.5_0000533g0010.1	1.34002	3.634	0.000698043	0.00406258	5.258	6.2	8.601	14.255	12.337	24.088
Nitab4.5_0000309g0300.1	1.33996	3.63313	4.37542e-05	0.000356733	6.602	6.527	7.159	17.044	19.161	14.431
Nitab4.5_0005839g0010.1	1.33965	5.12352	2.51057e-12	7.05806e-11	19.57	21.304	20.667	56.995	50.603	47.404
Nitab4.5_0000840g0020.1	1.33947	4.42195	2.14249e-08	3.37569e-07	11.977	11.964	12.416	32.991	27.621	31.931
Nitab4.5_0006280g0030.1	1.33868	4.31302	0.000610956	0.00361869	9.368	12.509	11.976	25.709	42.054	17.646
Nitab4.5_0000795g0080.1	1.33746	5.79279	4.59543e-13	1.43907e-11	29.114	36.893	33.404	93.43	77.642	78.909
Nitab4.5_0001431g0010.1	1.33721	5.92084	7.60647e-14	2.6416e-12	34.136	39.488	34.586	96.41	80.779	96.186
Nitab4.5_0000132g0180.1	1.33706	4.75109	2.92228e-10	6.30063e-09	16.068	14.262	16.522	43.861	35.678	38.911
Nitab4.5_0002660g0010.1	1.33568	3.08683	0.00127	0.00680171	4.493	4.051	4.155	10.739	11.452	10.868
Nitab4.5_0001696g0030.1	1.33525	5.65005	3.47619e-11	8.44764e-10	26.534	30.554	32.543	70.26	87.659	67.806
Nitab4.5_0000135g0070.1	1.33489	5.44214	3.44283e-11	8.37672e-10	25.906	26.682	24.362	71.023	54.637	69.431
Nitab4.5_0001149g0010.1	1.33473	6.25516	4.17017e-16	1.88531e-14	42.474	48.768	46.391	110.355	112.894	122.627
Nitab4.5_0000607g0040.1	1.33274	3.14943	0.00107165	0.0058758	4.728	4.001	4.456	11.204	11.777	11.82
Nitab4.5_0000172g0530.1	1.33148	7.49139	7.89953e-18	4.15098e-16	105.882	108.976	111.027	300.791	250.327	266.295
Nitab4.5_0001160g0060.1	1.33008	3.20982	0.000903403	0.00508382	4.159	6.012	4.546	13.373	12.393	10.397
Nitab4.5_0000130g0190.1	1.32857	5.19545	3.44835e-13	1.1075e-11	23.13	20.67	21.318	57.96	53.662	52.177
Nitab4.5_0000312g0240.1	1.32798	6.51182	4.22529e-05	0.000345898	53.735	52.492	58.848	129.353	197.807	86.181
Nitab4.5_0000499g0030.1	1.32789	4.36042	4.23314e-08	6.30354e-07	11.604	11.212	12.957	32.443	28.17	28.828
Nitab4.5_0000026g0340.1	1.32767	3.26771	0.000289227	0.00189294	5.729	5.665	3.505	13.242	11.34	14.095
Nitab4.5_0000492g0110.1	1.32581	5.55009	2.06079e-07	2.72325e-06	22.993	27.048	33.855	85.504	54.312	69.879
Nitab4.5_0001140g0090.1	1.32507	5.6315	1.64218e-09	3.16956e-08	23.493	38.993	26.215	69.069	80.488	72.299
Nitab4.5_0000602g0090.1	1.32504	4.43777	2.64971e-08	4.11988e-07	13.164	14.302	10.364	31.465	33.896	28.279
Nitab4.5_0000524g0070.1	1.32462	4.46453	1.07893e-07	1.50101e-06	12.487	12.559	13.488	38.569	27.8	29.556
Nitab4.5_0000006g0560.1	1.3244	3.9496	0.000852238	0.00483111	5.66	8.567	11.465	15.041	18.948	30.968
Nitab4.5_0005517g0020.1	1.32424	7.47948	3.52204e-13	1.12576e-11	108.776	109.639	105.96	318.502	230.157	262.295
Nitab4.5_0000759g0270.1	1.32344	3.3767	0.000209455	0.00142377	4.64	6.022	6.258	13.814	14.152	14.296
Nitab4.5_0001941g0060.1	1.32227	6.23916	4.33649e-13	1.36436e-11	43.995	45.599	47.222	124.693	96.354	119.893
Nitab4.5_0003258g0010.1	1.32158	3.42853	0.00017788	0.0012355	5.16	5.853	6.859	14.29	13.502	15.54
Nitab4.5_0000084g0230.1	1.32138	8.67389	1.99532e-12	5.72172e-11	228.332	236.373	280.751	728.777	539.782	587.064
Nitab4.5_0001105g0150.1	1.32134	5.70789	1.02554e-08	1.71261e-07	28.27	29.237	36.618	78.997	92.713	62.092
Nitab4.5_0000251g0050.1	1.31962	5.58106	3.05323e-08	4.71442e-07	27.476	28.593	29.739	87.65	54.413	73.117
Nitab4.5_0001203g0040.1	1.319	7.1151	1.39948e-13	4.71338e-12	68.567	90.891	93.003	220.018	199.724	207.732
Nitab4.5_0006642g0040.1	1.31852	4.99027	2.92086e-11	7.16753e-10	17.363	18.778	20.297	51.31	42.782	46.485
Nitab4.5_0002826g0070.1	1.31774	7.49769	2.19921e-14	8.14479e-13	101.477	115.245	113.4	308.621	238.651	271.92
Nitab4.5_0000249g0400.1	1.31675	8.8355	3.13598e-16	1.44329e-14	244.331	295.016	295.741	710.709	738.341	623.723
Nitab4.5_0002135g0090.1	1.31646	5.05811	3.52261e-12	9.6862e-11	18.383	20.284	20.938	53.324	46.502	47.37
Nitab4.5_0001740g0110.1	1.31629	4.71503	6.17483e-10	1.26995e-08	13.174	17.184	15.761	35.732	39.779	38.777
Nitab4.5_0002257g0150.1	1.31544	3.61794	6.34465e-05	0.000498264	6.013	7.963	6.649	17.437	20.282	12.941
Nitab4.5_0001499g0140.1	1.31534	5.41543	3.1937e-10	6.82717e-09	26.779	24.929	25.554	62.883	53.113	73.464
Nitab4.5_0001619g0090.1	1.31513	4.75654	4.5249e-10	9.44175e-09	14.9	15.966	16.882	40.154	42.692	35.203
Nitab4.5_0000846g0030.1	1.31339	8.20362	1.52479e-13	5.0674e-12	157.047	180.682	201.476	487.961	460.146	388.822
Nitab4.5_0001367g0020.1	1.31168	7.18401	4.73629e-08	7.01117e-07	89.51	103.618	73.047	202.45	180.305	274.328
Nitab4.5_0000200g0100.1	1.31005	6.34666	3.63902e-16	1.65637e-14	45.172	47.659	55.243	124.872	123.113	118.661
Nitab4.5_0000383g0110.1	1.30983	3.82652	1.08834e-05	0.000101563	8.662	8.3	7.119	24.779	16.517	19.237
Nitab4.5_0003298g0050.1	1.30936	8.24652	3.51759e-09	6.36113e-08	137.841	226.301	193.095	476.221	420.905	477.624
Nitab4.5_0001256g0060.1	1.30927	5.27286	1.8876e-09	3.59828e-08	17.951	25.652	26.315	55.314	65.069	51.538
Nitab4.5_0002987g0010.1	1.30927	4.52916	7.95241e-09	1.35739e-07	11.595	13.004	15.791	35.291	29.593	35.393
Nitab4.5_0002315g0110.1	1.30884	4.75238	0.000510841	0.00309138	13.115	14.381	20.467	46.232	21.794	50.306
Nitab4.5_0001488g0140.1	1.30794	5.70875	2.17341e-11	5.43298e-10	32.645	29.713	32.713	89.008	78.628	66.07
Nitab4.5_0000923g0140.1	1.3079	5.05216	4.04362e-12	1.10132e-10	20.609	19.224	18.645	52.692	45.796	48.479
Nitab4.5_0002027g0020.1	1.3067	5.49991	2.73929e-12	7.64754e-11	26.554	26.9	28.137	74.444	59.209	67.784
Nitab4.5_0000892g0110.1	1.30642	5.16508	1.01069e-09	2.01067e-08	21.767	20.66	21.889	62.68	50.121	46.082
Nitab4.5_0000818g0040.1	1.30624	4.66581	2.15302e-09	4.06181e-08	14.596	13.182	17.263	40.821	35.039	35.797
Nitab4.5_0001422g0080.1	1.30565	4.00769	1.88408e-06	2.07455e-05	8.181	9.171	9.823	24.099	21.402	22.845
Nitab4.5_0000306g0350.1	1.30494	4.04135	1.60803e-06	1.79222e-05	9.132	8.934	9.833	25.47	22.187	22.329
Nitab4.5_0000103g0390.1	1.30485	4.72557	0.0054798	0.0236043	12.978	20.957	12.907	58.699	17.929	40.222
Nitab4.5_0001243g0050.1	1.30248	6.23991	4.40747e-14	1.57142e-12	50.145	41.707	45.62	124.371	112.804	102.023
Nitab4.5_0000306g0010.1	1.3021	4.94348	1.92457e-07	2.55841e-06	14.94	16.797	22.99	51.405	36.485	47.762
Nitab4.5_0006695g0060.1	1.30139	4.92425	5.19948e-10	1.07819e-08	13.498	22.275	18.204	45.911	41.292	46.362
Nitab4.5_0001370g0040.1	1.30042	4.99574	1.6726e-10	3.72688e-09	18.667	17.867	20.067	50.607	40.619	49.152
Nitab4.5_0001944g0050.1	1.30035	5.06407	3.94396e-09	7.0559e-08	19.658	20.026	20.487	58.163	40.507	49.107
Nitab4.5_0000322g0110.1	1.29916	6.79074	9.77099e-10	1.9477e-08	53.726	71.429	78.394	191.545	161.872	145.416
Nitab4.5_0000758g0070.1	1.29903	6.95449	2.5132e-07	3.27794e-06	66.203	64.278	96.748	220.543	148.638	190.008
Nitab4.5_0003328g0090.1	1.2987	2.99858	0.00219964	0.0108886	3.767	4.308	4.226	11.037	9.928	9.512
Nitab4.5_0001725g0160.1	1.29865	4.39583	1.21249e-07	1.66815e-06	10.094	10.558	15.701	33.146	26.534	31.113
Nitab4.5_0000496g0220.1	1.29766	5.15928	2.47713e-11	6.13984e-10	17.941	24.642	22.049	52.847	49.438	55.168
Nitab4.5_0003298g0010.1	1.29756	3.06513	0.00185022	0.00939765	5.032	3.773	4.436	9.451	8.337	14.991
Nitab4.5_0000203g0240.1	1.29736	4.47171	2.82057e-07	3.63398e-06	9.25	15.589	13.528	35.816	33.313	27.203
Nitab4.5_0001891g0010.1	1.29727	6.12028	1.09235e-12	3.28155e-11	39.845	46.163	41.485	113.871	89.564	108.723
Nitab4.5_0000679g0060.1	1.29653	3.12921	0.00155508	0.00808471	4.041	4.011	4.937	12.014	8.606	14.285
Nitab4.5_0000212g0080.1	1.29635	5.57669	5.61281e-07	6.85733e-06	29.251	25.87	30.941	83.717	50.357	78.495
Nitab4.5_0000036g0570.1	1.29518	3.24901	0.00115481	0.00626502	5.454	2.981	6.469	13.683	8.191	15.338
Nitab4.5_0000208g0030.1	1.29317	5.56352	2.39969e-12	6.78435e-11	25.955	31.416	29.299	75.6	63.108	72.355
Nitab4.5_0000249g0370.1	1.29258	3.77448	0.000407546	0.00256126	8.426	6.953	7.61	26.948	12.393	17.03
Nitab4.5_0004281g0090.1	1.29205	3.46173	0.000218739	0.00148086	7.298	5.606	4.826	17.437	13.592	14.016
Nitab4.5_0000590g0040.1	1.29204	3.46193	0.000218739	0.00148086	6.023	6.111	6.248	16.841	13.727	14.095
Nitab4.5_0004708g0030.1	1.29071	3.69181	0.000178068	0.00123602	6.396	8.022	7.36	23.301	12.796	17.075
Nitab4.5_0001151g0020.1	1.29015	8.53804	1.91347e-05	0.000169727	184.788	209.305	294.129	762.793	497.337	420.069
Nitab4.5_0000344g0070.1	1.29007	3.64762	7.74787e-05	0.000593599	8.779	7.359	5.067	20.798	16.573	13.971
Nitab4.5_0003290g0030.1	1.28922	5.96477	0.00902886	0.0354948	31.929	41.053	41.014	74.837	162.768	40.603
Nitab4.5_0002470g0100.1	1.2889	3.7732	2.67851e-05	0.000230655	7.023	7.28	8.491	18.677	17.839	20.156
Nitab4.5_0001565g0100.1	1.28853	6.16769	0.005415	0.0233703	51.862	55.879	24.603	111.642	155.9	54.137
Nitab4.5_0001423g0140.1	1.28826	7.05595	7.54508e-07	9.01503e-06	73.648	87.127	85.333	192.975	261.084	144.217
Nitab4.5_0002467g0040.1	1.28794	3.88948	1.13473e-05	0.000105256	7.102	9.003	9.412	23.897	16.057	22.778
Nitab4.5_0000962g0010.1	1.28756	4.09683	2.7443e-05	0.000235394	7.798	8.934	12.917	28.998	17.66	25.825
Nitab4.5_0000859g0170.1	1.28664	4.06327	1.97994e-06	2.16349e-05	10.525	8.567	9.122	25.244	20.584	24.727
Nitab4.5_0002314g0110.1	1.28664	4.12843	6.08417e-06	6.02801e-05	6.867	10.023	13.127	29.499	20.595	24.369
Nitab4.5_0003720g0010.1	1.28563	4.2191	6.12681e-07	7.43103e-06	10.82	11.39	10.504	28.569	23.139	28.021
Nitab4.5_0001244g0180.1	1.28554	5.79691	1.49553e-11	3.80479e-10	33.705	39.716	27.907	89.104	85.978	73.173
Nitab4.5_0000319g0350.1	1.28545	4.24718	5.2066e-07	6.40393e-06	12.046	12.113	8.501	24.171	27.935	28.368
Nitab4.5_0003496g0050.1	1.28502	4.33301	2.26305e-07	2.96903e-06	10.31	13.311	12.577	30.643	24.047	31.73
Nitab4.5_0002261g0030.1	1.28448	6.0793	6.225e-12	1.66935e-10	36.285	42.202	46.431	106.481	88.6	107.58
Nitab4.5_0001615g0080.1	1.2835	4.62818	7.42233e-09	1.27232e-07	14.459	17.996	11.725	37.925	34.176	35.741
Nitab4.5_0001450g0190.1	1.28255	6.46068	1.45081e-13	4.86177e-12	51.097	49.392	62.473	136.004	121.051	137.103
Nitab4.5_0000368g0120.1	1.28124	5.48207	1.15658e-12	3.44962e-11	31.017	25.394	25.464	69.247	61.136	67.773
Nitab4.5_0006134g0010.1	1.27964	5.90872	3.87541e-05	0.000320656	30.252	44.44	36.228	98.233	57.013	113.149
Nitab4.5_0000651g0010.1	1.27913	6.60707	1.47157e-10	3.31153e-09	68.763	61.564	50.937	154.787	122.575	159.163
Nitab4.5_0001800g0070.1	1.27725	10.4712	5.32425e-14	1.8849e-12	798.773	1043.52	807.827	2290.05	2057.11	2045.02
Nitab4.5_0000836g0120.1	1.27615	7.512	7.51774e-16	3.25223e-14	103.155	119.821	116.474	292.507	249.419	278.149
Nitab4.5_0000101g0270.1	1.27608	9.11327	1.9658e-10	4.35054e-09	309.445	374.487	349.782	677.515	834.684	977.488
Nitab4.5_0001831g0040.1	1.27493	6.12078	3.89377e-11	9.41682e-10	41.435	45.005	42.877	111.904	113.924	84.971
Nitab4.5_0001843g0100.1	1.27473	7.37682	2.57129e-15	1.05334e-13	95.19	97.418	116.975	252.783	235.816	257.119
Nitab4.5_0000699g0170.1	1.27204	4.1493	0.000216314	0.00146791	6.837	14.678	10.183	32.717	18.478	24.066
Nitab4.5_0000302g0140.1	1.27186	7.48936	2.054e-07	2.71606e-06	114.436	114.175	106.27	326.726	188.025	293.061
Nitab4.5_0003495g0030.1	1.27164	4.32365	1.54355e-05	0.000139692	11.035	13.787	10.914	29.189	21.548	35.528
Nitab4.5_0002715g0130.1	1.27073	5.69452	6.98405e-11	1.64737e-09	30.262	31.01	34.365	87.924	66.156	75.783
Nitab4.5_0001556g0040.1	1.27069	4.2676	6.3459e-06	6.26568e-05	9.564	13.341	11.305	27.866	20.875	32.984
Nitab4.5_0001600g0100.1	1.2702	4.66387	2.35513e-05	0.000205274	15.499	13.747	16.482	26.507	35.521	47.594
Nitab4.5_0000233g0080.1	1.26939	4.14836	1.74298e-06	1.93084e-05	9.741	9.587	11.385	28.521	22.881	23.584
Nitab4.5_0002234g0100.1	1.26919	4.11607	2.05441e-06	2.23877e-05	11.291	7.735	11.165	23.563	25.75	24.044
Nitab4.5_0002916g0060.1	1.26909	4.0523	1.62527e-05	0.000146296	9.132	6.913	11.976	29.189	22.982	18.139
Nitab4.5_0005562g0010.1	1.26897	5.89288	0.00492835	0.0215205	28.015	40.676	41.044	75.862	44.317	143.803
Nitab4.5_0000008g0850.1	1.26846	3.83952	0.000123157	0.000891499	6.376	7.527	10.844	24.827	14.612	20.234
Nitab4.5_0000141g0180.1	1.26834	3.98426	9.86982e-06	9.34074e-05	9.505	7.616	10.143	24.588	20.416	21.949
Nitab4.5_0000437g0130.1	1.26787	3.87653	2.98035e-05	0.000253462	7.759	9.191	7.75	20.5	14.914	24.895
Nitab4.5_0000291g0050.1	1.26642	5.32854	3.30935e-09	6.01708e-08	22.699	26.236	25.444	64.265	65.383	47.292
Nitab4.5_0000043g0150.1	1.2663	3.71862	4.55552e-05	0.000370214	6.906	7.2	8.081	19.451	17.357	17.265
Nitab4.5_0000440g0010.1	1.26554	3.63222	0.000111163	0.000817651	7.22	5.685	7.89	16.221	19.475	14.532
Nitab4.5_0000556g0190.1	1.26542	5.19839	3.08468e-10	6.60114e-09	19.373	25.998	21.679	53.193	59.388	48.188
Nitab4.5_0004850g0010.1	1.26531	8.10029	8.17419e-13	2.49363e-11	151.515	177.612	185.355	471.597	369.417	390.961
Nitab4.5_0004010g0080.1	1.26474	5.11918	0.000370081	0.00236054	18.598	26.979	18.074	71.917	31.173	49.656
Nitab4.5_0002751g0070.1	1.26367	3.44512	0.000315607	0.00203703	6.788	5.388	6.559	15.911	12.035	15.26
Nitab4.5_0000663g0120.1	1.26366	3.44468	0.000315607	0.00203703	5.532	6.804	6.128	14.803	13.895	15.652
Nitab4.5_0001815g0110.1	1.26261	5.87888	5.84245e-11	1.3846e-09	36.52	35.823	36.228	96.064	72.375	92.925
Nitab4.5_0000055g0120.1	1.26248	3.34063	0.000443529	0.00274783	5.837	5.071	5.848	12.586	12.348	14.487
Nitab4.5_0003086g0040.1	1.2616	5.45689	3.74308e-12	1.02503e-10	24.043	28.336	29.028	70.165	61.842	61.734
Nitab4.5_0002076g0140.1	1.26093	4.63617	1.18653e-07	1.63692e-06	14.822	13.628	16.271	40.714	29.223	38.519
Nitab4.5_0000723g0190.1	1.26082	5.8108	9.01712e-10	1.81182e-08	33.205	31.693	39.262	83.693	69.607	95.2
Nitab4.5_0007186g0030.1	1.26027	3.16929	0.00187768	0.00951782	5.356	4.378	5.027	12.777	12.875	9.669
Nitab4.5_0000200g0220.1	1.26026	3.1685	0.00187768	0.00951782	6.425	3.377	4.216	9.261	14.488	11.316
Nitab4.5_0000110g0080.1	1.25943	4.58903	5.08134e-08	7.47784e-07	15.479	16.124	12.667	33.372	39.981	30.564
Nitab4.5_0000101g0370.1	1.25938	3.10813	0.00224309	0.0110519	5.032	3.813	4.756	13.42	8.763	11.529
Nitab4.5_0004227g0030.1	1.25938	3.1075	0.00224309	0.0110519	5.336	4.704	4.386	11.692	11.172	10.319
Nitab4.5_0001542g0060.1	1.25907	8.40408	2.37506e-11	5.90763e-10	203.475	216.912	216.526	521.369	589.904	407.599
Nitab4.5_0002172g0150.1	1.2589	4.49645	2.80226e-07	3.61734e-06	13.017	13.539	13.448	37.723	26.467	33.365
Nitab4.5_0001072g0030.1	1.25869	3.10753	0.00428047	0.0191661	2.089	5.616	5.988	12.67	13.536	7.07
Nitab4.5_0000572g0140.1	1.25867	6.29703	8.51896e-07	1.00826e-05	44.927	46.678	55.503	151.844	87.626	112.14
Nitab4.5_0002728g0030.1	1.2584	3.04353	0.00267881	0.0128089	4.051	4.378	4.456	12.503	8.001	11.506
Nitab4.5_0004942g0020.1	1.25729	2.97565	0.00319785	0.0149733	3.904	5.695	2.794	11.037	7.945	10.857
Nitab4.5_0000131g0110.1	1.25606	2.90494	0.00381533	0.017382	3.845	4.704	3.425	11.049	6.701	10.375
Nitab4.5_0000668g0050.1	1.25605	4.34084	3.18721e-07	4.06978e-06	9.917	13.628	12.366	29.868	29.963	26.531
Nitab4.5_0000142g0320.1	1.25605	2.90406	0.00381533	0.017382	3.737	3.466	4.406	8.236	11.071	8.313
Nitab4.5_0001780g0120.1	1.25537	4.77933	0.000950094	0.00529169	18.912	19.095	12.116	27.437	59.22	32.245
Nitab4.5_0000852g0130.1	1.25462	5.97266	1.05028e-07	1.46812e-06	40.777	37.438	38.291	115.301	94.113	69.128
Nitab4.5_0000044g0390.1	1.25408	9.35598	1.61452e-14	6.09177e-13	362.298	440.637	433.583	1092.64	908.818	935.607
Nitab4.5_0000273g0220.1	1.25315	4.16844	2.108e-06	2.28847e-05	9.437	10.409	12.236	27.544	24.461	23.024
Nitab4.5_0000743g0190.1	1.25306	2.75156	0.00793678	0.0317875	3.659	2.585	3.505	8.677	7.788	7.663
Nitab4.5_0003675g0010.1	1.25123	2.66877	0.00949755	0.0369108	2.59	2.753	3.415	7.997	6.297	8.761
Nitab4.5_0001083g0140.1	1.25122	6.76143	4.47046e-15	1.78401e-13	68.94	63.218	72.065	175.395	153.748	154.245
Nitab4.5_0000459g0060.1	1.25108	5.97021	1.77141e-06	1.95894e-05	39.247	45.49	32.393	96.386	114.485	66.451
Nitab4.5_0000486g0180.1	1.25048	5.17397	2.05923e-10	4.52737e-09	23.994	20.462	22.159	59.474	48.284	50.037
Nitab4.5_0000129g0330.1	1.24983	7.02847	1.88582e-08	2.99715e-07	71.608	93.604	80.967	222.175	150.599	211.004
Nitab4.5_0003890g0030.1	1.24973	4.10392	0.00010118	0.00075445	9.819	12.212	7.79	19.845	32.283	19.865
Nitab4.5_0005893g0010.1	1.24632	7.48471	4.95368e-06	4.99674e-05	76.895	107.827	152.862	250.959	265.006	283.874
Nitab4.5_0000110g0490.1	1.24602	3.82577	2.75898e-05	0.000236368	7.612	7.597	9.272	21.215	15.575	21.254
Nitab4.5_0001863g0010.1	1.24584	5.56643	2.94808e-10	6.33585e-09	28.045	29.534	30.57	81.988	64.52	62.764
Nitab4.5_0001097g0090.1	1.24562	6.55721	7.13937e-08	1.02952e-06	50.135	63.337	63.884	138.173	170.242	110.079
Nitab4.5_0000223g0350.1	1.24495	5.56606	2.63685e-12	7.38207e-11	25.681	29.802	32.263	72.751	64.117	70.899
Nitab4.5_0003077g0020.1	1.24472	5.12466	0.000110773	0.000816203	20.462	21.492	22.159	50.452	69.865	31.898
Nitab4.5_0000391g0280.1	1.24468	6.73103	1.14988e-06	1.3197e-05	63.623	65.764	71.324	199.47	110.484	163.522
Nitab4.5_0002189g0020.1	1.24413	4.43694	1.64851e-07	2.2149e-06	12.889	11.618	14.329	32.633	32.036	27.719
Nitab4.5_0001402g0020.1	1.24321	4.77019	2.78665e-06	2.95179e-05	18.569	14.985	16.021	44.135	28.887	44.737
Nitab4.5_0004743g0160.1	1.24302	8.10071	1.95729e-15	8.0841e-14	155.046	178.057	186.777	417.105	433.668	374.716
Nitab4.5_0000653g0010.1	1.24218	5.68648	3.58485e-05	0.000299703	29.448	33.268	33.294	70.856	104.669	50.978
Nitab4.5_0002529g0010.1	1.24139	4.7699	3.056e-08	4.71507e-07	16.274	16.461	16.632	43.086	31.946	42.53
Nitab4.5_0000240g0140.1	1.24127	6.54207	2.27226e-09	4.26603e-08	51.048	62.862	61.391	115.992	134.643	161.919
Nitab4.5_0002380g0010.1	1.24	4.7079	2.18219e-06	2.35754e-05	15.155	13.549	18.775	46.518	35.241	30.777
Nitab4.5_0000827g0030.1	1.23967	8.30336	0.000123718	0.000894591	206.114	154.753	238.415	430.072	320.405	658.512
Nitab4.5_0000568g0140.1	1.23918	5.43847	0.00715954	0.0293652	25.897	30.495	24.813	82	24.428	83.761
Nitab4.5_0000437g0050.1	1.23861	8.91062	5.54119e-20	3.56501e-18	295.82	325.343	293.338	728.563	676.913	742.698
Nitab4.5_0003234g0110.1	1.23752	8.02049	0.000163326	0.00114751	159.99	143.908	189.33	514.707	224.33	420.585
Nitab4.5_0001668g0040.1	1.23471	3.42732	0.000453195	0.00279735	5.356	8.755	4.426	13.063	13.525	16.84
Nitab4.5_0000202g0370.1	1.23406	4.06337	1.53573e-05	0.000139047	8.887	8.716	12.637	28.736	18.478	22.251
Nitab4.5_0002533g0060.1	1.23398	5.16236	1.00103e-11	2.60619e-10	22.424	22.859	20.667	52.108	53.315	50.216
Nitab4.5_0001364g0100.1	1.2338	8.29637	1.60624e-10	3.59845e-09	183.68	175.908	238.295	433.708	446.621	519.896
Nitab4.5_0000404g0110.1	1.23213	4.1255	0.0102709	0.0394352	10.319	9.983	10.794	29.165	35.095	9.4
Nitab4.5_0008441g0030.1	1.23057	5.27738	0.00505259	0.0220097	11.781	40.756	20.407	56.161	47.432	66.148
Nitab4.5_0001040g0040.1	1.2289	3.26736	0.000760961	0.00437297	5.219	5.091	6.068	14.886	10.611	12.156
Nitab4.5_0000564g0280.1	1.22863	4.99926	1.40146e-10	3.16083e-09	21.424	19.561	18.474	46.459	43.185	48.726
Nitab4.5_0002884g0060.1	1.22641	9.31635	7.87885e-12	2.08095e-10	396.159	480.739	343.474	997.531	985.339	857.572
Nitab4.5_0003553g0140.1	1.22599	5.35569	8.84809e-12	2.32167e-10	25.563	24.701	26.926	64.063	55.791	58.552
Nitab4.5_0000847g0100.1	1.22591	6.62769	1.25548e-12	3.72249e-11	62.868	61.02	64.846	164.37	146.935	127.635
Nitab4.5_0000136g0060.1	1.22551	4.63456	3.09094e-08	4.76166e-07	12.978	15.659	16.382	35.732	35.991	34.811
Nitab4.5_0000463g0190.1	1.22475	5.50489	2.87222e-07	3.69577e-06	28.732	27.87	28.147	76.935	73.496	48.928
Nitab4.5_0001781g0070.1	1.22312	5.49169	1.11463e-09	2.20216e-08	27.476	29.049	27.917	64.015	76.824	56.714
Nitab4.5_0000132g0160.1	1.22304	7.28542	7.12081e-14	2.48585e-12	99.859	98.646	99.922	245.643	201.427	246.184
Nitab4.5_0000175g0060.1	1.22281	3.77241	6.65878e-05	0.000518873	7.897	7.21	8.712	20.643	18.377	16.235
Nitab4.5_0000804g0090.1	1.22226	4.20825	2.14172e-06	2.32257e-05	10.427	11.023	12.166	27.806	24.192	25.847
Nitab4.5_0001002g0050.1	1.22125	3.08684	0.00321544	0.0150346	4.532	3.268	5.667	13.897	7.687	11.473
Nitab4.5_0006642g0020.1	1.22125	3.08652	0.00321544	0.0150346	4.238	3.358	5.507	11.49	8.37	12.369
Nitab4.5_0002466g0030.1	1.22033	6.32577	1.62458e-14	6.11823e-13	47.477	54.057	50.527	119.508	112.288	121.977
Nitab4.5_0003280g0010.1	1.22023	8.76066	0.000164865	0.00115752	198.884	281.388	350.183	621.676	449.344	856.889
Nitab4.5_0003203g0010.1	1.22014	4.77558	5.74137e-09	1.0004e-07	15.881	17.105	17.413	43.11	39.398	35.248
Nitab4.5_0001330g0020.1	1.21998	4.49448	1.18358e-07	1.63397e-06	14.282	12.549	14.619	30.857	32.103	33.074
Nitab4.5_0000312g0050.1	1.21989	6.2984	5.27632e-09	9.26611e-08	47.762	47.728	54.702	139.079	115.258	93.273
Nitab4.5_0000785g0040.1	1.21973	4.14775	4.25001e-06	4.33929e-05	9.917	9.775	11.846	27.556	21.178	25.366
Nitab4.5_0000309g0240.1	1.21927	3.69061	9.37402e-05	0.000705001	7.995	6.943	7.42	21.251	13.973	17.254
Nitab4.5_0000512g0190.1	1.21837	4.11621	5.03278e-06	5.06635e-05	9.907	10.558	10.354	26.948	21.189	24.402
Nitab4.5_0002766g0030.1	1.21814	3.02122	0.00385349	0.017528	4.247	3.843	5.197	12.598	6.465	11.036
Nitab4.5_0000790g0140.1	1.21784	5.46479	2.0127e-09	3.80781e-08	26.279	26.068	31.131	69.2	53.931	69.117
Nitab4.5_0002105g0020.1	1.21458	5.40018	3.61725e-08	5.47167e-07	23.376	26.791	29.599	72.978	60.811	50.53
Nitab4.5_0002728g0140.1	1.2132	3.5578	0.000341538	0.00219032	5.915	6.101	8.421	18.486	10.948	17.31
Nitab4.5_0000057g0080.1	1.213	6.31458	0.00010729	0.000793823	51.901	37.458	62.312	99.854	89.811	160.777
Nitab4.5_0000678g0080.1	1.21275	4.82873	6.4902e-08	9.41313e-07	16.519	17.57	19.025	42.716	34.187	46.272
Nitab4.5_0000568g0170.1	1.21074	2.88005	0.00553323	0.0237225	4.63	2.506	4.756	10.035	7.261	9.154
Nitab4.5_0000093g0060.1	1.21074	2.88012	0.00553323	0.0237225	2.815	4.18	4.015	8.665	6.69	10.868
Nitab4.5_0003366g0020.1	1.21073	2.87968	0.00553323	0.0237225	3.659	3.902	4.416	8.939	9.155	8.504
Nitab4.5_0000473g0120.1	1.21073	2.87958	0.00553323	0.0237225	3.58	3.783	4.216	8.474	9.592	9.535
Nitab4.5_0001467g0050.1	1.21046	4.28519	1.08061e-06	1.24948e-05	11.624	10.954	12.917	31.012	26.68	25.411
Nitab4.5_0000287g0050.1	1.21045	4.28512	1.08061e-06	1.24948e-05	10.143	9.874	14.94	26.221	25.683	30.363
Nitab4.5_0005003g0010.1	1.21017	6.49062	4.28376e-09	7.62305e-08	55.923	55.969	60.31	141.212	104.243	150.547
Nitab4.5_0000938g0070.1	1.21006	4.55751	2.56373e-07	3.33086e-06	11.192	17.867	14.069	29.415	37.583	32.525
Nitab4.5_0001820g0050.1	1.20946	5.79555	3.88397e-13	1.23359e-11	32.567	34.358	39.222	83.025	77.384	82.831
Nitab4.5_0000274g0220.1	1.20688	4.1979	1.51208e-05	0.000137153	14.773	10.469	8.742	31.561	23.61	21.825
Nitab4.5_0004447g0010.1	1.20631	2.80436	0.00662829	0.0274839	3.492	4.13	3.164	10.119	5.804	9.591
Nitab4.5_0000068g0310.1	1.2063	2.8039	0.00958521	0.0371651	3.659	2.625	4.676	8.152	8.236	8.381
Nitab4.5_0000446g0140.1	1.2063	2.80395	0.00958521	0.0371651	3.08	3.556	4.516	8.021	8.213	9.019
Nitab4.5_0000641g0050.1	1.2063	2.80326	0.00958521	0.0371651	4.041	3.704	3.134	6.138	10.029	8.336
Nitab4.5_0004908g0040.1	1.20629	5.50481	1.36903e-11	3.50965e-10	27.976	24.988	32.313	65.803	63.366	68.501
Nitab4.5_0000209g0250.1	1.20536	7.57973	8.44244e-13	2.56377e-11	120.9	126.813	120.84	323.675	247.413	276.424
Nitab4.5_0001210g0080.1	1.20424	4.43676	3.93883e-07	4.92919e-06	13.154	13.103	13.878	34.028	28.574	28.536
Nitab4.5_0003569g0010.1	1.20388	4.43541	0.000746271	0.00431076	14.655	15.609	9.603	34.91	38.311	18.498
Nitab4.5_0000315g0010.1	1.20384	5.31424	3.50183e-10	7.47789e-09	24.749	26.989	24.082	62.048	49.875	60.927
Nitab4.5_0000349g0310.1	1.20345	6.97889	1.25623e-13	4.25232e-12	84.37	85.176	73.357	202.665	168.629	185.717
Nitab4.5_0005992g0010.1	1.2033	6.734	8.87833e-12	2.32656e-10	61.691	65.506	77.132	142.63	171.094	154.85
Nitab4.5_0000956g0060.1	1.2028	7.54605	1.62311e-06	1.80502e-05	102.046	97.893	160.903	275.428	245.542	305.856
Nitab4.5_0000308g0390.1	1.20248	3.79765	8.20013e-05	0.000625384	8.505	7.557	8.601	18.152	23.453	14.655
Nitab4.5_0003332g0030.1	1.20213	3.35758	0.000772059	0.00442914	5.395	7.091	4.876	11.239	13.614	15.618
Nitab4.5_0003120g0030.1	1.19882	3.3041	0.000920272	0.0051589	3.482	3.575	9.232	12.61	12.718	12.817
Nitab4.5_0003668g0110.1	1.19866	4.76135	1.13696e-08	1.88146e-07	16.097	17.639	17.123	37.162	37.336	41.488
Nitab4.5_0000737g0020.1	1.19843	4.74181	1.50483e-07	2.04312e-06	17.706	16.382	15.06	44.254	31.05	38.889
Nitab4.5_0000084g0400.1	1.1979	6.16858	1.48925e-07	2.02531e-06	45.093	44.321	48.965	130.783	81.429	104.354
Nitab4.5_0000754g0030.1	1.19759	6.32423	8.47236e-10	1.71578e-08	47.173	49.6	57.236	134.657	99.133	118.784
Nitab4.5_0004918g0020.1	1.1975	4.74067	4.26012e-08	6.33902e-07	16.283	17.808	15.05	41.441	40.563	32.357
Nitab4.5_0001625g0070.1	1.19723	8.52325	2.28971e-10	5.01118e-09	223.407	243.564	245.935	664.87	485.526	479.137
Nitab4.5_0000316g0220.1	1.1972	4.90987	1.795e-09	3.43951e-08	16.48	18.768	20.918	44.063	40.496	44.2
Nitab4.5_0000931g0030.1	1.19716	4.03949	1.00095e-05	9.45061e-05	14.214	8.062	7.169	24.636	20.349	23.383
Nitab4.5_0000786g0030.1	1.19716	6.67259	2.89512e-05	0.000246767	61.838	60.168	74.819	185.847	96.859	167.723
Nitab4.5_0000824g0070.1	1.19715	4.0389	1.00095e-05	9.45061e-05	10.888	11.063	8.101	23.527	26.31	18.487
Nitab4.5_0002408g0020.1	1.19704	6.46343	6.43706e-06	6.34253e-05	43.818	78.788	47.092	140.509	136.794	111.367
Nitab4.5_0000875g0020.1	1.19616	4.8914	2.31473e-09	4.32622e-08	17.902	19.313	18.434	44.314	38.087	44.838
Nitab4.5_0000187g0190.1	1.19513	3.24717	0.0015559	0.00808687	6.258	3.724	6.088	8.76	11.385	16.111
Nitab4.5_0000993g0080.1	1.19467	4.57182	0.000593386	0.00351981	14.783	13.638	15.961	31.692	47.544	21.657
Nitab4.5_0000595g0010.1	1.19362	8.47936	0.00440766	0.0196349	128.865	281.982	280.721	541.559	723.101	313.822
Nitab4.5_0002655g0040.1	1.19359	4.47785	2.36306e-07	3.0962e-06	13.233	14.104	14.76	32.586	32.316	29.814
Nitab4.5_0000625g0020.1	1.19334	4.24705	1.80969e-06	1.99812e-05	12.35	10.518	11.906	29.093	22.366	28.48
Nitab4.5_0000998g0050.1	1.19277	3.97068	0.000110883	0.000816491	9.525	11.221	7.24	23.504	25.402	15.854
Nitab4.5_0003524g0020.1	1.19236	7.61454	5.38697e-08	7.88139e-07	128.502	136.945	115.583	289.027	224.308	351.591
Nitab4.5_0002700g0220.1	1.1914	5.11861	8.85169e-09	1.49437e-07	22.13	22.889	20.187	42.955	57.293	49.734
Nitab4.5_0000098g0110.1	1.19128	12.0504	3.21595e-16	1.47383e-14	2887.24	2678.03	2694.52	6944.87	6309.33	5518.68
Nitab4.5_0003577g0040.1	1.19104	3.18971	0.0105906	0.0404846	3.384	2.05	9.763	12.24	9.513	12.604
Nitab4.5_0001879g0150.1	1.18884	5.99619	1.66389e-11	4.21175e-10	46.594	40.904	34.606	91.785	87.424	99.861
Nitab4.5_0000249g0470.1	1.18878	3.86369	0.000734406	0.00424467	10.418	7.339	8.431	27.806	14.466	17.635
Nitab4.5_0002543g0150.1	1.18858	5.44495	0.000264861	0.00175059	25.004	22.047	36.268	86.041	44.239	59.975
Nitab4.5_0002031g0100.1	1.18825	9.08203	1.13916e-07	1.57807e-06	319.343	355.996	380.012	1030.94	644.003	721.982
Nitab4.5_0002783g0060.1	1.18732	5.81884	2.03334e-10	4.4873e-09	35.784	34.377	37.92	89.783	69.294	86.416
Nitab4.5_0000125g0100.1	1.18578	3.86293	5.62258e-05	0.000448399	8.063	8.815	9.232	21.74	16.976	20.626
Nitab4.5_0000467g0070.1	1.1851	4.71342	2.23113e-08	3.50984e-07	16.028	16.5	16.972	40.595	34.199	37.253
Nitab4.5_0000353g0060.1	1.18477	7.24871	1.09415e-14	4.19941e-13	95.15	102.38	98.67	246.084	213.237	210.276
Nitab4.5_0000418g0130.1	1.18436	3.82492	0.00227595	0.0111809	6.719	10.122	8.902	17.079	12.796	27.36
Nitab4.5_0000720g0080.1	1.18331	4.09324	1.00514e-05	9.47873e-05	10.378	9.855	10.624	21.489	27.599	21.825
Nitab4.5_0000512g0110.1	1.18323	8.22922	2.16637e-05	0.000190059	149.367	174.809	260.044	464.803	347.925	510.922
Nitab4.5_0000288g0130.1	1.18315	5.76804	1.10454e-12	3.30424e-11	34.882	35.358	34.886	83.597	73.44	80.568
Nitab4.5_0002295g0070.1	1.18274	3.49338	0.000644457	0.00378328	7.691	6.24	5.247	16.686	13.021	14.475
Nitab4.5_0002653g0010.1	1.18251	5.9418	1.0898e-07	1.51388e-06	36.167	42.608	39.562	98.233	68.767	101.732
Nitab4.5_0000472g0340.1	1.18232	4.2956	0.00618829	0.0260688	8.76	7.448	20.617	31.835	19.665	31.427
Nitab4.5_0000714g0060.1	1.18209	3.06443	0.00457968	0.0202752	5.68	3.447	4.666	12.3	9.244	9.445
Nitab4.5_0000131g0370.1	1.18173	4.80881	9.26206e-07	1.08851e-05	17.608	12.984	22.47	45.041	35.129	39.83
Nitab4.5_0001417g0050.1	1.18166	5.88027	7.72573e-06	7.49896e-05	30.546	38.002	44.789	86.434	64.408	106.113
Nitab4.5_0000812g0020.1	1.18157	4.64952	0.000107833	0.00079725	10.025	19.848	17.423	44.635	33.795	27.394
Nitab4.5_0003540g0080.1	1.17981	5.27126	8.00715e-10	1.6268e-08	24.876	25.691	22.96	61.345	48.866	56.737
Nitab4.5_0002469g0070.1	1.17916	5.45051	5.61058e-10	1.15985e-08	32.538	26.325	25.263	70.403	57.517	61.935
Nitab4.5_0000085g0310.1	1.17858	6.17065	3.26422e-11	7.95178e-10	44.662	43.202	51.248	111.594	111.381	92.231
Nitab4.5_0000222g0080.1	1.17827	6.29039	7.76009e-09	1.32908e-07	47.526	54.017	49.816	117.351	133.007	92.175
Nitab4.5_0001223g0040.1	1.17794	7.01345	9.10132e-10	1.82691e-08	70.941	82.611	98.65	195.442	169.335	202.466
Nitab4.5_0001556g0100.1	1.17754	6.09365	4.4249e-07	5.48956e-06	40.238	50.729	40.974	123.894	78.392	96.959
Nitab4.5_0003496g0010.1	1.17677	5.50881	2.63307e-10	5.71391e-09	27.682	30.832	29.138	73.514	59.265	63.795
Nitab4.5_0001800g0100.1	1.17672	2.99803	0.00550621	0.023642	4.453	4.011	4.676	10.035	6.443	13.12
Nitab4.5_0000659g0040.1	1.17672	2.99761	0.00550621	0.023642	4.189	4.516	4.256	10.739	9.984	8.851
Nitab4.5_0000703g0220.1	1.17672	2.99802	0.00550621	0.023642	3.237	3.724	6.308	11.18	9.737	9.658
Nitab4.5_0000915g0190.1	1.17672	2.99797	0.00550621	0.023642	3.374	2.387	7.119	8.951	8.415	12.358
Nitab4.5_0001223g0020.1	1.17641	3.74495	0.0101221	0.0389234	7.681	5.2	10.824	13.003	13.917	27.315
Nitab4.5_0001198g0150.1	1.17602	3.70467	0.000762337	0.00437837	6.965	8.28	7.9	22.312	11.239	19.181
Nitab4.5_0006875g0010.1	1.17598	6.51552	8.76853e-09	1.48157e-07	44.887	68.953	64.685	144.049	126.015	130.716
Nitab4.5_0000714g0070.1	1.17553	7.46908	3.205e-08	4.911e-07	99.319	142.868	104.188	266.823	223.176	288.546
Nitab4.5_0000003g0420.1	1.17502	3.393	0.000920599	0.0051589	6.896	7.507	3.615	16.924	11.922	12.481
Nitab4.5_0000227g0190.1	1.17502	3.39339	0.000920599	0.0051589	5.984	6.576	5.758	17.282	11.373	12.772
Nitab4.5_0000549g0050.1	1.17359	6.25274	2.55159e-14	9.38059e-13	48.939	49.254	50.236	107.792	110.294	114.773
Nitab4.5_0000101g0090.1	1.17329	7.4892	1.5487e-08	2.49696e-07	108.579	109.867	132.405	301.339	210.055	279.068
Nitab4.5_0000238g0040.1	1.17193	5.97946	1.57197e-05	0.00014188	30.124	35.318	56.314	102.584	94.438	77.778
Nitab4.5_0005440g0060.1	1.17072	2.92837	0.0066221	0.0274696	3.826	4.15	4.556	11.978	7.306	8.974
Nitab4.5_0001417g0020.1	1.17072	2.92833	0.0066221	0.0274696	3.306	3.318	4.927	10.798	7.978	9.792
Nitab4.5_0004506g0010.1	1.17067	3.34062	0.00110029	0.00600819	5.748	6.121	5.517	16.615	9.166	14.016
Nitab4.5_0000628g0030.1	1.17061	3.92409	5.57869e-05	0.00044543	9.456	8.547	9.763	21.215	16.864	23.215
Nitab4.5_0000446g0200.1	1.17057	4.66324	6.13956e-08	8.93039e-07	15.097	15.044	17.483	39.761	34.266	33.623
Nitab4.5_0001727g0090.1	1.1704	3.81287	0.00951303	0.0369638	10.516	7.686	6.168	29.189	9.155	18.968
Nitab4.5_0000611g0180.1	1.17025	4.78225	1.02796e-06	1.19688e-05	17.559	15.579	19.165	44.314	30.49	42.844
Nitab4.5_0002786g0110.1	1.16843	4.31224	2.15533e-06	2.33229e-05	12.517	13.262	11.515	29.558	26.075	27.058
Nitab4.5_0004290g0030.1	1.16838	9.0979	1.39854e-11	3.58074e-10	355.765	361.107	360.566	909.118	661.091	841.281
Nitab4.5_0001601g0030.1	1.16794	4.31107	0.000235379	0.00157966	13.89	14.321	8.361	29.403	34.389	19.304
Nitab4.5_0001056g0040.1	1.16775	8.38768	2.32516e-14	8.5954e-13	197.344	228.648	231.806	519.021	506.917	446.455
Nitab4.5_0000914g0160.1	1.1672	4.619	2.41726e-06	2.59336e-05	12.752	15.876	17.753	32.824	30.041	41.836
Nitab4.5_0003658g0050.1	1.16598	3.92182	0.00679338	0.0280526	10.486	8.27	8.681	18.843	31.285	11.294
Nitab4.5_0000303g0260.1	1.16566	5.30246	8.65224e-08	1.2248e-06	19.128	29.891	26.855	52.382	64.856	52.827
Nitab4.5_0000244g0100.1	1.16461	4.61849	0.00075475	0.00435185	14.439	9.32	22.149	27.627	33.381	42.788
Nitab4.5_0000944g0090.1	1.1633	7.91513	2.03441e-12	5.80892e-11	171.026	132.389	171.767	365.95	339.118	354.459
Nitab4.5_0000101g0300.1	1.16273	4.05048	1.68035e-05	0.000150713	9.819	10.36	10.163	24.803	21.357	21.254
Nitab4.5_0000855g0030.1	1.16216	6.7051	0.0001189	0.000866306	71.275	61.594	71.535	205.179	157.009	94.561
Nitab4.5_0001180g0170.1	1.1617	5.03817	1.28031e-09	2.49511e-08	19.158	20.036	23.291	51.095	44.328	44.715
Nitab4.5_0003668g0090.1	1.16128	4.01798	0.000126096	0.00090982	9.682	9.548	11.035	26.912	15.665	23.876
Nitab4.5_0006569g0040.1	1.16093	5.83848	1.14005e-07	1.57822e-06	33.577	37.329	39.903	97.316	64.419	86.36
Nitab4.5_0001311g0010.1	1.16087	5.20252	7.8238e-07	9.30926e-06	23.66	24.265	22.81	65.433	49.998	42.396
Nitab4.5_0000295g0170.1	1.16066	5.02134	2.18941e-07	2.88474e-06	20.678	16.728	24.903	47.162	39.947	51.684
Nitab4.5_0000745g0170.1	1.15989	9.86097	7.8326e-10	1.59456e-08	506.73	615.496	713.923	1457.7	1227.8	1399.2
Nitab4.5_0000005g0230.1	1.15956	4.65577	7.13582e-07	8.56682e-06	19.57	14.737	13.778	41.656	31.319	33.489
Nitab4.5_0002362g0040.1	1.15951	6.81629	2.1464e-06	2.32639e-05	62.113	74.529	84.562	200.936	123.539	168.082
Nitab4.5_0000250g0140.1	1.15888	3.52528	0.000758087	0.00436269	7.318	7.398	5.848	17.795	12.572	14.935
Nitab4.5_0000059g0170.1	1.15586	4.96897	1.79746e-09	3.43951e-08	19.923	20.205	19.666	47.091	41.056	46.227
Nitab4.5_0000113g0090.1	1.15541	6.79819	7.23433e-15	2.82519e-13	76.523	74.38	68.03	168.232	156.964	160.552
Nitab4.5_0000563g0140.1	1.15521	5.79767	1.43346e-11	3.66547e-10	31.488	37.438	38.921	84.539	74.605	81.598
Nitab4.5_0000325g0010.1	1.15519	5.09454	7.68433e-05	0.000589857	23.846	21.799	20.397	63.646	32.72	49.051
Nitab4.5_0003725g0010.1	1.15473	4.73341	4.35341e-08	6.46347e-07	18.304	16.738	16.211	39.784	34.546	38.082
Nitab4.5_0000417g0040.1	1.15432	6.0317	1.61616e-07	2.17872e-06	39.1	39.676	49.535	117.041	82.785	83.929
Nitab4.5_0001588g0010.1	1.15373	6.031	1.915e-09	3.64704e-08	38.256	46.946	42.817	101.773	80.062	102.74
Nitab4.5_0000559g0450.1	1.15303	5.29335	3.84872e-08	5.76962e-07	30.399	22.225	23.201	62.597	58.918	47.852
Nitab4.5_0004783g0020.1	1.15181	7.85945	0.000327358	0.00210476	95.268	152.267	211.86	407.379	298.678	311.582
Nitab4.5_0006512g0050.1	1.14961	4.67026	4.21394e-07	5.25708e-06	16.421	17.857	13.638	39.927	30.064	37.813
Nitab4.5_0000421g0100.1	1.14959	4.80625	8.61513e-05	0.000653558	17.804	17.828	17.443	43.42	49.606	25.982
Nitab4.5_0000192g0040.1	1.14877	3.10656	0.00537623	0.0232179	4.748	4.13	4.977	10.488	11.015	10.565
Nitab4.5_0000022g0320.1	1.14877	3.10643	0.00537623	0.0232179	4.708	4.031	5.057	10.476	11.485	9.781
Nitab4.5_0001714g0230.1	1.1487	5.89247	3.81972e-11	9.26005e-10	37.756	44.688	34.065	80.296	88.242	88.847
Nitab4.5_0002155g0050.1	1.14853	5.91164	0.000390926	0.00246763	28.398	39.587	49.846	97.578	58.032	106.068
Nitab4.5_0000343g0360.1	1.14754	10.6293	0.00668715	0.0276937	899.682	990.706	1254.91	3120.47	1014.2	2808.99
Nitab4.5_0002518g0050.1	1.14703	5.91173	8.30471e-05	0.000632399	23.415	46.837	48.084	77.09	89.273	93.463
Nitab4.5_0000944g0030.1	1.14514	4.2159	1.15527e-05	0.000107013	11.771	10.191	13.107	22.586	28.316	25.601
Nitab4.5_0000136g0340.1	1.14487	4.70654	3.79273e-05	0.000314814	17.922	17.263	14.249	47.567	28.282	34.732
Nitab4.5_0001496g0020.1	1.14241	8.50767	0.000103889	0.000772073	204.77	262.996	256.459	601.51	332.406	657.402
Nitab4.5_0004194g0090.1	1.14198	9.22897	4.33742e-06	4.42179e-05	336.813	409.835	448.242	770.707	710.159	1141.03
Nitab4.5_0000381g0210.1	1.14183	3.04189	0.00647926	0.0270279	4.738	4.368	4.436	9.797	10.096	10.733
Nitab4.5_0002579g0090.1	1.14182	3.04136	0.00647926	0.0270279	4.306	4.992	4.105	7.747	12.965	9.366
Nitab4.5_0004657g0010.1	1.1418	4.46893	7.7077e-07	9.182e-06	15.185	13.41	12.797	33.837	29.649	28.525
Nitab4.5_0000726g0030.1	1.14112	4.66416	0.000600403	0.00356038	11.909	21.116	16.151	43.753	23.363	38.799
Nitab4.5_0001803g0130.1	1.14097	5.90553	1.43021e-12	4.20332e-11	35.029	41.984	40.524	86.792	84.174	88.623
Nitab4.5_0000469g0120.1	1.14082	4.00576	3.93103e-05	0.00032499	8.976	10.172	11.075	23.384	17.738	24.201
Nitab4.5_0002543g0130.1	1.14072	7.99982	1.97042e-06	2.15543e-05	159.892	158.685	190.392	349.586	289.321	477.77
Nitab4.5_0000024g0030.1	1.14064	4.32109	3.54404e-06	3.66132e-05	12.379	12.152	13.157	28.569	25.246	28.245
Nitab4.5_0001984g0010.1	1.14008	7.65839	0.000389444	0.00245982	94.189	148.592	158.64	340.933	191.801	349.249
Nitab4.5_0001478g0040.1	1.1396	4.76211	4.21317e-05	0.000345187	15.626	18.105	18.134	49.152	27.935	37.186
Nitab4.5_0001279g0170.1	1.13956	4.31965	3.60106e-05	0.000300683	12.065	13.787	11.295	26.459	34.781	21.915
Nitab4.5_0001676g0020.1	1.13891	7.66287	1.82245e-10	4.03775e-09	130.425	158.625	114.842	323.257	283.057	279.583
Nitab4.5_0000057g0140.1	1.13859	4.29399	2.91857e-05	0.000248555	11.428	11.509	13.558	28.486	20.595	31.774
Nitab4.5_0005274g0020.1	1.13848	3.32152	0.00155962	0.00810412	4.463	7.755	4.736	13.897	12.382	11.999
Nitab4.5_0004891g0020.1	1.13838	9.29026	5.09848e-11	1.21546e-09	410.55	405.774	432.832	972.8	1018.55	746.182
Nitab4.5_0000118g0080.1	1.13628	7.70015	8.31705e-06	8.02635e-05	97.544	137.262	178.846	285.022	291.439	330.505
Nitab4.5_0002739g0020.1	1.13627	3.55535	0.000884517	0.00498454	8.063	6.824	6.328	15.387	17.85	12.817
Nitab4.5_0002456g0110.1	1.13622	5.25685	1.08523e-06	1.25338e-05	20.158	25.563	29.068	63.634	43.768	55.135
Nitab4.5_0001560g0040.1	1.13597	4.12503	1.95221e-05	0.000172781	10.702	10.726	10.564	24.91	23.542	22.273
Nitab4.5_0000938g0060.1	1.13593	5.84056	1.18294e-08	1.94632e-07	32.184	38.458	42.296	92.787	69.607	84.926
Nitab4.5_0004430g0080.1	1.13557	5.11455	1.73325e-05	0.000154959	17.716	19.165	30.63	49.379	41.415	55.93
Nitab4.5_0006444g0020.1	1.13475	8.18154	2.49914e-08	3.89784e-07	175.911	194.261	209.647	468.784	471.43	327.514
Nitab4.5_0000716g0250.1	1.13377	5.22694	5.72224e-06	5.68345e-05	23.739	25.365	24.172	68.389	49.841	42.004
Nitab4.5_0001764g0030.1	1.13354	3.93571	9.11118e-05	0.000687035	9.132	9.468	9.593	24.576	17.94	20.324
Nitab4.5_0001137g0020.1	1.13354	3.93586	9.11118e-05	0.000687035	8.387	9.132	10.113	22.61	16.236	23.797
Nitab4.5_0002728g0100.1	1.13349	6.46743	5.76426e-05	0.000457698	61.279	59.257	54.893	126.063	86.505	170.502
Nitab4.5_0000377g0120.1	1.13279	5.93522	3.83647e-05	0.000317958	30.046	42.489	47.803	101.392	63.938	99.581
Nitab4.5_0003907g0020.1	1.1322	6.02444	8.29174e-11	1.9376e-09	42.965	44.103	40.964	103.442	82.37	95.48
Nitab4.5_0000071g0200.1	1.13207	5.41947	4.76432e-08	7.04747e-07	30.87	26.642	26.155	61.202	51.746	70.002
Nitab4.5_0000396g0250.1	1.13104	3.50885	0.00106056	0.0058261	6.366	6.329	7.3	15.375	13.278	15.551
Nitab4.5_0000981g0060.1	1.131	6.06235	1.67558e-10	3.72882e-09	48.311	43.618	40.554	90.51	90.931	107.121
Nitab4.5_0002823g0100.1	1.12806	5.30555	0.000103519	0.000770175	24.337	20.304	32.293	39.749	64.296	64.243
Nitab4.5_0001393g0060.1	1.12776	4.67657	1.64411e-07	2.21194e-06	15.185	16.164	17.984	37.663	35.947	33.679
Nitab4.5_0000718g0220.1	1.12724	5.18097	1.48828e-09	2.88361e-08	26.26	22.086	22.43	54.397	47.298	52.927
Nitab4.5_0004608g0040.1	1.12542	3.86189	0.000129916	0.00093503	7.779	8.528	10.394	20.476	18.455	19.114
Nitab4.5_0000254g0220.1	1.12541	3.20851	0.00317103	0.0148616	5.385	5.19	5.688	13.063	9.715	13.243
Nitab4.5_0000578g0150.1	1.1254	2.90371	0.00942714	0.0367011	3.669	4.189	4.496	9.475	8.807	8.526
Nitab4.5_0005086g0010.1	1.1254	2.90367	0.00942714	0.0367011	3.816	3.308	4.786	8.856	8.796	9.299
Nitab4.5_0002265g0230.1	1.12533	4.17557	2.46765e-05	0.000213874	10.31	14.351	9.162	24.016	29.291	20.974
Nitab4.5_0008797g0010.1	1.12477	6.22716	0.000380311	0.002412	54.118	32.892	62.192	124.967	76.667	122.65
Nitab4.5_0002812g0010.1	1.12424	6.26874	1.70464e-08	2.733e-07	42.661	49.224	61.451	119.139	116.49	98.012
Nitab4.5_0002776g0080.1	1.12417	7.35826	8.95715e-09	1.50836e-07	102.066	97.041	129.741	267.574	238.337	207.284
Nitab4.5_0000113g0030.1	1.12332	9.46252	6.03036e-15	2.36884e-13	507.162	439.518	471.473	1032.23	943.868	1096.87
Nitab4.5_0000152g0120.1	1.12269	7.27909	2.55328e-08	3.9792e-07	95.033	97.031	118.647	242.556	183.868	247.865
Nitab4.5_0000249g0070.1	1.1223	4.28352	5.86667e-06	5.81827e-05	10.123	12.697	13.888	25.089	25.335	29.354
Nitab4.5_0000934g0200.1	1.12155	3.99402	5.48687e-05	0.000438622	9.613	10.647	9.272	24.314	17.828	22.374
Nitab4.5_0000618g0070.1	1.11985	3.41027	0.00253868	0.0122556	6.101	4.853	8.141	18.974	11.99	10.599
Nitab4.5_0001913g0180.1	1.11981	5.47122	5.57158e-07	6.8194e-06	27.76	29.386	30.24	78.246	52.374	58.541
Nitab4.5_0001815g0070.1	1.11967	4.84104	0.00580329	0.0247324	19.256	13.192	23.151	43.336	22.287	55.706
Nitab4.5_0001404g0050.1	1.11803	7.51776	1.16278e-08	1.91472e-07	127.649	99.25	141.096	297.346	241.855	256.223
Nitab4.5_0000187g0270.1	1.11747	3.95889	6.54385e-05	0.000512104	9.378	11.469	8.051	22.514	17.895	22.139
Nitab4.5_0000819g0070.1	1.11746	3.95886	6.54385e-05	0.000512104	8.475	9.775	10.484	22.681	19.677	20.705
Nitab4.5_0003384g0010.1	1.11734	8.00689	0.00906957	0.0355851	190.036	149.246	178.956	564.455	394.349	162.648
Nitab4.5_0000007g0170.1	1.11632	3.78301	0.000258235	0.00171413	9.162	8.894	7.139	14.743	22.982	17.422
Nitab4.5_0000003g0100.1	1.11585	5.61259	5.4143e-10	1.12158e-08	27.868	30.951	37.76	73.276	66.201	70.125
Nitab4.5_0000611g0080.1	1.1156	2.82969	0.0113818	0.0429126	4.198	3.754	3.865	10.548	5.323	9.445
Nitab4.5_0000319g0260.1	1.11486	5.87107	5.795e-09	1.00805e-07	34.911	39.676	41.685	96.219	83.11	71.716
Nitab4.5_0000011g0010.1	1.11285	6.00254	0.000674199	0.00394439	34.794	65.784	27.637	96.124	93.71	85.856
Nitab4.5_0000067g0260.1	1.11198	5.46678	6.69391e-07	8.08464e-06	23.238	30.445	34.305	73.288	53.136	62.059
Nitab4.5_0000183g0090.1	1.11147	7.57577	1.27088e-11	3.26638e-10	136.556	129.269	119.037	304.164	241.094	282.642
Nitab4.5_0000529g0020.1	1.11138	3.74457	0.000308869	0.00200148	8.201	9.627	7.31	20.262	13.984	19.517
Nitab4.5_0000100g0120.1	1.11138	3.74429	0.000308869	0.00200148	8.524	7.21	8.451	19.439	15.968	17.377
Nitab4.5_0000868g0010.1	1.11076	4.45015	0.000977354	0.00542201	12.497	15.797	13.498	29.081	41.673	19.921
Nitab4.5_0001270g0090.1	1.11019	5.82403	0.000494397	0.00300637	28.133	38.933	45.7	77.888	56.441	109.339
Nitab4.5_0000204g0050.1	1.10961	3.08526	0.00753554	0.0305701	4.601	4.496	5.557	10.834	10.589	10.588
Nitab4.5_0001151g0090.1	1.10906	4.4937	6.49647e-05	0.000508992	16.352	15.005	11.856	35.994	23.038	34.721
Nitab4.5_0007282g0030.1	1.10897	3.53955	0.00122947	0.00660398	9.113	6.21	4.957	14.088	15.015	15.73
Nitab4.5_0000188g0360.1	1.10897	3.54058	0.00122947	0.00660398	5.297	7.299	8.391	18.331	14.04	13.131
Nitab4.5_0003441g0020.1	1.10861	10.1773	6.48674e-09	1.11959e-07	837.706	781.242	726.169	2045.81	1614.66	1374.88
Nitab4.5_0000233g0210.1	1.1066	6.51969	1.50422e-06	1.68683e-05	49.429	72.736	62.152	133.703	107.268	155.197
Nitab4.5_0002467g0010.1	1.10643	7.84079	0.000393104	0.00247904	137.223	175.968	150.769	383.161	197.068	413.235
Nitab4.5_0000643g0120.1	1.10523	5.89053	1.5519e-07	2.09772e-06	37.393	40.201	40.654	94.98	65.865	93.396
Nitab4.5_0003867g0060.1	1.10458	5.32682	0.000100808	0.000751961	25.897	27.652	25.884	63.526	37.112	70.025
Nitab4.5_0000907g0090.1	1.10452	9.27113	2.07373e-06	2.25492e-05	405.311	493.238	354.298	1021.13	996.141	667.027
Nitab4.5_0000220g0150.1	1.10335	4.44515	0.00105632	0.00581077	11.016	12.578	18.845	39.665	21.122	29.242
Nitab4.5_0002424g0020.1	1.10277	7.08285	3.36457e-08	5.12809e-07	96.102	96.675	80.897	230.542	159.877	196.114
Nitab4.5_0000678g0110.1	1.10166	4.34744	6.66212e-06	6.52972e-05	12.674	14.817	11.816	28.974	26.467	28.223
Nitab4.5_0000170g0440.1	1.10093	7.34662	3.19309e-07	4.07469e-06	85.233	107.55	136.16	251.293	219.221	233.557
Nitab4.5_0000312g0130.1	1.10046	5.97089	8.38607e-11	1.95737e-09	44.809	43.707	37.47	94.777	81.104	92.982
Nitab4.5_0001949g0030.1	1.09993	3.81159	0.002099	0.0104575	4.463	10.647	11.215	22.92	13.637	19.573
Nitab4.5_0001046g0030.1	1.09964	5.14856	4.98794e-08	7.34578e-07	21.257	22.898	25.774	47.031	57.046	46.272
Nitab4.5_0001135g0020.1	1.0995	5.25923	1.10541e-09	2.18611e-08	27.78	24.751	23.571	58.151	51.881	53.219
Nitab4.5_0002113g0180.1	1.09929	3.94729	0.00173502	0.00887086	8.779	11.915	8.742	28.974	19.822	13.456
Nitab4.5_0000712g0150.1	1.09921	5.07543	5.52573e-09	9.67026e-08	21.237	22.354	23.381	51.346	43.97	46.653
Nitab4.5_0000102g0460.1	1.09842	4.99726	1.72199e-07	2.30437e-06	23.356	18.214	22.089	52.418	39.6	42.541
Nitab4.5_0000044g0430.1	1.09781	5.60016	2.49675e-11	6.1797e-10	33.518	31.089	32.653	71.083	68.229	67.414
Nitab4.5_0000892g0140.1	1.09776	3.24676	0.0026399	0.012656	6.768	5.774	4.336	13.635	10.085	11.988
Nitab4.5_0000338g0140.1	1.09776	3.247	0.0026399	0.012656	5.395	5.774	5.868	12.455	9.446	13.445
Nitab4.5_0000978g0150.1	1.09753	5.34867	2.19739e-08	3.45946e-07	25.985	26.682	28.177	66.113	50.368	56.871
Nitab4.5_0000205g0080.1	1.09662	6.07127	1.42387e-08	2.31428e-07	43.563	42.41	49.235	102.739	79.726	105.586
Nitab4.5_0002312g0110.1	1.09615	6.98275	0.00843836	0.0334882	49.792	69.567	136.08	179.721	231.479	134.134
Nitab4.5_0000355g0240.1	1.09587	7.15676	8.6507e-09	1.46784e-07	94.827	90.802	104.088	211.389	170.31	234.095
Nitab4.5_0002533g0050.1	1.09587	3.44275	0.00177329	0.00904811	5.993	8.082	5.838	13.349	14.769	13.624
Nitab4.5_0002629g0010.1	1.09581	5.70089	1.19082e-07	1.64171e-06	30.733	35.239	37.449	86.958	61.002	74.293
Nitab4.5_0000697g0180.1	1.09529	8.1306	1.2242e-09	2.39041e-08	174.655	208.295	187.027	477.759	363.624	372.161
Nitab4.5_0000383g0170.1	1.09482	7.95368	1.15265e-05	0.00010682	161.167	166.182	176.924	427.498	244.041	401.527
Nitab4.5_0000007g0150.1	1.09451	4.29173	9.46026e-06	8.9998e-05	14.518	13.598	9.503	25.542	27.263	28.032
Nitab4.5_0001302g0010.1	1.09446	3.616	0.000529067	0.00318058	7.112	7.478	7.92	15.613	15.519	17.635
Nitab4.5_0000257g0140.1	1.09364	6.43649	2.58756e-08	4.02949e-07	50.822	61.901	62.242	147.314	111.224	114.403
Nitab4.5_0001911g0090.1	1.09314	6.4928	1.32842e-07	1.81768e-06	66.488	56.087	59.729	139.138	101.475	146.536
Nitab4.5_0001757g0010.1	1.09121	4.15578	3.64182e-05	0.000303581	11.124	11.855	11.455	26.34	22.119	24.671
Nitab4.5_0003856g0050.1	1.09072	4.26433	1.12745e-05	0.000104726	12.85	12.974	10.774	30.416	24.697	23.181
Nitab4.5_0000439g0110.1	1.0907	5.61641	8.01954e-08	1.14411e-06	33.46	33.971	31.201	82.31	58.021	69.733
Nitab4.5_0003003g0030.1	1.09015	2.951	0.0110063	0.0417713	4.11	4.229	4.366	9.535	8.662	9.344
Nitab4.5_0001864g0030.1	1.09008	4.992	4.15529e-06	4.2469e-05	20.335	19.937	22.159	53.467	34.512	46.295
Nitab4.5_0001110g0140.1	1.08937	8.40822	9.42767e-11	2.16772e-09	236.621	259.47	197.241	536.16	484.686	446.981
Nitab4.5_0001408g0050.1	1.0892	3.18864	0.00446341	0.0198349	4.993	5.527	5.297	15.172	9.446	9.232
Nitab4.5_0003799g0010.1	1.08919	3.18771	0.00446341	0.0198349	5.64	4.804	4.937	11.907	12.852	9.512
Nitab4.5_0003281g0080.1	1.08916	6.5732	3.56553e-13	1.13785e-11	62.691	67.507	63.193	136.611	132.794	139.433
Nitab4.5_0000123g0440.1	1.08915	5.48595	3.85575e-09	6.91658e-08	29.094	26.781	34.365	65.576	58.032	66.832
Nitab4.5_0000652g0020.1	1.08898	6.35494	0.00125175	0.00671909	46.212	49.996	69.392	137.625	69.249	143.59
Nitab4.5_0002192g0100.1	1.08853	3.39272	0.00213093	0.0106034	4.62	6.131	8.922	17.27	11.833	10.913
Nitab4.5_0000556g0260.1	1.08776	6.58266	2.19524e-13	7.16505e-12	67.812	64.872	61.892	141.927	136.346	133.719
Nitab4.5_0000535g0130.1	1.08765	3.73011	0.000429095	0.00267243	5.336	9.478	9.803	15.089	16.617	19.54
Nitab4.5_0000108g0290.1	1.08741	5.67536	0.000165363	0.00116061	28.369	39.112	35.387	69.76	51.567	96.242
Nitab4.5_0000297g0040.1	1.08737	3.87393	0.000208973	0.00142193	10.3	9.696	7.84	24.183	18.287	15.988
Nitab4.5_0000051g0060.1	1.08736	3.87384	0.000208973	0.00142193	7.592	8.934	10.544	20.154	18.836	20.201
Nitab4.5_0001651g0030.1	1.08731	5.64514	4.50853e-09	7.98057e-08	31.566	34.932	34.235	80.189	71.613	61.622
Nitab4.5_0000556g0230.1	1.08712	4.00483	8.85085e-05	0.000670174	9.397	11.34	9.523	23.992	18.814	21.478
Nitab4.5_0000175g0360.1	1.08706	7.21634	3.10386e-06	3.26028e-05	109.766	93.575	100.343	256.906	155.418	228.919
Nitab4.5_0002982g0050.1	1.08649	6.73296	7.82637e-06	7.59298e-05	61.612	91.168	63.714	170.258	120.099	167.353
Nitab4.5_0000410g0400.1	1.0853	7.01056	3.82482e-09	6.86722e-08	83.664	85.344	93.534	199.161	153.502	202.186
Nitab4.5_0000145g0180.1	1.08483	6.28723	1.67286e-10	3.72688e-09	53.716	54.394	50.737	101.475	123.606	108.779
Nitab4.5_0000194g0220.1	1.08345	4.74602	5.09422e-07	6.27339e-06	17.264	17.283	18.154	37.579	32.585	41.522
Nitab4.5_0000495g0080.1	1.08309	7.19741	1.13887e-10	2.59483e-09	97.181	99.468	103.156	240.161	186.008	206.634
Nitab4.5_0005564g0020.1	1.08279	4.49971	4.31461e-06	4.40129e-05	13.772	14.52	16.101	30.142	36.283	27.282
Nitab4.5_0001170g0230.1	1.08213	5.12342	3.29239e-08	5.03721e-07	25.082	22.304	21.478	54.993	43.118	48.323
Nitab4.5_0000218g0110.1	1.08157	3.68772	0.000513955	0.00310554	8.877	6.656	8.782	15.768	18.41	16.537
Nitab4.5_0000503g0080.1	1.08145	5.83071	6.48744e-12	1.73399e-10	38.766	38.488	38	81.81	83.356	77.117
Nitab4.5_0000315g0120.1	1.08091	10.4788	3.97728e-08	5.94902e-07	963.933	1037.35	926.704	2283.4	2309.73	1573.63
Nitab4.5_0000057g0120.1	1.08057	3.33968	0.00256179	0.0123494	5.964	5.437	6.358	16.305	10.197	11.91
Nitab4.5_0000786g0160.1	1.08007	10.3614	2.40711e-05	0.000209259	825.798	829.723	1041.86	1900.79	1362.43	2411.17
Nitab4.5_0002381g0030.1	1.07977	3.1269	0.00867309	0.0343179	4.434	6.566	4.406	10.179	10.219	11.955
Nitab4.5_0001361g0140.1	1.07927	4.38324	1.25522e-05	0.000115684	10.545	13.905	16.031	33.444	27.442	24.727
Nitab4.5_0001494g0020.1	1.07922	4.38261	8.85764e-06	8.49496e-05	13.321	13.272	14.83	30.44	29.246	25.623
Nitab4.5_0001454g0190.1	1.07878	6.60802	1.28411e-10	2.91254e-09	69.283	66.299	63.304	136.027	156.561	125.831
Nitab4.5_0002315g0120.1	1.07862	2.87914	0.0133188	0.0487999	3.59	4.665	4.436	9.44	6.779	10.7
Nitab4.5_0000252g0020.1	1.07658	4.54079	2.25382e-06	2.43101e-05	14.547	13.42	17.633	34.528	29.201	33.052
Nitab4.5_0001030g0070.1	1.07655	6.62809	7.54406e-08	1.08243e-06	64.84	63.01	73.597	161.724	114.967	148.217
Nitab4.5_0001208g0120.1	1.07602	4.45106	3.30699e-06	3.45555e-05	15.185	11.835	15.911	31.251	30.041	28.996
Nitab4.5_0000093g0220.1	1.07539	5.18891	1.15179e-08	1.90131e-07	25.543	24.929	22.98	50.511	56.329	47.124
Nitab4.5_0000893g0110.1	1.07535	5.3836	3.02047e-08	4.67102e-07	23.003	30.951	29.629	65.183	54.066	57.633
Nitab4.5_0000021g0060.1	1.07511	5.63622	4.3138e-05	0.000352569	34.421	39.013	27.016	55.851	64.744	90.315
Nitab4.5_0000171g0260.1	1.07509	3.64546	0.000615751	0.00364386	9.525	6.358	7.6	18.069	14.007	17.321
Nitab4.5_0004784g0010.1	1.07377	6.0633	2.6229e-05	0.000225964	37.893	53.225	44.058	111.32	68.801	106.146
Nitab4.5_0000039g0080.1	1.07372	3.47596	0.00204433	0.0102181	6.553	6.458	6.969	14.195	12.83	15.484
Nitab4.5_0002135g0040.1	1.07372	3.47556	0.00204433	0.0102181	7.485	7.468	5.607	14.493	14.04	14.274
Nitab4.5_0002093g0140.1	1.0729	5.11705	5.09506e-08	7.49254e-07	22.032	25.474	21.528	52.084	51.544	41.992
Nitab4.5_0000869g0070.1	1.07278	4.02656	0.000102119	0.000760891	11.859	11.806	8.141	23.42	21.234	20.671
Nitab4.5_0002087g0040.1	1.07268	7.80157	5.56873e-08	8.12953e-07	157.293	165.707	135.819	335.903	257.879	365.036
Nitab4.5_0001357g0020.1	1.07248	8.62265	2.76308e-11	6.79697e-10	243.418	309.387	257.991	612.618	536.454	548.825
Nitab4.5_0000804g0140.1	1.07215	4.66217	1.09345e-05	0.000101992	14.106	16.817	18.524	40.941	28.125	36.816
Nitab4.5_0001317g0160.1	1.07196	3.28472	0.0126434	0.0468768	4.414	4.13	8.972	11.144	8.606	17.758
Nitab4.5_0002227g0060.1	1.07184	4.42493	7.91967e-05	0.000605375	13.625	15.599	12.667	31.501	34.759	21.579
Nitab4.5_0004345g0020.1	1.07165	5.60377	3.82066e-08	5.73184e-07	34.382	34.952	29.309	71.321	58.268	76.702
Nitab4.5_0000482g0210.1	1.0716	5.25553	0.000526531	0.00316723	21.62	20.155	34.966	70.439	48.665	42.429
Nitab4.5_0006893g0030.1	1.07128	6.38601	8.58795e-08	1.21741e-06	49.959	57.583	62.993	140.795	103.022	114.672
Nitab4.5_0001223g0170.1	1.0691	7.87635	2.61425e-06	2.78979e-05	175.969	155.06	152.832	390.395	244.141	375.735
Nitab4.5_0000154g0330.1	1.06847	4.40012	7.42689e-06	7.22987e-05	12.831	14.658	13.598	30.261	26.097	29.825
Nitab4.5_0000212g0180.1	1.06845	8.78492	1.61393e-06	1.79581e-05	291.484	307.089	310.56	698.492	459.519	740.043
Nitab4.5_0004509g0010.1	1.06824	6.43109	1.58742e-09	3.06682e-08	55.276	61.208	59.519	137.255	106.069	125.383
Nitab4.5_0001999g0030.1	1.06761	5.30318	6.99688e-05	0.000542062	25.985	26.999	26.896	74.348	40.496	52.457
Nitab4.5_0000337g0170.1	1.06717	5.18401	1.06719e-07	1.48762e-06	21.953	29.921	21.689	51.989	54.716	46.272
Nitab4.5_0002215g0010.1	1.06686	6.33974	1.60427e-11	4.07112e-10	54.491	52.621	58.207	123.179	107.997	114.146
Nitab4.5_0000391g0360.1	1.06672	4.75374	9.30882e-05	0.000700622	17.529	17.184	18.715	45.791	26.299	39.864
Nitab4.5_0004361g0040.1	1.06571	3.42558	0.00245898	0.0119196	6.661	6.596	6.679	12.097	13.603	15.383
Nitab4.5_0000045g0110.1	1.06569	8.87021	1.69846e-12	4.94823e-11	290.856	339.258	335.433	710.47	694.472	607.489
Nitab4.5_0005356g0040.1	1.06434	7.56715	1.12646e-08	1.87026e-07	109.148	139.025	142.538	305.952	266.16	241.736
Nitab4.5_0001651g0130.1	1.06386	6.21449	2.60122e-08	4.04762e-07	49.488	45.747	56.204	106.803	119.942	89.833
Nitab4.5_0000052g0230.1	1.06325	5.30131	6.91003e-09	1.18754e-07	24.955	25.206	28.698	60.32	53.236	52.21
Nitab4.5_0002322g0050.1	1.06319	4.87642	2.25575e-07	2.96333e-06	19.982	16.748	21.468	44.409	36.888	41.208
Nitab4.5_0000902g0070.1	1.06293	6.21418	1.76758e-08	2.82714e-07	46.437	50.204	55.644	115.361	89.149	112.118
Nitab4.5_0000647g0320.1	1.06242	3.22686	0.00517494	0.0224452	4.532	6.893	5.247	10.5	11.978	12.313
Nitab4.5_0004376g0070.1	1.06211	3.95751	0.000146024	0.00103794	9.986	9.657	9.983	20.524	21.828	19.394
Nitab4.5_0000754g0270.1	1.06132	8.58422	1.51039e-08	2.44107e-07	269.825	296.809	227.41	601.808	459.463	588.297
Nitab4.5_0000387g0090.1	1.06059	7.60642	8.60357e-05	0.000652928	142.971	157.031	103.096	271.566	208.889	354.403
Nitab4.5_0000634g0230.1	1.05987	4.50872	4.85059e-06	4.90509e-05	14.891	16.708	13.107	34.743	26.209	31.942
Nitab4.5_0000035g0400.1	1.05935	6.81687	2.27403e-09	4.26603e-08	77.445	75.876	79.095	183.595	162.522	136.307
Nitab4.5_0002055g0110.1	1.05902	5.6567	3.94298e-06	4.04847e-05	32.076	36.883	33.835	80.546	53.136	79.794
Nitab4.5_0000326g0250.1	1.05797	5.21777	5.32226e-06	5.32571e-05	31.988	26.068	17.433	50.785	57.707	47.281
Nitab4.5_0002632g0040.1	1.05778	2.9971	0.0126982	0.0470192	4.552	4.992	4.676	9.475	6.914	12.089
Nitab4.5_0002093g0230.1	1.05744	4.71097	5.56711e-07	6.81823e-06	15.656	18.065	18.304	37.52	32.271	37.836
Nitab4.5_0000406g0150.1	1.05687	3.92284	0.000520171	0.00313273	8.74	11.677	8.792	26.531	17.884	16.257
Nitab4.5_0004918g0040.1	1.05601	6.22331	1.73183e-06	1.92061e-05	51.94	37.339	63.664	115.408	100.904	101.788
Nitab4.5_0004409g0050.1	1.05417	4.81884	3.47679e-07	4.40869e-06	15.999	17.402	23.161	41.429	37.739	38.564
Nitab4.5_0000224g0020.1	1.05386	4.39021	1.38486e-05	0.000126568	12.615	15.084	13.678	26.662	32.103	25.679
Nitab4.5_0002040g0020.1	1.0535	4.01565	0.00014026	0.00100051	10.378	10.251	11.215	23.337	18.982	22.598
Nitab4.5_0004391g0040.1	1.0532	3.78351	0.000567917	0.00338373	8.269	9.716	8.701	19.344	17.604	17.075
Nitab4.5_0000715g0170.1	1.05293	4.16295	0.0125393	0.0466389	11.163	9.924	14.109	18.343	38.546	15.73
Nitab4.5_0001868g0030.1	1.05276	3.50838	0.00233966	0.0114463	7.514	5.913	7.7	15.22	11.048	17.377
Nitab4.5_0000073g0240.1	1.05231	4.74495	0.000167328	0.00117194	16.146	19.838	18.014	43.825	41.336	25.545
Nitab4.5_0002267g0020.1	1.05205	3.16777	0.00988958	0.0381463	4.816	5.497	5.047	11.645	10.275	11.069
Nitab4.5_0001691g0120.1	1.05204	7.46224	4.94722e-06	4.99274e-05	112.994	118.543	133.186	252.198	190.883	310.047
Nitab4.5_0003050g0030.1	1.05181	8.31754	3.50084e-15	1.41964e-13	219.376	231.312	211.97	446.699	479.789	440.909
Nitab4.5_0000083g0160.1	1.05177	8.64391	0.00145128	0.00762209	282.577	259.945	288.792	679.434	312.068	722.06
Nitab4.5_0001369g0020.1	1.05172	6.25306	2.36816e-08	3.70507e-07	51.636	50.719	54.132	129.103	96.993	99.11
Nitab4.5_0000880g0020.1	1.05132	5.62178	3.85035e-10	8.15276e-09	32.165	35.199	32.934	74.253	67.041	66.563
Nitab4.5_0000483g0260.1	1.05131	5.47277	1.60944e-08	2.58865e-07	30.134	27.989	32.022	69.891	56.699	60.132
Nitab4.5_0002181g0010.1	1.05116	5.26798	2.27115e-08	3.5672e-07	24.827	23.552	29.809	58.58	52.374	50.25
Nitab4.5_0000195g0220.1	1.04953	3.88493	0.00398623	0.0180175	10.731	7.656	9.252	22.324	24.786	11.103
Nitab4.5_0002208g0020.1	1.04864	6.8883	1.42646e-07	1.94388e-06	74.345	83.621	86.795	184.536	134.71	185.705
Nitab4.5_0001618g0160.1	1.04765	3.32045	0.00356315	0.0164119	5.562	6.893	5.187	12.252	13.155	12.123
Nitab4.5_0000444g0270.1	1.04747	5.97744	2.86742e-05	0.000244926	36.785	40.419	51.879	108.817	67.938	90.36
Nitab4.5_0000188g0240.1	1.04666	4.8315	3.38267e-07	4.29749e-06	19.324	15.975	21.929	40.583	35.588	41.231
Nitab4.5_0005418g0080.1	1.04661	4.83138	1.95705e-07	2.59643e-06	19.158	17.53	20.147	42.609	37.381	38.116
Nitab4.5_0000511g0050.1	1.04634	3.7435	0.000681183	0.00397829	9.172	8.32	8.331	19.427	15.183	17.769
Nitab4.5_0000978g0110.1	1.04633	6.31388	1.56334e-10	3.50625e-09	51.244	55.998	57.075	118.436	102.977	116.711
Nitab4.5_0000240g0150.1	1.04465	5.72444	0.00115594	0.00626944	30.929	41.439	36.198	75.242	46.749	101.295
Nitab4.5_0002601g0040.1	1.0434	4.81114	3.17072e-07	4.0513e-06	18.981	19.69	18.074	39.165	40.743	36.704
Nitab4.5_0001874g0080.1	1.04175	3.94624	0.000200865	0.00137563	9.201	11.786	9.062	21.99	15.777	23.17
Nitab4.5_0002526g0040.1	1.04048	4.31012	2.35687e-05	0.000205337	13.929	12.103	12.947	31.108	26.971	22.755
Nitab4.5_0001424g0090.1	1.04028	7.15239	6.17185e-07	7.47661e-06	92.404	83.928	119.558	212.2	172.92	221.3
Nitab4.5_0000980g0040.1	1.03988	6.45824	9.42033e-08	1.32884e-06	60.504	59.247	62.052	144.418	101.307	128.588
Nitab4.5_0000137g0130.1	1.03902	3.70175	0.000817319	0.00465288	7.455	7.705	9.072	19.284	18.567	13.265
Nitab4.5_0001036g0160.1	1.03871	4.99088	1.38706e-05	0.000126628	20.492	22.344	21.558	54.266	35.017	43.516
Nitab4.5_0001201g0060.1	1.03851	5.9306	1.7474e-09	3.35735e-08	43.504	43.846	38.13	94.67	76.936	85.632
Nitab4.5_0001292g0050.1	1.03807	7.03496	1.07642e-05	0.000100591	97.583	113.512	62.042	187.826	185.313	185.403
Nitab4.5_0001383g0030.1	1.03754	5.76561	3.8109e-08	5.72148e-07	39.963	40.36	31.942	74.372	86.438	68.557
Nitab4.5_0002209g0010.1	1.03741	3.26531	0.00429277	0.0191998	5.268	6.487	5.497	13.063	9.883	13.075
Nitab4.5_0001591g0130.1	1.0358	4.57843	3.37474e-06	3.51719e-05	14.439	16.094	17.623	32.502	31.577	33.545
Nitab4.5_0000801g0040.1	1.03551	8.32216	1.50851e-12	4.42696e-11	234.482	219.18	216.256	457.747	414.249	493.366
Nitab4.5_0000309g0320.1	1.03543	7.14144	6.41744e-10	1.3158e-08	88.922	105.529	100.012	218.624	177.974	204.998
Nitab4.5_0000715g0180.1	1.03441	5.33258	9.18057e-09	1.54469e-07	25.298	30.683	26.475	56.423	53.102	58.104
Nitab4.5_0001190g0040.1	1.03431	9.73593	8.33924e-10	1.69084e-08	565.468	704.088	518.054	1277.63	1208.76	1156.25
Nitab4.5_0003162g0060.1	1.03397	4.00375	0.000191942	0.00131947	13.664	8.726	8.381	24.803	19.374	19.316
Nitab4.5_0000568g0270.1	1.03376	4.75188	1.296e-05	0.000118951	18.069	17.61	18.835	36.221	30.647	44.02
Nitab4.5_0003063g0040.1	1.03289	5.4609	0.000403253	0.00253587	26.132	29.574	34.506	63.717	42.009	79.268
Nitab4.5_0000004g0180.1	1.03225	5.74415	9.60072e-07	1.12502e-05	40.395	36.814	33.284	85.635	59.052	81.027
Nitab4.5_0000023g0060.1	1.03026	8.46826	7.93232e-07	9.4272e-06	201.778	257.598	282.583	499.069	584.256	427.296
Nitab4.5_0000016g0140.1	1.03007	4.48985	0.00260728	0.0125206	16.038	16.471	12.306	31.108	41.751	19.181
Nitab4.5_0000863g0190.1	1.03004	4.32866	6.78392e-05	0.0005276	12.703	13.351	13.578	33.515	26.321	21.904
Nitab4.5_0002100g0170.1	1.02988	3.77041	0.000777268	0.00445194	9.966	7.25	8.942	21.43	15.284	16.694
Nitab4.5_0000233g0120.1	1.02977	5.04636	1.45674e-07	1.98245e-06	21.443	21.225	24.823	51.107	43.802	41.712
Nitab4.5_0000441g0200.1	1.02896	4.39966	2.13763e-05	0.000187749	12.517	14.688	15.4	31.072	25.402	29.5
Nitab4.5_0000627g0030.1	1.02869	3.87282	0.000450362	0.00278586	9.672	7.864	11.155	17.103	17.548	22.587
Nitab4.5_0002300g0140.1	1.02861	5.17408	9.77527e-08	1.37024e-06	22.748	24.919	26.205	53.348	44.283	52.591
Nitab4.5_0001393g0070.1	1.02841	5.29211	5.93129e-06	5.87944e-05	24.258	23.126	32.553	62.418	45.202	56.076
Nitab4.5_0000297g0050.1	1.02764	7.34532	1.6198e-10	3.62073e-09	107.304	125.971	107.091	254.213	223.501	214.13
Nitab4.5_0000317g0200.1	1.02622	4.71025	4.83451e-06	4.89128e-05	17.51	17.273	17.974	35.506	30.893	41.589
Nitab4.5_0000864g0040.1	1.02541	8.62695	0.000168401	0.0011774	258.436	292.748	279.67	580.128	736.873	368.554
Nitab4.5_0000329g0060.1	1.02536	4.37377	0.00273364	0.0130431	12.85	11.192	17.273	26.269	19.744	38.553
Nitab4.5_0000014g0130.1	1.02488	3.35682	0.00408619	0.0184071	5.326	8.428	4.736	14.553	9.581	14.363
Nitab4.5_0001477g0150.1	1.02472	5.52127	1.07505e-06	1.24569e-05	30.929	32.565	31.211	78.532	58.974	55.179
Nitab4.5_0006281g0050.1	1.02462	4.5716	0.00012163	0.000883316	14.41	17.956	15.08	36.9	24.047	36.491
Nitab4.5_0000504g0040.1	1.02222	3.72963	0.000933	0.00521965	5.562	8.993	10.744	16.15	14.948	19.584
Nitab4.5_0000652g0060.1	1.02175	4.74395	6.12794e-06	6.06838e-05	18.991	17.728	18.024	39.784	40.462	29.377
Nitab4.5_0001018g0010.1	1.02162	3.83573	0.000540031	0.00323583	8.73	8.359	9.783	20.917	14.253	21.041
Nitab4.5_0002053g0130.1	1.02149	4.19569	0.000539465	0.00323534	13.164	11.241	11.565	26.96	16.662	29.455
Nitab4.5_0003465g0090.1	1.02098	6.33574	0.00012478	0.000900973	38.766	65.843	64.005	127.029	124.749	88.926
Nitab4.5_0002184g0010.1	1.02083	5.1419	2.34259e-05	0.000204447	22.503	18.026	31.832	44.159	53.315	48.961
Nitab4.5_0002347g0020.1	1.02065	4.02648	0.000218497	0.00148072	11.124	10.647	9.823	25.554	18.623	20.593
Nitab4.5_0002000g0050.1	1.02061	8.09309	1.72779e-09	3.32839e-08	194.009	185.713	195.208	430.037	410.462	321.542
Nitab4.5_0003307g0030.1	1.02017	7.35053	4.51656e-06	4.59275e-05	92.875	124.991	124.935	277.311	188.955	226.32
Nitab4.5_0000608g0030.1	1.01982	7.05259	0.000104561	0.000775629	78.612	85.265	114.281	185.967	142.307	233.692
Nitab4.5_0002724g0070.1	1.01891	5.7644	2.00319e-06	2.18651e-05	32.959	34.377	44.969	80.391	62.503	85.015
Nitab4.5_0000008g0890.1	1.01882	4.60916	1.11867e-05	0.0001042	16.509	15.46	17.603	37.043	27.229	35.326
Nitab4.5_0000934g0220.1	1.01842	7.75105	2.59149e-09	4.79437e-08	146.591	133.201	174.03	332.411	291.45	291.706
Nitab4.5_0004186g0010.1	1.01841	5.06864	5.13062e-06	5.15708e-05	21.178	24.77	22.92	56.757	42.703	39.942
Nitab4.5_0007940g0040.1	1.01822	4.66684	1.71282e-05	0.000153283	16.372	18.957	15.761	38.402	37.874	26.621
Nitab4.5_0001305g0010.1	1.01813	4.72351	1.33634e-06	1.51311e-05	17.274	18.838	17.753	36.137	35.375	36.805
Nitab4.5_0001598g0020.1	1.01776	6.36842	5.16854e-08	7.58392e-07	58.679	53.492	60.89	132.523	97.464	119.154
Nitab4.5_0000167g0310.1	1.01663	5.69738	8.77151e-10	1.76955e-08	36.294	37.933	33.835	76.768	68.184	73.263
Nitab4.5_0000610g0150.1	1.01584	5.69695	0.000145864	0.00103754	29.212	46.292	32.413	61.727	64.666	91.279
Nitab4.5_0000915g0120.1	1.01503	7.08199	3.29484e-06	3.44465e-05	84.664	95.922	104.098	189.804	232.521	151.791
Nitab4.5_0004174g0030.1	1.01485	5.58845	2.52943e-05	0.000218567	32.508	28.425	39.492	78.282	51.219	71.56
Nitab4.5_0001273g0010.1	1.01448	4.31941	6.95953e-05	0.000539794	12.026	14.737	12.847	27.52	20.932	31.382
Nitab4.5_0004557g0010.1	1.01415	3.99159	0.000261692	0.00173364	9.77	11.093	10.033	21.239	23.285	18.363
Nitab4.5_0002421g0020.1	1.01405	3.56972	0.00300481	0.0141453	7.857	7.963	6.649	15.304	15.273	14.419
Nitab4.5_0000078g0430.1	1.01405	3.5698	0.00300481	0.0141453	8.652	4.16	9.523	14.398	14.937	15.439
Nitab4.5_0002334g0130.1	1.01401	3.44207	0.00385779	0.0175357	6.582	4.804	8.942	13.766	14.354	12.705
Nitab4.5_0001273g0030.1	1.01391	3.14662	0.0135343	0.0494943	5.268	5.22	5.948	10.226	13.077	9.322
Nitab4.5_0006590g0030.1	1.01334	5.43624	8.57487e-05	0.000650996	28.604	37.923	22.99	62.656	71.389	46.754
Nitab4.5_0001619g0100.1	1.01309	6.93084	2.30005e-09	4.3068e-08	82.075	80.798	93.153	177.647	187.252	151.231
Nitab4.5_0003077g0010.1	1.01243	6.84703	2.06674e-10	4.53891e-09	82.81	74.886	84.582	171.319	168.606	146.469
Nitab4.5_0000898g0100.1	1.01041	4.68169	3.71286e-06	3.82982e-05	20.472	16.183	16.312	38.664	30.747	35.953
Nitab4.5_0001146g0100.1	1.0097	8.26628	4.00096e-10	8.43081e-09	238.367	232.976	181.259	424.041	436.637	445.558
Nitab4.5_0000084g0310.1	1.00966	6.15885	7.92704e-09	1.35421e-07	43.72	54.691	50.657	110.426	90.606	99.883
Nitab4.5_0004701g0020.1	1.00951	7.09571	2.94035e-12	8.19746e-11	94.837	93.188	100.703	203.034	189.74	186.288
Nitab4.5_0001645g0050.1	1.00881	8.48884	0.000202567	0.00138539	262.115	218.526	280.34	622.57	571.023	333.093
Nitab4.5_0000568g0180.1	1.00793	4.36338	0.000415847	0.00260527	11.035	14.668	15.721	30.118	33.134	19.909
Nitab4.5_0002576g0010.1	1.00708	4.82363	8.61027e-07	1.01787e-05	18.186	22.948	16.662	37.937	37.459	41.107
Nitab4.5_0001701g0050.1	1.00541	3.64456	0.00134591	0.00715478	7.337	8.112	8.631	17.33	15.127	15.282
Nitab4.5_0001190g0020.1	1.00475	6.59589	1.24485e-06	1.42138e-05	59.072	82.106	62.863	128.626	158.051	120.308
Nitab4.5_0000066g0030.1	1.00443	6.29882	3.57036e-09	6.43337e-08	56.158	53.294	55.543	121.153	96.366	113.731
Nitab4.5_0003408g0140.1	1.00398	5.22597	0.00918223	0.0359709	17.931	37.487	21.899	50.928	70.089	33.41
Nitab4.5_0001952g0150.1	1.00344	3.3914	0.00465033	0.0205201	5.817	6.458	7.31	13.182	10.679	14.419
Nitab4.5_0001254g0050.1	1.00214	5.33653	2.30295e-08	3.60868e-07	27.397	30.683	25.944	59.367	51.769	56.233
Nitab4.5_0005325g0010.1	1.00209	3.2466	0.0059444	0.0252213	4.62	6.903	5.728	14.565	7.664	13.153
Nitab4.5_0002503g0060.1	1.00208	3.24546	0.00817969	0.0325646	6.396	4.853	5.798	10.62	11.945	12.481
Nitab4.5_0001422g0050.1	1.002	3.2445	0.00864242	0.0342236	8.044	5.477	3.445	8.701	15.374	10.375
Nitab4.5_0005919g0020.1	1.00195	4.10245	0.000172709	0.00120416	11.742	10.895	11.625	25.208	19.833	23.775
Nitab4.5_0000044g0240.1	1.00148	5.67792	0.00336011	0.0156382	38.237	22.879	45.821	99.187	56.464	58.955
Nitab4.5_0001364g0040.1	1.00099	5.69709	3.1983e-09	5.83632e-08	35.147	33.268	39.953	75.254	67.501	73.464
Nitab4.5_0000023g0100.1	1.00087	6.63918	6.59313e-05	0.000514957	65.399	56.484	88.577	172.475	116.401	131.411
Nitab4.5_0000202g0320.1	1.00052	7.51637	8.43492e-09	1.43487e-07	115.779	137.757	135.749	272.603	223.77	277.118
Nitab4.5_0001215g0040.1	1.00016	5.98525	3.94009e-05	0.000325605	46.526	42.578	43.958	70.558	115.728	78.775
Nitab4.5_0000326g0120.1	-1.00039	7.16143	1.08544e-05	0.000101387	158.126	250.794	191.183	110.522	94.707	92.578
Nitab4.5_0000287g0140.1	-1.0004	8.0696	3.84348e-12	1.04966e-10	366.202	367.049	401.39	201.127	190.244	173.807
Nitab4.5_0000043g0320.1	-1.00171	5.10821	0.00934818	0.0365212	58.218	42.756	37.53	25.828	32.372	10.621
Nitab4.5_0000987g0030.1	-1.00287	4.43754	3.66423e-05	0.000305195	30.399	29.425	24.983	12.848	14.903	14.072
Nitab4.5_0000350g0190.1	-1.00288	9.30101	0.000872399	0.00492731	843.592	962.855	873.955	398.691	641.045	290.944
Nitab4.5_0004301g0030.1	-1.00295	3.98554	0.000480893	0.00293891	18.804	20.135	21.298	9.928	8.382	11.316
Nitab4.5_0002399g0100.1	-1.00315	3.31752	0.0067711	0.0279721	12.183	13.648	9.463	3.23	8.897	4.975
Nitab4.5_0004234g0080.1	-1.00317	9.06386	3.21508e-09	5.86161e-08	716.581	767.871	787.671	344.914	443.103	339.289
Nitab4.5_0000430g0170.1	-1.00375	6.31387	2.2309e-05	0.000195209	85.9	112.026	131.704	48.461	63.355	51.045
Nitab4.5_0005185g0020.1	-1.00392	5.94087	7.96918e-08	1.13854e-06	84.586	78.501	90.53	34.981	49.046	41.152
Nitab4.5_0004784g0030.1	-1.00478	6.93936	0.00413869	0.0186227	155.154	140.837	217.307	111.249	97.8	47.135
Nitab4.5_0001504g0010.1	-1.00478	5.61417	0.00103427	0.00570042	82.781	46.025	70.763	26.781	43.622	28.357
Nitab4.5_0000691g0220.1	-1.00637	4.49211	0.00142303	0.00751104	32.145	32.624	23.171	11.668	21.559	10.7
Nitab4.5_0001802g0130.1	-1.00673	8.33175	0.00923216	0.0361453	396.62	656.311	312.853	134.824	286.497	253.276
Nitab4.5_0001735g0110.1	-1.00802	7.52112	0.00129436	0.00691554	225.458	191.487	356.04	111.964	107.358	164.205
Nitab4.5_0000351g0060.1	-1.00857	6.71886	0.00397349	0.017968	189.497	148.394	103.016	79.164	94.909	43.348
Nitab4.5_0001620g0010.1	-1.01002	3.54639	0.00361818	0.016631	14.528	17.293	11.085	6.901	8.729	5.064
Nitab4.5_0000250g0210.1	-1.01003	3.54632	0.00361818	0.016631	14.537	16.243	12.356	5.018	8.863	6.622
Nitab4.5_0003062g0070.1	-1.01003	3.54698	0.00361818	0.016631	12.762	13.905	16.111	6.794	7.575	6.117
Nitab4.5_0000274g0230.1	-1.01006	6.56739	2.78553e-09	5.13442e-08	122.312	131.171	142.388	70.141	67.602	57.185
Nitab4.5_0000338g0120.1	-1.01053	4.20105	0.000718508	0.00416598	20.521	22.275	28.087	7.652	13.11	14.588
Nitab4.5_0000787g0260.1	-1.01058	3.95154	0.000576611	0.00343247	18.755	20.244	19.346	10.155	9.457	9.523
Nitab4.5_0001210g0090.1	-1.01156	6.40729	1.11684e-08	1.85582e-07	125.814	124.654	103.617	56.339	65.529	53.196
Nitab4.5_0002595g0020.1	-1.01298	3.12983	0.0119678	0.0448023	10.879	7.151	12.056	4.982	2.813	7.002
Nitab4.5_0000318g0080.1	-1.01298	3.12921	0.0119678	0.0448023	9.182	11.727	9.543	4.791	5.289	5.288
Nitab4.5_0000539g0100.1	-1.01299	3.12885	0.0119678	0.0448023	10.535	8.112	11.675	2.539	6.734	5.568
Nitab4.5_0001553g0040.1	-1.01615	4.17256	0.000869126	0.00491578	22.973	17.085	28.628	10.989	10.018	12.896
Nitab4.5_0000332g0240.1	-1.01627	3.26405	0.00817969	0.0325646	12.605	10.895	10.654	6.567	5.771	4.426
Nitab4.5_0000143g0190.1	-1.01628	3.26425	0.00817969	0.0325646	9.162	10.796	13.768	5.304	7.104	4.683
Nitab4.5_0002859g0140.1	-1.01703	7.2305	0.00164151	0.00847503	246.626	216.476	170.215	120.95	131.494	58.552
Nitab4.5_0004646g0020.1	-1.01729	6.15228	3.73522e-05	0.000310592	97.465	88.058	109.284	44.79	35.689	64.098
Nitab4.5_0000173g0140.1	-1.01834	4.60539	1.00762e-05	9.49574e-05	34.735	31.545	29.99	19.165	17.368	11.126
Nitab4.5_0004136g0010.1	-1.01834	8.92558	9.13512e-07	1.07422e-05	833.871	531.498	706.724	322.518	350.67	343.378
Nitab4.5_0000050g0280.1	-1.0185	4.3016	7.50491e-05	0.000577853	30.429	21.987	24.332	10.441	14.746	12.504
Nitab4.5_0000154g0250.1	-1.01894	3.38711	0.00634012	0.0266023	15.312	11.717	11.215	5.435	4.818	7.764
Nitab4.5_0001988g0050.1	-1.01894	3.38681	0.00634012	0.0266023	15.303	12.638	10.504	5.769	6.802	5.994
Nitab4.5_0000647g0120.1	-1.01923	4.60547	5.79292e-05	0.000459791	26.554	34.546	34.906	11.895	16.741	18.229
Nitab4.5_0001696g0070.1	-1.01998	8.31378	0.000110744	0.000816203	410.716	479.531	461.61	217.241	295.719	150.895
Nitab4.5_0000563g0260.1	-1.02039	4.70319	5.63257e-05	0.000448661	35.569	27.722	40.654	16.436	15.105	19.416
Nitab4.5_0000391g0120.1	-1.02186	4.21179	0.00337393	0.0156916	22.071	19.699	29.649	14.004	6.152	14.778
Nitab4.5_0001105g0070.1	-1.02218	8.62416	0.000689274	0.00401888	466.747	555.238	656.517	185.561	379.233	256.514
Nitab4.5_0004409g0010.1	-1.023	3.60592	0.00221025	0.0109358	15.45	13.608	16.231	8.546	7.945	5.736
Nitab4.5_0002011g0060.1	-1.02301	5.6998	6.32022e-05	0.00049654	80.378	81.937	52.049	28.247	36.26	39.651
Nitab4.5_0001803g0030.1	-1.024	4.87836	0.000104222	0.000773403	38.708	47.738	31.432	15.661	22.601	19.047
Nitab4.5_0002456g0140.1	-1.02446	5.67864	4.37744e-05	0.000356753	61.661	59.564	89.909	31.644	32.204	39.303
Nitab4.5_0000252g0170.1	-1.02447	3.70293	0.00260395	0.012514	18	19.214	10.784	7.401	9.625	6.543
Nitab4.5_0000987g0090.1	-1.02493	4.99894	1.3088e-07	1.79451e-06	42.514	40.34	45.55	21.084	22.455	19.797
Nitab4.5_0003135g0010.1	-1.02714	3.8816	0.000612603	0.0036263	18.461	17.134	19.426	8.629	7.575	10.095
Nitab4.5_0003381g0020.1	-1.02906	5.38006	1.65666e-05	0.000148922	45.093	64.684	60.76	23.587	32.17	26.71
Nitab4.5_0003337g0020.1	-1.02981	4.66116	5.71004e-06	5.67414e-05	36.108	31.119	33.224	15.899	20.304	11.719
Nitab4.5_0000385g0200.1	-1.03069	3.20795	0.00988958	0.0381463	11.281	10.251	11.055	7.306	5.031	3.16
Nitab4.5_0003259g0120.1	-1.03069	4.18172	0.000120576	0.000876926	22.061	20.819	26.735	11.823	12.965	9.165
Nitab4.5_0000537g0060.1	-1.03084	4.75606	2.98124e-05	0.000253462	33.254	32.456	42.076	21.251	18.242	13.31
Nitab4.5_0000755g0100.1	-1.03134	7.06153	1.26813e-06	1.4414e-05	188.064	157.407	217.307	86.529	108.658	78.562
Nitab4.5_0003058g0010.1	-1.03205	3.33565	0.00765413	0.0309324	12.173	11.42	12.406	5.316	5.771	5.736
Nitab4.5_0002003g0050.1	-1.0332	6.22834	0.000911676	0.00512622	145.845	74.271	92.642	60.463	52.351	38.698
Nitab4.5_0000428g0040.1	-1.03388	7.57875	0.000201231	0.00137767	221.308	252.884	336.234	167.35	93.934	132.33
Nitab4.5_0007834g0020.1	-1.03432	3.5616	0.00323984	0.0151406	11.506	15.718	15.801	3.933	6.925	10.095
Nitab4.5_0000743g0240.1	-1.0349	3.66255	0.00134591	0.00715478	14.567	14.648	17.763	7.628	8.258	7.148
Nitab4.5_0000036g0150.1	-1.03503	3.45179	0.0117408	0.0440346	16.244	12.489	11.055	4.005	11.295	4.638
Nitab4.5_0000608g0020.1	-1.03714	4.0077	0.000261692	0.00173364	18.02	20.254	23.171	11.466	6.813	10.957
Nitab4.5_0001439g0100.1	-1.04177	9.89553	2.1574e-07	2.8453e-06	1292.15	1360.83	1434.56	551.619	822.571	600.195
Nitab4.5_0001422g0130.1	-1.04481	4.99324	8.19818e-07	9.70868e-06	47.252	37.953	44.339	21.144	18.085	23.45
Nitab4.5_0000159g0220.1	-1.0453	4.37966	2.55319e-05	0.000220337	27.005	27.553	27.326	12.824	13.805	12.582
Nitab4.5_0002450g0020.1	-1.04542	4.19114	8.89921e-05	0.000673581	24.347	23.404	22.87	10.381	9.009	13.445
Nitab4.5_0000953g0030.1	-1.04584	3.71678	0.00112037	0.00610123	14.91	17.322	16.322	6.079	8.191	8.493
Nitab4.5_0001005g0010.1	-1.04621	3.40399	0.00465033	0.0205201	13.223	11.935	13.968	5.22	4.785	7.977
Nitab4.5_0001231g0030.1	-1.0463	3.5153	0.00749274	0.0304334	14.047	18.858	9.422	5.018	8.382	5.826
Nitab4.5_0003539g0030.1	-1.04639	3.28164	0.0059444	0.0252213	11.546	11.608	11.515	4.04	7.799	5.602
Nitab4.5_0001727g0040.1	-1.04758	5.51832	3.23629e-08	4.95516e-07	71.579	59.603	58.107	27.913	32.507	29.982
Nitab4.5_0002415g0030.1	-1.04989	4.67536	7.38527e-06	7.19285e-05	39.316	29.475	33.084	19.153	13.883	16.638
Nitab4.5_0004506g0110.1	-1.05069	4.97574	0.000182283	0.00126258	49.841	31.357	46.041	19.118	25.313	16.828
Nitab4.5_0000294g0180.1	-1.05095	4.85497	1.73104e-05	0.000154844	36.226	33.813	46.331	16.424	22.03	17.624
Nitab4.5_0000006g0480.1	-1.05253	4.22907	5.47589e-05	0.000437919	23.091	24.186	25.824	12.932	11.665	10.621
Nitab4.5_0001913g0080.1	-1.05386	4.8785	2.14314e-07	2.82835e-06	39.257	41.588	38.411	18.641	22.478	15.383
Nitab4.5_0002700g0080.1	-1.05451	3.93939	0.000375701	0.0023888	19.609	21.403	17.453	9.916	9.323	8.627
Nitab4.5_0001808g0010.1	-1.05511	7.01758	0.0111198	0.0421625	236.179	186.377	127.528	102.977	118.552	41.656
Nitab4.5_0000694g0010.1	-1.05517	3.85655	0.000540031	0.00323583	18.804	19.858	16.422	9.237	10.791	6.061
Nitab4.5_0001825g0010.1	-1.05605	5.12904	6.69468e-08	9.6887e-07	43.014	49.442	49.876	24.54	22.713	20.671
Nitab4.5_0002311g0040.1	-1.05624	6.19738	8.35661e-06	8.05679e-05	98.75	97.408	110.957	40.678	66.055	39.752
Nitab4.5_0000753g0210.1	-1.05889	4.26487	0.000810083	0.00461823	28.526	27.633	18.545	7.771	11.25	16.111
Nitab4.5_0000273g0230.1	-1.05898	3.46901	0.00385779	0.0175357	12.468	12.103	15.891	5.506	6.477	7.137
Nitab4.5_0000772g0050.1	-1.05898	3.4684	0.00385779	0.0175357	14.498	11.816	14.549	5.065	9.334	4.28
Nitab4.5_0003481g0080.1	-1.05913	4.32907	0.000797012	0.00455277	22.826	21.264	34.446	12.765	10.074	14.756
Nitab4.5_0000694g0180.1	-1.05926	4.26553	3.36225e-05	0.000282624	25.789	27.009	22.47	12.538	11.9	11.641
Nitab4.5_0002249g0020.1	-1.0604	3.35253	0.0056094	0.0239942	10.673	12.143	13.618	4.315	8.113	3.921
Nitab4.5_0002303g0040.1	-1.0611	4.05937	0.00248141	0.0120138	29.899	16.094	18.735	10.381	12.023	8.1
Nitab4.5_0000009g0500.1	-1.06123	8.05969	2.24885e-13	7.3281e-12	367.398	403.417	372.762	197.79	167.441	180.025
Nitab4.5_0000380g0050.1	-1.06175	4.06086	0.00018248	0.00126351	21.208	18.491	24.452	10.381	6.802	13.4
Nitab4.5_0001119g0100.1	-1.06211	3.22656	0.00717742	0.0294025	12.87	10.479	9.863	6.114	4	5.199
Nitab4.5_0001480g0150.1	-1.06211	3.22684	0.00717742	0.0294025	9.966	10.875	12.296	5.197	4.28	5.848
Nitab4.5_0003013g0020.1	-1.06211	3.22605	0.00717742	0.0294025	13.851	9.399	9.843	5.042	6.779	3.047
Nitab4.5_0002641g0060.1	-1.06223	3.22569	0.0100719	0.0387602	11.948	14.084	7.5	4.851	7.463	3.518
Nitab4.5_0003553g0010.1	-1.06278	3.98447	0.000229821	0.00154442	19.001	23.473	19.125	8.248	8.639	12.369
Nitab4.5_0001453g0080.1	-1.06425	3.08826	0.0104895	0.040167	9.996	8.983	10.704	5.125	3.339	4.863
Nitab4.5_0000008g0310.1	-1.06434	5.90238	5.58843e-09	9.76297e-08	82.751	80.858	85.633	32.085	39.375	46.855
Nitab4.5_0001223g0110.1	-1.06513	6.04146	5.02654e-05	0.000404562	78.818	107.966	89.448	37.961	34.143	58.675
Nitab4.5_0001883g0030.1	-1.06526	3.82048	0.000647768	0.00380083	15.862	17.441	20.097	10.798	8.527	6.241
Nitab4.5_0000337g0200.1	-1.06567	4.6607	5.24996e-06	5.26465e-05	38.276	34.179	29.249	18.271	16.942	13.131
Nitab4.5_0000069g0620.1	-1.06662	4.90766	2.04735e-07	2.70906e-06	43.308	39.27	38.901	18.748	20.685	18.509
Nitab4.5_0003131g0030.1	-1.06669	4.23823	4.01685e-05	0.000331267	21.649	25.711	25.794	10.214	10.242	15.058
Nitab4.5_0000092g0390.1	-1.06833	4.17032	0.00140821	0.00744846	24.563	29.802	16.041	9.559	14.332	8.605
Nitab4.5_0002152g0040.1	-1.06854	6.22613	2.49722e-09	4.63707e-08	101.37	105.995	106.991	43.062	46.849	59.336
Nitab4.5_0000108g0110.1	-1.0692	7.74867	0.000762678	0.00437907	379.552	284.28	257.781	171.128	179.767	86.237
Nitab4.5_0000691g0200.1	-1.07055	3.53069	0.00233966	0.0114463	15.597	16.253	10.824	6.663	6.925	7.361
Nitab4.5_0001101g0080.1	-1.07212	3.95097	0.000275246	0.00181217	20.08	20.343	18.524	10.286	7.015	11.137
Nitab4.5_0000171g0300.1	-1.07212	3.95	0.000275246	0.00181217	22.12	21.482	14.96	8.403	10.567	9.938
Nitab4.5_0000946g0010.1	-1.07302	5.06868	0.00217619	0.0108018	39.1	34.982	63.073	19.046	16.315	29.377
Nitab4.5_0006230g0010.1	-1.07462	7.05096	3.96381e-12	1.08105e-10	191.301	176.611	197.211	84.849	96.186	85.856
Nitab4.5_0000102g0360.1	-1.07468	4.87081	0.00601147	0.0254467	49.596	46.807	22.049	19.63	23.139	12.806
Nitab4.5_0000439g0160.1	-1.07588	3.30052	0.0067711	0.0279721	9.907	10.974	14.86	6.055	3.843	5.792
Nitab4.5_0001953g0090.1	-1.07589	3.29981	0.00429277	0.0191998	9.623	12.281	13.818	5.363	8.863	2.991
Nitab4.5_0000529g0100.1	-1.07781	4.07015	0.000133984	0.000958813	22.826	18.432	24.052	10.298	13.021	7.686
Nitab4.5_0002700g0020.1	-1.07817	4.78647	3.77499e-07	4.74783e-06	38.413	39.716	33.144	19.415	17.335	15.293
Nitab4.5_0000107g0180.1	-1.07855	3.68847	0.00391723	0.0177576	20.364	16.778	11.255	7.533	11.284	4.694
Nitab4.5_0000148g0050.1	-1.07946	3.16851	0.00867309	0.0343179	10.937	10.865	10.354	4.875	4.975	5.535
Nitab4.5_0001223g0190.1	-1.08039	4.69544	1.70758e-06	1.89476e-05	37.011	32.892	34.476	17.497	11.642	19.921
Nitab4.5_0000307g0190.1	-1.08109	3.59073	0.00141497	0.00747634	16.539	13.737	14.339	7.652	5.849	7.383
Nitab4.5_0001970g0070.1	-1.0816	4.46151	0.00171969	0.00880371	31.831	17.887	37.6	13.957	12.259	15.383
Nitab4.5_0001348g0050.1	-1.08257	4.1804	5.73622e-05	0.000456193	25.063	25.474	20.187	9.344	11.082	12.873
Nitab4.5_0001558g0070.1	-1.08341	4.59771	2.77225e-05	0.000237303	33.303	25.523	38.441	16.591	14.701	14.487
Nitab4.5_0000001g0070.1	-1.08396	3.02371	0.0126982	0.0470192	8.936	11.964	7.26	3.373	4.942	4.414
Nitab4.5_0000113g0220.1	-1.08396	3.02444	0.0126982	0.0470192	7.965	8.32	11.836	5.792	4.628	3.675
Nitab4.5_0000509g0070.1	-1.08581	5.4494	1.19481e-06	1.36813e-05	54.344	54.384	72.245	31.799	24.203	28.391
Nitab4.5_0000101g0040.1	-1.08696	5.55856	2.72722e-06	2.89802e-05	76.434	64.694	55.333	26.293	27.016	37.903
Nitab4.5_0000947g0070.1	-1.0874	3.74331	0.000933	0.00521965	17.157	15.193	17.854	8.987	6.914	7.966
Nitab4.5_0003914g0040.1	-1.08758	7.64165	9.87452e-06	9.34077e-05	294.309	328.532	235.411	101.213	132.48	167.566
Nitab4.5_0000249g0110.1	-1.08818	3.37	0.00408619	0.0184071	15.469	9.102	13.127	7.604	4.605	6.263
Nitab4.5_0000355g0060.1	-1.08853	5.70876	4.05879e-09	7.24196e-08	78.455	75.232	64.225	29.749	36.753	35.662
Nitab4.5_0004296g0040.1	-1.08878	5.70986	4.93643e-10	1.02789e-08	66.645	76.322	76.04	33.122	34.837	34.105
Nitab4.5_0000902g0360.1	-1.0889	4.21775	0.000444243	0.0027514	31.086	22.482	19.826	8.212	13.233	12.201
Nitab4.5_0001040g0140.1	-1.08972	4.54365	0.00705861	0.0290165	33.695	38.616	21.268	8.915	22.747	11.17
Nitab4.5_0002887g0060.1	-1.09067	6.8097	0.000332061	0.00213363	168.848	140.679	168.753	67.424	107.414	48.054
Nitab4.5_0001304g0080.1	-1.09272	5.45278	3.40378e-06	3.54378e-05	51.489	59.207	71.174	23.992	25.156	34.665
Nitab4.5_0002152g0050.1	-1.0929	3.88135	0.000827195	0.0047034	14.969	16.342	24.653	9.499	8.729	7.372
Nitab4.5_0000651g0150.1	-1.09367	4.08086	9.8027e-05	0.000734868	19.187	22.71	23.701	9.845	10.589	10.689
Nitab4.5_0004274g0040.1	-1.09377	4.77175	0.000414703	0.00259892	46.957	37.18	26.535	14.553	22.579	13.445
Nitab4.5_0000718g0060.1	-1.09463	3.54617	0.0017004	0.00872499	13.449	14.767	15.5	6.889	7.093	6.353
Nitab4.5_0000611g0120.1	-1.0952	5.862	0.0011194	0.00609928	105.578	88.553	50.827	46.232	40.597	26.867
Nitab4.5_0000486g0050.1	-1.09529	6.64348	4.58114e-09	8.10196e-08	135.692	125.476	164.738	69.057	65.988	62.35
Nitab4.5_0001257g0040.1	-1.09845	3.10765	0.0126353	0.0468554	11.82	13.321	6.068	4.35	6.04	3.316
Nitab4.5_0000130g0120.1	-1.09924	3.43578	0.00245898	0.0119196	14.322	14.213	11.105	5.59	7.384	5.355
Nitab4.5_0004931g0020.1	-1.09924	3.43571	0.00245898	0.0119196	13.988	15.698	10.053	3.218	6.656	8
Nitab4.5_0003134g0160.1	-1.09925	3.43602	0.00245898	0.0119196	13.507	11.746	14.539	4.076	7.989	6.274
Nitab4.5_0000472g0070.1	-1.09925	3.43545	0.00245898	0.0119196	14.214	12.965	12.486	4.756	9.861	3.798
Nitab4.5_0000446g0010.1	-1.09966	8.37258	1.60024e-14	6.04926e-13	461.745	452.968	519.066	231.293	216.924	217.569
Nitab4.5_0000707g0260.1	-1.1025	4.22774	7.58371e-05	0.000583248	30.419	22.136	20.727	13.683	11.553	8.941
Nitab4.5_0000614g0060.1	-1.10269	4.53021	2.10431e-05	0.000184991	33.656	25.85	32.723	15.852	17.077	9.647
Nitab4.5_0005911g0010.1	-1.10353	3.84421	0.000344864	0.00220882	17.804	17.342	19.426	7.473	8.46	9.322
Nitab4.5_0000262g0070.1	-1.10426	4.73417	2.97423e-07	3.81481e-06	36.324	38.735	32.283	15.161	17.054	17.669
Nitab4.5_0003364g0070.1	-1.10428	5.27896	1.56299e-08	2.51797e-07	58.336	47.471	54.462	26.161	23.329	24.895
Nitab4.5_0000397g0150.1	-1.10479	3.31707	0.00308114	0.0144775	13.154	13.519	9.503	4.35	5.928	6.05
Nitab4.5_0000073g0550.1	-1.10504	4.16159	0.00101471	0.0056049	26.269	17.263	26.615	9.952	6.925	15.473
Nitab4.5_0000446g0130.1	-1.10551	3.31644	0.00732216	0.0298493	15.43	11.479	9.092	4.458	9.121	2.286
Nitab4.5_0000302g0040.1	-1.10715	5.01179	0.000811316	0.00462395	48.34	55.038	29.189	16.245	27.363	17.366
Nitab4.5_0000500g0090.1	-1.10731	4.84585	0.0048703	0.0213221	48.311	40.29	28.247	16.09	28.204	9.366
Nitab4.5_0001677g0080.1	-1.10775	3.75582	0.000681183	0.00397829	16.99	14.866	18.595	7.258	8.426	7.776
Nitab4.5_0003298g0070.1	-1.10923	7.88472	1.12527e-09	2.22099e-08	291.68	365.554	364.652	147.159	177.38	146.335
Nitab4.5_0000154g0150.1	-1.11073	3.89165	0.000208973	0.00142193	19.923	21.244	16.261	7.366	9.95	8.862
Nitab4.5_0002271g0010.1	-1.11124	5.05744	3.27428e-05	0.000276146	36.51	43.994	55.674	22.228	15.811	24.369
Nitab4.5_0000113g0210.1	-1.11158	3.18772	0.00624248	0.0262695	11.3	10.815	10.183	4.565	4.706	5.546
Nitab4.5_0000075g0090.1	-1.11158	3.18798	0.00624248	0.0262695	10.761	9.112	12.366	3.933	4.191	6.521
Nitab4.5_0000883g0080.1	-1.11158	3.18772	0.00624248	0.0262695	11.418	9.746	11.435	4.183	5.726	4.201
Nitab4.5_0000137g0340.1	-1.11202	3.66093	0.00288938	0.0137048	21.306	13.47	12.627	5.864	6.656	9.848
Nitab4.5_0000394g0010.1	-1.11376	6.69081	8.43707e-05	0.000641262	122.734	131.537	187.167	90.76	55.623	56.479
Nitab4.5_0001965g0080.1	-1.11442	5.25098	9.68579e-06	9.19257e-05	51.872	51.462	54.031	25.041	32.563	15.013
Nitab4.5_0001217g0030.1	-1.11503	4.81219	2.23764e-05	0.000195713	32.783	34.902	46.782	20.715	14.746	17.601
Nitab4.5_0002715g0060.1	-1.11511	4.61837	9.73586e-07	1.13952e-05	29.251	36.794	32.593	14.255	14.276	16.111
Nitab4.5_0000741g0010.1	-1.11538	4.13061	0.000104863	0.000777583	21.914	27.207	19.866	9.142	13.536	8.874
Nitab4.5_0001163g0120.1	-1.11562	6.44359	1.09238e-11	2.83664e-10	132.043	123.842	115.232	59.51	50.816	59.403
Nitab4.5_0002367g0100.1	-1.11572	6.72612	1.74602e-07	2.33497e-06	170.221	145.314	137.812	55.612	86.337	64.77
Nitab4.5_0004608g0060.1	-1.11621	3.80774	0.00366109	0.0168054	15.597	12.083	25.303	8.272	6.869	9.647
Nitab4.5_0000391g0110.1	-1.11669	5.3179	6.7422e-07	8.1283e-06	60.651	46.401	58.457	25.613	30.333	19.551
Nitab4.5_0000181g0080.1	-1.11693	4.23691	1.85597e-05	0.000164845	23.484	25.523	25.353	7.962	12.427	13.187
Nitab4.5_0000351g0110.1	-1.11707	5.88676	9.25222e-11	2.13717e-09	89.657	78.194	81.968	38.724	34.243	41.757
Nitab4.5_0002202g0020.1	-1.11744	3.939	0.000174668	0.00121613	18.491	19.283	20.838	10.691	9.446	7.081
Nitab4.5_0002937g0030.1	-1.1201	3.04561	0.00910331	0.0357036	9.162	10.172	9.312	4.994	3.552	4.571
Nitab4.5_0000380g0140.1	-1.12057	3.71519	0.000947173	0.00527981	18.432	19.224	11.786	5.018	9.11	7.888
Nitab4.5_0000305g0190.1	-1.12125	6.72522	2.75946e-09	5.09106e-08	144.589	166.281	143.029	62.037	83.3	61.409
Nitab4.5_0001366g0100.1	-1.12228	3.85603	0.000250068	0.00166433	21.296	18.511	15.29	9.535	7.889	7.888
Nitab4.5_0000436g0160.1	-1.12276	3.98326	0.000514878	0.00310831	23.591	23.8	13.608	9.583	8.908	9.355
Nitab4.5_0004042g0010.1	-1.12296	4.16935	0.00313396	0.0147084	26.014	26.87	18.284	9.559	16.752	5.12
Nitab4.5_0003466g0070.1	-1.12368	5.51934	4.97076e-05	0.000400554	55.011	58.643	78.484	38.199	20.472	29.354
Nitab4.5_0001003g0020.1	-1.12371	3.98318	0.000105758	0.000783063	22.581	22.661	16.452	7.044	9.749	11.092
[truncated: 1,357 more rows]

## Sheet: HD 24 h vs RBS89 24 h
Supplementary Table S2. Differentially expressed genes were identified in this study.
Gene	logFC	logCPM	PValue	FDR	HD_24h_1	HD_24h_2	HD_24h_3	Yunyan300_24h_1	Yunyan300_24h_2	Yunyan300_24h_3
Nitab4.5_0002728g0040.1	8.90341	4.5498	7.25424e-28	5.61966e-24	0.102	0.057	0	50.442	50.367	26.062
Nitab4.5_0004107g0030.1	8.76626	4.42089	8.37131e-28	5.61966e-24	0	0	0	35.754	27.418	50.908
Nitab4.5_0002793g0010.1	8.63505	4.29812	1.65788e-18	3.70979e-15	0	0	0	40.52	47.072	17.017
Nitab4.5_0002352g0110.1	7.76304	3.51247	0.000449829	0.0402101	0	0	0	27.975	0	29.359
Nitab4.5_0002793g0070.1	7.59841	3.36514	1.38243e-12	1.16003e-09	0	0	0	20.617	22.84	7.919
Nitab4.5_0006302g0010.1	7.1795	3.01129	1.15306e-12	1.00963e-09	0	0	0	14.002	16.449	7.324
Nitab4.5_0001231g0040.1	7.12408	2.96594	9.40728e-10	5.41295e-07	0	0	0	15.098	16.799	4.784
Nitab4.5_0000928g0030.1	6.97712	2.84651	2.93992e-11	2.11454e-08	0	0	0	7.74	8.905	16.026
Nitab4.5_0002793g0060.1	6.44749	4.00402	2.68748e-19	6.76539e-16	0.437	0	0	32.232	35.301	16.315
Nitab4.5_0000159g0130.1	6.21584	2.27192	1.49865e-08	7.36129e-06	0.13	0.229	0	8.063	7.233	4.531
Nitab4.5_0000798g0030.1	6.10636	2.19597	5.98963e-08	2.3652e-05	0.158	0.267	0.039	6.722	8.084	3.549
Nitab4.5_0001438g0090.1	5.99001	2.11606	2.90023e-06	0.000703709	0	0.353	0	2.984	8.655	5.234
Nitab4.5_0002793g0050.1	5.8588	2.03046	9.56938e-07	0.000267664	0.13	0.191	0.203	5.724	6.672	3.018
Nitab4.5_0002372g0010.1	5.49481	3.86299	7.92289e-18	1.45054e-14	0	0	1.162	20.685	34.79	18.801
Nitab4.5_0002537g0030.1	5.38329	1.74025	6.11395e-05	0.00954488	0	0	0	4.648	3.516	2.622
Nitab4.5_0001231g0050.1	5.38307	1.73997	6.96916e-05	0.0105528	0	0.277	0	5.812	2.504	2.495
Nitab4.5_0006318g0040.1	5.28622	1.686	0.000122251	0.0153876	0	0	0	2.006	4.558	3.522
Nitab4.5_0000223g0020.1	5.28622	1.68568	0.000122251	0.0153876	0	0	0	4.11	3.566	2.09
Nitab4.5_0000198g0010.1	5.06997	1.57014	0.000488806	0.0429872	0	0	0	3.033	3.346	2
Nitab4.5_0000202g0480.1	5.06997	1.57	0.000488806	0.0429872	0	0	0	3.934	2.955	1.91
Nitab4.5_0000223g0050.1	4.00664	4.36879	1.8095e-16	2.42944e-13	2.481	1.746	1.84	36.195	46.651	21.062
Nitab4.5_0001231g0010.1	3.41208	6.27994	3.04047e-21	8.74742e-18	7.572	10.313	19.114	147.636	157.393	95.176
Nitab4.5_0001210g0030.1	3.2836	2.15576	3.5994e-05	0.00599078	0	0	1.443	5.196	7.102	3.856
Nitab4.5_0000798g0140.1	3.15487	4.30424	4.02665e-14	4.77015e-11	3.819	4.656	1.849	42.907	29.141	22.846
Nitab4.5_0000571g0030.1	2.84533	7.05107	9.68464e-36	1.95039e-31	31.515	25.788	34.848	216.131	191.142	251.016
Nitab4.5_0001735g0040.1	2.84096	2.23411	8.82523e-05	0.0125729	0.39	0.572	0.358	4.11	7.413	5.18
Nitab4.5_0000008g0240.1	2.71432	3.66201	3.09986e-13	2.97277e-10	2.62	3.062	2.74	17.633	20.395	17.801
Nitab4.5_0000160g0130.1	2.59541	2.57114	1.29828e-05	0.00256335	0.92	1.994	0.978	9.032	6.712	6.315
Nitab4.5_0004716g0040.1	2.46726	2.84493	1.08026e-06	0.000298017	1.041	1.546	2.605	7.671	12.221	8.126
Nitab4.5_0001553g0050.1	2.44336	5.03295	3.76509e-12	3.03301e-09	6.114	11.658	9.828	35.617	49.406	66.456
Nitab4.5_0002817g0010.1	2.43137	5.27666	4.45049e-14	4.97936e-11	11.512	12.822	9.305	44.316	80.239	56.43
Nitab4.5_0000641g0050.1	2.34491	2.41238	0.000192866	0.0215785	1.291	1.078	0.852	6.664	6.581	5.594
Nitab4.5_0002793g0040.1	2.32313	5.61042	1.37084e-13	1.45302e-10	18.313	9.082	17.932	71.45	95.746	60.033
Nitab4.5_0002918g0030.1	2.20462	2.51024	0.000308907	0.0307985	1.552	3.005	0.281	5.049	9.216	5.811
Nitab4.5_0000008g0430.1	2.01705	3.90827	6.33828e-11	4.11763e-08	4.878	6.316	4.435	18.259	21.688	22.035
Nitab4.5_0000172g2190.1	1.96529	3.30918	0.000434532	0.0395974	5.76	1.441	2.43	16.312	6.351	15.423
Nitab4.5_0001600g0100.1	1.79729	5.08991	2.09969e-17	3.52381e-14	13.212	14.044	14.505	47.565	54.635	43.692
Nitab4.5_0000223g0340.1	1.73666	6.10109	1.13484e-09	6.34851e-07	24.101	31.779	32.427	121.666	107.086	67.601
Nitab4.5_0000715g0170.1	1.70944	3.13609	0.000167088	0.0195639	2.982	3.358	3.205	11.214	6.782	14.098
Nitab4.5_0000223g0060.1	1.688	2.84406	0.000347745	0.0335083	2.081	2.671	2.643	9.306	10.228	5.432
Nitab4.5_0000381g0020.1	1.66486	5.26331	7.71112e-17	1.10924e-13	17.198	15.971	17.4	52.203	60.074	49.295
Nitab4.5_0001408g0050.1	1.62697	4.07635	3.1928e-06	0.000765473	5.119	9.626	7.01	19.912	29.571	17.342
Nitab4.5_0003295g0070.1	1.61101	4.73163	2.65886e-13	2.67734e-10	11.707	12.145	12.307	34.972	36.864	35.953
Nitab4.5_0002401g0040.1	1.60642	3.88362	1.80681e-05	0.00327814	6.662	7.041	5.238	17.544	27.017	13.549
Nitab4.5_0002728g0030.1	1.59887	3.61714	3.35694e-06	0.000795358	4.543	5.848	5.49	13.758	20.746	12.855
Nitab4.5_0001326g0030.1	1.59377	4.9846	5.84548e-08	2.35444e-05	8.65	20.655	13.653	39.962	39.949	50.079
Nitab4.5_0000798g0050.1	1.55393	3.89506	1.95306e-07	7.02367e-05	5.138	8.348	6.226	17.809	23.31	16.648
Nitab4.5_0001668g0120.1	1.54839	4.99603	1.19762e-09	6.51859e-07	11.447	15.351	17.613	35.725	43.245	51.061
Nitab4.5_0002227g0060.1	1.53187	4.98512	4.31013e-07	0.000142298	12.413	18.814	13.546	42.291	55.426	31.332
Nitab4.5_0000198g0230.1	1.51052	5.70969	1.92505e-11	1.43587e-08	19.939	33.563	22.725	70.129	78.436	67.024
Nitab4.5_0000153g0190.1	1.50521	4.32922	2.087e-06	0.000525376	6.782	10.113	10.486	18.523	32.677	27.611
Nitab4.5_0000041g0370.1	1.49546	5.42981	1.91914e-07	7.02367e-05	13.091	30.329	19.239	55.461	61.066	59.736
Nitab4.5_0003603g0090.1	1.48514	4.9333	5.27835e-07	0.000168731	17.216	16.658	10.554	38.201	32.817	51.854
Nitab4.5_0000016g0530.1	1.45844	3.34466	0.000113266	0.0148121	4.172	5.438	3.728	11.223	15.066	9.846
Nitab4.5_0001318g0070.1	1.42495	3.44615	4.41514e-05	0.00705687	3.01	6.697	4.58	12.31	14.555	12.999
Nitab4.5_0000006g0560.1	1.42316	3.11552	0.000587835	0.0480683	2.629	4.226	3.902	8.572	10.047	11.531
Nitab4.5_0001780g0140.1	1.34373	5.32635	1.37478e-11	1.06487e-08	24.844	21.743	16.141	56.557	51.82	50.772
Nitab4.5_0001032g0020.1	1.29956	4.05398	2.85003e-06	0.00069996	6.374	11.2	7.64	18.366	24.112	19.188
Nitab4.5_0002313g0070.1	1.29167	5.07243	0.000144354	0.0177265	16.724	16.495	19.559	40.803	62.579	27.846
Nitab4.5_0002951g0020.1	1.26238	5.42984	9.82213e-08	3.66311e-05	21.137	27.782	21.418	48.592	68.839	51.268
Nitab4.5_0002353g0090.1	1.22242	3.58637	0.00018868	0.0213723	3.419	9.874	4.812	14.315	13.904	13.999
Nitab4.5_0000435g0080.1	1.22132	6.05619	7.58643e-08	2.8827e-05	39.236	34.45	38.063	104.934	68.499	86.42
Nitab4.5_0004666g0020.1	1.21447	4.87026	1.26454e-05	0.00254665	14.503	16.19	17.806	49.062	30.994	31.566
Nitab4.5_0001279g0030.1	1.20924	3.47802	0.000380969	0.0353564	3.958	5.2	7.398	11.654	13.393	14.396
Nitab4.5_0003039g0030.1	1.19869	5.38598	5.44676e-11	3.65641e-08	20.004	23.622	26.637	54.551	55.797	51.421
Nitab4.5_0000302g0140.1	1.18889	7.59818	0.000223698	0.0242207	96.98	112.558	125.981	301.25	317.912	146.111
Nitab4.5_0002521g0030.1	1.17766	4.32741	1.81616e-06	0.000468919	9.783	11.926	11.183	25.627	22.118	26.323
Nitab4.5_0002728g0140.1	1.16875	3.60137	0.000320017	0.0315922	5.751	7.041	5.994	14.1	16.699	11.459
Nitab4.5_0002887g0060.1	1.16754	7.74566	3.74919e-05	0.00618894	88.135	171.356	117.238	313.09	299.92	231.278
Nitab4.5_0003913g0040.1	1.14424	3.58649	0.000451213	0.0402101	4.701	8.272	5.684	12.72	14.766	14.45
Nitab4.5_0000856g0110.1	1.13728	5.67702	6.29202e-07	0.000191992	26.387	39.373	22.87	61.411	66.055	67.673
Nitab4.5_0001986g0130.1	1.12407	4.48133	6.70423e-05	0.0103066	16.064	12.279	9.169	22.75	33.668	25.792
Nitab4.5_0003307g0040.1	1.11569	6.96379	1.57986e-10	9.64143e-08	71.448	81.284	70.451	149.994	177.228	155.858
Nitab4.5_0000255g0340.1	1.11197	5.28392	0.000147192	0.0179655	15.767	25.301	27.615	35.754	56.829	53.853
Nitab4.5_0000817g0020.1	1.10862	6.32671	8.31911e-05	0.0121405	35.668	65.505	42.342	83.28	110.301	114.211
Nitab4.5_0006493g0020.1	1.10079	5.52395	0.000141108	0.0176508	18.526	33.048	29.59	54.316	46.39	72.808
Nitab4.5_0003408g0110.1	1.09013	7.99602	1.2367e-06	0.00033208	128.551	190.751	146.266	284.89	325.605	375.524
Nitab4.5_0003603g0120.1	1.08268	5.74009	0.000228265	0.024583	41.485	33.993	20.76	56.342	65.293	80.564
Nitab4.5_0002824g0030.1	1.08261	7.87548	4.43365e-09	2.28947e-06	122.688	135.398	170.395	296.26	307.614	301.509
Nitab4.5_0000287g0050.1	1.06097	4.64685	0.000423518	0.0389462	12.441	16.887	14.369	25.646	41.722	24.422
Nitab4.5_0004599g0070.1	1.04058	7.51814	1.94539e-08	8.70627e-06	116.909	112.711	111.467	229.448	202.732	266.817
Nitab4.5_0000152g0350.1	1.03336	9.22228	1.52368e-09	8.07511e-07	376.826	402.091	341.575	683.207	837.293	765.038
Nitab4.5_0002231g0020.1	1.01381	5.46889	6.57952e-07	0.000197768	21.695	30.415	28.612	48.171	59.423	56.781
Nitab4.5_0000024g0260.1	1.01046	6.05651	6.92802e-07	0.000205181	36.728	49.305	37.607	77.047	94.985	76.537
Nitab4.5_0002456g0150.1	1.00981	4.86972	0.000142725	0.0177265	13.695	22.325	16.896	44.336	31.114	30.449
Nitab4.5_0002239g0020.1	1.00883	7.41601	0.000192495	0.0215785	96.153	140.368	86.021	168.272	253.159	224.639
Nitab4.5_0002435g0030.1	1.00748	6.45915	0.000439178	0.0398405	44.82	72.917	47.145	81.548	127.832	120.571
Nitab4.5_0007561g0010.1	-1.01825	4.25676	7.04561e-05	0.0105889	22.689	23.355	21.37	10.979	12.381	10.261
Nitab4.5_0000303g0270.1	-1.0408	4.14975	0.000117627	0.015228	17.486	24.691	20.024	13.073	7.884	9.441
Nitab4.5_0000319g0200.1	-1.04469	4.81784	4.11585e-07	0.000142298	31.441	33.84	37.23	17.114	16.128	16.414
Nitab4.5_0000171g0340.1	-1.05077	4.74055	1.56929e-05	0.00289944	34.972	26.618	35.99	18.709	11.981	16.261
Nitab4.5_0001913g0160.1	-1.05161	5.00723	0.000105642	0.0142412	40.843	42.293	35.032	20.01	11.4	24.684
Nitab4.5_0002196g0060.1	-1.0621	6.90274	0.000277073	0.0285989	107.683	191.266	158.234	55.823	90.697	71.835
Nitab4.5_0002367g0080.1	-1.06458	5.22639	7.34245e-08	2.84365e-05	41.652	51.108	45.828	19.169	23.881	23.053
Nitab4.5_0001591g0020.1	-1.07852	4.10935	0.000591933	0.0480683	22.921	14.587	24.061	11.028	6.571	11.441
Nitab4.5_0000978g0190.1	-1.13012	3.68221	0.000513955	0.0440449	18.22	13.089	13.004	6.302	5.94	8.135
Nitab4.5_0000274g0220.1	-1.15346	4.08871	0.000294439	0.0299641	22.679	19.93	18.203	14.071	4.748	7.874
Nitab4.5_0000489g0120.1	-1.17231	5.39802	3.10297e-05	0.00525133	70.175	50.631	40.561	25.891	19.724	25.296
Nitab4.5_0001940g0010.1	-1.18385	4.10917	1.18946e-05	0.00241965	20.189	23.069	19.685	9.883	5.61	11.234
Nitab4.5_0000588g0230.1	-1.20059	7.09934	3.90881e-05	0.00634835	159.797	139.242	242.376	81.705	93.803	58.853
Nitab4.5_0000707g0170.1	-1.20139	4.63782	4.24365e-07	0.000142298	30.698	36.626	25.969	12.936	13.123	14.486
Nitab4.5_0000037g0350.1	-1.24934	12.1755	8.80624e-06	0.00186683	6845.95	7257.09	4543.34	3392.2	2364.47	2074.27
Nitab4.5_0000428g0040.1	-1.26057	7.52093	5.23304e-07	0.000168731	199.813	227.615	308.809	124.328	97.689	83.78
Nitab4.5_0000210g0160.1	-1.26906	3.72173	0.000230591	0.0247014	17.885	11.181	18.591	8.288	5.259	5.675
Nitab4.5_0001455g0050.1	-1.28999	4.46137	0.000159529	0.018788	23.934	21.17	37.859	12.31	13.844	8
Nitab4.5_0001953g0110.1	-1.31831	8.38327	6.01816e-07	0.000189375	367.916	366.076	624.59	177.353	188.176	177.334
Nitab4.5_0000495g0040.1	-1.3202	5.9317	0.000103278	0.0141491	118.554	72.183	52.741	35.471	30.062	31.044
Nitab4.5_0001505g0030.1	-1.37202	3.63795	0.000144168	0.0177265	15.451	11.534	17.574	9.628	3.226	4.901
Nitab4.5_0000084g0050.1	-1.37286	3.47225	0.000150897	0.0183067	12.682	12.717	14.456	6.292	4.217	4.486
Nitab4.5_0000283g0480.1	-1.45668	4.02288	1.50226e-05	0.00285415	18.601	16.209	27.044	6.536	7.443	8.315
Nitab4.5_0000014g0430.1	-1.47414	4.33697	1.74643e-08	8.27322e-06	29.62	25.54	23.51	10.842	5.79	11.027
Nitab4.5_0002367g0010.1	-1.53884	4.98373	0.00010924	0.0145694	44.411	51.509	32.253	15.098	6.912	21.801
Nitab4.5_0001650g0130.1	-1.59528	3.7861	3.78883e-05	0.00620352	12.812	22.334	17.971	8.777	5.61	2.549
Nitab4.5_0000750g0050.1	-1.61792	4.40333	6.03699e-06	0.00133603	27.046	18.852	39.157	8.112	10.188	9.459
Nitab4.5_0003285g0040.1	-1.77323	3.15018	3.25456e-05	0.00546197	8.975	12.364	10.777	3.562	0	5.729
Nitab4.5_0000875g0060.1	-1.80426	3.7606	3.98938e-08	1.63963e-05	17.644	17.755	17.497	6.673	4.708	4.297
Nitab4.5_0000309g0100.1	-1.89331	2.53626	0.000510046	0.0440449	5.407	7.146	6.962	0.978	2.494	1.919
Nitab4.5_0000073g0340.1	-1.93415	4.27243	1.383e-10	8.70381e-08	24.603	30.453	25.281	5.157	4.708	11.216
Nitab4.5_0002787g0010.1	-2.04501	4.91094	8.86512e-05	0.0125729	48.239	26.227	56.595	17.721	3.706	9.982
Nitab4.5_0000309g0200.1	-2.19915	8.11465	0.000195744	0.0216798	342.143	632.969	321.067	38.533	176.396	65.88
Nitab4.5_0005160g0010.1	-2.31082	4.64818	2.79892e-17	4.33595e-14	40.593	29.814	41.616	7.564	7.062	7.189
Nitab4.5_0000258g0230.1	-2.36497	3.24635	2.02774e-08	8.87754e-06	13.658	9.769	15.115	2.515	1.933	1.847
Nitab4.5_0000127g0110.1	-2.49515	2.56647	1.29828e-05	0.00256335	8.604	5.486	7.243	0	0	3.721
Nitab4.5_0001574g0130.1	-2.72897	5.84575	3.64707e-08	1.53017e-05	101.077	56.641	120.965	22.564	6.01	12.522
Nitab4.5_0001361g0120.1	-2.80273	2.26626	7.96578e-05	0.0117097	2.536	7.27	6.768	0.431	0	1.144
Nitab4.5_0000422g0060.1	-2.834	3.82356	2.83653e-14	3.57031e-11	24.324	20.588	18.678	6.585	1.202	0.477
Nitab4.5_0000907g0080.1	-2.89297	6.70745	0.000188901	0.0213723	245.293	101.405	172.322	33.21	3.115	33.53
Nitab4.5_0002762g0010.1	-2.95322	5.33579	0.00036304	0.0341648	45.963	132.841	17.952	14.149	7.122	3.216
Nitab4.5_0002147g0020.1	-3.05315	2.06993	0.000121422	0.0153876	6.662	4.56	2.411	1.292	0.04	0.297
Nitab4.5_0000875g0090.1	-3.09002	3.91831	2.85822e-18	5.75618e-15	19.437	23.212	27.324	3.415	2.254	2.099
Nitab4.5_0000062g0220.1	-3.15633	2.78818	3.13856e-08	1.34484e-05	9.746	11	7.097	1.712	0.531	0.784
Nitab4.5_0000590g0010.1	-3.52946	1.83974	0.000275131	0.0285612	2.685	3.043	5.267	0	0.601	0
Nitab4.5_0000266g0110.1	-3.52946	1.83984	0.000275131	0.0285612	3.252	2.08	5.781	0	0	0.964
Nitab4.5_0000805g0060.1	-3.62667	2.4396	2.64811e-06	0.000658398	5.157	5.419	10.254	0	1.763	0
Nitab4.5_0003374g0040.1	-3.78445	6.26558	1.08649e-12	9.94583e-10	114.447	64.732	222.169	7.711	10.518	10.333
Nitab4.5_0000714g0090.1	-3.86578	3.99826	1.30269e-24	6.55874e-21	25.523	24.385	27.373	1.556	2.925	0.468
Nitab4.5_0000037g0360.1	-4.02739	8.90356	2.69501e-22	1.0855e-18	612.475	1154.74	809.044	32.604	77.224	47.088
Nitab4.5_0001940g0050.1	-4.14454	4.23617	0.000451238	0.0402101	19.474	12.899	60.904	5.352	0	0
Nitab4.5_0004247g0010.1	-5.01929	1.56746	0.000488806	0.0429872	2.862	2.585	2.45	0.078	0.25	0
Nitab4.5_0000132g0330.1	-5.23531	1.6826	0.000122251	0.0153876	3.14	3.206	3.718	0	0	0
Nitab4.5_0000060g0060.1	-5.50864	1.83983	1.52926e-05	0.00287829	2.657	5.448	3.147	0	0	0
Nitab4.5_0001079g0130.1	-5.66577	1.93576	3.82533e-06	0.000885497	4.153	3.539	5.655	0.078	0.04	0.261
Nitab4.5_0004841g0050.1	-5.80745	2.02586	9.56938e-07	0.000267664	3.438	6.993	4.067	0	0	0
Nitab4.5_0000438g0170.1	-5.80745	2.02657	9.56938e-07	0.000267664	6.885	3.492	4.067	0	0	0
Nitab4.5_0001276g0020.1	-6.15839	2.26536	7.44494e-06	0.00159504	5.129	2.748	10.777	0	0	0
Nitab4.5_0001276g0030.1	-6.21603	2.30214	7.49654e-09	3.77432e-06	3.949	7.222	8.056	0	0	0
Nitab4.5_0000999g0080.1	-7.47242	3.2844	4.90346e-11	3.4052e-08	26.535	10.905	9.431	0	0	0
Nitab4.5_0000131g0190.1	-8.57916	4.27569	5.26305e-22	1.76654e-18	20.877	46.29	34.432	0	0	0
Nitab4.5_0000062g0140.1	-8.73627	4.40859	0.000613531	0.0492267	76.233	36.559	0	0	0	0

## Sheet: HD 48 h vs RBS89 48 h
Supplementary Table S2. Differentially expressed genes were identified in this study.
Gene	logFC	logCPM	PValue	FDR	HD_48h_1	HD_48h_2	HD_48h_3	Yunyan300_48h_1	Yunyan300_48h_2	Yunyan300_48h_3
Nitab4.5_0000647g0070.1	12.1999	7.72267	3.22271e-71	6.48956e-67	0	0	0	541.397	322.864	375.135
Nitab4.5_0001802g0130.1	11.0105	6.54791	7.20553e-17	1.66779e-14	0	0	0	288.747	208.014	47.82
Nitab4.5_0000043g0210.1	10.1058	5.66752	5.94754e-18	1.57586e-15	0	0	0	87.854	163.941	38.07
Nitab4.5_0000540g0040.1	9.67789	5.26192	0.00059157	0.00790474	0	0	0	0	121.072	93.788
Nitab4.5_0000212g0330.1	8.87135	4.49588	1.00533e-42	6.74809e-39	0	0	0	36.097	40.36	46.89
Nitab4.5_0002728g0040.1	8.87011	4.49359	3.79143e-27	3.31948e-24	0.063	0.06	0	52.33	43.979	27.122
Nitab4.5_0002793g0010.1	8.56977	4.2161	5.45917e-25	3.80056e-22	0	0.139	0	38.67	39.176	21.731
Nitab4.5_0002372g0010.1	8.46383	4.12074	1.72893e-37	4.97364e-34	0	0	0	28.951	35.743	28.136
Nitab4.5_0000411g0030.1	8.20453	3.87659	0.000826321	0.0104258	0	0	0	36.864	40.603	0
Nitab4.5_0002793g0060.1	8.08446	3.77672	3.0193e-19	9.49993e-17	0.286	0	0.341	22.971	32.721	16.035
Nitab4.5_0001087g0010.1	8.0685	3.75632	6.84827e-09	3.74738e-07	0	0	0	39.747	25.222	5.594
Nitab4.5_0001803g0090.1	8.03955	3.73667	3.41425e-30	4.29705e-27	0	0	0	20.01	22.442	26.007
Nitab4.5_0000818g0010.1	7.90138	3.61768	3.27386e-16	6.79647e-14	0	0	0	12.097	24.121	27.085
Nitab4.5_0002793g0070.1	7.74969	3.4801	4.44756e-15	7.22262e-13	0	0	0	25.068	21.052	10.349
Nitab4.5_0004097g0060.1	7.72866	3.46305	2.36595e-07	8.99079e-06	0	0	0	7.019	39.428	9.16
Nitab4.5_0001231g0040.1	7.28167	3.08228	4.93985e-12	5.02393e-10	0	0	0	12.99	19.737	7.999
Nitab4.5_0006948g0010.1	7.20674	3.0346	0.00185052	0.0201163	0	0	0	0	11.799	27.177
Nitab4.5_0004300g0220.1	7.17054	2.99682	0.00152012	0.0171009	0	0	0	0	23.599	13.584
Nitab4.5_0001440g0050.1	7.04503	2.88886	1.8121e-15	3.17307e-13	0	0	0	11.379	9.813	13.575
Nitab4.5_0000125g0430.1	7.03733	2.88699	7.77745e-10	5.51459e-08	0	0	0	7.35	8.208	18.588
Nitab4.5_0000159g0130.1	6.83796	2.72246	1.056e-09	7.0647e-08	0.317	0	0.093	10.485	14.318	5.382
Nitab4.5_0000011g0100.1	6.81016	2.69775	6.78258e-08	2.93722e-06	0	0	0	15.369	10.27	3.861
Nitab4.5_0006302g0010.1	6.80107	2.69551	1.18377e-12	1.3317e-10	0	0	0.259	8.456	13.236	7.548
Nitab4.5_0006949g0030.1	6.73283	2.64248	1.84221e-12	2.04954e-10	0.053	0.05	0	9.311	10.997	7.843
Nitab4.5_0001357g0180.1	6.72892	2.64135	0.00312855	0.0302883	0	0	0	0	20.614	7.05
Nitab4.5_0002193g0050.1	6.65355	2.58471	4.30678e-08	1.96212e-06	0	0	0	5.544	6.212	14.183
Nitab4.5_0002284g0060.1	6.51465	2.47182	1.59781e-06	4.86763e-05	0	0	0	8.99	12.434	2.792
Nitab4.5_0000798g0030.1	6.37909	2.37602	9.38394e-10	6.43034e-08	0.233	0.04	0.093	7.175	9.803	5.428
Nitab4.5_0006949g0020.1	6.33383	2.34173	1.87587e-09	1.16229e-07	0.074	0	0	5.252	6.884	8.626
Nitab4.5_0002826g0120.1	6.31238	2.33892	0.00401966	0.0370452	0	0	0	0	6.212	14.183
Nitab4.5_0000173g0170.1	6.29039	2.30925	0.0029566	0.0289131	0	0	0	12.437	0	7.981
Nitab4.5_0004203g0070.1	6.26332	2.30491	0.00542291	0.0466386	0	0	0	0	4.524	15.39
Nitab4.5_0000184g0030.1	6.10488	2.16836	0.00565151	0.0480188	0	0	0	13.408	5	0
Nitab4.5_0000101g0310.1	5.96981	2.0874	2.39402e-07	9.07879e-06	0	0	0	6.204	3.283	6.313
Nitab4.5_0002728g0120.1	5.91102	2.0483	1.30619e-06	4.03415e-05	0	0	0	6.01	7.145	2.617
Nitab4.5_0002793g0050.1	5.71137	1.91869	3.82533e-06	0.00010312	0.19	0.069	0.217	3.641	6.007	4
Nitab4.5_0001231g0110.1	5.49613	1.77902	0.00582675	0.049217	0	0	0	5.689	6.138	0
Nitab4.5_0000223g0020.1	5.39631	1.72731	3.05772e-05	0.000641389	0	0	0	3.748	4.692	2.534
Nitab4.5_0000202g0480.1	5.39631	1.72731	3.05772e-05	0.000641389	0.074	0	0	4.621	2.836	3.428
Nitab4.5_0004063g0030.1	5.39631	1.72638	3.05772e-05	0.000641389	0	0	0	1.961	4.319	4.829
Nitab4.5_0002650g0110.1	5.30523	1.67388	6.61734e-05	0.00124871	0	0	0	2.252	2.49	5.576
Nitab4.5_0002728g0090.1	5.20855	1.62081	0.000122251	0.00210408	0	0	0	3.33	3.115	2.433
Nitab4.5_0002859g0040.1	5.20855	1.62069	0.000122251	0.00210408	0	0	0	3.845	2.061	3.401
Nitab4.5_0002688g0030.1	5.20637	1.61963	0.000225863	0.00354222	0	0	0	2.175	2.341	5.179
Nitab4.5_0000503g0060.1	5.20065	1.61927	0.00138152	0.0158426	0	0	0	1.631	1.782	5.953
Nitab4.5_0000060g0060.1	5.10464	1.56408	0.000244451	0.00377782	0	0	0	2.612	2.901	3.262
Nitab4.5_0000498g0070.1	5.10463	1.56385	0.000244451	0.00377782	0	0	0	1.311	4.272	3.161
Nitab4.5_0000223g0010.1	4.99265	1.50624	0.000488806	0.00676966	0	0	0	3.592	3.153	1.548
Nitab4.5_0000138g0030.1	4.87123	1.44494	0.000977437	0.0118831	0	0	0	2.583	3.656	1.005
Nitab4.5_0000904g0140.1	4.87123	1.44494	0.000977437	0.0118831	0	0	0	4.136	1.073	1.76
Nitab4.5_0000575g0270.1	4.87123	1.44422	0.000977437	0.0118831	0	0	0	2.913	1.586	3.511
Nitab4.5_0000154g0070.1	4.87123	1.44373	0.000977437	0.0118831	0	0	0	1.631	1.782	3.972
Nitab4.5_0000058g0240.1	4.73865	1.3803	0.00195456	0.0209244	0	0.268	0.3	3.116	0.457	3.179
Nitab4.5_0000254g0030.1	4.73865	1.37994	0.00195456	0.0209244	0	0	0	0.505	2.574	3.336
Nitab4.5_0002347g0190.1	4.71996	2.59059	6.91784e-05	0.00129225	0.635	0.238	0	14.835	9.272	1.889
Nitab4.5_0003774g0050.1	4.59264	1.31365	0.00390854	0.0362535	0	0	0	1.379	3.003	1.668
Nitab4.5_0002209g0210.1	4.59264	1.31341	0.00390854	0.0362535	0	0	0	1.417	1.968	2.673
Nitab4.5_0000441g0090.1	4.59263	1.31316	0.00390854	0.0362535	0.349	0.179	0	1.447	1.287	3.355
Nitab4.5_0000223g0050.1	4.48078	4.08695	1.47251e-14	2.18029e-12	0.995	1.617	1.697	41.223	29.578	17.298
Nitab4.5_0000149g0170.1	4.38691	2.34644	0.00382277	0.0357543	1.005	0	0.3	16.32	2.92	1.207
Nitab4.5_0000166g0010.1	4.06743	8.42746	0.00417971	0.0381882	67.881	0	45.384	1008.12	339.495	567.486
Nitab4.5_0001231g0010.1	4.06032	6.70856	1.35446e-09	8.68621e-08	9.408	15.552	8.526	320.912	193.118	60.824
Nitab4.5_0000160g0130.1	3.9345	2.04904	9.53116e-05	0.00170452	0.847	0	0	8.33	3.106	3.198
Nitab4.5_0000798g0140.1	3.84614	4.27327	5.65896e-12	5.69773e-10	2.117	1.984	2.328	50.485	27.516	20.146
Nitab4.5_0001772g0020.1	3.75573	2.50154	3.7009e-08	1.72113e-06	0.519	0.179	0.414	9.641	5.195	8.119
Nitab4.5_0003162g0030.1	3.64742	1.87296	0.000145244	0.00243934	0.296	0.912	0	3.282	3.6	5.557
Nitab4.5_0003295g0020.1	3.56675	1.82618	0.000275131	0.00416565	0.222	0.268	0.404	2.476	4.244	4.543
Nitab4.5_0001210g0030.1	3.33836	2.59128	0.000407584	0.00578809	1.164	0.407	0	14.621	7.658	2.885
Nitab4.5_0000157g0380.1	3.29355	1.67512	0.000977815	0.0118831	1.058	0	0	2.573	2.658	3.861
Nitab4.5_0001295g0040.1	3.19981	7.45348	0.0021421	0.0225959	40.597	20.997	37.572	17.903	340.652	563.68
Nitab4.5_0002715g0010.1	3.18963	1.62092	0.00183304	0.019974	0	0.377	0	3.379	1.884	3.069
Nitab4.5_0002526g0070.1	3.15067	3.20172	0.000120013	0.00207265	1.81	1.478	1.19	20.845	17.191	3.106
Nitab4.5_0000291g0010.1	3.07588	2.41128	0.00065015	0.00853459	1.439	1.022	0	12.553	4.449	3.511
Nitab4.5_0000647g0170.1	3.07566	2.04906	0.00142165	0.0162105	0.127	0.516	0.59	4.107	8.395	2.221
Nitab4.5_0000343g0370.1	3.04146	5.41914	1.49387e-07	5.89843e-06	5.112	17.506	3.228	60.233	62.345	93.282
Nitab4.5_0000005g0470.1	2.90863	2.82365	6.20963e-08	2.72425e-06	1.228	0.843	1.697	12.349	10.13	6.543
Nitab4.5_0002728g0080.1	2.8642	2.27652	2.75449e-05	0.000587576	1.513	0.258	0.9	6.175	6.501	4.599
Nitab4.5_0000525g0270.1	2.82228	2.53032	5.12116e-05	0.000998303	2.466	1.022	0.29	4.757	5.942	11.151
Nitab4.5_0000006g0090.1	2.81427	2.24199	0.00114037	0.0135478	1.185	0.615	0.352	7.913	7.294	2.249
Nitab4.5_0000571g0030.1	2.78708	7.1763	6.09861e-25	4.09359e-22	39.772	26.293	40.045	295.029	204.189	239.212
Nitab4.5_0001951g0010.1	2.77196	1.87418	0.00131423	0.0152271	0.773	0.506	0.321	3.951	3.302	3.705
Nitab4.5_0000641g0050.1	2.70474	3.69583	1.82544e-05	0.000408432	3.524	2.222	3.125	33.039	16.333	9.326
Nitab4.5_0001701g0180.1	2.68652	1.82696	0.00131423	0.0152271	1.005	0.526	0.3	1.981	5.606	3.143
Nitab4.5_0002251g0100.1	2.59703	1.77884	0.0048519	0.0426277	0.825	0.843	0.279	5.718	1.306	3.041
Nitab4.5_0000404g0060.1	2.57063	3.79723	0.00544266	0.0467572	4.307	3.759	2.111	3.233	14.952	43.157
Nitab4.5_0000404g0030.1	2.56989	2.58822	2.19831e-05	0.000480123	1.259	0.655	1.511	5.408	6.352	11.345
Nitab4.5_0000479g0020.1	2.54765	3.0875	0.0012365	0.0145231	2.212	1.706	1.976	14.262	18.394	2.737
Nitab4.5_0002796g0050.1	2.54009	2.34325	0.000180969	0.00294617	1.111	1.23	0	3.214	5.951	8.414
Nitab4.5_0000540g0010.1	2.52984	3.55786	1.24606e-05	0.000291427	2.381	5.128	1.604	26.204	15.446	9.935
Nitab4.5_0000223g0100.1	2.49876	1.72829	0.0041855	0.0382064	0.614	0.089	0.517	3.223	2.602	3.484
Nitab4.5_0000132g0490.1	2.49876	1.72784	0.0041855	0.0382064	0.434	0.873	0	2.417	4.244	3.069
Nitab4.5_0001110g0160.1	2.49736	1.72791	0.00583813	0.0492924	1.545	0	0	3.573	1.334	4.331
Nitab4.5_0000727g0040.1	2.49206	2.04951	0.00085715	0.0107341	2.392	0.307	0	4.65	4.738	3.981
Nitab4.5_0000103g0030.1	2.41915	2.67459	0.00271622	0.0269973	1.185	1.418	1.397	15.097	6.669	2.332
Nitab4.5_0000798g0080.1	2.38566	4.03273	4.54396e-05	0.00089856	4.307	3.571	5.629	41.981	19.942	12.1
Nitab4.5_0000318g0020.1	2.37133	5.74946	5.34495e-06	0.000138353	19.674	16.911	12.489	33.913	100.448	123.518
Nitab4.5_0001781g0120.1	2.35513	4.26204	1.0487e-06	3.36806e-05	6.392	6.596	3.715	14.437	35.976	35.831
Nitab4.5_0002960g0030.1	2.34791	3.08441	2.73948e-07	1.01968e-05	1.714	2.946	2.504	9.466	13.767	11.16
Nitab4.5_0000588g0160.1	2.33923	5.48406	0.000257662	0.00395467	20.563	10.632	10.078	23.893	67.793	120.136
Nitab4.5_0000699g0050.1	2.32956	4.50681	0.000503921	0.00692186	9.525	6.923	3.591	10.932	34.204	58.188
Nitab4.5_0000465g0040.1	2.32257	3.77907	0.00311677	0.0301887	5.281	0	6.788	9.223	23.953	27.039
Nitab4.5_0001364g0020.1	2.31431	2.2044	0.000534878	0.00729238	2.455	0.843	0	4.175	5.522	5.953
Nitab4.5_0000190g0020.1	2.29198	5.59876	5.48226e-11	4.6385e-09	15.589	16.147	14.362	49.048	77.848	102.212
Nitab4.5_0006949g0010.1	2.27392	2.75002	1.54777e-05	0.000352971	1.535	1.666	2.339	9.282	8.675	7.787
Nitab4.5_0000403g0130.1	2.27263	4.79846	0.000356112	0.00518888	11.694	9.343	5.401	14.544	43.028	70.021
Nitab4.5_0002728g0050.1	2.26245	1.9209	0.00258074	0.0259972	1.027	0.595	0.435	5.175	3.834	2.424
Nitab4.5_0000929g0010.1	2.26244	1.92031	0.00443083	0.0397609	1.175	0.417	0	4.621	2.313	4.755
Nitab4.5_0000600g0060.1	2.26215	4.75003	1.08455e-05	0.000258256	8.657	8.996	7.016	22.903	30.622	69.8
Nitab4.5_0004131g0020.1	2.24114	3.53972	6.58528e-07	2.23245e-05	3.196	3.759	3.591	10.67	17.284	21.768
Nitab4.5_0000252g0040.1	2.19869	2.84601	9.33504e-06	0.000226209	1.905	2.628	0.755	7.883	7.994	11.483
Nitab4.5_0001079g0100.1	2.19105	7.00799	0.000535683	0.00729581	49.561	57.983	26.2	60.835	227.303	325.711
Nitab4.5_0005090g0030.1	2.18351	2.12807	0.00243964	0.024887	1.503	0.546	1.014	2.456	4.356	7.538
Nitab4.5_0002401g0040.1	2.17784	4.23231	8.50873e-08	3.59958e-06	5.143	6.268	6.271	26.728	38.644	17.39
Nitab4.5_0000941g0090.1	2.17736	4.47037	7.08929e-09	3.8479e-07	4.784	11.624	5.712	43.602	28.654	27.831
Nitab4.5_0002333g0040.1	2.177	1.87466	0.00443083	0.0397609	0.37	1.398	0.735	4.417	3.544	3.566
Nitab4.5_0000295g0010.1	2.177	1.87463	0.00443083	0.0397609	1.016	1.081	0	4.553	1.707	3.714
Nitab4.5_0001870g0020.1	2.177	1.87494	0.00443083	0.0397609	0.995	0.258	1.48	3.932	2.668	3.834
Nitab4.5_0001329g0110.1	2.12261	5.5254	3.83562e-07	1.38668e-05	15.991	15.344	16.597	99.243	79.135	36.107
Nitab4.5_0000828g0020.1	2.11628	2.09019	0.00260405	0.0261986	1.566	0.823	0.962	4.786	4.99	4.101
Nitab4.5_0000495g0040.1	2.11528	4.70351	0.000992205	0.0120404	9.98	11.148	5.774	70.612	13.021	34.338
Nitab4.5_0001612g0080.1	2.11444	3.35679	6.32863e-08	2.77043e-06	3.969	3.422	1.883	12.563	15.903	13.63
Nitab4.5_0000016g0530.1	2.09369	4.31933	2.51477e-07	9.50092e-06	6.466	5.792	8.019	24.796	42.599	20.404
Nitab4.5_0000600g0050.1	2.08771	4.31906	0.00127826	0.0148701	5.768	7.201	6.943	10.33	22.013	55.377
Nitab4.5_0000647g0050.1	2.07569	2.27626	0.0014038	0.0160524	2.455	0.962	0.362	2.903	6.473	6.414
Nitab4.5_0000152g0170.1	2.07474	5.19006	2.0846e-08	1.04682e-06	12.964	16.415	9.768	34.214	67.326	65.091
Nitab4.5_0000223g0060.1	2.0726	2.61925	7.06052e-05	0.00131524	1.799	1.498	2.514	9.068	8.33	4.976
Nitab4.5_0001850g0040.1	2.05985	4.34047	5.63205e-06	0.000144291	5.143	6.834	8.454	15.223	39.12	35.084
Nitab4.5_0004141g0040.1	2.05039	2.74934	0.000165228	0.00272722	3.524	1.716	1.045	6.544	7.22	10.828
Nitab4.5_0001803g0050.1	2.04373	2.049	0.00435015	0.0392821	0.667	1.448	0.559	3.476	4.561	4.645
Nitab4.5_0002227g0050.1	2.04372	2.04898	0.00435015	0.0392821	1.63	1.289	0	3.058	5.578	4.912
Nitab4.5_0000508g0110.1	2.04372	2.0491	0.00435015	0.0392821	0.783	0.873	1.262	3.845	3.535	5.069
Nitab4.5_0003129g0010.1	2.03178	4.31568	0.00204108	0.0216893	8.382	6.387	6.312	59.097	14.001	14.478
Nitab4.5_0003546g0060.1	2.02079	3.29167	7.82319e-06	0.000193295	3.196	1.785	3.984	16.34	14.057	8.405
Nitab4.5_0000014g0150.1	2.01647	2.24236	0.00151717	0.0170773	2.371	0.922	0.704	6.893	4.944	3.935
Nitab4.5_0001685g0020.1	2.0129	3.88105	0.000179558	0.00293012	5.122	4.672	5.215	29.369	25.52	8.819
Nitab4.5_0001198g0190.1	1.99748	2.41137	0.000536751	0.00729815	0.825	1.865	1.573	7.612	6.632	3.944
Nitab4.5_0001190g0020.1	1.9827	7.89226	0.00126464	0.0147886	99.884	87.202	91.927	753.979	216.427	147.138
Nitab4.5_0000342g0270.1	1.96162	3.5746	0.000405712	0.00577372	2.73	5.108	4.191	24.184	17.387	6.976
Nitab4.5_0000633g0010.1	1.96026	3.42311	1.45125e-06	4.44131e-05	3.09	4.275	3.684	19.116	12.126	11.603
Nitab4.5_0001079g0030.1	1.95343	2.20583	0.00249895	0.0253763	1.609	0.942	1.086	4.728	6.567	3.41
Nitab4.5_0000754g0180.1	1.9406	3.14232	0.000391867	0.00560841	3.937	2.747	1.966	7.583	8.6	17.676
Nitab4.5_0001190g0040.1	1.93672	11.1137	0.00223146	0.0232703	894.691	882.572	912.616	7250.03	1721.86	1447.95
Nitab4.5_0000797g0040.1	1.91484	3.21781	1.32933e-05	0.000308041	3.556	2.966	2.815	9.592	10.326	16.579
Nitab4.5_0001215g0240.1	1.89796	3.53972	0.00140705	0.0160713	5.927	3.521	3.197	9.34	10.923	26.827
Nitab4.5_0000588g0270.1	1.89778	4.12333	4.439e-05	0.000880668	7.207	6.784	5.06	39.825	18.263	16.561
Nitab4.5_0000027g0300.1	1.89775	2.89643	0.00243404	0.024884	2.529	3.045	2.183	12.233	12.228	3.143
Nitab4.5_0000667g0040.1	1.88928	2.89498	5.74247e-05	0.0010992	2.392	3.561	1.738	11.767	8.889	7.022
Nitab4.5_0002887g0090.1	1.88751	2.16813	0.00408453	0.0374527	1.619	1.508	0.414	6.184	3.498	4.709
Nitab4.5_0004905g0020.1	1.8875	2.16746	0.00408453	0.0374527	1.386	1.081	0.942	4.728	3.405	5.677
Nitab4.5_0000034g0020.1	1.8806	3.36036	0.00315678	0.0304883	2	5.782	2.98	22.262	12.779	5.64
Nitab4.5_0001227g0050.1	1.87644	3.72216	3.42423e-06	9.36871e-05	4.424	5.376	4.118	21.815	21.547	10.911
Nitab4.5_0002986g0090.1	1.87479	3.95556	1.90375e-05	0.000422665	7.99	7.042	2.142	15.049	29.065	20.063
Nitab4.5_0001480g0120.1	1.85741	3.51003	0.00219642	0.0230842	4.604	4.166	3.673	7.398	10.792	26.809
Nitab4.5_0002421g0030.1	1.84685	5.59453	2.2945e-08	1.12419e-06	21.103	18.567	20.364	46.097	92.408	77.255
Nitab4.5_0000136g0340.1	1.84039	4.63982	2.76465e-06	7.85215e-05	13.43	10.761	5.929	23.466	37.786	46.779
Nitab4.5_0001919g0180.1	1.83912	3.76047	4.02536e-06	0.000108078	7.218	2.807	4.832	25.301	15.167	15.694
Nitab4.5_0000824g0070.1	1.83862	3.25512	4.16417e-06	0.000111065	4.572	3.055	3.218	11.66	11.408	13.888
Nitab4.5_0002503g0010.1	1.83208	4.87396	1.79808e-05	0.000403938	8.848	12.2	14.466	22.757	46.563	58.179
Nitab4.5_0003711g0050.1	1.83011	2.31219	0.002321	0.0239805	1.566	2.549	0	7.175	5.625	4.101
Nitab4.5_0000008g0240.1	1.82928	3.74757	7.61236e-05	0.00140119	2.085	7.3	5.577	26.349	16.64	12.718
Nitab4.5_0000308g0060.1	1.81893	4.68598	1.1007e-06	3.49601e-05	10.53	12.418	8.061	23.116	41.498	46.687
Nitab4.5_0002632g0010.1	1.81645	5.8867	0.000360496	0.00524517	20.129	28.049	25.703	33.864	133.981	96.314
Nitab4.5_0001422g0050.1	1.79917	3.04628	3.03653e-05	0.00063894	2.434	2.747	3.425	10.961	10.932	8.995
Nitab4.5_0002778g0070.1	1.79422	3.39208	0.000919672	0.0113175	5.281	0	6.788	12.291	17.116	11.584
Nitab4.5_0001577g0030.1	1.77669	3.12506	0.000177442	0.002905	2.815	3.551	2.825	7.019	14.682	11.114
Nitab4.5_0000602g0060.1	1.77	2.70157	0.00436912	0.0393801	3.651	0.684	1.966	9.553	9.253	3.898
Nitab4.5_0000608g0090.1	1.7698	2.27771	0.00386256	0.0360595	1.249	1.894	0.869	7.33	3.628	4.636
Nitab4.5_0000813g0080.1	1.7697	2.27649	0.00372671	0.0349208	1.577	1.428	1.79	3.854	4.113	7.161
Nitab4.5_0000041g0020.1	1.75891	6.76179	0.00230468	0.0238731	54.546	45.128	43.397	48.971	168.428	269.145
Nitab4.5_0000036g0360.1	1.75625	5.38873	0.000917528	0.0113143	30.765	10.95	11.993	95.01	33.971	55.396
Nitab4.5_0000902g0190.1	1.74795	2.80054	0.00243929	0.024887	2.222	4.91	0	8	11.053	5.603
Nitab4.5_0000914g0190.1	1.74377	3.96022	0.00482159	0.0424355	4.784	7.062	6.954	25.767	31.863	6.469
Nitab4.5_0000079g0170.1	1.74263	2.79996	0.000347745	0.00508905	3.048	1.904	2.194	6.757	8.162	9.944
Nitab4.5_0001522g0080.1	1.73559	3.00566	7.3866e-05	0.00136588	5.345	1.944	1.097	12.641	9.104	8.386
Nitab4.5_0000786g0100.1	1.73545	4.85647	5.62712e-12	5.69414e-10	14.965	12.943	9.22	47.34	36.144	41.498
Nitab4.5_0002295g0070.1	1.72614	3.18057	0.00100514	0.0121565	3.334	4.433	2.535	8.097	8.264	17.851
Nitab4.5_0003434g0030.1	1.71727	7.07017	8.44138e-08	3.57861e-06	69.119	69.736	42.425	259.417	141.788	201.133
Nitab4.5_0005915g0010.1	1.70667	2.24217	0.00593517	0.0498817	1.323	1.875	0.952	5.854	5.27	4.258
Nitab4.5_0000008g0430.1	1.70628	4.28669	2.05869e-05	0.000453565	8.975	12.398	2.732	32.437	27.19	21.74
Nitab4.5_0001401g0110.1	1.69573	8.52577	6.87617e-05	0.00128685	188.169	207.779	111.639	287.058	627.977	741.755
Nitab4.5_0002728g0030.1	1.695	3.7732	7.57186e-06	0.000188473	4.741	5.584	6.333	20.524	22.414	11.529
Nitab4.5_0002219g0010.1	1.69402	12.3777	3.98831e-10	2.97454e-08	2567.98	2994.95	1808.59	6389.79	8772.76	8889.6
Nitab4.5_0005250g0030.1	1.69234	5.15156	0.000190193	0.00306393	16.34	21.602	8.444	76.961	31.938	44.715
Nitab4.5_0000934g0080.1	1.6705	4.5811	3.81574e-06	0.000102999	16.298	8.133	6.157	24.825	38.43	37.591
Nitab4.5_0000383g0070.1	1.66333	2.75151	0.0008276	0.0104289	1.831	2.539	2.877	7.913	10.083	6.175
Nitab4.5_0000359g0180.1	1.66117	3.22001	3.35948e-05	0.000694557	2.879	3.62	4.439	12.951	9.384	12.156
Nitab4.5_0002543g0010.1	1.66117	3.21928	3.35948e-05	0.000694557	3.344	4.84	2.452	12.553	9.038	13.473
Nitab4.5_0001434g0050.1	1.65575	5.15296	0.000261544	0.00400815	22.341	15.859	10.182	57.747	26.686	68.03
Nitab4.5_0001789g0090.1	1.65478	2.50441	0.00188365	0.0203493	0.709	2.331	3.032	8.505	4.692	5.88
Nitab4.5_0002793g0040.1	1.63864	5.51813	2.7774e-08	1.33163e-06	18.224	23.139	20.705	66.932	84.386	47.424
Nitab4.5_0004979g0060.1	1.6371	7.18985	6.95599e-05	0.00129817	80.443	60.264	65.717	102.641	274.547	268.555
Nitab4.5_0005935g0010.1	1.62583	3.02585	0.000510599	0.00699928	0.857	5.634	2.639	12.728	9.691	7.935
Nitab4.5_0000114g0090.1	1.62487	3.83102	4.21956e-07	1.51731e-05	6.847	6.249	5.36	16.806	16.547	23.519
Nitab4.5_0000036g0430.1	1.62181	2.72498	0.00136272	0.0156538	2.699	1.855	2.349	6.602	5.541	10.174
Nitab4.5_0001110g0090.1	1.61946	2.34621	0.00523353	0.0454381	2.032	2.281	1.076	5.99	4.468	5.29
Nitab4.5_0002515g0020.1	1.61609	3.34325	6.50429e-05	0.00123099	5.969	3.045	3.818	16.369	9.822	12.404
Nitab4.5_0000021g0120.1	1.61358	3.1069	8.90647e-05	0.00161093	2.603	4.483	2.815	10.32	12.023	8.93
Nitab4.5_0002080g0050.1	1.61265	4.76909	0.00571194	0.0484301	13.25	12.745	10.523	11.282	54.184	48.41
Nitab4.5_0002003g0070.1	1.59929	6.23753	0.000477994	0.00664277	38.258	32.165	36.082	49.66	104.114	173.302
Nitab4.5_0002629g0040.1	1.58948	6.36341	0.00433342	0.0392304	70.865	22.842	24.999	146.941	151.815	60.418
Nitab4.5_0001895g0040.1	1.58903	4.32	1.11861e-05	0.000264695	10.551	8.788	8.164	31.476	16.799	33.748
Nitab4.5_0000185g0120.1	1.57088	6.31966	0.00193902	0.0208325	55.414	35.508	24.72	61.592	91.69	191.761
Nitab4.5_0000008g0810.1	1.56996	3.57344	2.92493e-06	8.20325e-05	4.911	5.316	4.036	15.738	15.894	14.257
Nitab4.5_0000998g0060.1	1.56632	2.79916	0.00571166	0.0484301	2.593	2.648	2.204	4.854	6.902	12.156
Nitab4.5_0000716g0240.1	1.56144	4.56122	3.23363e-07	1.18392e-05	13.525	12.2	7.543	37.514	24.802	35.481
Nitab4.5_0002832g0020.1	1.54938	2.44315	0.00456191	0.0406295	1.767	1.984	1.832	6.223	5.205	6.202
Nitab4.5_0000319g0040.1	1.54729	3.29243	0.00286899	0.0282094	2.371	7.34	2.597	16.282	13.394	6.939
Nitab4.5_0000152g0350.1	1.54227	9.42407	5.92661e-09	3.2968e-07	340.101	363.725	323.669	1217.95	1118.43	687.106
Nitab4.5_0000232g0110.1	1.53886	5.92093	1.24459e-06	3.87361e-05	36.946	27.672	23.644	58.825	89.684	110.091
Nitab4.5_0002304g0070.1	1.53622	4.35467	1.91492e-05	0.000424212	15.388	7.617	4.708	29.194	23.384	30.744
Nitab4.5_0004978g0010.1	1.53553	2.6736	0.00289659	0.0284391	2.212	2.519	2.173	8.078	5.69	7.686
Nitab4.5_0001187g0040.1	1.5313	4.16733	1.89167e-05	0.000420447	8.202	8.242	7.854	15.718	24.373	31.619
Nitab4.5_0001913g0010.1	1.52767	5.5889	2.80676e-05	0.000597058	24.712	24.855	21.14	103.689	46.703	54.511
Nitab4.5_0003434g0050.1	1.52539	5.11547	0.000319907	0.00473063	19.706	18.984	10.896	74.223	31.406	40.033
Nitab4.5_0000040g0320.1	1.525	2.96094	0.00404563	0.0372316	1.45	6.457	1.8	7.01	11.799	9.474
Nitab4.5_0000227g0110.1	1.52303	4.12318	2.00868e-08	1.0163e-06	9.779	7.796	6.488	26.748	21.817	21.012
Nitab4.5_0003039g0030.1	1.52286	5.1736	2.06432e-12	2.28403e-10	17.198	16.097	19.039	46.349	48.942	55.801
Nitab4.5_0002311g0020.1	1.5209	4.72498	0.000560768	0.00756342	10.678	18.289	8.464	21.99	34.102	52.382
Nitab4.5_0004050g0020.1	1.51646	3.12645	0.000177617	0.00290551	2.932	4.483	3.311	8.932	13.105	10.091
Nitab4.5_0002315g0010.1	1.50994	3.34178	5.11282e-05	0.000997645	4.561	5.048	3.384	10.845	12.303	14.155
Nitab4.5_0000998g0010.1	1.50666	3.4703	1.71461e-05	0.000386643	3.895	5.584	5.008	15.243	13.171	13.943
Nitab4.5_0000319g0050.1	1.50277	3.6424	3.35762e-06	9.22408e-05	4.932	6.08	5.122	16.757	13.851	17.925
Nitab4.5_0003914g0120.1	1.50169	3.69691	1.95345e-06	5.81043e-05	5.599	4.761	6.364	17.816	17.219	15.151
Nitab4.5_0003481g0030.1	1.50091	3.74769	1.19492e-05	0.00028085	7.017	6.546	5.257	21.845	12.406	18.219
Nitab4.5_0000743g0100.1	1.49933	7.60124	6.99711e-07	2.35227e-05	84.644	120.349	89.444	378.524	259.707	204.635
Nitab4.5_0001540g0010.1	1.4981	3.88993	6.45233e-07	2.19477e-05	6.392	7.518	5.743	16.291	19.756	22.035
Nitab4.5_0000175g0250.1	1.49179	2.53383	0.00394342	0.0364761	1.577	2.321	2.99	4.738	7.294	6.672
Nitab4.5_0000527g0200.1	1.48947	6.15229	0.00282375	0.0278598	58.578	26.571	21.533	73.243	71.738	157.312
Nitab4.5_0000207g0390.1	1.488	2.84848	0.00140871	0.0160727	3.842	2.549	2.08	7.524	7.005	10.405
Nitab4.5_0003162g0020.1	1.483	3.51499	1.48476e-05	0.00034053	5.154	5.148	4.987	11.689	15.344	15.455
Nitab4.5_0000108g0250.1	1.48029	4.17032	2.25575e-08	1.11061e-06	8.086	9.145	7.812	24.097	24.989	22.072
Nitab4.5_0000119g0170.1	1.46815	5.03475	2.64537e-07	9.91989e-06	15.028	18.319	15.118	58.747	39.819	37.554
Nitab4.5_0000578g0170.1	1.46268	5.3769	5.27846e-06	0.000137328	20.172	19.797	22.361	36.456	71.235	64.842
Nitab4.5_0005283g0070.1	1.4568	8.13749	0.00104606	0.0125608	213.304	146.375	79.717	271.427	360.407	581.365
Nitab4.5_0001889g0160.1	1.45679	3.23741	0.00019582	0.00313952	2.318	6.764	2.877	10.592	10.792	13.197
Nitab4.5_0002184g0040.1	1.45424	3.08654	0.000396558	0.00566347	3.81	3.214	3.715	7.757	9.887	12.497
Nitab4.5_0000676g0240.1	1.45386	3.16399	0.000873665	0.0108935	5.45	3.293	2.804	7.602	10.111	14.441
Nitab4.5_0004715g0010.1	1.44103	4.21565	2.49229e-08	1.21225e-06	7.959	10.355	7.792	23.194	24.224	26.117
Nitab4.5_0001478g0110.1	1.44071	5.29483	5.90489e-06	0.000150325	19.928	18.369	20.705	76.126	44.474	42.743
Nitab4.5_0000678g0120.1	1.4365	5.09887	0.00180712	0.0197236	23.188	13.281	15.283	25.126	42.412	73.339
Nitab4.5_0003280g0030.1	1.43482	3.93323	0.00392101	0.03634	3.122	11.753	6.54	11.845	23.487	24.2
Nitab4.5_0000174g0150.1	1.42547	3.14575	0.000339017	0.0049867	2.9	4.84	3.591	8.748	11.967	10.239
Nitab4.5_0000528g0100.1	1.42362	3.74723	5.31315e-05	0.00102876	7.757	3.759	7.916	15.116	14.094	21.823
Nitab4.5_0001088g0190.1	1.42351	5.10343	0.000878767	0.0109368	20.341	15.334	16.37	55.932	63.343	22.523
Nitab4.5_0001198g0180.1	1.42109	5.17526	1.60464e-05	0.000364703	17.928	19.767	17.229	35.786	70.414	42.908
Nitab4.5_0000228g0090.1	1.41233	4.97489	2.08632e-06	6.15114e-05	18.108	19.797	10.109	35.602	51.749	41.425
Nitab4.5_0001268g0020.1	1.40665	6.33416	1.86113e-05	0.000414818	34.406	58.707	34.002	87.573	103.806	148.014
Nitab4.5_0001085g0080.1	1.4026	2.7002	0.00541742	0.0466386	2.349	3.461	2.256	8.359	5.223	7.64
Nitab4.5_0000033g0440.1	1.40138	3.63021	6.65886e-05	0.00125083	6.868	5.405	4.791	19.165	11.221	16.662
Nitab4.5_0001392g0070.1	1.40092	4.18993	7.82658e-08	3.3676e-06	9.207	8.867	8.537	26.65	24.149	21.832
Nitab4.5_0000775g0140.1	1.4005	4.8825	0.000891587	0.0110282	16.605	18.398	10.172	28.223	29.587	61.441
Nitab4.5_0001509g0050.1	1.39776	3.57534	0.000296324	0.0044464	9.229	4.394	3.27	13.883	18.776	11.98
Nitab4.5_0000479g0030.1	1.39572	3.12843	0.0028455	0.0280195	4.106	2.807	3.963	9.748	14.644	6.516
Nitab4.5_0000345g0110.1	1.39471	3.12755	0.00050027	0.00689524	4.519	5.931	1.645	12.291	10.148	8.718
Nitab4.5_0000516g0130.1	1.39134	6.66962	0.00149136	0.0168433	83.522	41.568	36.899	89.602	135.641	203.363
Nitab4.5_0000694g0150.1	1.39072	3.67299	0.00188801	0.0203745	6.233	6.467	5.939	24.243	15.325	8.866
Nitab4.5_0000132g0050.1	1.39049	3.45558	7.08491e-05	0.00131857	4.561	5.544	4.863	14.825	12.62	13.197
Nitab4.5_0001930g0030.1	1.38309	4.37767	4.48522e-05	0.000888091	11.165	9.432	10.689	19.476	25.94	36.559
Nitab4.5_0000116g0390.1	1.38299	2.96373	0.00150328	0.0169589	3.323	2.975	4.439	10.068	10.54	6.267
Nitab4.5_0005428g0050.1	1.38127	4.10223	0.000881753	0.0109446	9.493	10.236	4.956	25.913	13.208	28.219
Nitab4.5_0001408g0050.1	1.37997	3.98379	0.0047417	0.0417688	8.953	7.042	6.964	25.408	27.18	8.617
Nitab4.5_0000582g0240.1	1.37918	3.8556	0.000107719	0.00188621	6.181	9.006	5.784	12.689	22.685	20.496
Nitab4.5_0003757g0050.1	1.37519	3.2559	0.000733164	0.00947608	5.027	5.108	2.639	7.68	12.797	13.658
Nitab4.5_0001780g0120.1	1.37311	4.69858	0.000239357	0.00371622	11.874	16.246	11.703	24.291	50.91	28.873
Nitab4.5_0000622g0070.1	1.37242	3.76035	6.01045e-06	0.000152242	5.546	8.798	5.867	15.874	19.429	16.026
Nitab4.5_0002437g0020.1	1.36734	2.77668	0.00454863	0.040619	2.275	3.66	3.073	6.35	9.673	7.078
Nitab4.5_0001014g0100.1	1.36639	3.43961	0.000103625	0.00182563	4.625	5.624	4.863	11.728	14.458	13.953
Nitab4.5_0000023g0100.1	1.36402	7.71073	2.62789e-08	1.26745e-06	119.347	127.193	94.731	242.922	367.823	275.421
Nitab4.5_0000173g0030.1	1.3613	4.64115	0.000220146	0.00347148	14.954	14.887	8.661	47.281	24.14	28.661
Nitab4.5_0001514g0050.1	1.36002	4.19715	8.07075e-05	0.00147612	9.557	9.274	8.764	15.087	28.738	27.463
Nitab4.5_0000043g0320.1	1.35927	5.33262	0.000815245	0.0103249	25.463	27.087	11.299	78.145	38.812	48.014
Nitab4.5_0000017g0160.1	1.35592	4.26247	8.66579e-07	2.8467e-05	10.266	9.293	9.644	22.971	30.426	21.602
Nitab4.5_0000444g0050.1	1.35425	5.69687	0.00190571	0.0205435	23.071	13.915	45.394	55.961	69.798	87.771
Nitab4.5_0003278g0010.1	1.35424	6.02778	4.84982e-09	2.74749e-07	35.644	38.701	30.432	79.621	82.045	108.607
Nitab4.5_0000255g0290.1	1.34863	4.58274	7.87451e-05	0.00144548	13.896	11.763	10.534	33.369	20.539	41.498
Nitab4.5_0000142g0410.1	1.34682	2.94102	0.00219964	0.0230972	2.699	4.215	2.732	9.466	8.609	7.603
Nitab4.5_0000069g0480.1	1.34326	3.64293	2.56065e-05	0.000552666	6.223	5.961	6.26	13.883	14.476	18.441
Nitab4.5_0000611g0110.1	1.33826	4.17995	0.00399379	0.0368574	10.668	12.348	4.232	30.524	13.693	26.016
Nitab4.5_0003558g0010.1	1.33748	3.8232	0.00455969	0.0406295	3.863	11.228	6.043	25.369	16.435	11.501
Nitab4.5_0000931g0020.1	1.33452	4.74529	9.85935e-06	0.000237202	14.531	16.445	11.092	46.544	28.682	32.108
Nitab4.5_0000308g0220.1	1.32447	3.47026	0.000127882	0.00218977	4.953	6.328	4.201	12.466	12.527	15.676
Nitab4.5_0003738g0060.1	1.32351	4.30403	8.15489e-06	0.000200295	12.022	12.527	5.991	23.398	23.375	29.942
Nitab4.5_0001644g0110.1	1.32275	6.20635	2.18793e-06	6.37602e-05	43.37	38.463	39.031	71.388	103.564	129.711
Nitab4.5_0002322g0060.1	1.32029	5.57952	0.000575574	0.00773721	28.776	29.368	18.957	36.641	71.048	87.374
Nitab4.5_0003214g0020.1	1.31651	5.29009	0.000428736	0.00604161	29.104	22.604	11.475	68.757	39.661	50.557
Nitab4.5_0001891g0020.1	1.31496	5.1364	2.16591e-07	8.32347e-06	16.446	22.197	17.984	37.34	50.509	53.995
Nitab4.5_0000383g0030.1	1.30972	2.91883	0.00319785	0.0308406	2.191	3.69	4.449	9.165	8.861	7.916
Nitab4.5_0000256g0380.1	1.30713	5.36019	7.25671e-11	6.01352e-09	21.135	23.546	22.578	52.534	61.357	52.631
Nitab4.5_0001198g0150.1	1.3061	4.12475	0.000231785	0.00361258	7.63	9.829	9.623	22.349	29.839	15.188
Nitab4.5_0002348g0030.1	1.30608	5.15213	0.00456752	0.0406615	22.087	19.023	15.821	22.961	44.203	75.191
Nitab4.5_0000421g0040.1	1.3034	4.41225	3.98593e-08	1.83253e-06	10.869	12.388	9.396	26.981	28.132	28.09
Nitab4.5_0003234g0120.1	1.29735	6.25468	0.00154688	0.0173545	49.402	43.333	33.857	52.398	150.64	111.049
Nitab4.5_0002436g0090.1	1.29649	2.82698	0.00564903	0.048018	3.725	2.48	2.639	10.99	6.054	6.866
Nitab4.5_0001843g0040.1	1.29191	4.31489	3.05691e-06	8.53773e-05	10.541	12.596	7.647	31.476	22.974	23.168
Nitab4.5_0000664g0010.1	1.29161	3.39291	0.000315607	0.0046834	4.593	5.981	5.401	12.913	13.189	11.603
Nitab4.5_0000383g0080.1	1.29013	6.38615	2.43607e-05	0.000529182	38.269	44.107	56.59	113.844	151.423	79.983
Nitab4.5_0005820g0010.1	1.28885	3.20311	0.00404727	0.0372316	2.868	3.719	6.26	13.252	6.837	12.441
Nitab4.5_0002944g0150.1	1.28822	4.56867	9.02213e-05	0.00162649	13.822	10.732	12.665	28.65	22.377	41.932
Nitab4.5_0000063g0140.1	1.28138	3.32498	0.00496489	0.0435444	3.895	7.012	3.88	7.087	14.887	13.86
Nitab4.5_0002817g0010.1	1.27958	5.40219	6.01497e-09	3.32756e-07	25.368	17.327	26.386	55.864	62.019	52.244
Nitab4.5_0003281g0010.1	1.27897	4.24213	9.11223e-05	0.00163833	9.144	11.714	8.412	17.495	24.522	31.14
Nitab4.5_0001706g0060.1	1.27823	6.28693	6.33384e-10	4.57444e-08	44.725	48.312	37.53	117.281	111.66	91.733
Nitab4.5_0002411g0070.1	1.27589	3.44052	0.000265993	0.00406704	6.921	6.596	2.752	15.233	10.186	13.741
Nitab4.5_0003577g0010.1	1.27476	3.69746	3.85634e-05	0.000781239	6.625	7.131	5.836	18.786	12.807	16.487
Nitab4.5_0001453g0050.1	1.2745	6.50037	2.3041e-07	8.80411e-06	47	57.258	48.592	134.922	93.08	144.162
Nitab4.5_0000303g0050.1	1.27233	4.33229	0.000201585	0.00322168	9.599	10.533	11.382	22.786	35.836	18.8
Nitab4.5_0000153g0190.1	1.27173	5.20948	0.00183047	0.0199676	21.907	19.926	18.543	67.777	56.245	24.283
Nitab4.5_0000575g0230.1	1.27147	8.42296	2.08096e-14	3.0147e-12	196.297	206.549	184.123	461.718	510.404	458.132
Nitab4.5_0000050g0280.1	1.26959	4.41465	0.00343257	0.0327591	8.816	14.63	9.903	42.835	17.61	22.219
Nitab4.5_0002772g0010.1	1.26801	4.44418	0.00279197	0.0276275	8.467	12.933	13.41	18.466	43.401	22.431
Nitab4.5_0001984g0070.1	1.26537	7.23746	0.000144036	0.00242716	107.98	81.836	67.879	140.107	197.576	285.439
Nitab4.5_0000525g0240.1	1.25988	3.7348	0.000409966	0.00581372	7.493	5.257	7.667	12.524	14.905	21.417
Nitab4.5_0001079g0080.1	1.25761	3.59024	0.000111163	0.00193976	7.641	3.819	6.943	15.32	16.109	12.755
Nitab4.5_0000101g0080.1	1.24528	3.6302	9.37402e-05	0.0016794	5.969	5.366	7.057	11.515	17.461	15.501
Nitab4.5_0000625g0110.1	1.24394	4.90184	7.93894e-05	0.00145465	13.917	13.429	21.802	51.67	31.313	35.711
Nitab4.5_0001079g0120.1	1.24346	4.08346	4.25001e-06	0.000113055	8.858	11.386	6.56	20.116	20.343	23.583
Nitab4.5_0000368g0350.1	1.24171	5.17151	0.000414018	0.00585881	11.377	20.709	27.835	38.893	58.568	46.198
Nitab4.5_0000227g0140.1	1.24165	5.70889	0.000144619	0.00243494	27.358	28.158	32.595	61.505	48.811	99.834
Nitab4.5_0002786g0010.1	1.2392	4.08249	0.000460918	0.00643209	10.065	8.56	8.237	15.01	19.644	28.947
Nitab4.5_0000073g0330.1	1.23427	6.85703	1.14307e-10	9.24414e-09	77.162	57.03	65.406	149.242	163.213	161.847
Nitab4.5_0001107g0080.1	1.22831	3.16556	0.00223897	0.0233245	4.456	3.967	4.087	8.951	10.242	11.52
Nitab4.5_0000383g0140.1	1.22521	3.71246	0.000645178	0.00849147	6.36	6.189	7.574	22.126	14.057	11.713
Nitab4.5_0000017g0240.1	1.21726	4.88282	1.62889e-08	8.3463e-07	16.859	18.339	13.679	35.796	41.554	37.766
Nitab4.5_0002629g0010.1	1.21467	5.74657	2.22737e-08	1.09933e-06	34.3	27.99	29.728	66.184	65.629	84.149
Nitab4.5_0000368g0280.1	1.21359	3.56103	0.00106495	0.0127497	5.006	6.377	6.177	18.388	9.393	14.45
Nitab4.5_0007418g0010.1	1.21276	3.45623	0.00045532	0.00636279	4.286	4.186	7.802	11.913	13.684	13.787
Nitab4.5_0002906g0120.1	1.21274	3.34489	0.000920599	0.0113175	6.149	3.581	5.453	13.049	12.163	10.451
Nitab4.5_0003110g0020.1	1.21271	3.22285	0.001315	0.0152272	4.932	4.9	3.518	12.282	12.424	7.594
Nitab4.5_0002548g0010.1	1.20447	4.81022	0.00425344	0.0387038	13.748	17.456	15.159	58.796	26.052	24.929
Nitab4.5_0000383g0110.1	1.2042	3.87033	0.000151295	0.00253042	7.091	7.766	8.175	15.67	22.862	14.994
Nitab4.5_0000030g0210.1	1.20181	3.60298	0.000189759	0.00305938	6.233	6.387	6.364	13.757	15.307	15.16
Nitab4.5_0002578g0010.1	1.20106	8.06606	1.0798e-11	1.03052e-09	177.406	139.581	156.537	376.388	355.846	366.712
Nitab4.5_0001715g0090.1	1.19703	3.39163	0.0031124	0.0301754	6.117	4.731	5.184	8.592	11.837	17.04
Nitab4.5_0000101g0050.1	1.19687	3.14645	0.00223897	0.0233245	3.905	5.158	4.408	8.272	10.736	10.893
Nitab4.5_0002428g0040.1	1.1952	3.90365	6.54432e-05	0.0012374	8.551	7.022	7.616	18.252	15.307	22.311
Nitab4.5_0001210g0010.1	1.19488	3.00635	0.00457968	0.0407337	3.048	4.334	4.667	8.592	10.783	8.082
Nitab4.5_0003295g0070.1	1.19418	4.72012	4.93755e-08	2.2046e-06	16.203	16.058	11.506	35.592	34.409	32.421
Nitab4.5_0004908g0060.1	1.19222	8.1168	2.09821e-10	1.64403e-08	157.594	177.082	158.337	330.689	420.355	385.309
Nitab4.5_0000565g0120.1	1.18912	3.54586	0.000657157	0.00860974	6.699	5.237	6.188	10	16.939	14.81
Nitab4.5_0000483g0030.1	1.18604	4.2444	2.15533e-06	6.30842e-05	10.181	10.999	9.189	21.165	23.925	26.375
Nitab4.5_0004666g0020.1	1.18466	5.53576	0.000642166	0.00845736	26.712	29.16	24.741	89.835	55.275	39.646
Nitab4.5_0002257g0150.1	1.18258	3.20355	0.0026399	0.0263951	4.318	5.237	4.025	10.301	11.221	10.358
Nitab4.5_0000267g0020.1	1.18206	6.06454	1.1858e-05	0.000279608	39.348	41.012	36.475	117.66	67.522	83.098
Nitab4.5_0003331g0070.1	1.17663	4.59225	1.24724e-07	5.01311e-06	14.34	13.35	13.152	27.815	33.495	31.555
Nitab4.5_0000465g0120.1	1.17298	3.72399	0.000112331	0.00195338	6.191	7.756	6.912	16.447	16.78	14.165
Nitab4.5_0004624g0030.1	1.17278	6.33201	0.00248878	0.0253114	71.257	38.483	32.646	141.961	72.531	109.326
Nitab4.5_0002245g0100.1	1.17006	5.12467	0.00136094	0.0156422	21.727	19.103	19.743	69.485	37.096	31.002
Nitab4.5_0006642g0040.1	1.1661	4.98251	2.82902e-08	1.34676e-06	19.589	19.976	15.345	39.039	41.013	43.13
Nitab4.5_0000325g0010.1	1.15885	4.97559	0.00309953	0.0300652	16.647	20.65	17.322	63.553	29.456	29.536
Nitab4.5_0000108g0080.1	1.15821	4.37378	1.27553e-06	3.95767e-05	12.922	12.19	9.799	29.223	23.207	25.979
Nitab4.5_0002227g0060.1	1.15739	4.94045	4.20543e-07	1.51493e-05	14.372	16.276	22.537	41.592	40.827	36.872
Nitab4.5_0000775g0060.1	1.15314	4.52736	3.47042e-06	9.4822e-05	12.234	13.836	12.976	24.223	33.318	30.163
Nitab4.5_0000303g0210.1	1.15308	4.75745	6.44478e-07	2.19477e-05	17.579	17.198	11.91	31.136	35.995	36.909
Nitab4.5_0000142g0110.1	1.15181	3.18448	0.0026399	0.0263951	3.567	6.08	3.332	11.806	7.705	11.483
Nitab4.5_0000742g0170.1	1.1515	4.87775	4.071e-06	0.00010896	13.568	19.688	17.073	34.66	45.183	34.024
Nitab4.5_0000140g0040.1	1.14606	3.94894	6.39266e-05	0.001211	9.535	7.548	8.288	16.049	20.95	19.5
Nitab4.5_0000001g0060.1	1.14603	4.61958	5.34533e-06	0.000138353	15.007	13.529	13.452	25.058	34.139	34.992
Nitab4.5_0000318g0030.1	1.14457	3.04713	0.00537623	0.0464042	4.424	4.255	3.611	7.097	9.178	11.98
Nitab4.5_0001002g0070.1	1.14435	4.54787	0.000886352	0.0109702	14.562	13.092	11.32	18.214	33.868	36.623
Nitab4.5_0004792g0010.1	1.14346	4.05472	3.29301e-05	0.000684328	12.732	9.303	5.743	19.66	19.681	22.597
Nitab4.5_0000549g0090.1	1.14333	4.64169	7.4423e-07	2.48203e-05	14.742	13.191	14.435	36.408	28.104	31.776
Nitab4.5_0000798g0050.1	1.1373	3.78756	0.0001806	0.00294473	8.022	7.488	6.684	17.252	19.224	13.51
Nitab4.5_0003265g0120.1	1.13623	5.64927	1.45938e-07	5.78495e-06	35.115	26.66	27.731	65.272	74.994	57.543
Nitab4.5_0000241g0100.1	1.13289	4.29925	0.000209338	0.00332974	8.89	13.221	10.823	26.058	30.007	17.399
Nitab4.5_0000564g0140.1	1.12931	3.29309	0.00256179	0.02591	6.106	5.534	3.466	13.359	8.302	12.607
Nitab4.5_0002156g0110.1	1.1293	3.29343	0.00256179	0.02591	5.673	4.354	5.288	11.893	10.335	12.1
Nitab4.5_0002436g0080.1	1.12888	3.93796	0.000143045	0.00241653	9.483	9.631	6.105	20.903	14.775	20.053
Nitab4.5_0000383g0060.1	1.12522	4.23689	0.000305716	0.00456015	12.996	10.523	7.999	18.99	30.147	21.62
Nitab4.5_0003884g0040.1	1.12469	6.16118	8.91185e-05	0.00161093	52.905	38.681	37.282	85.699	73.063	124.762
Nitab4.5_0000187g0310.1	1.1182	3.6443	0.000369496	0.00536449	6.403	6.973	6.219	11.573	16.948	16.026
Nitab4.5_0001815g0040.1	1.118	5.98735	8.99988e-07	2.93729e-05	40.682	36.242	37.272	101.777	69.145	79.412
Nitab4.5_0002780g0140.1	1.1111	6.54491	8.13435e-05	0.0014864	64.822	48.61	56.973	99.942	104.04	166.482
Nitab4.5_0000977g0070.1	1.10914	4.68635	0.000159537	0.00264628	18.923	15.73	10.989	25.815	32.171	40.282
Nitab4.5_0002070g0020.1	1.10513	3.84635	0.00024046	0.0037276	7.959	8.897	6.778	17.194	14.868	19.74
Nitab4.5_0001176g0090.1	1.10441	3.884	0.00347044	0.0330422	8.805	10.127	5.836	24.767	16.995	11.805
Nitab4.5_0000421g0130.1	1.10271	4.09682	0.000698661	0.00906503	12.647	10.107	6.374	21.602	25.557	15.704
Nitab4.5_0000262g0170.1	1.10201	3.44128	0.00147627	0.0166915	6.223	5.336	5.97	11.379	14.458	12.543
Nitab4.5_0004144g0030.1	1.08989	5.63126	0.00176115	0.0193371	35.623	26.204	28.124	39.738	64.108	88.904
Nitab4.5_0000491g0100.1	1.08909	4.83851	5.32074e-07	1.85691e-05	19.335	17.268	14.135	36.602	39.409	33.075
Nitab4.5_0001207g0050.1	1.08592	4.0852	5.00533e-05	0.000978793	10.753	9.968	8.63	18.913	21.985	21.417
Nitab4.5_0004513g0040.1	1.08332	4.8722	8.09799e-07	2.67766e-05	19.134	18.002	14.549	33.65	38.607	39.305
Nitab4.5_0001344g0050.1	1.08204	4.50684	5.58295e-06	0.000143215	12.806	12.021	14.921	30.874	24.662	29.453
Nitab4.5_0003615g0040.1	1.08158	3.57706	0.00177558	0.0194531	6.096	7.26	6.674	17.777	14.178	9.898
Nitab4.5_0004992g0010.1	1.0773	4.14418	3.50783e-05	0.00072014	10.943	11.466	7.895	22.845	19.858	22.238
Nitab4.5_0001898g0020.1	1.0762	3.42549	0.00204433	0.0217009	5.895	6.328	5.008	10.971	13.46	12.45
Nitab4.5_0000155g0150.1	1.07572	6.98341	1.52127e-09	9.57305e-08	82.887	80.299	72.267	152.903	173.847	175.034
Nitab4.5_0002815g0050.1	1.07553	5.27766	1.24547e-07	5.01311e-06	25.283	22.058	22.785	44.116	53.997	51.239
Nitab4.5_0000758g0030.1	1.06736	3.82311	0.00032974	0.00486445	9.08	7.895	7.202	14.233	17.62	18.072
Nitab4.5_0000365g0240.1	1.06467	5.99605	5.56087e-07	1.9262e-05	44.365	34.615	39.155	73.505	79.965	96.037
Nitab4.5_0000177g0010.1	1.06403	5.54049	0.000229337	0.00358553	28.977	32.84	22.878	75.582	43.075	61.543
Nitab4.5_0000129g0350.1	1.06331	3.3107	0.00408619	0.0374527	4.011	6.239	5.526	12.786	11.025	10.183
Nitab4.5_0002211g0140.1	1.0633	3.31107	0.00408619	0.0374527	6.159	4.503	5.639	9.854	13.404	10.174
Nitab4.5_0001622g0160.1	1.0629	5.10277	0.0023437	0.0241778	21.865	21.156	19.184	59.068	25.828	46.466
Nitab4.5_0002227g0070.1	1.06262	4.03579	0.00419115	0.0382407	9.768	12.924	5.526	21	25.054	14.091
Nitab4.5_0007777g0020.1	1.06236	3.69807	0.00128777	0.0149549	6.35	6.715	7.595	11.359	20.008	14.883
Nitab4.5_0003152g0120.1	1.05633	3.36073	0.00339114	0.0324715	5.091	5.941	5.422	9.65	12.713	12.22
Nitab4.5_0000377g0190.1	1.05543	5.96417	3.47038e-07	1.266e-05	45.095	33.812	36.578	92.058	76.542	74.905
Nitab4.5_0000503g0080.1	1.05448	5.92617	3.20915e-08	1.50988e-06	40.999	39.029	33.464	71.417	84.041	81.144
Nitab4.5_0000332g0240.1	1.05391	4.65092	0.000560448	0.00756342	18.087	14.302	12.779	42.631	26.835	25.684
Nitab4.5_0000588g0050.1	1.05351	5.4282	0.00390309	0.0362535	32.416	21.83	24.586	31.592	61.385	72.26
Nitab4.5_0000588g0110.1	1.05134	3.60272	0.00112288	0.0133796	5.588	6.953	7.471	10.621	15.316	16.828
Nitab4.5_0000308g0260.1	1.04872	4.12534	0.00201499	0.021446	9.874	11.694	8.764	17.252	29.559	17.215
Nitab4.5_0001800g0160.1	1.04861	8.22019	5.03803e-06	0.000131583	181.121	208.235	177.428	313.446	484.147	385.53
Nitab4.5_0001831g0030.1	1.04813	4.50822	0.000919894	0.0113175	12.7	14.877	13.328	39.029	21.136	24.606
Nitab4.5_0000175g0400.1	1.04797	3.96036	0.00352505	0.0335304	10.107	8.55	8.216	12.204	25.446	18.339
Nitab4.5_0004979g0030.1	1.04771	3.1858	0.0059444	0.0499384	5.768	5.931	3.228	11.029	9.3	9.99
Nitab4.5_0000383g0170.1	1.0458	8.04287	9.0218e-07	2.93968e-05	139.412	185.979	175.69	315.611	403.529	326.522
Nitab4.5_0004800g0050.1	1.04431	4.5987	0.000184462	0.00299075	15.674	16.96	10.937	25.282	28.645	36.559
Nitab4.5_0000195g0010.1	1.04234	3.68636	0.00115402	0.0136697	6.71	8.867	6.053	18.126	16.183	10.884
Nitab4.5_0000273g0230.1	1.04112	4.454	0.000174357	0.00285681	9.504	17.605	11.755	31.476	27.563	22.634
Nitab4.5_0004203g0020.1	1.03975	5.57376	0.000916463	0.0113091	33.03	27.88	27.224	38.291	70.395	74.924
Nitab4.5_0003328g0100.1	1.03951	5.88882	6.83038e-07	2.30777e-05	38.872	37.739	34.167	63.718	80.441	85.54
Nitab4.5_0002100g0050.1	1.03871	5.6254	0.000752408	0.00966279	24.542	36.618	30.577	42.485	74.546	73.551
Nitab4.5_0001499g0140.1	1.03819	5.48903	1.3918e-07	5.56085e-06	29.442	29.785	24.161	56.136	62.97	53.967
Nitab4.5_0001497g0140.1	1.0369	3.72433	0.000882113	0.0109446	9.123	7.468	5.619	15.786	13.422	17.012
Nitab4.5_0000066g0140.1	1.03439	3.29436	0.0056094	0.0477214	4.487	5.306	5.422	12.602	12.154	8.654
Nitab4.5_0000173g0130.1	1.02885	3.9833	0.00146129	0.01655	10.297	8.629	8.888	23.942	13.786	19.086
Nitab4.5_0001021g0040.1	1.02853	3.34368	0.00465033	0.0411621	5.725	7.072	3.684	10.612	9.99	13.464
Nitab4.5_0000100g0280.1	1.02663	5.94946	0.00160954	0.0179266	38.502	47.677	29.552	105.369	53.092	80.886
Nitab4.5_0002199g0010.1	1.02124	4.04381	0.000639929	0.00843894	9.345	11.178	8.154	17.427	16.957	25.251
Nitab4.5_0001789g0050.1	1.02008	4.41716	0.00420347	0.0383184	12.679	11.694	13.71	27.709	35.547	15.63
Nitab4.5_0002456g0060.1	1.01988	8.06522	0.00104148	0.0125208	222.152	108.11	186.358	290.815	403.612	360.814
Nitab4.5_0000435g0080.1	1.01813	6.94731	0.00130036	0.0150925	79.141	89.424	67.372	217.194	164.902	101.391
Nitab4.5_0000123g0580.1	1.01675	4.88388	5.28571e-05	0.00102443	17.134	21.602	15.263	39.874	29.997	41.406
Nitab4.5_0006280g0030.1	1.01496	3.90377	0.00444954	0.0399111	10.488	8.867	6.446	12.068	19.196	22.505
Nitab4.5_0003573g0010.1	1.01354	3.48789	0.00265971	0.0265668	6.943	6.824	5.091	15.476	9.439	13.833
Nitab4.5_0000021g0400.1	1.01227	3.75108	0.000996025	0.0120535	9.345	7.27	6.633	18.087	14.784	14.321
Nitab4.5_0001769g0010.1	1.01153	5.68598	8.88508e-06	0.000216871	31.062	27.652	38.275	57.048	76.225	64.538
Nitab4.5_0001700g0100.1	1.01145	3.9728	0.000353877	0.00516379	9.038	9.73	8.785	22.65	17.853	15.731
Nitab4.5_0001093g0050.1	1.01131	3.97101	0.000406112	0.00577534	9.154	10.067	8.795	14.456	21.659	19.427
Nitab4.5_0002100g0020.1	1.00924	3.5321	0.00221025	0.0231374	7.514	6.06	6.115	12.427	11.865	15.519
Nitab4.5_0000039g0010.1	1.00845	4.0031	0.000279472	0.00422023	10.657	10.156	8.102	18.233	16.902	22.127
Nitab4.5_0004932g0030.1	1.00524	3.57501	0.00183767	0.0200136	7.705	7.25	6.084	12.078	12.574	17.335
Nitab4.5_0000525g0100.1	1.00507	4.66154	2.30385e-05	0.000501542	16.87	14.987	14.724	26.136	32.32	35.167
Nitab4.5_0000747g0050.1	1.00284	6.4114	0.000501486	0.00690254	61.15	43.66	58.505	79.874	144.633	105.64
Nitab4.5_0000198g0120.1	1.00216	5.06126	5.48975e-05	0.00105585	19.388	27.484	15.294	38.748	42.991	43.996
Nitab4.5_0001925g0090.1	1.00206	9.20696	9.78657e-05	0.00174246	403.177	404.4	343.588	552.892	818.623	953.707
Nitab4.5_0000163g0190.1	1.0015	3.61781	0.00152862	0.0171678	7.768	7.389	6.55	12.165	15.101	15.077
Nitab4.5_0001614g0110.1	-1.00055	3.81373	0.0011349	0.0135064	15.991	14.788	18.946	5.709	12.154	7.05
Nitab4.5_0002334g0070.1	-1.00129	6.18393	1.06039e-07	4.32247e-06	92.899	97.844	88.45	50.107	51.469	39.443
Nitab4.5_0000238g0060.1	-1.00147	6.72342	2.26674e-06	6.55824e-05	159.446	134.314	114.95	77.495	66.114	62.437
Nitab4.5_0005507g0010.1	-1.00162	5.37282	0.00136552	0.015677	37.793	60.889	58.184	19.398	35.239	24.44
Nitab4.5_0003281g0080.1	-1.0028	5.18457	0.000405239	0.00577107	50.408	42.946	43.687	31.699	15.083	22.385
Nitab4.5_0000962g0030.1	-1.00405	3.26963	0.0056094	0.0477214	10.604	8.302	13.876	6.068	4.682	5.087
Nitab4.5_0000161g0160.1	-1.0047	6.07116	3.03921e-07	1.12295e-05	78.114	96.208	84.239	46.99	38.29	44.355
Nitab4.5_0001582g0020.1	-1.00694	3.63101	0.00172646	0.0189819	15.102	14.977	13.669	9.34	6.389	6.506
Nitab4.5_0000202g0070.1	-1.00714	8.47352	4.50278e-11	3.84206e-09	462.58	462.234	462.553	234.699	227.508	234.669
Nitab4.5_0002944g0100.1	-1.00752	7.98256	2.88146e-06	8.11525e-05	285.375	351.962	348.886	197.495	157.001	140.19
Nitab4.5_0000033g0230.1	-1.00798	6.22129	5.41502e-06	0.000139977	111.123	76.312	100.65	52.806	45.752	45.913
Nitab4.5_0000914g0170.1	-1.00897	4.34048	0.000566215	0.00762668	20.595	27.722	26.034	7.796	15.792	14.008
Nitab4.5_0000962g0010.1	-1.00957	3.9208	0.00408897	0.0374611	15.631	13.588	25.579	8.01	11.016	7.889
Nitab4.5_0000068g0210.1	-1.00976	4.16245	0.000111941	0.00194995	23.749	20.015	21.637	13.99	11.771	7.465
Nitab4.5_0000385g0190.1	-1.01067	5.18856	2.61768e-07	9.85009e-06	46.682	46.636	44.836	23.67	26.201	19.39
Nitab4.5_0001014g0060.1	-1.0119	5.23565	0.00455131	0.0406248	45.264	56.852	40.738	35.971	20.894	14.579
Nitab4.5_0003746g0030.1	-1.01203	5.29187	3.30011e-05	0.000685096	41.2	51.466	55.649	18.67	27.694	27.656
Nitab4.5_0000375g0070.1	-1.01416	6.05031	2.90983e-05	0.000616792	90.761	83.602	80.783	41.495	55.247	30.817
Nitab4.5_0004360g0030.1	-1.0151	6.63691	1.33397e-05	0.00030876	139.783	139.551	106.827	79.466	59.099	53.516
Nitab4.5_0000355g0030.1	-1.01552	5.45211	2.80932e-08	1.34055e-06	54.345	55.9	56.673	29.825	26.49	27.076
Nitab4.5_0000707g0080.1	-1.01772	5.09502	5.42362e-06	0.00014002	38.586	47.608	42.497	24.019	23.02	17.326
Nitab4.5_0000578g0110.1	-1.01775	4.05085	0.000231358	0.00361258	20.172	20.997	18.781	13.612	6.287	9.99
Nitab4.5_0002397g0040.1	-1.01851	3.78939	0.000540031	0.0073279	18.997	14.352	16.152	7.408	8.087	8.534
Nitab4.5_0003465g0060.1	-1.01917	6.33623	4.14977e-08	1.89918e-06	95.333	114.497	102.875	48.641	55.741	51.138
Nitab4.5_0000287g0020.1	-1.01955	4.65394	0.000496415	0.00685618	26.765	30.727	35.978	9.417	20.157	16.551
Nitab4.5_0002312g0100.1	-1.02002	10.5954	0.000102542	0.00181131	2212.8	1809.64	2052.52	698.542	1209.63	1113.18
Nitab4.5_0000652g0080.1	-1.02054	5.43309	3.11614e-06	8.67907e-05	52.164	48.6	64.413	28.087	30.221	24.274
Nitab4.5_0000244g0350.1	-1.02172	11.2301	8.04941e-06	0.000198155	3814.47	2514.81	3111.2	1413.51	1494.26	1781.1
Nitab4.5_0000287g0140.1	-1.02236	8.55539	1.63163e-05	0.000370419	571.936	409.686	493.916	288.242	193.118	250.539
Nitab4.5_0002367g0140.1	-1.02258	5.00662	2.71977e-07	1.01422e-05	43.222	38.374	40.21	19.282	19.066	21.556
Nitab4.5_0000652g0050.1	-1.02297	5.57709	0.000239906	0.00372186	57.266	59.847	65.406	23	42.963	25.039
Nitab4.5_0001315g0280.1	-1.02318	5.69004	1.00634e-05	0.000241535	73.278	65.352	59.115	42.437	28.608	27.5
Nitab4.5_0000845g0120.1	-1.02335	3.86314	0.000375701	0.00543108	19.283	15.77	17.218	11	8.479	6.727
Nitab4.5_0000233g0210.1	-1.0238	5.21192	1.38349e-05	0.000318757	43.793	52.835	43.997	26.233	26.238	17.353
Nitab4.5_0007257g0020.1	-1.02389	7.38451	0.00157234	0.0175803	176.4	235.63	239.461	154.679	97.118	71.947
Nitab4.5_0000287g0100.1	-1.02633	4.73556	0.00281008	0.0277385	34.84	28.138	37.158	20.893	7.9	20.376
Nitab4.5_0000410g0400.1	-1.02644	6.4395	2.78867e-06	7.88699e-05	104.604	112.851	118.913	57.903	66.972	42.411
Nitab4.5_0000059g0360.1	-1.02716	6.09139	0.00344571	0.0328533	83.205	96.247	83.525	24.282	64.864	41.314
Nitab4.5_0000172g0530.1	-1.02735	6.42722	5.60799e-09	3.14563e-07	107.811	111.373	115.105	60.427	55.713	49.111
Nitab4.5_0000629g0030.1	-1.03065	3.64552	0.00127212	0.0148245	17.706	12.081	14.435	7.204	7.658	7.271
Nitab4.5_0000847g0030.1	-1.03091	6.24943	2.62186e-07	9.85009e-06	95.968	98.092	100.764	57.398	39.4	48.779
Nitab4.5_0000976g0030.1	-1.03204	6.0516	2.08215e-09	1.27442e-07	86.115	87.152	83.245	40.417	44.278	41.876
Nitab4.5_0002587g0080.1	-1.03296	6.80321	1.27089e-09	8.22893e-08	149.307	137.835	148.145	75.903	72.904	66.51
Nitab4.5_0001494g0050.1	-1.03393	6.05322	2.70935e-06	7.70596e-05	104.043	77.789	75.526	45.747	37.497	43.397
Nitab4.5_0002716g0020.1	-1.03466	5.29834	0.000251854	0.0038744	45.444	53.787	50.92	23.903	34.223	16.386
Nitab4.5_0000377g0050.1	-1.03489	5.99117	1.04922e-05	0.000250632	68.378	97.21	80.307	34.107	47.057	40.19
Nitab4.5_0001143g0010.1	-1.03551	3.287	0.00408619	0.0374527	12.255	9.611	10.627	4.515	6.249	6.073
Nitab4.5_0001600g0040.1	-1.03568	4.96942	2.40867e-06	6.92907e-05	40.703	40.179	37.416	24.029	19.01	14.911
Nitab4.5_0000095g0170.1	-1.03602	7.39495	1.14851e-05	0.000271132	279.015	199.12	182.033	120.281	98.266	106.451
Nitab4.5_0002522g0040.1	-1.03739	4.79847	0.000596546	0.00795539	42.163	37.819	24.71	19.466	13.096	19.086
Nitab4.5_0000506g0010.1	-1.03757	4.15241	0.000579025	0.00777509	20.881	23.447	21.078	16.272	9.244	6.276
Nitab4.5_0000027g0570.1	-1.03775	4.49527	0.00555501	0.0473988	35.835	25.5	23.354	13.116	7.527	20.256
Nitab4.5_0000204g0020.1	-1.04208	6.93354	1.37489e-09	8.78927e-08	171.246	156.749	150.463	82.961	73.51	77.532
Nitab4.5_0000915g0120.1	-1.04343	6.03627	1.93356e-08	9.83237e-07	93.016	86.706	75.299	42.447	39.344	42.706
Nitab4.5_0000407g0080.1	-1.04475	6.00004	6.68443e-08	2.90722e-06	90.74	80.497	76.923	43.981	43.793	34.421
Nitab4.5_0001599g0060.1	-1.04601	4.26263	0.00263373	0.0263951	27.305	27.156	16.204	12.495	7.705	14.248
Nitab4.5_0000483g0130.1	-1.04606	3.48416	0.00194491	0.0208767	11.335	14.709	12.738	7.078	6.175	5.824
Nitab4.5_0001083g0070.1	-1.05081	7.47772	4.58538e-09	2.63444e-07	238.365	226.753	235.136	106.233	106.465	128.891
Nitab4.5_0001226g0010.1	-1.05087	4.04072	8.19761e-05	0.0014966	20.584	19.47	19.671	10.583	9.617	9.17
Nitab4.5_0000185g0230.1	-1.05175	6.19786	5.49266e-07	1.90699e-05	102.107	90.594	92.227	56.048	46.628	36.706
Nitab4.5_0000245g0160.1	-1.05207	4.69449	5.23587e-05	0.00101673	34.459	37.888	25.258	15.136	13.516	18.293
Nitab4.5_0000337g0210.1	-1.05366	6.70866	0.000571091	0.0076872	179.12	87.926	142.992	75.019	56.684	67.865
Nitab4.5_0002762g0020.1	-1.05423	4.73472	1.80256e-06	5.3935e-05	36.427	33.643	30.318	13.68	15.801	18.717
Nitab4.5_0000399g0030.1	-1.05431	8.65341	3.20955e-06	8.89006e-05	602.236	449.072	539.207	218.359	243.104	310.579
Nitab4.5_0000109g0460.1	-1.05783	5.86522	3.69284e-07	1.33746e-05	70.061	74.268	82.562	38.981	28.962	41.13
Nitab4.5_0003463g0120.1	-1.06017	6.85944	6.38776e-06	0.000161287	149.329	139.392	166.905	79.641	87.166	53.884
Nitab4.5_0005739g0050.1	-1.06018	6.68675	0.000157035	0.00260908	127.093	172.103	104.427	82.825	55.546	56.769
Nitab4.5_0000093g0090.1	-1.0604	4.32633	0.000143195	0.00241702	22.024	24.806	27.721	14.408	14.588	7.428
Nitab4.5_0005622g0050.1	-1.06051	5.34979	1.1055e-08	5.8276e-07	53.212	53.331	50.082	24.582	25.054	26.219
Nitab4.5_0000319g0240.1	-1.06068	6.1007	6.91763e-10	4.95731e-08	86.105	92.27	89.04	43.67	43.457	41.876
Nitab4.5_0004813g0050.1	-1.06446	3.25115	0.00356315	0.033797	12.446	9.502	10.999	4.495	4.085	7.52
Nitab4.5_0001352g0020.1	-1.06629	3.304	0.00295923	0.0289131	10.573	12.14	11.248	5.262	4.3	6.58
Nitab4.5_0000069g0310.1	-1.06798	5.93896	0.00165321	0.0183521	74.95	92.994	70.477	58.689	28.934	27.73
Nitab4.5_0000026g0030.1	-1.068	3.35649	0.00245898	0.0250336	13.123	10.771	11.827	5.505	5.979	5.391
Nitab4.5_0003978g0020.1	-1.06829	8.95686	4.71726e-07	1.67072e-05	696.691	615.402	656.826	303.378	261.097	382.849
Nitab4.5_0000996g0010.1	-1.06956	3.40572	0.00204433	0.0217009	12.827	11.634	12.22	4.854	7.201	5.483
Nitab4.5_0005451g0040.1	-1.07029	6.69777	4.35985e-08	1.98181e-06	142.026	135.375	130.782	71.835	71.281	52.769
Nitab4.5_0000500g0010.1	-1.07088	6.16475	2.61564e-09	1.56759e-07	87.502	93.5	99.087	44.32	42.394	47.83
Nitab4.5_0000416g0140.1	-1.07094	4.62762	1.71024e-06	5.14784e-05	27.601	32.145	33.402	16.563	15.232	13.326
Nitab4.5_0000514g0100.1	-1.07131	5.32174	1.02299e-06	3.29599e-05	54.122	49.522	50.309	29.757	26.229	18.137
Nitab4.5_0002906g0140.1	-1.07178	4.64911	5.56711e-07	1.9262e-05	32.268	31.451	30.753	17.68	15.903	12.533
Nitab4.5_0000588g0290.1	-1.07197	4.92183	0.000208295	0.00331576	37.073	42.282	35.895	16.835	12.238	26.044
Nitab4.5_0000062g0390.1	-1.07279	10.5512	9.38829e-10	6.43034e-08	1744.12	2053.61	2159.12	975.202	937.736	947.542
Nitab4.5_0000175g0420.1	-1.07366	4.30792	0.000164849	0.00272542	25.4	29.209	19.474	15.437	9.421	10.561
Nitab4.5_0001285g0020.1	-1.0747	4.28191	2.09266e-05	0.000460545	24.299	20.154	27.462	10.078	10.885	13.04
Nitab4.5_0000003g0030.1	-1.0748	3.58971	0.000981015	0.0119148	15.473	10.603	16.359	7.039	6.734	6.285
Nitab4.5_0002533g0070.1	-1.07519	6.28983	2.72695e-09	1.62463e-07	105.631	99.838	100.898	42.466	51.703	52.742
Nitab4.5_0000170g0260.1	-1.07643	4.36006	3.93938e-06	0.000105911	27.739	21.89	27.214	12.087	11.529	13.39
Nitab4.5_0001968g0130.1	-1.07658	4.20053	0.00148141	0.0167402	28.553	16.544	23.851	11.971	6.66	13.685
Nitab4.5_0001195g0010.1	-1.07686	4.86107	1.1058e-06	3.50669e-05	39.729	34.238	35.802	21.815	16.165	15.132
Nitab4.5_0000116g0220.1	-1.07822	4.89488	2.66377e-07	9.97033e-06	36.777	36.023	40.127	15.126	18.823	19.722
Nitab4.5_0000582g0130.1	-1.07917	5.86367	2.05254e-09	1.26398e-07	77.998	74.477	74.564	41.165	34.139	33.232
Nitab4.5_0001911g0060.1	-1.07964	4.50419	1.70276e-06	5.13299e-05	27.717	27.692	30.442	16.893	11.51	12.662
Nitab4.5_0000249g0420.1	-1.08139	7.82866	4.90364e-05	0.000963361	316.109	319.856	264.606	137.883	103.741	187.706
Nitab4.5_0005664g0020.1	-1.08361	6.41486	0.000793879	0.0101159	112.69	143.201	79.044	72.349	46.087	41.415
Nitab4.5_0000058g0130.1	-1.08374	3.99735	9.51643e-05	0.0017034	20.097	22.931	15.211	8.971	9.719	9.105
Nitab4.5_0001028g0060.1	-1.08392	3.99819	6.20193e-05	0.00117708	19.695	19.083	19.412	9.282	9.272	8.985
Nitab4.5_0003823g0060.1	-1.08414	7.11483	0.00315626	0.0304883	183.184	159.358	205.066	47.806	128.468	84.029
Nitab4.5_0000956g0100.1	-1.08453	4.755	1.91849e-07	7.44366e-06	33.21	33.742	35.316	15.078	18.245	15.049
Nitab4.5_0000005g0290.1	-1.08455	5.96271	1.90648e-07	7.41134e-06	87.036	75.111	81.341	45.417	40.855	30.44
Nitab4.5_0001239g0160.1	-1.08471	8.67259	4.7227e-09	2.69324e-07	533.329	482.209	606.548	240.009	278.791	253.515
Nitab4.5_0000902g0020.1	-1.08515	5.71055	0.000212563	0.00337569	68.727	63.616	71.294	26.942	47.151	23.039
Nitab4.5_0005658g0030.1	-1.08663	4.1518	2.55554e-05	0.000552666	21.643	20.392	23.572	8.777	11.603	10.699
Nitab4.5_0002031g0110.1	-1.08701	5.45335	1.06038e-07	4.32247e-06	60.546	58.935	49.823	29.66	27.712	23.27
Nitab4.5_0000783g0150.1	-1.08702	5.74774	8.10559e-09	4.3526e-07	65.531	72.275	71.263	28.99	36.256	34.19
Nitab4.5_0003234g0130.1	-1.09048	6.97049	9.20974e-09	4.93235e-07	182.211	142.606	171.613	82.505	78.212	74.011
Nitab4.5_0004743g0070.1	-1.09099	5.21266	1.65304e-08	8.44854e-07	47.963	49.324	45.829	24.621	21.91	21.233
Nitab4.5_0000080g0250.1	-1.09664	3.56031	0.00231086	0.0239248	11.79	16.425	13.71	10.078	5.429	3.972
Nitab4.5_0000927g0060.1	-1.09742	4.41773	0.0053648	0.0463652	38.174	22.941	19.753	11.641	7.928	17.63
Nitab4.5_0001006g0050.1	-1.09856	6.83593	0.00038665	0.00555347	121.019	123.027	207.001	57.097	87.334	68.786
Nitab4.5_0005199g0030.1	-1.0987	3.51649	0.00338141	0.0323937	13.24	9.74	17.115	5.864	8.908	4.875
Nitab4.5_0002234g0090.1	-1.09935	3.64397	0.00055755	0.00753516	15.272	17.01	12.313	6.971	4.356	9.584
Nitab4.5_0000063g0340.1	-1.09971	9.39279	7.08113e-08	3.05993e-06	960.752	861.655	862.617	468.019	337.172	458.344
Nitab4.5_0001176g0120.1	-1.10097	3.90991	7.63139e-05	0.00140341	21.209	17.903	15.552	10.845	6.781	8.064
Nitab4.5_0000703g0230.1	-1.10174	7.35369	8.1507e-10	5.73883e-08	220.691	218.55	211.109	116.31	95.551	93.549
Nitab4.5_0000960g0060.1	-1.10175	5.58245	0.000749719	0.00964054	66.378	78.236	42.58	28	21.808	37.96
Nitab4.5_0000622g0230.1	-1.10259	6.42338	9.04606e-08	3.79501e-06	117.399	94.67	126.974	53.165	57.364	48.401
Nitab4.5_0001468g0030.1	-1.10269	4.24665	1.1991e-05	0.000281219	21.23	22.237	26.779	13.447	11.286	8.773
Nitab4.5_0001752g0090.1	-1.10346	8.02294	4.77993e-08	2.14851e-06	323.284	358.26	354.763	135.184	191.691	160.317
Nitab4.5_0001843g0050.1	-1.1037	4.5641	1.68033e-05	0.000380188	35.073	30.886	23.954	16.981	12.303	13.446
Nitab4.5_0003511g0020.1	-1.10374	4.49583	1.06124e-06	3.39749e-05	25.569	29.041	30.784	14.175	12.061	13.639
Nitab4.5_0004926g0030.1	-1.10379	10.397	4.28879e-07	1.53945e-05	1929.38	1697.5	1767.16	1053.48	704.799	775.687
Nitab4.5_0000082g0160.1	-1.10383	4.54248	0.00144657	0.0164111	33.464	27.573	27.607	20.097	6.912	14.386
Nitab4.5_0002152g0050.1	-1.10398	4.52034	2.37323e-06	6.83686e-05	30.85	24.875	30.846	15.029	13.544	11.888
Nitab4.5_0004783g0020.1	-1.10462	6.58334	8.02074e-06	0.000197691	136.047	110.5	132.82	45.582	77.251	55.073
Nitab4.5_0002424g0030.1	-1.10468	6.30445	4.13352e-09	2.39875e-07	107.821	97.061	107.189	44.252	56.562	45.037
Nitab4.5_0000745g0130.1	-1.10504	5.44113	4.23133e-08	1.93212e-06	56.218	60.889	51.872	31.349	23.664	24.357
Nitab4.5_0000697g0180.1	-1.10588	7.01866	3.0024e-08	1.41591e-06	173.808	170.159	171.116	81.961	65.582	93.77
Nitab4.5_0001714g0100.1	-1.1066	6.55311	5.98537e-08	2.6316e-06	115.103	123.92	131.889	52.573	70.395	51.101
Nitab4.5_0003770g0010.1	-1.10728	6.29279	1.01839e-10	8.30254e-09	104.467	104.133	100.215	46.534	51.432	46.705
Nitab4.5_0000238g0020.1	-1.10845	5.12212	1.08499e-05	0.000258256	49.614	36.123	49.451	22.32	16.23	24.597
Nitab4.5_0000588g0250.1	-1.1087	12.6026	2.25959e-06	6.54697e-05	9029.48	8424.99	7474.32	4851.54	3026.34	3790.52
Nitab4.5_0001268g0010.1	-1.11432	6.11286	3.05087e-09	1.79112e-07	84.168	99.997	88.585	39.146	43.401	44.834
Nitab4.5_0000945g0020.1	-1.11626	4.45942	0.000328303	0.0048468	36.628	24.429	22.413	16.825	11.566	10.755
Nitab4.5_0004479g0010.1	-1.11641	4.40892	1.25467e-06	3.89895e-05	27.336	26.631	26.076	11.631	10.251	15.132
Nitab4.5_0001553g0040.1	-1.11662	4.38409	2.03218e-06	6.00912e-05	28.299	27.404	23.261	9.825	12.424	14.727
Nitab4.5_0009314g0020.1	-1.11671	4.61529	3.84673e-05	0.000780077	31.908	24.28	37.541	12.99	16.78	13.261
Nitab4.5_0001664g0090.1	-1.1172	6.53079	1.36021e-10	1.08693e-08	129.03	121.103	116.202	55.388	54.035	61.275
Nitab4.5_0001815g0050.1	-1.1183	5.56265	2.32591e-08	1.13681e-06	61.435	63.973	59.239	29.097	23.459	33.315
Nitab4.5_0007963g0040.1	-1.12003	3.88634	9.11118e-05	0.00163833	17.674	18.329	18.17	9.757	7.863	7.17
Nitab4.5_0002747g0010.1	-1.12009	7.21021	8.51238e-10	5.96373e-08	208.711	184.005	197.575	97.806	79.695	96.369
Nitab4.5_0000720g0010.1	-1.12207	5.63263	5.08126e-07	1.7826e-05	70.653	62.525	61.226	38.194	23.86	28.338
Nitab4.5_0000005g0190.1	-1.12238	5.58955	0.000495757	0.00685179	44.386	85.625	58.712	24.864	36.918	25.316
Nitab4.5_0000999g0020.1	-1.12318	9.31051	3.34772e-08	1.56411e-06	875.176	803.226	869.695	479.737	359.111	342.272
Nitab4.5_0000424g0040.1	-1.12356	3.52909	0.0007379	0.00951287	10.647	17.069	13.938	5.398	6.1	7.538
Nitab4.5_0001190g0050.1	-1.1241	3.48391	0.000884517	0.0109542	10.615	15.492	14.052	5.175	6.94	6.774
Nitab4.5_0000040g0100.1	-1.12467	3.43736	0.00106056	0.0127122	11.483	15.78	11.579	7.194	4.804	5.926
Nitab4.5_0000280g0230.1	-1.12509	5.86856	9.23139e-08	3.8487e-06	85.882	67.435	76.654	41.932	34.978	30.255
Nitab4.5_0001662g0030.1	-1.12594	5.10328	7.27717e-05	0.0013506	55.149	30.806	47.329	18.515	21.351	21.777
Nitab4.5_0000202g0310.1	-1.12596	3.33847	0.00152603	0.0171578	11.61	14.064	9.706	4.447	6.054	5.677
Nitab4.5_0000439g0080.1	-1.12665	6.91437	1.04845e-05	0.000250632	160.621	163.067	157.137	100.738	66.16	55.783
Nitab4.5_0000483g0250.1	-1.12835	3.17705	0.00370751	0.0348056	10.245	11.327	9.737	4.068	5.298	4.58
Nitab4.5_0000246g0220.1	-1.12835	3.17795	0.00370751	0.0348056	10.223	9.184	11.496	5.796	5.084	3.99
Nitab4.5_0002055g0050.1	-1.13008	5.34726	3.36757e-06	9.2388e-05	45.243	52.121	61.06	30.136	23.692	19.408
Nitab4.5_0000813g0090.1	-1.13035	3.05847	0.00537623	0.0464042	8.943	8.649	10.875	4.553	3.61	4.728
Nitab4.5_0001601g0050.1	-1.13036	3.05723	0.00537623	0.0464042	9.546	9.165	9.654	1.99	3.479	7.225
Nitab4.5_0000130g0290.1	-1.13179	7.44786	4.57399e-08	2.06981e-06	246.63	225.91	226.951	128.349	87.213	106.506
Nitab4.5_0006928g0020.1	-1.13417	4.0916	0.000152269	0.0025446	20.997	25.659	17.601	11.961	6.203	11.354
Nitab4.5_0002629g0090.1	-1.13568	4.70968	1.2286e-06	3.82978e-05	30.596	32.919	37.085	17.854	11.799	16.293
Nitab4.5_0000028g0200.1	-1.13641	8.64245	3.75404e-05	0.00076436	450.632	453.644	700.482	200.757	293.948	242.751
Nitab4.5_0000716g0080.1	-1.13682	3.99913	2.77011e-05	0.000590283	21.907	20.432	16.577	11.272	8.675	7.087
Nitab4.5_0000102g0020.1	-1.13742	5.51539	0.00172185	0.018947	65.256	47.876	66.296	13.893	36.116	32.421
Nitab4.5_0001354g0040.1	-1.14031	8.85504	3.03903e-10	2.30932e-08	666.772	544.913	652.636	301.844	292.083	259.929
Nitab4.5_0001841g0120.1	-1.14058	8.09725	3.92491e-05	0.000793534	435.371	330.697	335.093	181.951	208.023	115.049
Nitab4.5_0002053g0080.1	-1.14087	5.0138	0.00428979	0.0389419	50.524	28.456	46.895	18.223	10.979	28.136
Nitab4.5_0003475g0010.1	-1.14194	4.30011	0.000219306	0.00346365	24.14	29.289	20.002	15.709	10.335	8.082
Nitab4.5_0000436g0160.1	-1.14226	4.7282	0.00280886	0.0277385	43.084	35.408	24.099	9.223	15.111	22.422
Nitab4.5_0000367g0060.1	-1.14248	6.22149	0.0010147	0.0122482	108.033	98.003	90.013	43.592	25.464	66.547
Nitab4.5_0000009g0500.1	-1.14391	8.42963	4.77561e-10	3.52258e-08	536.853	413.465	438.071	207.087	212.23	213.961
Nitab4.5_0001454g0160.1	-1.14409	3.71155	0.0002488	0.00383366	17.251	15.998	14.29	5.204	5.009	11.206
Nitab4.5_0000564g0060.1	-1.14422	4.27466	7.65217e-05	0.00140595	22.817	24.072	25.641	15.699	10.811	6.58
Nitab4.5_0000221g0020.1	-1.14442	4.29957	1.91488e-05	0.000424212	24.045	28.942	21.295	11.33	14.01	8.598
Nitab4.5_0000069g0590.1	-1.14456	3.67351	0.000389315	0.00558378	13.028	14.887	17.798	8.049	9.01	4.202
Nitab4.5_0000482g0250.1	-1.14564	5.04129	2.78047e-06	7.88595e-05	42.989	38.334	46.822	22.233	22.423	13.602
Nitab4.5_0000328g0110.1	-1.14702	6.97082	4.62426e-06	0.000122043	192.529	156.551	153.784	97.31	75.665	56.603
Nitab4.5_0000012g0260.1	-1.14761	4.21826	5.86667e-06	0.000149541	22.585	26.174	21.74	10.942	10.941	9.916
Nitab4.5_0000232g0040.1	-1.14821	6.86641	2.72062e-12	2.92969e-10	156.261	155.658	155.274	72.679	71.43	67.901
Nitab4.5_0000452g0110.1	-1.1485	8.89312	6.74025e-07	2.28115e-05	594.616	578.06	743.476	359.718	262.16	251.331
Nitab4.5_0001235g0040.1	-1.14987	7.73456	1.71919e-08	8.76438e-07	310.987	242.543	303.015	132.592	144.698	112.635
Nitab4.5_0003477g0010.1	-1.15053	5.43422	3.49037e-06	9.5238e-05	59.954	52.954	56.683	31.874	17.237	28.523
Nitab4.5_0006816g0030.1	-1.15133	4.10398	0.0019941	0.0212678	19.854	16.663	27.379	7.748	14.924	6.672
Nitab4.5_0002263g0060.1	-1.15156	6.51295	1.43058e-06	4.38473e-05	135.793	113.446	115.809	64.631	62.159	39.683
Nitab4.5_0001781g0170.1	-1.15164	6.67648	5.37255e-08	2.38823e-06	128.734	136.942	143.613	63.679	73.501	48.677
Nitab4.5_0000286g0080.1	-1.15222	4.50342	1.03378e-06	3.32544e-05	24.235	31.183	30.949	12.107	14.346	13.317
Nitab4.5_0000244g0070.1	-1.15325	5.33194	3.31337e-06	9.12741e-05	52.778	61.761	43.428	19.534	23.142	28.56
Nitab4.5_0000063g0210.1	-1.15352	6.27945	8.06813e-07	2.67657e-05	95.354	121.866	92.124	57.68	43.933	39.351
Nitab4.5_0001160g0090.1	-1.15395	4.01086	4.69666e-05	0.000925408	20.097	17.952	22.247	10.99	10.689	5.161
Nitab4.5_0003304g0010.1	-1.15424	4.00915	1.98224e-05	0.000438159	17.261	20.283	22.702	8.641	10.885	8.036
Nitab4.5_0000197g0130.1	-1.15442	6.99504	0.000663606	0.00868293	216.743	139.769	155.802	109.689	73.063	49.922
Nitab4.5_0001170g0160.1	-1.16038	6.00191	0.00113553	0.0135064	70.505	87.728	96.894	52.757	42.506	20.127
Nitab4.5_0000113g0210.1	-1.16125	3.19613	0.0026399	0.0263951	11.589	11.585	8.868	4.146	4.561	5.161
Nitab4.5_0001511g0010.1	-1.16125	3.19649	0.0026399	0.0263951	10.086	9.393	12.614	4.311	4.533	5.161
Nitab4.5_0004588g0030.1	-1.164	5.14956	0.00421143	0.0383562	60.398	39.842	39.258	34.243	12.62	15.814
Nitab4.5_0001256g0050.1	-1.16474	7.98069	4.44336e-05	0.000880668	313.95	270.007	435.422	114.67	178.791	165.837
Nitab4.5_0004506g0060.1	-1.16655	3.07866	0.00381022	0.0356535	12.054	8.966	7.999	3.087	4.197	6.101
Nitab4.5_0001894g0060.1	-1.16922	4.41686	0.000368816	0.00535848	28.575	30.429	22.816	14.184	6.091	16.376
Nitab4.5_0002469g0080.1	-1.17024	6.53993	2.41421e-09	1.45553e-07	111.748	141.574	119.193	57.835	59.389	50.207
Nitab4.5_0000045g0090.1	-1.17052	5.03983	9.19783e-08	3.84267e-06	44.777	47.42	37.158	21.515	19.093	17.114
Nitab4.5_0003911g0010.1	-1.17088	3.60274	0.000316	0.00468578	12.509	14.56	16.463	5	7.117	8.027
Nitab4.5_0002904g0090.1	-1.17199	7.83535	1.11393e-09	7.33048e-08	324.269	307.547	291.416	163.33	129.448	121.5
Nitab4.5_0001413g0040.1	-1.17303	2.95134	0.00550621	0.0471691	7.832	9.194	8.661	3.223	5.457	2.746
Nitab4.5_0006338g0100.1	-1.17511	6.87987	2.46144e-11	2.22269e-09	146.799	154.885	172.089	70.417	71.468	69.828
Nitab4.5_0000008g0510.1	-1.17585	7.4181	2.6217e-06	7.49902e-05	282.296	208.096	201.683	128.815	88.388	91.328
Nitab4.5_0002780g0130.1	-1.1762	5.26929	1.17077e-08	6.15556e-07	50.556	46.011	55.659	24.903	21.948	20.846
Nitab4.5_0002050g0080.1	-1.1774	3.5168	0.00426003	0.0387463	14.266	9.105	17.88	3.913	8.805	5.216
Nitab4.5_0004479g0090.1	-1.17817	3.88617	3.97302e-05	0.000801349	18.552	18.547	17.715	9.66	4.626	10.137
Nitab4.5_0000343g0140.1	-1.17839	4.2096	3.58457e-06	9.76759e-05	22.775	23.645	23.013	11.126	10.466	9.861
Nitab4.5_0005936g0030.1	-1.17858	5.33879	2.20863e-08	1.09276e-06	49.265	53.569	57.097	28.223	20.222	22.615
Nitab4.5_0003282g0010.1	-1.18052	3.85054	0.000223507	0.00350799	19.357	18.27	15.997	9.883	3.143	10.183
Nitab4.5_0000446g0040.1	-1.18173	10.1639	2.18622e-06	6.37602e-05	1907.72	1308.64	1453.02	860.688	631.205	584.867
Nitab4.5_0000143g0100.1	-1.18296	6.50707	7.55658e-05	0.00139219	122.045	125.784	118.323	65.359	66.254	31.472
Nitab4.5_0000441g0220.1	-1.18327	3.37348	0.000770245	0.00985414	14.256	11.971	10.772	6.078	4.365	5.834
Nitab4.5_0002626g0020.1	-1.18342	4.09148	0.000127615	0.00218891	20.394	27.236	16.525	10.097	7.164	10.174
Nitab4.5_0000110g0130.1	-1.18394	5.69393	6.74362e-11	5.61141e-09	68.473	70.252	66.865	30.718	33.626	27.822
Nitab4.5_0003173g0080.1	-1.18399	4.59449	3.78689e-06	0.00010251	34.946	28.971	29.842	18.437	10.036	12.45
Nitab4.5_0000785g0100.1	-1.18422	3.77721	0.000111046	0.0019394	15.123	19.648	16.214	9.282	8.516	5.142
Nitab4.5_0005042g0020.1	-1.18729	6.74134	2.46182e-07	9.31835e-06	152.186	150.897	128.681	61.757	49.874	79.624
Nitab4.5_0002029g0010.1	-1.18975	4.27367	1.81616e-06	5.42613e-05	26.373	24.895	22.464	11.495	8.544	11.686
Nitab4.5_0000883g0010.1	-1.19027	4.86134	1.16011e-07	4.70041e-06	37.951	33.534	42.156	14.777	19.177	16.634
Nitab4.5_0001984g0050.1	-1.19037	6.3103	0.00547421	0.0469881	100.032	124.366	94.39	53.961	67.121	19.519
Nitab4.5_0000318g0170.1	-1.19058	5.16559	2.69768e-05	0.000579139	39.264	57.149	44.401	27.223	20.371	15.049
Nitab4.5_0001288g0220.1	-1.19073	7.41848	8.13568e-10	5.73883e-08	232.089	203.504	257.042	93.077	111.063	102.147
Nitab4.5_0000779g0070.1	-1.19118	5.24978	1.00291e-09	6.76065e-08	49.72	53.242	46.936	21.689	22.134	22.735
Nitab4.5_0002067g0060.1	-1.19146	3.65879	0.000188506	0.00304328	13.081	17.774	15.097	6.136	8.246	6.128
Nitab4.5_0002411g0030.1	-1.19194	6.37591	2.21466e-06	6.42601e-05	123.315	110.272	100.898	37.495	65.666	44.705
Nitab4.5_0004843g0020.1	-1.1933	3.61845	0.00127579	0.0148586	18.605	16.226	10.027	9.107	5.708	5.327
Nitab4.5_0000655g0030.1	-1.19333	5.22913	0.000615105	0.00815966	45.899	49.76	52.006	34.582	16.584	14.386
Nitab4.5_0001653g0130.1	-1.1935	8.21926	2.83224e-10	2.17211e-08	395.62	416.54	399.102	210.912	160.816	163.045
Nitab4.5_0001651g0090.1	-1.19663	4.62113	0.000102994	0.00181769	29.781	29.2	36.671	7.699	18.301	15.787
Nitab4.5_0002322g0140.1	-1.19681	5.72208	1.05788e-05	0.0002524	74.76	54.372	81.321	35.175	22.703	34.817
Nitab4.5_0002265g0230.1	-1.19711	3.57473	0.000268265	0.00409557	12.869	14.61	15.739	5.854	7.387	6.156
Nitab4.5_0000171g0350.1	-1.1972	5.80269	1.97161e-10	1.56308e-08	69.288	82.034	72.36	32.146	33.784	32.209
Nitab4.5_0007452g0030.1	-1.20122	5.45329	1.76744e-05	0.000397665	46.704	51.972	75.288	21.718	24.261	30.052
Nitab4.5_0000190g0030.1	-1.20414	7.69214	2.1952e-05	0.000479965	328.904	275.62	237.464	95.019	106.082	166.316
Nitab4.5_0003096g0030.1	-1.20452	5.99977	2.66987e-09	1.59535e-07	99.831	75.994	81.921	39.971	37.646	34.882
Nitab4.5_0004905g0080.1	-1.20575	8.64674	1.00867e-07	4.17074e-06	504.553	460.071	668.902	254.621	253.206	207.842
Nitab4.5_0000084g0310.1	-1.20605	4.44324	1.4168e-07	5.62725e-06	29.305	27.037	28.476	14.097	12.741	10.008
Nitab4.5_0000652g0090.1	-1.20762	4.01097	8.44494e-06	0.000207132	21.6	16.901	22.206	10.243	8.805	6.976
Nitab4.5_0007882g0010.1	-1.20864	10.4368	8.66874e-08	3.65959e-06	2159.19	1702.54	1811.23	662.29	832.186	980.249
Nitab4.5_0001078g0010.1	-1.20866	7.60723	0.000767612	0.00982671	232.999	324.716	235.136	172.893	102.808	71.597
Nitab4.5_0000209g0210.1	-1.20886	8.08394	3.92508e-08	1.80868e-06	382.317	332.353	392.066	179.029	180.264	124.274
Nitab4.5_0001242g0010.1	-1.21006	5.36303	3.76403e-05	0.00076562	62.017	45.763	55.39	33.961	19.429	17.925
Nitab4.5_0000069g0230.1	-1.21037	3.71411	0.0001415	0.00239645	18.298	15.909	13.586	10.34	5.242	5.446
Nitab4.5_0000143g0290.1	-1.21219	2.97296	0.00385349	0.0360083	11.208	8.262	6.881	2.252	3.516	5.658
Nitab4.5_0001101g0160.1	-1.21437	3.63277	0.00344404	0.032853	18.203	16.772	10.161	10.223	4.869	4.497
Nitab4.5_0000130g0220.1	-1.21523	5.71011	1.19962e-05	0.000281219	83.544	67.474	58.153	23.456	26.322	40.614
Nitab4.5_0000175g0060.1	-1.21825	2.90575	0.00461792	0.0410157	6.562	9.115	9.571	2.748	4.524	3.124
Nitab4.5_0002527g0080.1	-1.21837	3.87466	2.3651e-05	0.000514319	19.081	18.795	16.742	7.767	7.443	8.359
Nitab4.5_0000639g0220.1	-1.221	3.83809	5.38158e-05	0.00103901	13.282	20.838	18.781	8.087	6.977	7.594
Nitab4.5_0002546g0050.1	-1.2219	7.09774	1.27796e-05	0.000297851	163.595	215.902	178.225	102.408	84.321	54.649
Nitab4.5_0004728g0070.1	-1.224	4.0533	0.0019904	0.0212405	19.801	14.997	28.238	6.301	13.739	7.409
Nitab4.5_0000081g0200.1	-1.22462	4.02049	5.95828e-06	0.000151111	20.415	18.081	22.392	7.097	9.757	9.686
Nitab4.5_0001315g0240.1	-1.22463	6.25111	2.7975e-06	7.90089e-05	102.149	94.869	110.625	61.204	33.747	37.941
Nitab4.5_0000232g0130.1	-1.22468	3.80313	3.32541e-05	0.000689637	19.568	14.243	19.101	6.019	8.152	8.137
Nitab4.5_0003463g0030.1	-1.22719	4.86828	2.19942e-06	6.40024e-05	43.232	36.509	35.378	22.078	11.753	15.418
Nitab4.5_0000386g0090.1	-1.22752	3.98859	7.05208e-06	0.000176846	23.664	17.714	18.822	7.359	8.395	10.064
Nitab4.5_0002314g0110.1	-1.229	3.50143	0.000274602	0.00416077	17.251	10.246	13.969	4.951	5.69	7.004
Nitab4.5_0003062g0080.1	-1.23032	3.17805	0.00157146	0.0175803	9.26	9.432	13.772	5.689	3.526	4.497
Nitab4.5_0000377g0140.1	-1.23168	5.56008	8.61303e-10	6.0014e-08	60.79	71.144	56.973	27.689	25.585	27.592
Nitab4.5_0001494g0080.1	-1.23174	3.72608	7.95361e-05	0.00145602	14.287	16.96	18.087	7.223	7.798	6.497
Nitab4.5_0001332g0040.1	-1.23271	5.6194	2.09803e-09	1.28024e-07	73.447	66.919	57.263	29.903	29.867	24.975
Nitab4.5_0000437g0160.1	-1.23365	7.36104	5.20974e-07	1.82133e-05	244.302	243.019	184.992	103.145	112.826	72.445
Nitab4.5_0000008g0210.1	-1.2341	8.67932	2.87403e-05	0.000609847	635.266	410.916	636.856	171.543	279.183	270.896
Nitab4.5_0002354g0080.1	-1.23455	4.41086	3.64909e-06	9.92703e-05	23.463	25.768	32.367	11.573	14.476	9.041
Nitab4.5_0001324g0080.1	-1.23575	5.65549	4.55537e-08	2.06602e-06	74.781	59.55	68.707	36.155	24.634	25.924
Nitab4.5_0002612g0080.1	-1.23722	5.77845	0.00144499	0.0164024	79.66	73.197	68.666	53.029	22.041	20.634
Nitab4.5_0001824g0030.1	-1.2388	3.40391	0.00542863	0.0466565	8.773	16.623	12.117	2.592	5	8.276
Nitab4.5_0000337g0110.1	-1.24172	4.81972	3.91423e-06	0.000105375	40.534	36.142	34.457	12.534	22.657	12.275
Nitab4.5_0001540g0080.1	-1.24246	4.85503	3.42439e-05	0.000706488	39.317	33.445	41.555	8.786	20.045	19.731
Nitab4.5_0000076g0100.1	-1.24294	3.05946	0.00224309	0.0233552	11.218	8.302	9.489	3.951	4.44	3.235
Nitab4.5_0000294g0030.1	-1.2432	3.35824	0.000918815	0.0113175	14.256	10.96	11.227	9.243	3.153	2.995
Nitab4.5_0000141g0100.1	-1.24336	5.68221	4.59199e-09	2.63444e-07	69.172	63.378	74.688	36.029	25.24	26.928
Nitab4.5_0004506g0120.1	-1.24471	3.99888	4.95276e-06	0.000129862	18.775	21.116	20.933	8.971	8.469	8.497
Nitab4.5_0001035g0050.1	-1.24665	4.13421	0.000205187	0.00327146	28.109	24.24	15.501	11.573	9.841	7.078
Nitab4.5_0002836g0040.1	-1.24814	6.29646	8.24306e-08	3.50191e-06	104.541	94.908	119.938	34.233	48.195	53.046
Nitab4.5_0003187g0070.1	-1.24817	3.96531	5.85115e-06	0.000149334	16.129	22.435	20.312	8.184	7.453	8.958
Nitab4.5_0000903g0070.1	-1.24918	9.5928	4.45243e-10	3.30844e-08	902.533	1173.43	1104.96	506.271	437.042	408.487
Nitab4.5_0002170g0090.1	-1.24941	3.30618	0.000538913	0.00731766	15.875	9.879	10.368	5.136	4.654	5.465
Nitab4.5_0000564g0190.1	-1.24974	7.09747	5.92376e-06	0.000150615	208.404	172.222	180.77	106.66	55.452	75.901
Nitab4.5_0000106g0180.1	-1.25029	2.99462	0.00267881	0.0267045	8.943	10.523	7.916	4.243	2.295	4.949
Nitab4.5_0000836g0120.1	-1.25416	6.39376	1.33447e-12	1.4929e-10	114.298	109.409	119.11	52.767	47.431	44.623
Nitab4.5_0000790g0030.1	-1.25447	5.55576	1.58297e-07	6.22584e-06	63.764	59.331	66.441	35.592	25.408	19.768
Nitab4.5_0002050g0070.1	-1.25549	5.42417	5.32031e-05	0.00102916	58.155	64.935	49.689	14.049	26.705	32.375
Nitab4.5_0000504g0010.1	-1.25566	3.89864	8.15622e-06	0.000200295	17.97	18.151	20.281	10.66	4.626	8.764
Nitab4.5_0000218g0060.1	-1.25713	3.25325	0.00379341	0.0355128	15.684	9.055	9.623	7.039	1.726	5.078
Nitab4.5_0000496g0220.1	-1.2572	3.70062	6.65878e-05	0.00125083	18.722	14.868	15.438	7.718	5.242	6.93
Nitab4.5_0002187g0050.1	-1.25742	5.87475	3.33848e-08	1.56342e-06	89.502	83.631	64.516	38.815	32.367	28.873
Nitab4.5_0003620g0010.1	-1.25947	9.35433	2.05065e-08	1.03459e-06	948.56	910.373	845.626	468.378	377.868	294.378
Nitab4.5_0000104g0160.1	-1.25964	5.50846	1.1386e-07	4.62258e-06	63.171	70.509	49.937	30.864	21.481	24.597
Nitab4.5_0001789g0120.1	-1.26068	9.77395	1.22893e-08	6.41115e-07	1181.98	1131.13	1304.74	621.911	498.837	404.856
Nitab4.5_0000563g0210.1	-1.26128	6.23838	2.11965e-06	6.22208e-05	97.99	80.001	129.768	45.815	48.167	35.416
Nitab4.5_0000742g0180.1	-1.26139	3.65976	0.000173533	0.00284562	13.61	16.653	16.608	5.544	10.363	4.156
Nitab4.5_0000452g0070.1	-1.26201	8.71695	2.29687e-13	2.82024e-11	566.179	583.654	587.053	273.563	238.151	219.629
Nitab4.5_0009795g0010.1	-1.2652	5.7395	0.00037607	0.00543252	81.469	62.079	73.25	42.922	15.67	31.96
Nitab4.5_0001044g0060.1	-1.26541	5.8713	5.13006e-07	1.79659e-05	94.73	62.148	80.959	38.971	33.756	26.633
Nitab4.5_0000467g0120.1	-1.26573	6.26326	1.61755e-08	8.30935e-07	118.733	92.488	102.233	54.32	36.76	40.448
Nitab4.5_0000437g0150.1	-1.2672	6.04728	3.36391e-05	0.000694759	89.777	105.62	73.426	45.233	44.866	23.095
Nitab4.5_0000106g0400.1	-1.27057	4.08388	1.74298e-06	5.23076e-05	21.177	20.273	22.816	9.573	9.328	7.658
Nitab4.5_0006635g0050.1	-1.27117	3.37496	0.000682207	0.00888016	14.467	11.287	12.52	8.757	2.686	3.742
Nitab4.5_0001583g0190.1	-1.27209	4.41143	4.84081e-05	0.000951946	27.135	30.211	25.341	18	8.264	8.755
Nitab4.5_0002408g0040.1	-1.27518	4.3011	2.70419e-07	1.01028e-05	26.024	24.806	25.796	10.971	10.279	10.368
Nitab4.5_0002052g0080.1	-1.27619	5.2036	3.14139e-09	1.8389e-07	43.582	55.612	48.323	18.466	20.931	21.731
Nitab4.5_0000545g0040.1	-1.27811	2.78645	0.00454863	0.040619	7.768	8.391	7.078	3.437	2.966	3.364
Nitab4.5_0000245g0280.1	-1.27835	3.32293	0.000374264	0.0054142	13.938	11.218	11.113	4.039	4.477	5.76
Nitab4.5_0002114g0130.1	-1.27846	3.7133	2.67851e-05	0.000575636	17.187	15.84	16.804	5.379	6.968	8.064
Nitab4.5_0004701g0040.1	-1.28061	5.1464	3.55403e-05	0.000727312	42.47	56.366	43.594	15.019	28.477	15.409
Nitab4.5_0000837g0120.1	-1.28063	4.05298	0.000508502	0.00698003	27.4	15.681	21.088	4.981	9.449	11.704
Nitab4.5_0000055g0060.1	-1.28108	4.46571	2.36635e-07	8.99079e-06	26.966	32.8	26.676	13.592	8.982	13.178
Nitab4.5_0000338g0240.1	-1.28307	4.5631	0.000112161	0.0019521	25.855	34.099	33.495	6.019	16.09	16.035
Nitab4.5_0000605g0120.1	-1.2838	4.54373	1.73267e-07	6.80133e-06	29.897	29.259	32.336	17.272	9.439	11.031
Nitab4.5_0001505g0030.1	-1.28405	3.67173	0.00133064	0.0153563	14.552	19.589	12.852	6.816	2.808	9.769
Nitab4.5_0002314g0090.1	-1.28441	6.72874	6.98619e-10	4.98869e-08	157.213	131.011	148.021	68.961	48.401	63.45
Nitab4.5_0003796g0060.1	-1.28742	3.01775	0.00185022	0.0201163	12.594	7.498	8.268	4.437	3.582	3.613
Nitab4.5_0002354g0090.1	-1.28791	4.42006	4.85037e-08	2.17532e-06	29.972	26.135	27.928	13.777	11.65	9.17
Nitab4.5_0000257g0060.1	-1.2887	4.85034	7.9145e-08	3.39817e-06	38.205	32.939	44.204	13.01	18.571	15.759
Nitab4.5_0000246g0260.1	-1.28931	7.44539	0.00014163	0.00239664	280.454	195.996	244.738	57.291	110.597	129.094
Nitab4.5_0000202g0330.1	-1.28947	3.80334	0.000436115	0.0061309	23.717	17.793	11.548	7.563	6.026	8.064
Nitab4.5_0000949g0020.1	-1.28999	2.71001	0.00541742	0.0466386	6.435	7.26	7.761	3.437	2.397	2.802
Nitab4.5_0000302g0110.1	-1.29375	6.08326	0.000798884	0.0101529	73.638	137.855	65.789	47.466	41.396	25.343
Nitab4.5_0004063g0040.1	-1.29464	6.88813	6.27682e-14	8.20755e-12	175.607	157.741	155.554	69.767	65.134	65.275
Nitab4.5_0000295g0120.1	-1.29499	4.73022	2.81856e-06	7.94922e-05	29.728	32.215	43.014	11.175	15.017	17.141
Nitab4.5_0000076g0060.1	-1.29652	8.03511	6.02825e-07	2.07152e-05	377.83	332.194	379.328	202.825	121.277	123.73
Nitab4.5_0001223g0090.1	-1.29654	5.3344	1.5914e-05	0.000362512	43.169	55.106	64.889	15.233	29.466	22.431
Nitab4.5_0000767g0010.1	-1.29677	5.3782	4.19711e-09	2.42865e-07	53.604	54.65	60.202	28.65	17.872	23.104
Nitab4.5_0001076g0110.1	-1.29863	6.89217	4.08182e-09	2.38248e-07	176.697	142.953	171.209	61.01	57.98	81.688
Nitab4.5_0001106g0060.1	-1.29903	7.77339	5.52735e-09	3.10906e-07	354.325	242.354	311.707	117.844	115.027	139.314
Nitab4.5_0000846g0050.1	-1.30006	4.22889	3.0889e-07	1.13713e-05	26.257	26.036	21.243	11.777	7.667	10.607
Nitab4.5_0002031g0100.1	-1.30063	8.74979	2.84722e-14	4.0094e-12	665.089	562.191	564.589	248.31	233.776	252.161
Nitab4.5_0002521g0030.1	-1.30122	4.80178	2.09587e-05	0.000460749	31.506	36.39	43.646	15.68	20.679	9.059
Nitab4.5_0002105g0070.1	-1.30142	6.28743	3.81755e-12	3.92215e-10	111.578	101.018	108.752	50.34	39.316	41.065
Nitab4.5_0000294g0130.1	-1.30224	6.88471	2.84738e-11	2.52589e-09	170.855	144.778	173.144	66.437	74.938	58.17
Nitab4.5_0000185g0300.1	-1.30229	4.95524	2.08994e-08	1.04689e-06	47.54	38.771	38.348	20.243	13.329	17.104
Nitab4.5_0004506g0110.1	-1.30488	4.93748	9.19119e-10	6.33846e-08	44.068	38.731	40.096	13.214	18.748	17.851
Nitab4.5_0001057g0040.1	-1.30564	6.18306	1.00384e-09	6.76065e-08	110.002	98.955	89.961	35.01	49.93	37.093
Nitab4.5_0000131g0260.1	-1.30908	2.88469	0.00261243	0.0262377	10.869	5.802	8.547	4.379	3.171	2.949
Nitab4.5_0002823g0080.1	-1.30961	5.9408	0.000143624	0.00242224	79.956	67.147	104.923	32.233	49.156	21.869
Nitab4.5_0009314g0050.1	-1.31093	6.17562	3.40327e-07	1.24377e-05	101.429	85.407	110.48	28.019	47.123	45.655
Nitab4.5_0000294g0010.1	-1.31182	3.64598	4.96352e-05	0.000973228	13.113	19.142	14.714	8.049	5.942	4.543
Nitab4.5_0001794g0060.1	-1.31246	9.61212	4.14741e-16	8.39844e-14	1112.82	1055.37	1099.78	450.349	410.104	467.698
Nitab4.5_0000305g0190.1	-1.31247	7.05445	1.72149e-09	1.07993e-07	196.678	175.832	179.301	92.311	72.596	59.082
Nitab4.5_0004550g0060.1	-1.31515	6.34914	4.85158e-07	1.70601e-05	132.925	112.652	90.716	59.233	38.056	39.194
Nitab4.5_0000743g0020.1	-1.31555	5.99236	0.00171172	0.0188561	108.552	99.709	54.314	54.447	22.041	29.896
Nitab4.5_0003173g0030.1	-1.31674	4.78851	7.06443e-09	3.84477e-07	33.496	36.192	40.904	12.961	16.864	14.469
Nitab4.5_0002385g0020.1	-1.3173	3.45537	0.000127882	0.00218977	14.943	11.337	14.662	3.971	6.464	4.986
Nitab4.5_0000109g0550.1	-1.31906	7.67171	4.35616e-11	3.74872e-09	305.896	241.551	301.753	101.087	122.48	119.629
Nitab4.5_0006635g0060.1	-1.32095	5.31112	7.04167e-06	0.000176806	65.171	52.339	43.894	29.029	14.849	21.104
Nitab4.5_0001040g0040.1	-1.32202	2.81116	0.00309875	0.0300652	8.308	8.123	7.14	2.893	2.817	3.668
Nitab4.5_0001616g0120.1	-1.32202	2.81107	0.00309875	0.0300652	7.652	7.895	8.909	2.534	2.127	4.792
Nitab4.5_0007561g0010.1	-1.32262	4.08422	6.89802e-07	2.32672e-05	23.368	21.314	21.616	10.854	6.949	8.617
Nitab4.5_0000845g0230.1	-1.32275	7.62405	0.00035566	0.00518605	363.649	277.703	181.94	159.505	86.849	85.559
Nitab4.5_0002241g0040.1	-1.32312	7.86119	5.51321e-06	0.000141969	313.961	299.137	356.522	95.854	183.949	111.639
Nitab4.5_0004088g0030.1	-1.32328	6.3174	3.76154e-11	3.26878e-09	113.462	119.585	95.859	50.874	41.405	40.522
Nitab4.5_0000233g0080.1	-1.32361	3.03759	0.00127	0.0148084	7.376	10.285	10.886	4.466	2.509	4.47
Nitab4.5_0002222g0070.1	-1.32437	6.22935	1.1033e-08	5.8276e-07	87.184	113.753	109.269	51.213	36.163	37.342
Nitab4.5_0001098g0020.1	-1.32473	3.23388	0.000525201	0.00717015	12.245	12.319	9.985	4.097	4.104	4.976
Nitab4.5_0000917g0010.1	-1.32601	3.23477	0.000839057	0.0105403	15.282	9.442	9.375	4.35	3.255	6.138
Nitab4.5_0002577g0070.1	-1.32622	7.17124	8.67769e-05	0.00157284	195.069	151.116	253.534	109.66	52.999	78.988
Nitab4.5_0001453g0020.1	-1.32715	3.8283	6.3916e-06	0.000161287	19.939	16.375	17.943	9.019	5.065	7.741
Nitab4.5_0000556g0030.1	-1.32819	3.65877	0.00179291	0.0195791	13.663	23.298	10.803	8.136	5.139	5.428
Nitab4.5_0001462g0010.1	-1.32819	5.32863	3.67795e-05	0.000749624	41.285	71.114	50.672	15.951	28.831	20.993
Nitab4.5_0004905g0010.1	-1.33333	5.56742	2.13499e-08	1.06417e-06	58.366	70.807	64.858	19.582	25.483	32.836
Nitab4.5_0000245g0210.1	-1.33337	3.91138	2.20565e-06	6.40912e-05	18.912	18.408	20.591	10.65	7.145	6.156
Nitab4.5_0000132g0500.1	-1.33414	3.51641	7.47894e-05	0.00138042	13.652	12.676	16.877	3.961	6.203	6.7
Nitab4.5_0000021g0470.1	-1.33447	5.19778	1.05195e-06	3.3731e-05	65.425	43.849	40.779	18.942	21.882	19.187
Nitab4.5_0000051g0310.1	-1.33504	3.17705	0.000621334	0.00822603	10.393	12.418	9.209	2.485	3.871	6.11
Nitab4.5_0000078g0010.1	-1.33505	3.17859	0.000425029	0.00600197	12.594	7.786	12.075	3.262	3.74	5.732
Nitab4.5_0001056g0050.1	-1.3351	4.86262	1.10252e-09	7.3031e-08	41.539	39.406	35.771	18.485	13.161	15.317
Nitab4.5_0004186g0040.1	-1.33673	2.73544	0.00366964	0.0345791	4.868	8.956	8.04	2.505	3.246	2.322
Nitab4.5_0005082g0030.1	-1.33793	6.471	2.79264e-13	3.36739e-11	119.823	113.585	134.952	48.98	48.205	49.359
Nitab4.5_0001582g0100.1	-1.33942	6.85791	6.66706e-08	2.90594e-06	176.728	163.285	143.209	84.01	49.361	59.524
Nitab4.5_0000565g0170.1	-1.34171	7.03718	4.73074e-14	6.35086e-12	172.061	183.975	191.056	72.66	78.79	66.141
Nitab4.5_0000163g0170.1	-1.34233	4.25811	4.52766e-07	1.61084e-05	30.564	22.772	22.423	11.524	9.421	8.368
Nitab4.5_0002635g0070.1	-1.34306	7.33957	1.178e-10	9.48854e-09	252.536	202.096	222.16	105.621	87.735	76.076
Nitab4.5_0000006g0110.1	-1.34315	5.14066	4.54702e-05	0.00089856	47.751	33.702	62.281	18.369	24.196	14.211
Nitab4.5_0000845g0180.1	-1.34327	3.47234	0.000283498	0.00427306	16.891	9.581	14.559	7.845	3.918	4.488
Nitab4.5_0000828g0010.1	-1.34427	3.30595	0.000218031	0.00345164	14.51	12.378	8.454	5.757	3.461	5.299
Nitab4.5_0006318g0010.1	-1.3449	3.95724	1.29606e-06	4.01519e-05	21.346	17.992	20.385	10.427	7.956	5.382
Nitab4.5_0000057g0040.1	-1.34503	3.47206	0.000599866	0.00799437	17.42	8.371	15.914	5.252	4.533	5.907
Nitab4.5_0000960g0070.1	-1.34616	3.83892	4.39646e-06	0.000116489	17.706	19.737	17.508	5.718	6.651	9.299
Nitab4.5_0005223g0040.1	-1.34638	3.11986	0.000734248	0.00947792	9.44	10.533	10.554	4.505	4.002	3.677
Nitab4.5_0000494g0050.1	-1.34697	4.96745	1.17235e-07	4.74048e-06	52.059	37.233	37.313	19.146	15.008	15.418
Nitab4.5_0000171g0190.1	-1.34699	6.25734	2.67287e-06	7.61295e-05	142.28	92.131	82.883	45.126	34.092	46.447
Nitab4.5_0004904g0010.1	-1.34787	10.2362	4.89673e-16	9.6672e-14	1875.15	1612.27	1589.88	691.135	653.507	668.195
Nitab4.5_0000440g0090.1	-1.34821	3.577	0.000297666	0.00445989	16.298	14.917	13.804	10.583	3.684	4.184
Nitab4.5_0000110g0080.1	-1.35187	3.42417	0.000103625	0.00182563	15.811	11.932	12.396	6.126	5.69	4
Nitab4.5_0001331g0020.1	-1.35246	4.70366	4.09759e-09	2.38477e-07	33.157	38.662	32.326	10.845	13.497	16.183
Nitab4.5_0002255g0080.1	-1.35247	4.77125	9.51705e-08	3.95144e-06	45.053	33.316	31.56	14.893	14.971	13.879
Nitab4.5_0000062g0070.1	-1.35365	2.65604	0.00433664	0.0392304	6.657	8.639	6.105	2.806	2.481	2.35
Nitab4.5_0001816g0010.1	-1.35366	2.656	0.00433664	0.0392304	6.339	6.933	7.191	1.738	3.722	3.152
Nitab4.5_0000108g0440.1	-1.35464	6.00209	2.35847e-07	8.99079e-06	93.28	82.57	89.268	34.214	23.785	46.42
Nitab4.5_0000256g0190.1	-1.35775	6.4837	0.00113681	0.0135135	175.3	66.056	132.334	58.67	32.348	55.423
Nitab4.5_0000140g0220.1	-1.35907	4.44625	0.00553174	0.0472779	29.834	24.3	33.288	21.806	5.41	7.492
Nitab4.5_0000114g0080.1	-1.36148	6.45854	2.94567e-06	8.23847e-05	153.424	103.051	110.49	65.146	39.885	38.586
Nitab4.5_0000500g0050.1	-1.36629	9.45342	5.03802e-17	1.20775e-14	997.02	987.845	973.438	376.922	421.559	359.938
Nitab4.5_0000238g0090.1	-1.36719	8.6746	9.34627e-13	1.05734e-10	604.532	548.533	570.135	187.679	233.655	251.598
Nitab4.5_0000084g0220.1	-1.36815	3.48814	0.000325048	0.00480228	18.214	10.454	12.686	6.223	7.014	3.41
Nitab4.5_0000836g0080.1	-1.36822	7.31484	4.41586e-05	0.000876944	178.485	259.473	230.138	121.757	84.918	54.539
Nitab4.5_0000978g0170.1	-1.36894	3.93482	0.000879643	0.0109409	25.336	18.22	16.07	5.883	12.947	4.829
Nitab4.5_0001499g0110.1	-1.37011	6.76725	7.25641e-10	5.16333e-08	168.685	134.215	154.012	49.582	72.83	56.041
Nitab4.5_0001542g0060.1	-1.37023	6.02968	0.00102607	0.012365	87.565	132.737	51.592	25.291	33.178	47.231
Nitab4.5_0000116g0370.1	-1.37086	4.60148	1.00927e-06	3.25699e-05	27.199	34.278	35.368	16.65	8.292	13.4
Nitab4.5_0001858g0010.1	-1.37185	6.00078	2.43811e-10	1.89561e-08	99.778	91.02	75.712	41.262	30.343	31.914
Nitab4.5_0000009g0480.1	-1.37263	3.32219	0.000142897	0.00241606	11.927	14.362	10.917	3.738	3.843	6.516
Nitab4.5_0001645g0050.1	-1.37339	7.23963	8.09827e-08	3.44767e-06	195.514	274.529	165.622	91.874	78.594	77.504
Nitab4.5_0003913g0010.1	-1.37512	5.05258	0.00140293	0.0160516	53.36	35.676	45.995	18.184	7.415	26.707
Nitab4.5_0005160g0040.1	-1.37667	3.687	1.4991e-05	0.000343429	16.467	16.643	15.894	5.427	6.156	7.078
Nitab4.5_0001748g0050.1	-1.37794	3.93505	0.00368738	0.0346975	25.58	11.237	23.313	8.631	3.265	11.345
Nitab4.5_0003412g0020.1	-1.37927	3.13963	0.00050027	0.00689524	10.626	11.099	10.161	4.35	4.011	4.193
Nitab4.5_0002486g0040.1	-1.37952	9.94172	6.78193e-12	6.66184e-10	1580.27	1170.78	1412.85	512.038	504.994	597.382
Nitab4.5_0001075g0020.1	-1.3814	3.77854	0.000880748	0.0109419	23.95	18.716	9.861	7.903	4.785	8.156
Nitab4.5_0000622g0170.1	-1.38414	7.0265	4.12812e-08	1.89357e-06	195.016	175.673	177.863	56.068	95.691	60.52
Nitab4.5_0000013g0220.1	-1.38434	3.27159	0.00341362	0.0326401	16.806	11.753	6.643	6.175	3.386	3.825
Nitab4.5_0000863g0190.1	-1.38557	3.64593	1.75674e-05	0.000395699	14.435	16.722	16.504	6.738	3.19	7.631
Nitab4.5_0001937g0020.1	-1.38868	3.73905	4.77385e-06	0.000125432	15.642	19.856	15.532	3.981	8.134	7.538
Nitab4.5_0001945g0050.1	-1.38881	5.06872	5.81493e-12	5.79951e-10	46.587	43.908	46.646	19.825	16.034	16.22
Nitab4.5_0000677g0130.1	-1.39205	8.13047	5.99192e-09	3.32395e-07	461.363	389.582	335.093	189.514	139.512	127.407
Nitab4.5_0002512g0050.1	-1.39476	4.22995	4.60845e-08	2.07607e-06	26.447	24.707	23.023	9.786	9.85	9.05
Nitab4.5_0001727g0170.1	-1.39536	5.36472	3.59214e-07	1.30568e-05	66.251	49.215	54.873	29.796	19.83	15.501
Nitab4.5_0001160g0130.1	-1.39805	8.50925	4.57126e-18	1.22735e-15	508.109	504.853	531.343	195.068	208.303	188.019
Nitab4.5_0000443g0140.1	-1.39983	3.7909	2.78853e-06	7.88699e-05	17.759	17.575	18.201	4.447	9.309	6.34
Nitab4.5_0000489g0090.1	-1.40179	5.80098	2.66644e-08	1.28148e-06	77.352	61.93	92.9	24.835	34.95	28.615
Nitab4.5_0003272g0010.1	-1.40198	2.68393	0.00289659	0.0284391	7.736	6.13	7.74	2.728	2.845	2.461
Nitab4.5_0000412g0020.1	-1.40449	4.38609	1.46457e-07	5.79411e-06	22.098	29.596	31.922	10.097	9.579	11.695
Nitab4.5_0000936g0060.1	-1.40568	6.15877	3.78742e-06	0.00010251	105.673	94.849	98.88	54.951	24.158	35.453
Nitab4.5_0000097g0050.1	-1.40573	6.71058	3.71979e-12	3.8611e-10	169.839	143.627	127.926	59.845	57.831	50.557
Nitab4.5_0000026g0280.1	-1.40574	6.0361	1.96053e-06	5.8229e-05	113.875	74.328	87.188	47.747	27.945	29.076
Nitab4.5_0000795g0070.1	-1.40807	6.24477	2.9955e-08	1.41591e-06	111.176	97.448	109.476	27.048	50.434	43.332
Nitab4.5_0000018g0150.1	-1.40969	5.2945	6.05614e-07	2.07402e-05	68.918	42.907	50.371	19.883	16.482	25.15
Nitab4.5_0001800g0070.1	-1.41063	10.3323	6.45003e-09	3.55802e-07	2011.22	1899.16	1582.9	847.775	716.347	521.905
Nitab4.5_0000190g0080.1	-1.4119	3.88799	0.000754818	0.00968755	16.806	24.518	15.759	10.485	8.637	2.912
Nitab4.5_0000078g0080.1	-1.41334	3.28851	0.000113266	0.00196794	13.07	12.289	10.865	4.33	4.272	5.483
Nitab4.5_0002322g0160.1	-1.41368	4.81577	3.52946e-05	0.000723019	48.482	40.1	26.365	20.379	11.986	11.298
Nitab4.5_0000213g0080.1	-1.4161	3.51674	3.33949e-05	0.000691845	10.88	15.155	16.277	5.146	7.723	3.723
Nitab4.5_0001612g0070.1	-1.41739	6.60337	7.35181e-07	2.45919e-05	146.556	126.151	137.921	74.281	43.205	37.969
Nitab4.5_0000080g0160.1	-1.41751	6.77753	4.85726e-09	2.74749e-07	151.308	147.327	164.266	77.942	47.841	49.958
Nitab4.5_0002126g0080.1	-1.41888	7.1668	2.59184e-09	1.55797e-07	244.217	161.093	203.731	89.534	69.686	70.685
Nitab4.5_0000677g0040.1	-1.41944	9.04677	1.11973e-09	7.34463e-08	771.397	866.872	615.933	343.805	256.135	250.778
Nitab4.5_0000302g0200.1	-1.41997	6.2005	1.19658e-09	7.79792e-08	114.468	115.38	79.696	42.544	38.625	35.149
Nitab4.5_0003265g0130.1	-1.42431	5.03856	9.4195e-09	5.03131e-07	53.223	36.668	45.622	18.272	14.71	17.611
Nitab4.5_0000649g0090.1	-1.42483	2.78643	0.00245364	0.0249919	5.704	11.049	6.529	3.534	3.563	2.193
Nitab4.5_0002826g0060.1	-1.42567	5.93288	6.52318e-07	2.21513e-05	86.475	69.299	100.764	41.155	21.491	33.425
Nitab4.5_0001926g0040.1	-1.42593	2.78766	0.00164793	0.0183035	10.065	7.568	6.095	3.777	2.444	2.626
Nitab4.5_0006360g0020.1	-1.42619	7.03478	5.00111e-06	0.000130789	168.918	176.903	209.226	46.942	61.534	99.991
Nitab4.5_0000145g0180.1	-1.42655	5.53545	4.34135e-07	1.55279e-05	62.049	48.084	83.339	24.214	26.388	21.417
Nitab4.5_0000316g0100.1	-1.42703	3.10014	0.000396558	0.00566347	8.223	12.557	9.809	4.65	4.44	2.203
Nitab4.5_0001204g0100.1	-1.42704	3.10129	0.000822195	0.0103868	13.917	9.978	7.171	4.67	3.843	2.387
Nitab4.5_0006179g0040.1	-1.42704	3.09945	0.000396558	0.00566347	9.546	12.715	8.878	4.078	2.724	4.442
Nitab4.5_0000222g0350.1	-1.42717	6.18709	3.76828e-10	2.83141e-08	98.551	89.265	118.675	41.864	30.967	42.743
Nitab4.5_0004646g0070.1	-1.42842	4.34652	1.24855e-05	0.000291672	34.702	27.226	19.815	12.097	11.464	7.4
Nitab4.5_0000143g0260.1	-1.42871	4.39296	0.00498222	0.0436394	28.606	28.872	26.355	5.398	5.419	20.468
Nitab4.5_0001671g0110.1	-1.42961	6.2379	0.00021999	0.00347148	109.441	79.148	129.985	22.194	37.926	58.391
Nitab4.5_0001454g0060.1	-1.4297	7.42534	9.39519e-14	1.21276e-11	248.292	250.527	232.135	106.903	79.844	87.236
Nitab4.5_0002077g0150.1	-1.43039	8.0121	1.18367e-09	7.73883e-08	367.967	376.272	355.446	179.815	113.973	118.44
Nitab4.5_0000203g0030.1	-1.43516	4.59558	2.35248e-09	1.42687e-07	31.485	29.715	37.437	13.505	10.307	13.04
Nitab4.5_0002367g0100.1	-1.43535	6.64128	5.75713e-10	4.20041e-08	119.452	136.04	166.646	57.874	43.849	56.723
Nitab4.5_0000569g0110.1	-1.4392	7.13779	1.04117e-13	1.33542e-11	209.78	191.959	197.181	69.417	87.754	65.782
Nitab4.5_0007310g0020.1	-1.44043	9.34397	1.74045e-06	5.23076e-05	1192.59	629.883	959.8	303.524	308.089	421.905
Nitab4.5_0003030g0080.1	-1.44052	4.85198	8.92908e-08	3.75376e-06	48.005	35.825	34.778	10.845	18.599	14.736
Nitab4.5_0003212g0020.1	-1.44101	6.86408	5.43818e-08	2.41209e-06	178.93	161.748	154.819	83.087	44.213	56.566
Nitab4.5_0000116g0330.1	-1.44199	8.36032	2.37612e-08	1.15854e-06	526.312	388.858	489.746	226.932	143.355	152.253
Nitab4.5_0001584g0050.1	-1.44241	4.29396	2.13133e-08	1.06417e-06	27.019	25.728	26.665	14.155	5.932	9.17
Nitab4.5_0000300g0210.1	-1.4427	5.5184	1.19903e-10	9.61949e-09	73.384	63.953	53.9	21.039	23.338	26.707
Nitab4.5_0001833g0020.1	-1.44372	5.1585	3.86218e-13	4.60193e-11	47.677	51.962	48.592	18.058	19.765	17.279
Nitab4.5_0001781g0060.1	-1.44483	6.59292	1.94536e-14	2.83868e-12	139.825	128.105	141.429	47.165	58.335	45.774
Nitab4.5_0000058g0170.1	-1.44528	4.65292	4.91223e-10	3.61013e-08	38.449	29.338	34.674	13.65	12.135	11.538
Nitab4.5_0001540g0040.1	-1.44624	2.88427	0.000940595	0.0115071	8.869	7.746	9.24	3.408	3.171	2.885
Nitab4.5_0004625g0010.1	-1.44624	2.88471	0.000940595	0.0115071	11.483	7.726	7.347	4.602	1.763	2.709
Nitab4.5_0000993g0110.1	-1.44857	8.2126	2.0219e-07	7.79981e-06	455.765	372.969	440.595	217.203	122.769	129.785
Nitab4.5_0000151g0410.1	-1.44962	4.19326	0.00221419	0.0231421	34.512	16.187	22.858	3.951	8.255	14.34
Nitab4.5_0000249g0080.1	-1.44996	7.00635	2.27039e-10	1.77205e-08	187.28	206.847	153.908	81.223	65.274	55.709
Nitab4.5_0002828g0140.1	-1.45081	3.59109	1.10595e-05	0.000262005	18.267	14.808	13.234	5.447	5.251	5.686
Nitab4.5_0004657g0030.1	-1.45252	3.48721	2.20777e-05	0.000481666	17.663	11.803	13.059	3.816	5.158	5.741
Nitab4.5_0001219g0050.1	-1.45253	7.95143	1.99758e-06	5.91548e-05	395.769	324.498	339.045	184.815	119.29	86.996
Nitab4.5_0003298g0070.1	-1.45331	7.99027	5.82993e-09	3.26104e-07	448.473	343.987	296.672	157.728	135.781	108.054
Nitab4.5_0000173g0200.1	-1.45357	4.42081	1.03175e-09	6.92545e-08	31.464	28.783	26.458	12.447	10.372	8.921
Nitab4.5_0000026g0430.1	-1.45402	5.18363	5.81765e-12	5.79951e-10	54.948	50.445	45.436	21.466	17.321	16.929
Nitab4.5_0001383g0040.1	-1.45865	6.10726	3.94646e-10	2.95427e-08	95.45	81.033	114.64	33.175	41.871	32.347
Nitab4.5_0000104g0240.1	-1.45926	5.34504	3.53891e-11	3.0984e-09	57.848	56.118	55.525	20.01	15.726	26.136
Nitab4.5_0000898g0030.1	-1.45968	3.25342	0.000533742	0.00728182	14.457	8.371	12.665	1.544	5.811	5.253
Nitab4.5_0001928g0020.1	-1.46053	5.79122	0.00119224	0.0140892	104.562	65.719	63.43	11.864	34.913	38.918
Nitab4.5_0000489g0120.1	-1.46057	4.8473	4.75735e-07	1.68068e-05	42.925	32.899	42.818	20.699	10.102	12.773
Nitab4.5_0001650g0130.1	-1.4615	4.17295	0.000107577	0.00188537	31.273	26.115	15.459	6.107	7.966	11.557
Nitab4.5_0000256g0130.1	-1.46183	5.62382	7.45013e-08	3.21249e-06	90.052	53.301	64.558	23.612	28.72	23.694
Nitab4.5_0001991g0020.1	-1.46226	6.0437	2.21155e-13	2.73215e-11	102.509	92.597	84.384	29.01	34.568	38.052
Nitab4.5_0001366g0020.1	-1.46261	5.73426	1.3974e-14	2.09995e-12	77.765	72.592	73.757	31.281	27.143	23.565
Nitab4.5_0002297g0080.1	-1.46265	5.8846	2.09877e-06	6.17879e-05	65.933	73.683	109.197	21.165	36.349	33.416
Nitab4.5_0003937g0040.1	-1.46368	2.97436	0.000538373	0.00731526	8.572	9.789	9.396	2.942	4.822	2.949
Nitab4.5_0000038g0160.1	-1.46371	5.48705	0.00045352	0.00634204	81.215	61.98	45.229	37.796	16.109	15.289
Nitab4.5_0001454g0020.1	-1.46411	4.48448	9.6551e-10	6.59067e-08	34.3	29.775	27.7	13.194	10.008	9.741
Nitab4.5_0001416g0040.1	-1.4645	4.21125	1.32348e-08	6.88656e-07	26.331	24.221	24.254	5.971	10.279	10.653
Nitab4.5_0003074g0030.1	-1.46497	10.7769	1.13755e-14	1.76206e-12	2196.51	2451.11	2897.45	893.251	931.86	935.497
Nitab4.5_0007718g0030.1	-1.46607	7.108	6.2647e-13	7.2087e-11	197.609	182.944	208.708	62.913	86.606	65.763
Nitab4.5_0000108g0090.1	-1.46611	3.44005	2.55893e-05	0.000552666	17.314	13.419	10.813	4.845	4.468	4.976
Nitab4.5_0001217g0030.1	-1.4687	5.40175	8.54166e-05	0.00155098	62.028	57.199	57.925	33.718	10.783	19.731
Nitab4.5_0002816g0080.1	-1.46936	4.74063	1.47998e-08	7.66127e-07	44.756	30.191	35.585	12.874	15.325	12.1
Nitab4.5_0003381g0020.1	-1.47058	4.31133	1.13439e-06	3.59169e-05	34.173	25.123	20.871	7.748	9.925	11.04
Nitab4.5_0001834g0020.1	-1.47166	4.74636	1.70486e-05	0.000384874	32.861	39.088	38.751	21.388	10.521	8.488
Nitab4.5_0000430g0020.1	-1.47496	11.7453	3.69846e-17	9.08243e-15	5352.22	4826.27	4630.93	1991.15	1659.64	1726.04
Nitab4.5_0001334g0020.1	-1.47569	2.6293	0.0030149	0.0293858	7.959	5.802	7.119	0.33	4.888	2.746
Nitab4.5_0006988g0020.1	-1.47738	4.00926	0.000837843	0.0105316	15.367	32.939	15.118	9.922	7.705	5.658
Nitab4.5_0001239g0110.1	-1.47856	4.69919	1.99012e-06	5.90206e-05	36.967	37.709	31.994	8.641	19.84	10.248
Nitab4.5_0000618g0040.1	-1.47975	4.15517	9.61438e-07	3.11262e-05	20.33	22.386	29.035	11.67	7.714	6.414
Nitab4.5_0000287g0280.1	-1.48029	6.44379	1.13945e-06	3.60206e-05	175.3	104.886	91.575	48.466	45.407	39.738
Nitab4.5_0002909g0010.1	-1.4812	6.08228	9.27356e-08	3.8583e-06	89.915	91.07	107.179	48.68	30.361	25.011
Nitab4.5_0001006g0040.1	-1.48346	9.31052	1.40166e-07	5.57811e-06	771.916	793.198	1170.93	272.339	417.884	297.594
Nitab4.5_0001751g0160.1	-1.48434	2.4195	0.00456191	0.0406295	6.181	5.495	5.981	1.689	1.399	3.004
Nitab4.5_0000008g0870.1	-1.48504	9.60483	2.13599e-09	1.29947e-07	1280.13	1176.36	905.869	507.038	340.549	364.592
Nitab4.5_0000391g0260.1	-1.48749	6.17991	0.000101412	0.0017945	113.61	108.695	86.381	27.728	22.992	59.598
Nitab4.5_0000315g0120.1	-1.48805	9.43599	3.10037e-14	4.30566e-12	1106.14	879.091	1006.45	347.291	408.976	319.841
Nitab4.5_0002732g0020.1	-1.48918	4.44557	1.00185e-09	6.76065e-08	34.3	27.216	27.317	11.408	11.38	9.207
Nitab4.5_0001439g0100.1	-1.48923	9.72405	0.000469667	0.00654058	1585.53	995.701	1075.92	508.232	208.946	595.041
Nitab4.5_0000043g0340.1	-1.49102	7.30867	7.72529e-11	6.37558e-09	267.172	176.903	237.712	85.796	84.377	74.233
Nitab4.5_0000534g0060.1	-1.49134	3.45496	0.000930021	0.0114125	9.197	13.697	19.319	2.728	7.145	5.317
Nitab4.5_0001217g0020.1	-1.49312	4.05462	1.76961e-07	6.93281e-06	26.754	20.551	19.37	9.388	5.606	8.23
Nitab4.5_0000297g0050.1	-1.49681	6.44779	1.21903e-05	0.000285437	135.412	116.649	121.655	68.301	39.157	27.039
Nitab4.5_0003721g0020.1	-1.49887	6.33718	0.00167298	0.0185128	87.184	187.476	70.466	57.417	40.612	24.753
Nitab4.5_0001691g0080.1	-1.49902	4.99488	1.43024e-11	1.34583e-09	46.513	40.526	46.222	12.796	17.256	17.667
Nitab4.5_0000723g0200.1	-1.50441	2.54185	0.0052414	0.0454744	4.413	9.879	4.894	1.621	3.041	2.387
Nitab4.5_0004107g0020.1	-1.50531	3.21803	0.00030005	0.0044811	15.303	7.746	11.434	3.641	5.541	3.023
Nitab4.5_0002368g0040.1	-1.50553	6.3848	1.48522e-09	9.40499e-08	104.403	145.522	107.427	40.612	34.643	51.018
Nitab4.5_0003097g0010.1	-1.50587	2.54331	0.00257064	0.0259681	5.778	6.457	7.336	2.214	2.416	1.696
Nitab4.5_0004770g0030.1	-1.50732	2.54412	0.00402312	0.0370548	8.583	3.243	7.129	1.592	3.003	2.497
Nitab4.5_0000045g0280.1	-1.50737	4.9621	3.32555e-12	3.52456e-10	43.137	44.722	42.549	19.417	12.779	14.008
Nitab4.5_0000008g0860.1	-1.50767	9.73426	1.09884e-09	7.30276e-08	1364.05	1326.28	1003.51	553.077	372.067	386.36
Nitab4.5_0001751g0070.1	-1.50835	4.06316	2.63096e-08	1.26745e-06	20.097	24.984	22.175	7.039	6.93	9.584
Nitab4.5_0000723g0210.1	-1.50893	6.01253	1.86937e-15	3.24514e-13	92.931	95.97	86.463	32.66	36.443	28.477
Nitab4.5_0004296g0040.1	-1.5093	5.80195	6.04742e-12	5.96945e-10	90.677	77.065	70.249	33.466	23.841	27.214
Nitab4.5_0003062g0010.1	-1.51054	5.2394	2.49684e-11	2.24459e-09	50.873	55.305	52.596	22.476	12.872	21.187
Nitab4.5_0000110g0540.1	-1.51172	6.71546	2.10174e-14	3.02305e-12	176.284	137.537	138.656	53.961	53.148	52.272
Nitab4.5_0000652g0100.1	-1.51936	5.1366	0.00239163	0.024559	41.761	25.768	79.8	10.116	21.397	20.579
Nitab4.5_0000037g0180.1	-1.51979	9.28818	1.34276e-08	6.96887e-07	1043.54	850.338	821.982	249.106	425.439	280.849
Nitab4.5_0000681g0160.1	-1.51984	4.95417	3.0039e-05	0.000634062	28.575	58.796	42.797	17.816	17.209	10.755
Nitab4.5_0003465g0090.1	-1.52637	5.26855	3.24322e-12	3.45549e-10	54.789	47.172	60.771	20.408	19.495	16.791
Nitab4.5_0000283g0380.1	-1.52765	6.69674	3.05311e-18	8.65923e-16	156.98	138.678	151.508	54.165	51.357	51.47
Nitab4.5_0004924g0030.1	-1.52931	7.06297	2.11417e-06	6.21505e-05	238.746	147.089	192.359	90.126	44.856	67.137
Nitab4.5_0000396g0170.1	-1.53122	5.31199	0.000248825	0.00383366	48.661	67.524	51.241	23.99	26.556	7.557
Nitab4.5_0000785g0120.1	-1.53481	4.87552	2.47102e-12	2.68967e-10	37.094	42.431	43.201	13.932	15.362	13.169
Nitab4.5_0002944g0110.1	-1.53519	3.01776	0.000235936	0.00366876	8.329	9.789	11.682	3.311	3.554	3.06
Nitab4.5_0001856g0060.1	-1.53792	2.76326	0.0008276	0.0104289	10.943	6.05	6.312	3.233	2.052	2.848
Nitab4.5_0000307g0080.1	-1.53997	4.69364	7.11036e-13	8.1353e-11	37.242	34.208	36.382	14.107	11.118	12.755
Nitab4.5_0000256g0270.1	-1.54163	5.70161	0.000564131	0.00760369	101.514	39.217	81.786	28.233	15.185	33.748
Nitab4.5_0001056g0040.1	-1.5447	6.78359	2.52894e-08	1.22712e-06	174.94	186.792	114.795	68.097	47.048	50.051
Nitab4.5_0001953g0110.1	-1.54559	8.60287	3.99284e-14	5.46964e-12	496.446	590.557	605.679	228.31	184.564	172.859
Nitab4.5_0000188g0210.1	-1.54659	5.84087	8.08408e-12	7.90239e-10	82.919	93.45	68.852	32.349	27.927	24.21
Nitab4.5_0000913g0050.1	-1.55232	3.93703	2.04974e-05	0.000452088	26.797	15.899	18.553	10.738	5.923	4.285
Nitab4.5_0001047g0070.1	-1.55339	7.03695	1.47083e-09	9.34326e-08	225.644	193.774	151.073	50.233	72.531	73.689
Nitab4.5_0000200g0210.1	-1.5535	3.17936	0.0046749	0.0412707	13.515	12.071	8.361	1.456	7.938	1.797
Nitab4.5_0004657g0020.1	-1.55473	5.67871	1.89252e-13	2.36706e-11	84.411	69.676	64.868	25.534	26.397	23.178
Nitab4.5_0000603g0060.1	-1.55701	5.41759	8.89187e-10	6.15311e-08	61.086	63.834	56.952	27.573	13.749	21.067
Nitab4.5_0000091g0010.1	-1.55766	2.57319	0.00166338	0.0184446	8.848	6.586	5.174	2.961	1.8	2
Nitab4.5_0000021g0040.1	-1.55876	7.24593	9.83145e-09	5.22364e-07	243.53	225.949	190.869	103.427	59.958	63.192
Nitab4.5_0000856g0110.1	-1.55948	6.12857	4.85446e-07	1.70601e-05	86.761	87.837	126.405	34.903	45.518	22.689
Nitab4.5_0002827g0030.1	-1.56007	4.64104	0.00179084	0.0195671	33.623	33.693	36.972	19.786	12.574	3.539
Nitab4.5_0002278g0060.1	-1.56062	2.95235	0.000270125	0.0041146	7.969	8.728	11.372	2.019	3.619	4.119
Nitab4.5_0000101g0120.1	-1.56159	4.80306	0.00218129	0.0229491	43.56	39.862	32.957	18.544	3.516	17.408
Nitab4.5_0000859g0240.1	-1.5659	4.46895	3.30225e-11	2.91655e-09	31.294	31.243	29.801	12.65	7.947	10.736
Nitab4.5_0000007g0320.1	-1.56711	8.77391	7.78913e-21	3.07548e-18	638.314	647.101	629.53	240.99	209.833	201.787
Nitab4.5_0001225g0210.1	-1.56894	3.94589	2.90664e-08	1.38045e-06	19.568	22.971	19.288	9	6.044	6.11
Nitab4.5_0004028g0080.1	-1.56966	3.03829	0.000154938	0.00258065	10.7	11.862	8.123	3	3.031	4.811
Nitab4.5_0000344g0120.1	-1.57015	2.6842	0.000944338	0.0115389	7.736	5.604	9.313	1.417	3.013	3.06
Nitab4.5_0000652g0020.1	-1.57255	5.19487	1.51632e-07	5.97536e-06	68.42	42.877	44.825	13.408	18.067	21.196
Nitab4.5_0000264g0080.1	-1.57362	3.81626	2.94369e-07	1.08965e-05	16.319	22.624	17.58	7.903	5.858	5.253
Nitab4.5_0000343g0280.1	-1.57463	5.39944	2.09524e-10	1.64403e-08	73.881	50.028	56.052	21.505	21.304	18.496
Nitab4.5_0003757g0060.1	-1.57646	5.7063	4.40976e-12	4.50758e-10	79.046	60.71	85.17	25.214	25.035	25.574
Nitab4.5_0000194g0120.1	-1.58068	6.65648	0.000352912	0.00515718	160.335	99.441	178.97	22.854	55.126	69.45
Nitab4.5_0002614g0020.1	-1.58092	5.87331	1.13291e-11	1.07611e-09	88.782	93.024	70.725	26.544	23.645	34.522
Nitab4.5_0000787g0270.1	-1.58443	5.37938	2.35527e-06	6.79486e-05	67.034	51.268	59.746	30.913	14.989	13.842
Nitab4.5_0001936g0080.1	-1.58449	3.19822	5.12975e-05	0.000999011	12.393	13.687	8.971	5.864	2.808	3.05
Nitab4.5_0000536g0010.1	-1.58668	3.51725	3.32592e-06	9.14945e-05	13.737	14.739	15.707	2.757	6.212	6.156
Nitab4.5_0000383g0190.1	-1.58879	6.61333	8.08203e-08	3.44767e-06	134.512	147.049	144.327	63.408	28.654	51.424
Nitab4.5_0000249g0250.1	-1.58912	5.33002	1.05791e-10	8.58993e-09	65.436	61.662	45.456	21.951	16.715	18.044
Nitab4.5_0000005g0020.1	-1.58929	2.88348	0.000307534	0.00458388	6.614	10.97	8.588	2.825	3.554	2.765
Nitab4.5_0000129g0330.1	-1.59112	5.42658	2.89998e-16	6.083e-14	61.234	59.569	63.937	21.262	21.64	18.588
Nitab4.5_0000312g0110.1	-1.59149	6.08652	1.06905e-09	7.12829e-08	104.773	87.857	101.488	24.155	29.074	44.512
Nitab4.5_0000707g0200.1	-1.59191	3.82878	1.95306e-07	7.56321e-06	15.314	21.681	19.257	8	5.708	5.124
Nitab4.5_0000980g0100.1	-1.59579	5.46169	2.07048e-09	1.27114e-07	67.468	73.683	47.805	25.165	20.651	17.694
Nitab4.5_0000588g0280.1	-1.59771	7.98584	2.80019e-08	1.33937e-06	346.959	412.335	353.418	144.31	79.088	147.525
Nitab4.5_0004850g0010.1	-1.59778	7.13814	2.43263e-13	2.96884e-11	223.781	190.343	202.966	69.786	53.652	81.633
Nitab4.5_0000535g0130.1	-1.59817	2.48265	0.00188365	0.0203493	5.524	6.933	6.188	1.883	1.343	2.58
Nitab4.5_0004924g0060.1	-1.59817	2.4828	0.00188365	0.0203493	7.355	7.171	4.025	1.592	1.977	2.497
Nitab4.5_0001751g0130.1	-1.59886	3.9247	2.15017e-08	1.06645e-06	23.145	18.756	19.37	8.961	6.016	5.373
Nitab4.5_0001467g0140.1	-1.59924	3.34272	0.000702478	0.0091087	14.753	8.768	16.059	1.845	7.341	3.373
Nitab4.5_0000295g0170.1	-1.60086	4.52366	1.59703e-10	1.27113e-08	31.802	33.216	31.094	15.175	8.982	7.631
Nitab4.5_0000103g0440.1	-1.60092	4.1652	1.31495e-09	8.48691e-08	25.251	24.27	24.275	9.553	6.054	8.746
Nitab4.5_0002055g0170.1	-1.6031	8.18977	5.43952e-11	4.62175e-09	491.419	367.266	425.974	170.767	108.181	147.479
Nitab4.5_0000563g0050.1	-1.60461	6.59813	6.45201e-14	8.3822e-12	154.504	116.709	151.301	48.476	50.378	41.194
Nitab4.5_0000923g0050.1	-1.61429	4.53921	0.000119848	0.00207156	31.887	35.974	29.263	14.738	14.085	3.06
Nitab4.5_0000040g0630.1	-1.61676	4.93405	1.26165e-13	1.60797e-11	40.047	47.231	42.538	15.883	13.329	13.031
Nitab4.5_0001232g0030.1	-1.61703	8.20838	1.65181e-05	0.000374577	274.337	470.337	556.477	98.34	136.891	193.143
Nitab4.5_0000367g0010.1	-1.61908	5.16767	0.00047225	0.006572	60.536	54.233	38.824	28.262	15.269	7.419
Nitab4.5_0000550g0010.1	-1.61983	3.70208	4.30219e-07	1.54152e-05	18.563	18.101	15.407	6.874	3.89	5.889
Nitab4.5_0002456g0150.1	-1.62031	5.19908	0.000124215	0.00213424	79.649	33.375	45.467	24.369	14.327	12.985
Nitab4.5_0001984g0010.1	-1.62167	7.23045	3.07012e-05	0.00064332	209.78	180.097	269.841	57.845	113.815	45.572
Nitab4.5_0000113g0330.1	-1.62192	2.81235	0.000347745	0.00508905	10.033	6.774	8.009	1.311	1.987	4.267
Nitab4.5_0000694g0030.1	-1.62339	4.9947	3.21242e-05	0.000669654	49.572	40.516	46.47	9.029	10.335	24.689
Nitab4.5_0000276g0100.1	-1.62354	5.06645	2.07869e-12	2.28735e-10	52.09	45.029	46.315	19.815	14.728	11.842
Nitab4.5_0000318g0090.1	-1.62404	6.86446	1.05228e-19	3.59147e-17	178.623	163.325	169.202	60.893	55.574	50.382
Nitab4.5_0003200g0090.1	-1.62547	7.28264	2.05129e-10	1.61988e-08	243.985	212.679	227.955	91.019	51.413	82.204
Nitab4.5_0000827g0040.1	-1.62616	7.93878	1.40381e-06	4.30924e-05	331.846	357.109	392.469	149.223	140.007	65.21
Nitab4.5_0000108g0460.1	-1.63061	4.22176	3.33645e-10	2.52579e-08	24.574	27.384	25.269	9.349	8.469	7.714
Nitab4.5_0001170g0190.1	-1.63345	9.47382	1.1095e-09	7.32524e-08	1156.04	1030.18	965.14	460.523	310.16	255.368
Nitab4.5_0006444g0020.1	-1.63668	7.40661	3.79746e-08	1.75609e-06	289.101	255.139	204.735	110.66	57.141	75.007
Nitab4.5_0000428g0040.1	-1.64012	7.88707	1.48824e-11	1.38104e-09	383.556	387.251	276.774	124.175	90.132	124.311
Nitab4.5_0002532g0010.1	-1.64303	6.39351	1.71933e-19	5.67575e-17	128.067	119.218	121.096	36.981	37.814	44.097
Nitab4.5_0000508g0180.1	-1.64681	2.38761	0.00456191	0.0406295	7.44	6.546	3.477	1.039	2.481	1.917
Nitab4.5_0005356g0040.1	-1.65259	6.63643	1.24161e-14	1.89411e-12	145.794	144.827	147.917	35.116	49.837	55.073
Nitab4.5_0000188g0310.1	-1.6555	3.56384	4.06465e-06	0.00010896	18.648	11.148	17.611	5.612	3.199	6.082
Nitab4.5_0001417g0090.1	-1.65597	2.62993	0.000682187	0.00888016	7.81	7.161	6.55	1.825	2.77	2.092
Nitab4.5_0001478g0030.1	-1.65617	3.61983	5.44884e-07	1.89505e-05	17.727	18.131	12.934	4.748	5.251	5.152
Nitab4.5_0001486g0010.1	-1.65864	3.6228	0.0013181	0.0152456	21.981	9.522	17.373	9.233	2.379	4.599
Nitab4.5_0003016g0020.1	-1.66086	4.75232	1.05486e-11	1.01151e-09	39.602	38.493	36.661	10.029	9.775	16.865
Nitab4.5_0005000g0010.1	-1.66215	2.83634	0.000223456	0.00350799	8.689	8.837	8.092	1.35	3.059	3.926
Nitab4.5_0000091g0510.1	-1.66232	6.16165	1.68029e-11	1.54502e-09	112.446	84.018	118.023	34.932	26.77	38.909
Nitab4.5_0000258g0120.1	-1.66243	4.44571	2.50512e-10	1.94022e-08	26.966	28.595	35.937	9.204	10.316	10.091
Nitab4.5_0000044g0390.1	-1.66484	7.82698	3.13055e-18	8.75554e-16	349.446	300.833	357.474	115.874	94.227	110.755
Nitab4.5_0000118g0080.1	-1.66531	5.80923	1.70402e-05	0.000384874	68.441	71.948	104.603	16.951	40.967	20.256
Nitab4.5_0000498g0190.1	-1.66564	4.65331	1.44751e-11	1.35574e-09	31.919	38.592	35.947	12.379	13.609	7.898
Nitab4.5_0000116g0400.1	-1.66565	4.31388	0.000473177	0.00658036	24.32	15.711	43.397	5.806	11.575	8.912
Nitab4.5_0000666g0100.1	-1.67132	3.25427	9.19616e-06	0.000223381	15.018	12.398	9.685	3.845	3.862	3.189
Nitab4.5_0000187g0220.1	-1.67197	4.63212	2.56675e-08	1.24247e-06	32.014	42.54	31.332	12.67	14.439	6.562
Nitab4.5_0001293g0050.1	-1.67535	4.57524	1.44228e-13	1.82662e-11	34.385	35.299	31.663	11.087	10.167	10.368
Nitab4.5_0003063g0040.1	-1.67823	3.7905	4.60032e-06	0.00012157	16.118	24.578	15.231	4.029	5.279	8.147
Nitab4.5_0000976g0240.1	-1.68855	5.20927	1.0285e-15	1.90009e-13	54.26	51.962	54.014	19.981	12.639	17.04
Nitab4.5_0000846g0030.1	-1.69511	6.53255	3.27748e-08	1.53843e-06	148.503	160.935	101.343	57.505	38.812	31.315
Nitab4.5_0001000g0160.1	-1.69579	5.05081	4.1705e-06	0.000111087	66.092	40.735	37.075	12.922	9.887	20.763
Nitab4.5_0000246g0060.1	-1.69708	3.9009	4.7346e-09	2.69324e-07	22.087	18.845	20.26	6.34	3.386	9.354
Nitab4.5_0002930g0030.1	-1.70025	3.03991	4.74704e-05	0.000934421	8.181	9.581	13.048	3.262	3.936	1.677
Nitab4.5_0001101g0120.1	-1.70035	6.28606	7.87431e-17	1.80187e-14	124.247	103.656	117.589	42.32	33.197	31.647
Nitab4.5_0000728g0140.1	-1.70131	2.86027	0.000856479	0.0107341	8.668	10.265	7.336	0.34	5.177	2.516
Nitab4.5_0000705g0020.1	-1.70368	2.54438	0.000755552	0.0096908	7.757	4.959	8.009	2	2.239	1.945
Nitab4.5_0000901g0110.1	-1.70608	2.42161	0.00490748	0.0430784	9.112	3.789	5.888	1.136	3.003	1.244
Nitab4.5_0001110g0030.1	-1.70794	4.38076	3.42267e-12	3.6085e-10	26.532	29.934	31.436	10.534	7.397	9.465
Nitab4.5_0000787g0200.1	-1.7089	9.7476	7.68939e-13	8.74809e-11	1433.34	1276.02	1148.97	505.776	324.673	361.044
Nitab4.5_0003441g0100.1	-1.71149	6.94729	3.04389e-17	7.66186e-15	196.434	170.764	182.685	53.155	67.513	48.816
Nitab4.5_0003603g0040.1	-1.7135	9.31165	3.1789e-17	7.90291e-15	1049.5	773.877	1028.4	286.252	282.41	308.496
Nitab4.5_0000009g0440.1	-1.71444	8.8759	3.5262e-14	4.8635e-12	746.019	624.954	736.109	261.019	218.694	169.532
Nitab4.5_0001833g0030.1	-1.71922	5.1927	1.89411e-09	1.16999e-07	40.819	63.785	54.79	12.32	19.42	16.468
Nitab4.5_0000485g0050.1	-1.71964	4.57653	4.81149e-07	1.69683e-05	30.871	25.341	45.177	7.32	12.051	11.087
Nitab4.5_0000377g0210.1	-1.71971	3.77896	0.00542184	0.0466386	18.055	30.201	8.04	9	5.727	2.479
Nitab4.5_0000707g0230.1	-1.72107	7.18852	1.11618e-15	2.02491e-13	254.092	182.785	216.138	61.029	65.899	72.224
Nitab4.5_0000581g0050.1	-1.72235	4.8725	1.90159e-11	1.74056e-09	51.233	36.658	38.969	11.243	13.432	13.999
Nitab4.5_0000185g0190.1	-1.72388	7.79117	1.80227e-06	5.3935e-05	316.215	234.281	442.085	64.262	112.285	125.749
Nitab4.5_0001663g0020.1	-1.72642	3.28975	3.79959e-06	0.000102701	9.292	13.935	14.466	4.65	4.002	2.617
Nitab4.5_0002005g0020.1	-1.72804	3.96928	4.59734e-08	2.07571e-06	18.309	23.616	22.62	10.097	4.02	5.502
Nitab4.5_0000021g0720.1	-1.73169	5.29291	4.61892e-07	1.64041e-05	61.086	42.064	68.407	18.689	9.925	22.809
Nitab4.5_0003914g0080.1	-1.73315	3.06119	3.03653e-05	0.00063894	11.335	7.707	12.748	3.369	2.164	3.917
Nitab4.5_0003282g0050.1	-1.73484	4.2976	8.13635e-07	2.68593e-05	37.793	23.358	22.609	11.087	8.507	6.221
Nitab4.5_0000110g0020.1	-1.73552	7.8659	1.20465e-08	6.30078e-07	265.267	480.86	301.122	126.971	99.991	90.194
Nitab4.5_0001449g0020.1	-1.73773	4.18439	6.47228e-11	5.40798e-09	24.743	29.081	23.406	6.175	10.036	6.58
Nitab4.5_0000787g0220.1	-1.73954	4.50113	1.91672e-13	2.38253e-11	31.093	32.919	32.253	10.476	9.897	8.534
Nitab4.5_0000785g0170.1	-1.73962	4.70518	1.625e-06	4.943e-05	33.792	52.151	25.941	11.214	9.132	13.916
Nitab4.5_0000256g0170.1	-1.73968	10.2569	1.85185e-09	1.15095e-07	2238.39	1378.35	1905.99	495.514	456.313	714.891
Nitab4.5_0000028g0180.1	-1.74047	8.26059	3.9248e-15	6.42551e-13	556.305	366.323	458.714	139.611	136.164	141.001
Nitab4.5_0000556g0190.1	-1.7472	3.44138	8.271e-07	2.72591e-05	13.673	13.509	16.649	3.816	5.205	3.566
Nitab4.5_0003149g0030.1	-1.75076	3.84314	1.19854e-08	6.28516e-07	17.928	18.389	22.878	7.34	7.024	3.207
Nitab4.5_0000022g0250.1	-1.75192	5.84986	8.68496e-19	2.53462e-16	82.305	84.931	88.554	30.582	22.797	23.74
Nitab4.5_0000799g0030.1	-1.75252	3.84287	1.39985e-07	5.57811e-06	22.214	15.046	22.268	5.058	4.496	7.612
Nitab4.5_0000864g0040.1	-1.75315	6.28575	0.000165082	0.00272704	151.35	116.322	80.928	16.417	31.35	56.032
Nitab4.5_0001603g0020.1	-1.75367	2.57315	0.00106879	0.012788	5.588	6.854	7.895	2.66	1.698	2.129
Nitab4.5_0001556g0010.1	-1.75512	5.4172	8.19791e-12	7.97495e-10	74.95	49.185	64.009	18.65	16.174	20.864
Nitab4.5_0002597g0010.1	-1.75745	5.94787	4.37077e-05	0.000870565	76.781	90.564	107.79	44.854	23.627	13.317
Nitab4.5_0000636g0120.1	-1.75926	3.44068	0.00169108	0.0186593	15.526	9.532	17.787	1.447	2.836	8.285
Nitab4.5_0000676g0190.1	-1.76064	2.45304	0.00188365	0.0203493	7.154	5.703	5.577	2.728	1.101	1.392
Nitab4.5_0000639g0170.1	-1.76386	3.57717	1.81178e-07	7.08425e-06	16.69	18.994	12.965	4.107	5.261	4.424
Nitab4.5_0000726g0030.1	-1.766	3.90277	1.58182e-08	8.1466e-07	21.96	16.425	23.561	7.913	4.785	5.668
Nitab4.5_0001244g0140.1	-1.76661	5.33939	6.8508e-19	2.05902e-16	58.991	62.704	56.704	17.349	16.258	19.224
Nitab4.5_0003691g0070.1	-1.76852	3.16288	0.00242446	0.0248527	15.737	4.126	15.004	2.427	4.347	3.023
Nitab4.5_0007571g0020.1	-1.76952	5.61808	6.33792e-10	4.57444e-08	53.974	89.513	73.664	18.01	26.08	20.099
Nitab4.5_0001040g0030.1	-1.76982	2.3218	0.00505848	0.0440964	6.868	3.67	6.322	3.718	0.196	1.069
Nitab4.5_0001863g0120.1	-1.77345	6.47423	2.8338e-09	1.67836e-07	131.115	115.231	152.315	25.184	52.3	39.747
Nitab4.5_0000410g0420.1	-1.77403	4.28728	8.52935e-10	5.96373e-08	26.14	23.526	34.178	8.796	6.8	8.515
Nitab4.5_0000495g0090.1	-1.77567	4.84034	1.90317e-07	7.41134e-06	40.311	54.719	29.656	16.252	10.549	10.672
Nitab4.5_0001618g0140.1	-1.77609	6.86797	3.28223e-13	3.93418e-11	155.837	192.802	176.062	65.99	49.539	39.194
Nitab4.5_0000130g0150.1	-1.77762	6.40274	3.05444e-07	1.1265e-05	129.453	101.276	148.424	51.505	39.726	21.279
Nitab4.5_0000319g0200.1	-1.78068	4.98581	8.16112e-17	1.84652e-14	47	44.95	46.802	12.32	11.818	16.293
Nitab4.5_0000050g0250.1	-1.78095	2.17627	0.00593517	0.0498817	4.964	3.412	5.453	1.476	1.502	1.078
Nitab4.5_0002542g0030.1	-1.78207	5.07685	1.07952e-16	2.38883e-14	47.804	47.846	52.917	13.155	17.172	12.828
Nitab4.5_0002093g0010.1	-1.78458	3.25476	2.64508e-06	7.55518e-05	12.774	12.983	12.272	5.049	3.293	2.756
Nitab4.5_0001531g0020.1	-1.79154	5.46633	7.96305e-09	4.28748e-07	67.986	55.354	71.915	21.233	25.212	10.303
Nitab4.5_0001200g0100.1	-1.79156	8.47109	2.611e-12	2.82676e-10	566.105	498.297	545.363	199.825	158.979	111.621
Nitab4.5_0000569g0030.1	-1.79191	2.71168	0.000171008	0.0028111	9.229	9.075	5.66	4.116	1.446	1.585
Nitab4.5_0000256g0100.1	-1.79318	2.71186	0.00531131	0.0459621	6.826	5.683	11.579	0.369	4.533	1.64
Nitab4.5_0001580g0070.1	-1.79409	4.80055	1.50176e-11	1.3872e-09	48.09	34.853	39.3	14.427	9.206	10.875
Nitab4.5_0000377g0110.1	-1.79456	7.02033	4.36531e-09	2.51875e-07	246.577	156.303	184.257	77.262	51.917	41.738
Nitab4.5_0000048g0140.1	-1.80157	7.75354	1.51249e-17	3.95547e-15	309.24	360.382	308.913	114.757	84.461	84.941
Nitab4.5_0003091g0040.1	-1.80771	3.60822	1.19607e-06	3.75159e-05	21.389	11.694	16.856	4.243	5.251	4.636
Nitab4.5_0004152g0010.1	-1.80852	6.87789	2.70835e-05	0.000580809	200.858	135.306	195.319	23.961	50.303	78.131
Nitab4.5_0001531g0050.1	-1.8158	9.13873	3.95109e-18	1.08173e-15	999.56	812.688	759.546	271.242	256.946	209.04
Nitab4.5_0000676g0010.1	-1.82181	8.16206	1.40257e-16	3.06995e-14	477.756	433.371	394.456	106.427	113.759	152.446
Nitab4.5_0001372g0100.1	-1.82607	3.12075	5.80788e-05	0.00110961	6.424	13.3	13.69	3.136	2.78	2.995
Nitab4.5_0000140g0200.1	-1.82712	5.29484	3.48993e-12	3.66025e-10	64.536	46.2	63.368	20.961	14.961	13.731
Nitab4.5_0000222g0140.1	-1.82717	7.18644	4.57667e-14	6.18526e-12	218.246	200.34	242.979	50.534	81.374	56.511
Nitab4.5_0002435g0040.1	-1.82755	3.12211	7.74111e-06	0.000191974	12.975	12.001	9.685	5.107	2.024	2.838
Nitab4.5_0000456g0010.1	-1.83039	2.35564	0.00334821	0.0321061	5.26	3.799	8.775	2.097	1.576	1.613
Nitab4.5_0000680g0060.1	-1.83212	6.20126	6.10974e-13	7.07079e-11	118.764	129.474	84.073	30.359	28.262	35.729
Nitab4.5_0000082g0150.1	-1.83763	5.8942	5.17018e-08	2.30336e-06	76.368	75.667	115.25	34.301	25.828	15.446
Nitab4.5_0000024g0180.1	-1.83848	3.7444	9.06172e-06	0.000220753	22.087	11.287	22.723	6.534	3.143	6.046
Nitab4.5_0000207g0230.1	-1.84011	3.50463	3.15878e-07	1.16073e-05	17.759	12.398	15.956	6.456	1.642	5.142
Nitab4.5_0000537g0060.1	-1.84029	5.41321	1.56554e-16	3.38981e-14	71.881	56.445	62.24	19.718	15.101	19.344
Nitab4.5_0002172g0010.1	-1.8414	7.83515	1.45357e-14	2.1682e-12	349.689	283.148	409.315	116.262	90.99	86.185
Nitab4.5_0001332g0130.1	-1.85011	2.21363	0.00372671	0.0349208	6.085	5.991	3.704	0.932	2.92	0.562
Nitab4.5_0002684g0190.1	-1.85497	4.26976	5.94458e-13	6.91943e-11	27.188	25.331	30.463	9.757	5.69	7.944
Nitab4.5_0001121g0070.1	-1.85654	5.7683	1.294e-11	1.22335e-09	62.039	81.886	101.364	19.942	22.088	26.569
Nitab4.5_0001401g0150.1	-1.85988	4.92588	4.54145e-15	7.31609e-13	51.773	42.321	40.572	12.097	13.674	11.639
Nitab4.5_0000093g0110.1	-1.86649	5.66714	2.75355e-09	1.63564e-07	70.473	86.041	71.874	25.505	26.266	11.335
Nitab4.5_0003285g0040.1	-1.86679	3.05987	0.000541962	0.00734396	11.938	15.73	4.987	2.621	2.845	3.161
Nitab4.5_0000463g0020.1	-1.86843	4.6059	0.000370307	0.00536852	35.348	46.031	25.424	17.612	9.15	2.995
Nitab4.5_0002534g0030.1	-1.87512	2.76469	0.00231847	0.023979	8.509	5.415	11.382	5.184	0.989	1.06
Nitab4.5_0002629g0030.1	-1.88046	7.92969	5.62577e-08	2.4898e-06	474.19	268.142	379.028	75.048	88.257	142.687
Nitab4.5_0000939g0060.1	-1.88249	2.97661	1.41287e-05	0.000324783	10.678	9.958	9.789	4.99	2.332	1.475
Nitab4.5_0000244g0010.1	-1.88417	6.20947	0.000153088	0.00255616	148.344	77.69	111.277	12.971	27.768	50.428
Nitab4.5_0000514g0070.1	-1.88797	2.38863	0.00132252	0.0152879	8.149	5.455	4.408	1.961	0.951	1.779
Nitab4.5_0001507g0100.1	-1.89066	3.32469	6.04324e-07	2.07313e-05	9.991	15.106	16.111	3.388	3.572	4
Nitab4.5_0000142g0440.1	-1.90022	7.79879	1.17316e-23	6.56222e-21	346.366	322.594	355.881	106.029	89.778	81.108
Nitab4.5_0000443g0010.1	-1.90069	3.08215	5.17634e-06	0.000134846	14.372	10.414	8.557	3.592	2.192	3.179
Nitab4.5_0004234g0080.1	-1.90244	9.07787	6.58115e-28	6.97498e-25	856.423	898.204	741.779	225.31	223.348	224.928
Nitab4.5_0000297g0160.1	-1.90299	6.02725	2.66233e-14	3.77545e-12	107.398	78.99	110.345	28.777	30.557	20.837
Nitab4.5_0003905g0010.1	-1.90582	3.55015	8.78373e-08	3.70038e-06	20.426	13.955	13.514	3.971	4.645	4.147
Nitab4.5_0000021g1030.1	-1.90972	4.18718	2.8369e-10	2.17211e-08	31.432	24.409	22.889	10.563	3.768	6.377
Nitab4.5_0000109g0360.1	-1.91612	2.25047	0.002321	0.0239805	4.614	5.088	6.25	2.369	0.905	1.29
Nitab4.5_0000028g0420.1	-1.91706	6.52794	6.07211e-24	3.70527e-21	131.549	151.661	140.022	35.68	37.021	40.881
Nitab4.5_0003058g0050.1	-1.9193	5.64162	6.63681e-16	1.29753e-13	90.698	67.782	68.252	21.485	21.976	16.837
Nitab4.5_0002568g0030.1	-1.92435	8.59674	1.00033e-27	1.00719e-24	647.405	582.662	563.151	157.378	172.354	147.092
Nitab4.5_0000621g0030.1	-1.92723	5.35254	3.49188e-07	1.27154e-05	85.766	57.318	42.135	23.184	12.35	13.602
Nitab4.5_0000073g0270.1	-1.92985	9.03224	1.72981e-23	9.41437e-21	806.84	897.837	723.464	238.456	191.084	213.058
Nitab4.5_0000258g0230.1	-1.93147	3.10163	3.21696e-06	8.89834e-05	10.88	12.973	10.027	2.456	2.836	2.958
Nitab4.5_0000944g0090.1	-1.93205	6.91055	5.81139e-14	7.69894e-12	144.397	195.034	214.006	55.388	52.766	38.936
Nitab4.5_0004160g0030.1	-1.93562	6.14935	1.04584e-05	0.000250418	110.742	112.008	102.616	48.223	13.245	24.044
Nitab4.5_0003463g0070.1	-1.93793	2.68496	6.91432e-05	0.00129225	6.794	8.232	8.609	3.058	1.026	2.203
Nitab4.5_0000038g0180.1	-1.94588	5.43542	1.30519e-06	4.03415e-05	81.522	47.043	67.797	8.359	24.382	18.533
Nitab4.5_0000893g0030.1	-1.95034	4.12741	2.87786e-10	2.19513e-08	28.522	28.684	19.091	6.728	6.287	6.589
Nitab4.5_0000287g0070.1	-1.95075	6.25989	3.53641e-15	5.88535e-13	136.745	112.097	104.23	24.757	26.929	39.563
Nitab4.5_0000209g0290.1	-1.95386	2.0984	0.00408453	0.0374527	5.63	3.164	5.06	0.612	1.548	1.17
Nitab4.5_0000048g0080.1	-1.95615	7.59886	1.35021e-05	0.000312161	364.876	261.566	273.556	134.252	55.005	44.309
Nitab4.5_0001013g0080.1	-1.95722	6.47224	6.77197e-19	2.05902e-16	139.571	128.432	141.471	28.505	45.117	33.103
Nitab4.5_0000382g0070.1	-1.95956	3.83125	2.5757e-10	1.98723e-08	19.992	21.741	18.563	6.951	4.552	4.23
Nitab4.5_0003554g0020.1	-1.96042	4.73084	0.000222309	0.00349465	26.775	70.45	21.233	10.359	11.855	8.497
Nitab4.5_0002312g0110.1	-1.96119	6.83912	4.16661e-05	0.000832372	155.594	147.079	225.958	19.99	75.553	41.102
Nitab4.5_0002333g0100.1	-1.96178	5.16784	0.000187623	0.00303224	63.097	60.145	39.9	5.825	25.557	10.635
Nitab4.5_0009102g0010.1	-1.96189	5.14747	1.03204e-07	4.24472e-06	61.203	32.165	67.124	15.621	15.064	10.202
Nitab4.5_0001004g0220.1	-1.96484	5.12514	3.42688e-16	7.04153e-14	61.689	45.485	50.723	12.534	14.439	13.464
Nitab4.5_0000737g0120.1	-1.96692	6.76752	6.16502e-07	2.10415e-05	190.307	163.851	150.701	72.039	29.438	29.14
Nitab4.5_0000280g0010.1	-1.96695	6.43109	3.3318e-15	5.59103e-13	142.058	106.493	149.852	28.544	32.6	41.305
Nitab4.5_0000102g0050.1	-1.96954	9.40523	7.97707e-22	3.65078e-19	1132.38	1011.6	1019.9	325.145	262.114	228.366
Nitab4.5_0001712g0010.1	-1.9696	2.93063	0.000111382	0.0019419	5.567	9.948	13.897	1.417	2.556	3.566
Nitab4.5_0000166g0090.1	-1.97018	8.82953	6.95687e-15	1.11183e-12	823.467	528.31	770.69	171.184	211.614	163.312
Nitab4.5_0000016g0610.1	-1.97223	3.37648	0.000115545	0.00200235	19.78	13.449	9.53	2.369	1.884	6.746
Nitab4.5_0000194g0190.1	-1.97475	6.3247	4.19569e-13	4.96992e-11	117.357	155.747	96.501	37.699	26.77	30.541
Nitab4.5_0001406g0020.1	-1.97557	4.47227	4.89096e-16	9.6672e-14	35.528	32.294	30.142	9.126	9.654	6.654
Nitab4.5_0001245g0010.1	-1.97868	5.39468	5.58601e-07	1.92942e-05	61.033	88.918	41.949	23.379	12.732	12.644
Nitab4.5_0000059g0310.1	-1.97923	2.28587	0.00143458	0.0163118	4.646	6.268	6.074	1.544	1.129	1.17
Nitab4.5_0002577g0100.1	-1.97924	2.286	0.00143458	0.0163118	6.445	4.959	5.329	0.466	0.634	2.433
Nitab4.5_0001320g0110.1	-1.97925	2.28598	0.00143458	0.0163118	7.006	4.562	5.846	0.903	0.298	3.087
Nitab4.5_0000786g0170.1	-1.97925	6.64767	1.67143e-18	4.80822e-16	165.426	149.767	149.49	50.485	37.702	30.67
Nitab4.5_0001083g0130.1	-1.98223	3.90261	6.01399e-11	5.0671e-09	21.823	23.834	18.522	8.252	3.442	4.295
Nitab4.5_0000208g0240.1	-1.98238	7.53126	1.21855e-06	3.80434e-05	315.379	361.414	184.795	107.097	44.25	68.657
Nitab4.5_0000541g0090.1	-1.98677	6.97856	1.34097e-20	5.19289e-18	213.854	184.649	187.32	60.738	42.347	45.94
Nitab4.5_0000699g0140.1	-1.98994	7.26323	1.90572e-15	3.27996e-13	221.517	299.851	194.108	68.476	57.346	55.727
Nitab4.5_0000907g0080.1	-1.99531	5.42904	3.61165e-05	0.000736856	87.703	58.865	50.196	29.951	9.775	10.515
Nitab4.5_0001227g0020.1	-1.99747	2.45223	0.000510046	0.00699646	6.096	6.943	6.674	0.738	1.558	2.82
Nitab4.5_0000875g0060.1	-1.99752	3.74275	2.89679e-07	1.07427e-05	18.446	23.655	14.435	7.388	2.92	4.129
Nitab4.5_0001737g0090.1	-1.99821	3.91556	5.19585e-10	3.80468e-08	26.077	20.253	18.646	8.563	4.188	3.649
Nitab4.5_0000062g0620.1	-1.9991	4.25203	4.07598e-14	5.54582e-12	29.686	29.854	24.234	9.058	5.41	6.423
Nitab4.5_0000121g0090.1	-2.00597	6.69821	1.47543e-20	5.502e-18	152.038	183.082	147.307	37.379	47.981	36.236
Nitab4.5_0000165g0150.1	-2.00622	3.62144	1.85933e-07	7.25609e-06	16.34	21.513	13.948	6.592	3.591	2.433
Nitab4.5_0000412g0050.1	-2.00629	6.9371	4.17065e-16	8.39844e-14	204.054	178.996	187.92	60.029	50.061	33.223
Nitab4.5_0000270g0120.1	-2.01267	3.06198	2.05284e-06	6.06128e-05	11.282	10.246	11.755	3.583	2.696	1.825
Nitab4.5_0000500g0320.1	-2.03053	2.8629	9.33504e-06	0.000226209	10.943	7.359	9.83	2.146	2.752	1.751
Nitab4.5_0007026g0060.1	-2.03098	4.08969	8.91994e-07	2.91592e-05	36.036	18.597	20.302	4.184	7.108	7.409
Nitab4.5_0002252g0030.1	-2.03813	4.32385	2.25634e-15	3.81815e-13	29.707	31.064	28.187	10.214	6.324	5.502
Nitab4.5_0002738g0020.1	-2.03961	3.83205	6.33828e-11	5.31808e-09	22.585	20.015	19.515	6.194	4.039	4.912
Nitab4.5_0000168g0120.1	-2.04765	8.27186	1.77611e-15	3.16509e-13	573.619	379.723	502.639	93.301	129.494	131.739
Nitab4.5_0000013g0470.1	-2.0525	6.94967	1.37732e-14	2.08534e-12	162.536	241.839	174.562	41.398	57.626	41.572
Nitab4.5_0000103g0310.1	-2.05273	3.27341	1.04514e-07	4.27764e-06	13.43	12.745	13.503	1.699	5.494	2.571
Nitab4.5_0001999g0030.1	-2.05832	4.53448	8.29663e-16	1.57612e-13	39.369	31.144	34.167	9.612	6.38	9.437
Nitab4.5_0001373g0090.1	-2.06672	2.88542	5.66029e-06	0.00014483	9.387	10.474	8.402	1.699	3.656	2.147
Nitab4.5_0002271g0010.1	-2.06977	4.74389	4.37892e-11	3.75226e-09	50.355	34.913	35.751	7.155	7.863	13.593
Nitab4.5_0004554g0010.1	-2.08519	3.60877	1.22508e-09	7.95788e-08	19.854	16.316	15.77	4.524	4.347	3.428
Nitab4.5_0000755g0140.1	-2.08832	9.11576	5.46918e-29	6.47841e-26	921.848	901.754	807.186	235.174	204.432	185.089
Nitab4.5_0000283g0070.1	-2.09101	5.91186	5.56771e-20	1.93305e-17	97.767	103.161	79.769	26.175	22.134	18.072
Nitab4.5_0000258g0210.1	-2.09204	4.8867	1.85674e-16	3.97758e-14	51.815	45.386	38.399	11.32	11.454	8.995
Nitab4.5_0001135g0140.1	-2.09775	2.35572	0.000536751	0.00729815	7.249	5.763	4.894	1.699	1.511	1.631
Nitab4.5_0000216g0010.1	-2.10128	2.65851	0.000612367	0.00813406	5.789	6.397	11.444	2.495	0	2.912
Nitab4.5_0000309g0100.1	-2.10202	2.90879	3.41849e-06	9.36573e-05	9.038	11.317	9.685	1.806	3.675	1.392
Nitab4.5_0001309g0110.1	-2.1082	5.73108	1.26171e-07	5.06118e-06	87.618	86.418	73.602	33.437	12.695	11.501
Nitab4.5_0000978g0190.1	-2.12379	3.83332	6.90813e-09	3.76989e-07	21.336	15.086	26.148	5.515	3.983	4.774
Nitab4.5_0002561g0040.1	-2.13001	4.26273	5.31923e-13	6.26393e-11	26.172	26.928	32.998	9.845	6.361	3.778
Nitab4.5_0000044g0310.1	-2.13012	6.63663	5.4917e-06	0.000141596	150.546	134.949	184.723	13.165	45.64	49.249
Nitab4.5_0000423g0060.1	-2.13523	3.04151	7.08615e-06	0.000177259	10.562	8.798	14.631	0.495	5.028	2.258
Nitab4.5_0000407g0120.1	-2.13651	2.93271	3.2881e-06	9.07021e-05	13.568	9.73	7.378	2.553	2.574	1.115
Nitab4.5_0005562g0010.1	-2.1445	3.58147	2.90066e-06	8.15792e-05	17.547	12.983	21.13	7.437	1.838	1.76
Nitab4.5_0000250g0010.1	-2.14576	3.50662	0.000118048	0.00204397	21.399	14.6	12.024	7.33	0.7	2.304
Nitab4.5_0000315g0140.1	-2.14621	5.24253	2.93501e-09	1.73321e-07	39.211	70.678	65.51	9.252	18.655	12.736
Nitab4.5_0000063g0020.1	-2.1623	2.21516	0.00131797	0.0152456	7.99	3.204	4.108	1.282	1.315	0.71
Nitab4.5_0001039g0020.1	-2.16585	3.59376	4.50629e-10	3.33614e-08	18.002	19.589	14.424	3.738	5.485	2.792
Nitab4.5_0002038g0030.1	-2.17555	5.54444	2.00997e-22	9.91994e-20	79.882	75.469	63.585	18.592	14.896	14.791
Nitab4.5_0001423g0140.1	-2.18117	5.48969	3.58196e-15	5.91229e-13	86.359	54.154	70.549	16.427	16.985	13.39
Nitab4.5_0004841g0020.1	-2.18836	7.85995	6.11209e-05	0.00116222	494.002	298.194	322.044	147.107	33.094	66.418
Nitab4.5_0005061g0040.1	-2.19359	7.77292	9.39127e-11	7.68748e-09	343.181	235.124	469.568	74.068	96.839	60.345
Nitab4.5_0000118g0190.1	-2.19507	5.13267	1.16446e-14	1.78998e-12	68.695	45.753	49.295	13.825	10.493	11.934
Nitab4.5_0000045g0110.1	-2.20502	8.51364	3.48185e-26	2.80456e-23	624.386	601.189	532.181	149.747	129.196	105.308
Nitab4.5_0001892g0050.1	-2.20803	3.83316	3.22706e-12	3.45549e-10	23.505	18.071	21.233	5.282	3.386	4.718
Nitab4.5_0002293g0010.1	-2.20954	3.29344	4.72086e-07	1.67072e-05	17.79	9.046	14.29	2.835	4.412	2.055
Nitab4.5_0000350g0260.1	-2.21065	2.42196	0.00126267	0.0147742	6.308	3.62	9.799	0.544	1.101	2.092
Nitab4.5_0001480g0060.1	-2.21367	4.82803	4.64073e-19	1.4377e-16	46.672	40.338	44.784	11.029	11.809	6.055
Nitab4.5_0000875g0090.1	-2.22163	3.90435	1.01639e-08	5.38607e-07	28.839	20.481	17.166	5.602	1.884	6.718
Nitab4.5_0002641g0010.1	-2.22463	2.73812	5.33773e-06	0.000138353	9.578	10.89	5.939	1.796	1.492	2.138
Nitab4.5_0006875g0010.1	-2.23372	4.96759	2.78712e-24	1.75388e-21	47.487	48.491	49.699	12.33	9.869	9.363
Nitab4.5_0000316g0340.1	-2.24081	7.37002	2.98494e-22	1.39786e-19	326.766	247.423	222.926	58.806	54.464	56.419
Nitab4.5_0000151g0280.1	-2.24126	5.97816	1.45881e-11	1.36001e-09	101.165	89.374	109.828	32.039	20.772	11.686
Nitab4.5_0008441g0030.1	-2.24762	2.88512	1.86101e-06	5.54367e-05	6.752	12.467	9.758	2.272	1.866	1.88
Nitab4.5_0000535g0200.1	-2.24997	2.05753	0.00154697	0.0173545	4.149	5.257	4.584	1.243	0.522	0.922
Nitab4.5_0000080g0080.1	-2.25144	2.05841	0.0027583	0.027348	7.578	2.926	3.466	0.971	1.035	0.654
Nitab4.5_0002682g0060.1	-2.25347	3.12427	6.74351e-08	2.9266e-06	14.689	11.089	9.82	4.961	1.632	1.456
Nitab4.5_0005986g0020.1	-2.25348	3.12272	9.75503e-08	4.04191e-06	9.451	13.568	12.748	2.816	3.022	1.806
Nitab4.5_0003496g0010.1	-2.25605	4.44724	5.96169e-10	4.33396e-08	31.189	45.247	23.861	7.748	5.307	7.704
Nitab4.5_0003408g0140.1	-2.25785	2.45249	0.000250957	0.00386355	6.138	9.541	4.16	1.252	1.045	1.355
Nitab4.5_0000639g0190.1	-2.27891	6.1423	8.44335e-17	1.88915e-14	118.563	97.854	121.728	14.272	29.456	26.154
Nitab4.5_0004281g0070.1	-2.28175	3.14278	5.74957e-08	2.53346e-06	13.779	14.411	8.412	3.311	1.269	2.424
Nitab4.5_0000745g0170.1	-2.2818	9.13808	3.73163e-27	3.31948e-24	902.512	798.971	1034.21	217.805	180.395	169.91
Nitab4.5_0000062g0220.1	-2.28436	2.90978	3.09168e-06	8.62287e-05	13.091	7.875	9.189	1.155	0.728	3.631
Nitab4.5_0000649g0210.1	-2.28669	7.99568	1.45824e-19	4.89409e-17	497.991	404.628	336.127	100.806	68.688	86.499
Nitab4.5_0004010g0080.1	-2.2929	4.18946	1.98372e-15	3.38527e-13	29.273	23.497	30.773	7.379	4.477	4.608
Nitab4.5_0004360g0070.1	-2.29413	4.08027	6.20116e-14	8.16162e-12	26.373	21.215	28.549	6.728	4.375	4.847
Nitab4.5_0007992g0040.1	-2.30122	7.9734	1.20465e-15	2.1659e-13	470.242	453.426	297.79	101.621	63.922	84.554
Nitab4.5_0004194g0090.1	-2.3086	7.26697	3.49274e-23	1.85088e-20	249.181	285.192	211.999	40.971	55.21	55.645
Nitab4.5_0005973g0010.1	-2.31491	4.45884	0.000613729	0.00814678	37.253	37.402	27.762	15.379	1.38	3.926
Nitab4.5_0000456g0140.1	-2.32857	5.36689	2.07886e-21	8.72125e-19	68.41	66.562	62.333	17.456	13.982	7.815
Nitab4.5_0000262g0190.1	-2.32904	9.34915	8.80179e-29	9.84675e-26	1154.58	923.555	1108.98	245.534	183.781	210.607
Nitab4.5_0000284g0090.1	-2.34331	2.32156	0.000192866	0.00309955	5.852	7.687	4.294	1.883	0.616	0.746
Nitab4.5_0000370g0100.1	-2.34332	2.32254	0.000192866	0.00309955	7.588	4.989	5.588	1.835	0.485	0.774
Nitab4.5_0003030g0040.1	-2.34457	3.86955	3.81513e-12	3.92215e-10	18.288	21.195	26.293	5.311	5.578	1.981
Nitab4.5_0002762g0010.1	-2.34459	3.85865	7.31578e-05	0.00135527	26.998	10.384	27.938	1.903	2.901	7.76
Nitab4.5_0000496g0170.1	-2.34901	2.95448	0.000118841	0.00205594	14.298	13.677	4.191	1.942	1.52	2.451
Nitab4.5_0001159g0150.1	-2.35074	6.29876	7.77472e-24	4.60469e-21	143	123.275	114.878	31.65	23.403	20.468
Nitab4.5_0000127g0100.1	-2.35111	3.0831	0.00229047	0.0237381	16.499	15.195	3.766	1.816	3.964	0.654
Nitab4.5_0002726g0090.1	-2.35424	5.88595	1.84255e-20	6.74609e-18	110.054	82.868	92.455	19	13.814	23.38
Nitab4.5_0000044g0100.1	-2.35886	4.52726	1.79837e-15	3.17307e-13	39.338	39.961	28.311	5.379	9.066	6.331
Nitab4.5_0001478g0040.1	-2.36313	4.18854	2.86392e-17	7.30008e-15	28.511	29.576	26.2	7.66	4.048	4.553
Nitab4.5_0001599g0050.1	-2.36549	3.20263	1.85885e-06	5.54367e-05	14.097	8.074	17.322	3.019	3.293	1.428
Nitab4.5_0002044g0040.1	-2.36836	3.20333	1.86222e-05	0.000414818	20.119	7.201	12.313	3.32	1.893	1.797
Nitab4.5_0004784g0010.1	-2.37082	4.66973	2.87794e-07	1.06925e-05	33.115	57.258	29.149	12.33	6.623	3.659
Nitab4.5_0000422g0060.1	-2.3712	3.80601	0.00108593	0.0129777	20.203	23.526	19.37	1.155	0.793	9.833
Nitab4.5_0000084g0050.1	-2.37911	3.96123	1.13535e-14	1.76206e-12	23.854	26.422	20.912	4.816	5.447	3.345
Nitab4.5_0000117g0040.1	-2.3801	1.88187	0.00443083	0.0397609	4.593	4.314	2.711	0.932	0.429	0.461
Nitab4.5_0001805g0010.1	-2.3801	1.88248	0.00258074	0.0259972	5.842	3.154	2.949	0.388	0.466	0.664
Nitab4.5_0002312g0040.1	-2.39249	6.19464	8.86296e-24	5.09924e-21	105.652	124.058	126.312	21.65	17.834	28.818
Nitab4.5_0004581g0030.1	-2.39518	2.13915	0.00198226	0.0211648	8.276	2.807	4.191	1.718	0.112	1.207
Nitab4.5_0000073g0240.1	-2.39859	3.52208	1.83399e-09	1.14338e-07	15.737	13.965	21.254	5.573	1.66	2.59
Nitab4.5_0001763g0070.1	-2.40355	5.49568	2.89899e-19	9.26617e-17	80.676	80.834	55.545	13.913	13.329	13.676
Nitab4.5_0000004g0210.1	-2.41899	3.53719	2.79872e-11	2.49371e-09	19.579	16.504	15.945	6.262	0.746	2.857
Nitab4.5_0001116g0030.1	-2.42062	7.36908	2.67421e-13	3.24401e-11	192.54	340.982	277.892	40.369	68.128	44.567
Nitab4.5_0001423g0120.1	-2.42274	5.72409	9.66247e-09	5.14744e-07	129.104	54.045	73.56	20.582	10.857	16.284
Nitab4.5_0002824g0090.1	-2.42651	6.29436	3.56838e-35	8.98206e-32	135.496	122.719	124.604	25.641	24.793	21.427
Nitab4.5_0001192g0070.1	-2.43945	3.55107	6.65424e-10	4.78559e-08	14.002	15.244	22.609	2.602	2.985	3.972
Nitab4.5_0000257g0090.1	-2.44124	3.25559	1.4033e-09	8.94248e-08	11.271	15.75	14.404	2.039	2.061	3.391
Nitab4.5_0000178g0340.1	-2.44688	2.73893	3.14532e-06	8.72413e-05	7.44	8.827	10.296	2.233	1.287	1.29
Nitab4.5_0000072g0630.1	-2.45282	2.39003	6.64651e-05	0.00125083	7.768	6.288	5.981	2.049	1.325	0
Nitab4.5_0002337g0010.1	-2.45803	3.6509	4.66876e-09	2.67087e-07	22.934	21.166	12.293	1.748	3.283	4.516
Nitab4.5_0002467g0090.1	-2.46568	1.92789	0.00258074	0.0259972	4.413	4.612	2.639	1.621	0	0.894
Nitab4.5_0000148g0070.1	-2.46809	5.29863	2.01975e-22	9.91994e-20	75.617	56.931	57.397	11.01	11.314	11.686
Nitab4.5_0000831g0120.1	-2.47559	4.66074	2.27982e-08	1.11973e-06	51.096	29.438	39.538	9.515	2.229	9.658
Nitab4.5_0000404g0200.1	-2.47701	2.90951	0.00101515	0.0122482	4.032	9.214	17.767	1.883	1.586	2.018
Nitab4.5_0002791g0070.1	-2.49063	6.13145	0.0019113	0.0205674	129.231	171.319	44.101	44.437	8.898	8.709
Nitab4.5_0000444g0150.1	-2.49577	5.30194	8.71235e-06	0.000213172	78.241	79.089	34.861	20.728	5.251	8.045
Nitab4.5_0002518g0050.1	-2.51627	3.31134	7.6109e-09	4.11991e-07	15.42	10.107	17.777	1.913	2.724	2.571
Nitab4.5_0002354g0060.1	-2.54648	1.97251	0.00085715	0.0107341	2.762	4.612	5.132	0.961	1.026	0
Nitab4.5_0000679g0150.1	-2.54648	1.97291	0.00085715	0.0107341	3.704	3.719	5.784	1.524	0.168	0.452
Nitab4.5_0000635g0100.1	-2.558	2.455	0.00121096	0.0142854	11.631	5.733	3.715	1.825	0.149	1.484
Nitab4.5_0000005g0440.1	-2.56646	4.17183	5.62016e-13	6.57983e-11	37.179	23.715	23.716	4.903	5.139	4.212
Nitab4.5_0003495g0010.1	-2.56893	5.36067	5.70038e-08	2.51729e-06	85.745	69.706	45.519	19.922	6.156	7.658
Nitab4.5_0000249g0220.1	-2.57633	4.30012	4.66447e-21	1.87857e-18	32.744	30.053	30.442	5.398	4.44	4.93
Nitab4.5_0004279g0020.1	-2.5791	3.90549	9.05405e-16	1.70394e-13	22.987	21.979	24.617	5.301	1.511	4.691
Nitab4.5_0000469g0040.1	-2.58183	5.57386	3.68886e-23	1.90468e-20	89.957	79.981	64.837	16.728	11.436	11.225
Nitab4.5_0000222g0250.1	-2.58604	4.86811	2.14481e-08	1.06642e-06	71.087	31.838	38.741	4.825	7.08	11.888
Nitab4.5_0000776g0020.1	-2.59363	2.83954	1.01923e-07	4.20577e-06	9.144	8.867	11.279	1.612	2.313	1.299
Nitab4.5_0000098g0140.1	-2.59445	3.65193	0.00218759	0.0230034	17.378	11.515	28.6	0.835	0.886	7.75
Nitab4.5_0000185g0130.1	-2.60293	2.48614	1.29828e-05	0.00030154	9.44	5.286	6.54	1.204	1.278	0.793
Nitab4.5_0000604g0140.1	-2.61345	5.01492	9.25637e-15	1.45621e-12	61.584	54.352	42.104	12.058	10.428	4.193
Nitab4.5_0000768g0030.1	-2.61555	3.1435	9.93594e-10	6.75946e-08	13.875	14.372	10.027	1.981	1.306	2.802
Nitab4.5_0002714g0060.1	-2.6199	3.85937	4.9684e-06	0.000130102	32.681	21.523	12.831	6.107	0.672	3.742
Nitab4.5_0003381g0060.1	-2.63041	4.0909	1.09895e-15	2.01178e-13	30.437	29.239	20.778	4.99	4.598	3.585
Nitab4.5_0000776g0030.1	-2.63391	6.88522	7.59876e-33	1.39106e-29	199.345	178.351	214.555	37.864	26.434	31.721
Nitab4.5_0003987g0070.1	-2.63654	5.88051	1.77641e-17	4.58611e-15	87.512	124.475	79.872	15.379	11.492	20.265
Nitab4.5_0002229g0230.1	-2.63943	2.28752	5.97033e-05	0.00113741	6.032	5.981	6.602	1.427	0.877	0.516
Nitab4.5_0004048g0010.1	-2.65125	2.51678	3.0856e-05	0.000645892	7.948	4.255	10.078	1.243	0.756	1.152
Nitab4.5_0001140g0090.1	-2.65151	3.41212	9.97402e-12	9.60989e-10	16.489	16.088	15.252	2.437	2.873	2.083
Nitab4.5_0003688g0020.1	-2.65437	4.97176	1.37934e-20	5.2407e-18	60.546	44.831	47.298	10.942	6.921	6.774
Nitab4.5_0000006g0100.1	-2.65795	5.195	1.6434e-06	4.98391e-05	74.654	55.086	50.361	19.728	4.281	5.336
Nitab4.5_0000006g0510.1	-2.6584	7.97284	2.90038e-14	4.0559e-12	310.828	533.903	421.794	52.155	95.188	55.359
Nitab4.5_0001159g0210.1	-2.65991	5.15809	7.94908e-16	1.52448e-13	57.477	65.709	52.41	10.029	14.514	4.248
Nitab4.5_0003796g0010.1	-2.69516	2.32284	0.000133767	0.00227506	8.583	6.497	3.839	2.262	0.215	0.516
Nitab4.5_0004784g0030.1	-2.69552	7.18412	1.74003e-13	2.18994e-11	223.993	319.211	190.673	56.165	31.536	27.094
Nitab4.5_0000682g0050.1	-2.69583	8.70503	0.00246535	0.0250858	795.971	945.633	377.507	261.854	37.068	31.721
Nitab4.5_0001083g0030.1	-2.7047	5.43528	1.83951e-14	2.7038e-12	67.034	57.864	89.888	5.515	12.947	14.598
Nitab4.5_0001180g0140.1	-2.70726	3.75834	3.53423e-10	2.66549e-08	19.949	25.956	16.277	6.019	0.457	2.525
Nitab4.5_0005160g0010.1	-2.72953	5.34293	2.84793e-32	4.77907e-29	68.008	70.43	62.488	13.146	9.635	8.147
Nitab4.5_0000309g0200.1	-2.73178	7.6246	0.000450064	0.00630684	294.011	191.949	514.362	9.184	83.211	59.46
Nitab4.5_0000647g0320.1	-2.76482	2.09908	0.000156964	0.00260908	5.63	4.919	3.994	0.563	0.476	0.811
Nitab4.5_0000069g0390.1	-2.76929	3.2579	3.31713e-11	2.9169e-09	15.377	13.509	13.441	2.854	1.147	1.714
Nitab4.5_0003603g0120.1	-2.77204	5.65817	2.13269e-11	1.94326e-09	104.371	46.031	103.113	11.534	15.195	10.469
Nitab4.5_0000343g0160.1	-2.78649	5.56656	3.97516e-18	1.08173e-15	98.17	60.284	79.096	15.641	8.535	9.677
Nitab4.5_0000965g0070.1	-2.78687	5.22613	6.68024e-34	1.49467e-30	65.891	60.581	60.067	7.398	8.348	11.179
Nitab4.5_0000057g0320.1	-2.79689	4.14429	8.42837e-05	0.00153308	42.83	17.565	24.699	4.903	0	7.022
Nitab4.5_0000525g0160.1	-2.80973	6.59023	8.63211e-19	2.53462e-16	111.885	204.179	172.782	19.359	25.362	25.472
Nitab4.5_0000157g0250.1	-2.8158	3.0001	3.17135e-05	0.000661777	14.838	14.005	5.474	3.524	0.326	1.419
Nitab4.5_0002311g0040.1	-2.82011	4.55026	1.96427e-05	0.000434664	49.582	52.815	12.624	4.456	3.19	8.783
Nitab4.5_0001117g0060.1	-2.8248	4.10002	2.70181e-11	2.41806e-09	29.04	34.972	17.891	4.369	2.192	4.958
Nitab4.5_0004194g0100.1	-2.83644	4.55861	5.48098e-05	0.00105585	76.072	14.6	26.014	4.515	3.89	7.778
Nitab4.5_0000036g0030.1	-2.84041	3.31104	5.9124e-12	5.86492e-10	16.415	15.483	12.769	2.961	0.933	2.838
Nitab4.5_0001952g0160.1	-2.85665	5.87735	7.43811e-32	1.15216e-28	110.319	96.277	91.099	18.087	10.475	13.132
Nitab4.5_0000203g0240.1	-2.85927	3.68159	7.19143e-15	1.14027e-12	24.648	17.912	18.16	3.311	3.162	1.548
Nitab4.5_0003618g0040.1	-2.86309	2.6599	4.46994e-07	1.59312e-05	8.678	10.206	7.191	1.806	0.653	0.47
Nitab4.5_0000308g0390.1	-2.8631	2.66035	4.46994e-07	1.59312e-05	9.091	6.863	10.244	1.039	0.382	1.124
Nitab4.5_0000227g0020.1	-2.87853	3.04349	6.46687e-09	3.55802e-07	16.055	11.525	8.299	2.32	0.821	2.203
Nitab4.5_0002700g0160.1	-2.88416	1.83509	0.00159905	0.0178492	2.36	3.184	5.65	1.155	0.298	0.323
Nitab4.5_0000021g0010.1	-2.88643	3.98811	2.2526e-12	2.46525e-10	32.829	17.357	25.951	3.922	4.403	2.009
Nitab4.5_0001569g0160.1	-2.88698	8.16777	0.00024125	0.00373697	562.432	682.668	237.95	147.32	25.651	29.536
Nitab4.5_0005367g0010.1	-2.90062	6.04675	5.35857e-31	7.70753e-28	108.086	131.844	96.945	13.524	16.836	14.727
Nitab4.5_0000130g0070.1	-2.95442	2.21505	2.75449e-05	0.000587576	7.768	4.642	4.853	0	0.187	1.981
Nitab4.5_0000141g0090.1	-2.96805	2.93455	5.88377e-09	3.28204e-07	10.139	9.363	13.534	1.971	1.194	0.857
Nitab4.5_0003061g0020.1	-2.97747	2.73977	7.95557e-08	3.40854e-06	10.234	10.513	7.554	1.078	0.681	1.309
Nitab4.5_0000490g0020.1	-2.99158	5.53535	6.96752e-39	2.8061e-35	81.194	73.177	82.573	10.301	11.324	7.916
Nitab4.5_0003769g0040.1	-3.03205	5.4383	1.08757e-27	1.04288e-24	85.681	67.345	68.231	13.495	6.818	6.93
Nitab4.5_0004794g0040.1	-3.05091	1.92841	0.000221748	0.00349128	5.292	4.602	2.752	1	0.093	0.405
Nitab4.5_0000903g0100.1	-3.05091	1.9286	0.000221748	0.00349128	5.979	4.136	2.67	0	0.448	0.479
Nitab4.5_0000238g0040.1	-3.05974	4.80896	2.14294e-14	3.06046e-12	60.377	31.877	49.937	5.34	3.619	7.769
Nitab4.5_0002456g0180.1	-3.06753	3.61438	0.000168602	0.00277834	35.422	12.785	9.903	3.981	0	2.59
Nitab4.5_0000681g0080.1	-3.06887	5.92579	0.000816745	0.0103323	214.955	58.816	41.99	27.116	4.123	6.626
Nitab4.5_0003514g0040.1	-3.10541	7.22975	5.32576e-17	1.2617e-14	308.256	255.774	220.97	48.379	21.304	22.357
Nitab4.5_0008115g0010.1	-3.12594	2.60737	0.00143543	0.0163122	16.753	2.728	6.022	1.544	1.67	0
Nitab4.5_0001454g0010.1	-3.12742	1.97406	0.000121422	0.00209338	6.286	2.509	5.05	0.718	0.914	0.194
Nitab4.5_0003603g0090.1	-3.14121	5.08488	8.65916e-12	8.38315e-10	77.596	30.965	64.765	6.466	8.432	5.032
Nitab4.5_0000812g0020.1	-3.17399	2.35736	2.1087e-05	0.000463063	9.737	7.3	3.653	1.087	0.326	0.47
Nitab4.5_0000166g0100.1	-3.18715	6.10886	5.6704e-14	7.56191e-12	153.128	103.904	103.92	7.243	10.344	22.155
Nitab4.5_0001361g0120.1	-3.20007	2.01618	6.62277e-05	0.00124871	4.657	5.614	4.232	0.466	0	0.525
Nitab4.5_0004251g0010.1	-3.2075	3.4475	1.036e-07	4.24887e-06	27.802	11.466	13.214	0.631	1.408	3.161
Nitab4.5_0002342g0050.1	-3.22416	3.97666	1.15244e-21	5.15705e-19	26.543	23.556	27.214	5.184	2.089	1.64
Nitab4.5_0000303g0190.1	-3.26713	4.75295	9.18101e-16	1.71183e-13	62.737	31.967	43.315	4.602	5.158	4.129
Nitab4.5_0004234g0010.1	-3.26925	2.05925	3.5994e-05	0.000735104	4.286	3.571	6.85	1.204	0.243	0.184
Nitab4.5_0002113g0200.1	-3.26925	2.05857	3.5994e-05	0.000735104	6.001	4.711	4.222	0.117	0.821	0.885
Nitab4.5_0000595g0010.1	-3.27466	4.46516	1.0922e-05	0.000259665	32.85	12.864	66.276	2.544	2.248	6.248
Nitab4.5_0002408g0020.1	-3.30456	5.12865	2.39783e-26	2.01188e-23	69.193	46.983	64.982	5.398	5.708	7.391
Nitab4.5_0002093g0020.1	-3.30468	3.92997	1.27498e-21	5.58137e-19	21.357	27.484	26.003	3.01	2.975	1.862
Nitab4.5_0000852g0080.1	-3.37459	1.62802	0.00183304	0.019974	3.831	3.719	1.997	0.845	0.215	0.23
Nitab4.5_0003298g0050.1	-3.38373	5.78119	3.69247e-33	7.43552e-30	88.666	114.943	86.112	10.816	6.725	10.036
Nitab4.5_0001200g0120.1	-3.38788	5.04193	4.8224e-20	1.70366e-17	66.663	40.556	63.327	5.689	7.443	3.152
Nitab4.5_0005050g0070.1	-3.39314	2.13821	0.000964555	0.0117645	6.212	9.204	1.635	0.631	0	0.405
Nitab4.5_0006658g0010.1	-3.39543	3.44554	7.7597e-09	4.1892e-07	19.103	22.405	10.399	3.66	0.923	0.746
Nitab4.5_0003631g0020.1	-3.39859	2.13912	1.2921e-05	0.00030045	4.307	3.878	7.864	0	0	1.263
Nitab4.5_0000787g0230.1	-3.40748	2.14081	0.000858755	0.0107475	10.372	1.875	4.056	0.748	0	0.691
Nitab4.5_0000915g0100.1	-3.40997	6.14005	2.41438e-16	5.11773e-14	180.761	76.331	116.657	12.602	13.59	9.243
Nitab4.5_0000149g0240.1	-3.41203	5.22511	1.43557e-38	4.81802e-35	64.134	60.74	70.477	8.466	5.028	5.188
Nitab4.5_0002322g0170.1	-3.42442	4.24801	2.68648e-22	1.28804e-19	33.813	36.549	24.937	3.233	1.977	3.318
Nitab4.5_0000759g0050.1	-3.47073	3.10689	8.71304e-10	6.05016e-08	12.488	8.996	18.005	1.097	1.502	0.553
Nitab4.5_0002356g0060.1	-3.49224	5.24641	1.64923e-21	7.06607e-19	64.727	81.707	52.534	9.524	3.255	4.737
Nitab4.5_0001780g0050.1	-3.51508	2.21553	0.000193749	0.00310891	7.927	7.607	2.442	0	1.539	0
Nitab4.5_0000109g0190.1	-3.57267	2.25208	1.63222e-06	4.95746e-05	4.847	7.429	5.629	0.65	0.681	0
Nitab4.5_0005061g0010.1	-3.6134	3.43171	2.29562e-11	2.08229e-09	16.986	11.297	24.006	0.951	1.856	1.216
Nitab4.5_0000184g0280.1	-3.62639	2.28895	8.72618e-07	2.85722e-05	7.969	5.822	5.536	0.689	0.7	0.194
Nitab4.5_0000297g0170.1	-3.63503	7.21549	0.000299857	0.0044811	236.661	522.765	42.269	43.718	9.467	11.99
Nitab4.5_0000680g0050.1	-3.68426	4.26271	0.000130634	0.0022293	31.792	61.256	4.946	3.932	1.464	2.239
Nitab4.5_0001671g0140.1	-3.79483	3.36412	7.05665e-17	1.65232e-14	16.658	18.656	15.076	1.524	0.821	1.281
Nitab4.5_0000590g0010.1	-3.82339	2.42407	3.96985e-07	1.43263e-05	6.085	5.763	11.134	0.583	0.606	0
Nitab4.5_0000257g0150.1	-3.85561	5.62387	2.1513e-24	1.39744e-21	90.994	112.692	61.588	6.854	4.123	7.032
Nitab4.5_0000119g0120.1	-3.88276	2.86555	3.76598e-11	3.26878e-09	9.61	10.156	14.062	0.398	0.634	0.682
Nitab4.5_0001121g0050.1	-3.91243	3.18651	0.000628793	0.00831385	11.112	4.285	28.321	0	0	2.792
Nitab4.5_0001194g0050.1	-3.98237	1.97389	1.10014e-05	0.000260936	4.424	4.195	5.732	0.34	0.7	0.313
Nitab4.5_0000588g0010.1	-3.98238	1.97451	1.10014e-05	0.000260936	4.985	2.985	6.405	0.437	0.14	0.295
Nitab4.5_0000257g0180.1	-4.0758	2.60481	1.50882e-09	9.52446e-08	7.673	10.384	8.816	0.408	0.177	0.442
Nitab4.5_0000131g0190.1	-4.09282	4.1756	0.000265003	0.00405499	21.494	17	55.763	0	0	5.133
Nitab4.5_0000716g0020.1	-4.22411	3.13007	1.66035e-06	5.02775e-05	24.32	5.802	12.107	1.058	0.205	0.875
Nitab4.5_0001079g0130.1	-4.24114	2.13945	8.08295e-07	2.67708e-05	6.202	6.516	4.998	0.194	0.159	0.47
Nitab4.5_0002155g0050.1	-4.29071	2.76767	9.30041e-11	7.64418e-09	13.208	10.384	7.078	0.524	0.644	0.313
Nitab4.5_0000082g0210.1	-4.31369	3.80117	2.84114e-19	9.22776e-17	30.003	24.379	17.529	0.883	1.959	0.479
Nitab4.5_0002787g0010.1	-4.33602	5.34689	3.62539e-21	1.48989e-18	70.558	92.726	58.691	2.437	7.695	0.719
Nitab4.5_0005893g0010.1	-4.46344	5.27462	4.18237e-17	1.0147e-14	110.785	42.698	58.97	3.068	2.537	4.073
Nitab4.5_0002547g0010.1	-4.51964	3.71027	5.47331e-25	3.80056e-22	20.5	24.32	22.257	1.738	0.513	0.166
Nitab4.5_0000714g0090.1	-4.53502	3.7232	2.82466e-25	2.10667e-22	21.145	23.12	23.478	0.204	1.045	1.235
Nitab4.5_0001252g0080.1	-4.5825	5.39534	6.77195e-09	3.71572e-07	84.538	127.024	19.929	5.155	1.772	2.415
Nitab4.5_0001285g0010.1	-4.69712	1.31888	0.00390854	0.0362535	1.259	2.202	2.835	0.117	0	0
Nitab4.5_0000573g0170.1	-4.69712	1.31898	0.00390854	0.0362535	2.508	2.301	2.494	0.243	0.243	0.129
Nitab4.5_0004247g0010.1	-4.69712	1.31898	0.00390854	0.0362535	2.445	2.142	2.37	0.078	0.326	0.258
Nitab4.5_0004955g0010.1	-4.69712	1.31908	0.00390854	0.0362535	3.037	1.845	1.2	0	0	0
Nitab4.5_0000082g0180.1	-4.84355	1.3861	0.00195456	0.0209244	1.408	3.104	2.949	0	0	0
Nitab4.5_0001151g0060.1	-4.93334	2.63385	3.86625e-11	3.3414e-09	9.133	9.889	9.261	0	0.187	0.71
Nitab4.5_0001224g0010.1	-5.20964	1.57084	0.000300194	0.0044811	1.154	5.118	2.856	0	0	0
Nitab4.5_0003674g0090.1	-5.21081	1.5722	0.000279503	0.00422023	5.048	1.884	2.101	0	0	0
Nitab4.5_0000109g0250.1	-5.25015	6.11958	1.06441e-39	5.35852e-36	166.452	109.359	117.94	2.845	6.389	1.604
Nitab4.5_0002334g0100.1	-5.30126	3.59965	1.56458e-25	1.21177e-22	18.044	20.948	23.892	0	0.634	0.507
Nitab4.5_0000118g0110.1	-5.41169	1.68321	0.000100341	0.00178023	5.239	4.146	1.707	0.252	0	0.138
Nitab4.5_0001574g0130.1	-5.53906	6.39881	2.97818e-52	2.99858e-48	159.52	192.733	127.75	4.107	4.253	2.009
Nitab4.5_0000037g0360.1	-5.65119	8.42565	1.34838e-09	8.67487e-08	583.525	482.259	906.056	7.621	1.735	29.38
Nitab4.5_0001103g0080.1	-5.66904	1.83561	7.64841e-06	0.000189909	4.54	5.376	2.68	0.33	0	0.12
Nitab4.5_0002147g0020.1	-5.81821	1.92942	9.56938e-07	3.10304e-05	5.112	5.653	3.818	0	0	0.313
Nitab4.5_0001276g0030.1	-5.89285	1.97553	1.19526e-05	0.00028085	8.445	2.39	5.298	0	0	0
Nitab4.5_0002606g0050.1	-5.97755	3.49428	7.09079e-16	1.37295e-13	11.864	23.427	22.868	0	0.989	0
Nitab4.5_0002577g0030.1	-6.01368	4.24178	1.32078e-30	1.7731e-27	25.95	38.92	37.965	0.447	0.597	0.083
Nitab4.5_0001647g0020.1	-6.23784	2.21579	0.00241055	0.0247281	0	7.29	12.055	0	0	0
Nitab4.5_0001276g0020.1	-6.73204	2.57757	3.68209e-12	3.84178e-10	7.959	8.986	9.965	0	0	0
Nitab4.5_0006477g0060.1	-7.33256	3.05114	0.00343129	0.0327591	37.56	4.235	0	0	0	0
Nitab4.5_0003395g0040.1	-7.47859	3.18658	2.8067e-20	1.00926e-17	15.25	16.127	14.683	0	0	0
Nitab4.5_0000264g0140.1	-7.92852	3.58394	0.00048585	0.00673335	28.405	35.2	0	0	0	0
