# Supplementary material for: Transcriptomics and iTRAQ-proteomics analyses provide novel insights into the defense mechanism of black shank disease in tobacco
Source: Front Plant Sci. 2022 Oct 20;13:991074. doi: 10.3389/fpls.2022.991074 (PMC9634741; doi:10.3389/fpls.2022.991074)
Supplement: Supplementary file 4 [file Table_4.XLSX]

## Sheet: Sheet1
Supplementary Table S4. List of primers used in this study.
Gene		Sequence
Leucine-rich repeat	F	gctcgagtggcctatgagac
	R	atgagcctagcgagtccaaa
EXORDIUM-like	F	tagccaaatggtggaagacc
	R	gcaacatcagaggcagtcaa
KELP-like	F	aaaggcatttgtacggcaag
	R	atgtgacaatcggcaaacaa
VIP1-like	F	tgctgagttggctttgattg
	R	ctccttgttccaaagcttgc
Annexin D4-like	F	ttcagcttcgccaagaattt
	R	cttcttgcacccaaaagctc
NtPR-1B	F	cctttcttggaagctcatgc
	R	cacaactctggtgcctctga
Nt26S	F	gaagaaggtcccaagggttc
	R	tctccctttaacaccaacgg
